# Supplementary material for: Epigenetic CRISPR Screens Identify Npm1 as a Therapeutic Vulnerability in Non–Small Cell Lung Cancer
Source: Oxford University Press journal article supplement (doi:10.1158/0008-5472.can-19-3782), 2020-07-09
Supplement: 00085472can193782-sup-233330_3_supp_6380846_qcfk16.xlsx [file 00085472can193782-sup-233330_3_supp_6380846_qcfk16.xlsx]

## Sheet: In vitro
Gene ID	Symbol	OligoSeq	Library	Clone 7 Week 2	Clone 7 Week 4	Clone 9 Week 2	Clone 9 Week 4
2410016O06Rik	KY001700	CCGAAGGCACCGGAAAAGTG	1709	1256	1082	833	920
2410016O06Rik	KY001701	AAGCCTTCTCGCCCACCGTG	5334	651	449	441	506
2410016O06Rik	KY001702	GGGCGCGCTGACACCGGCCG	2299	154	267	84	87
2410016O06Rik	KY001703	GGCGAAGCCCGGGGTCGCCC	24	801	901	733	702
2410016O06Rik	MGLibA_00864	GACGCCGCGCGCTACGTCGA	4499	1006	815	728	782
2410016O06Rik	MGLibA_00865	TCTGGCGCGTCTACCGACCG	4875	220	133	389	255
2410016O06Rik	MGLibA_00866	CCGTCCATCGACGTAGCGCG	3462	700	770	724	748
2410016O06Rik	MGLibB_00864	GCAGGACCGCAGCTACTACG	2564	821	877	650	961
2410016O06Rik	MGLibB_00865	CGCTACGAGGACGTGCAATT	3525	8	2	3	0
2410016O06Rik	MGLibB_00866	GCTCGCACGCGGATGAGCCG	693	858	671	422	357
2610002M06Rik	KY001812	GTTCAAACTGCAGTAACAAT	2274	1947	2402	1477	2963
2610002M06Rik	KY001813	TTTCTTGAGAATGAGTGCTA	1672	232	191	356	436
2610002M06Rik	MGLibA_00909	AGATTTAACTACACCTGCCA	2213	453	612	234	159
2610002M06Rik	MGLibA_00910	CTCTTACCTGTGGTGTCGTA	4432	638	696	583	1012
2610002M06Rik	MGLibA_00911	TACTACCCTTACGACACCAC	7413	475	528	333	433
2610002M06Rik	MGLibB_00909	AATCTATGGATGCTACATTG	3408	987	816	1033	1307
2610002M06Rik	MGLibB_00910	AGTTCAAACTGCAGTAACAA	1178	190	238	297	419
2610002M06Rik	MGLibB_00911	TTGCTGCAAAAGAACTTAAT	1535	928	1288	650	997
4632428N05Rik	KY002218	GTACCTCAGCTCACGAGGCG	2882	740	819	911	1556
4632428N05Rik	KY002219	ATGTGAAGTTGCGTATGGGC	2853	1289	1178	1513	2295
4632428N05Rik	KY002220	TGCAATGTGAAGTTGCGTAT	3670	718	528	767	1015
4632428N05Rik	KY002221	CTGCAATGTGAAGTTGCGTA	2723	1142	1027	1291	1528
4632428N05Rik	KY002222	CCTTGGGGTCACATTGCGCA	4287	803	1056	1078	1704
4632428N05Rik	MGLibA_01107	ACGGTACTTACGGCGGTGAG	1743	1110	1372	1175	1241
4632428N05Rik	MGLibA_01108	CTACGGGTCCATGGAGCTAC	4018	816	523	727	1094
4632428N05Rik	MGLibA_01109	ATGTGACCATCTACAAGACG	1728	555	405	517	863
4632428N05Rik	MGLibB_01107	CCTTACAGGCATCACGGCTG	3152	457	540	377	603
4632428N05Rik	MGLibB_01108	CGGCGACATGGGTGTCCCCG	3263	1325	1449	1040	1852
4632428N05Rik	MGLibB_01109	CTCATTAGACGCCATGCATG	4807	462	418	385	273
Aanat	KY004017	GCGTTTGAGATTGAGCGGGA	1350	1879	1835	1699	1982
Aanat	KY004021	CTTCATCATTGGCTCGCTGT	3919	127	134	190	137
Aanat	MGLibA_02217	GATGCCACGCCTTCCTGCGC	6362	353	234	315	144
Aanat	MGLibA_02218	CCGCTCAATCTCAAACGCAC	1930	964	1030	860	1386
Aanat	MGLibA_02219	TGTGCACCGCCAGTACGTGC	8232	494	597	558	656
Aanat	MGLibB_02217	CCAGTGCGTTTGAGATTGAG	4164	687	589	715	1059
Aanat	MGLibB_02218	CCCTCTACTTGGATGAGATC	2144	1401	1568	1238	1283
Aanat	MGLibB_02219	CCTTCATCATTGGCTCGCTG	4954	1038	1062	987	1692
Ado	KY005608	ATGCCCGGGTGGTCGTGCAG	3777	679	676	769	1589
Ado	KY005609	ATGTGCATGTAGGTGACCGG	3289	815	746	958	854
Ado	KY005610	GGTGACCGGCGGGAGGTTGC	2838	1098	881	948	1432
Ado	KY005611	GGCTGCGGCAGCGCCTTGCG	3585	645	640	644	863
Ado	MGLibA_03243	CCTCAACATCGCGCCGCGCA	5369	663	442	593	760
Ado	MGLibA_03244	AAGCATGCCCCGCGACAACA	2770	2078	2129	1724	2622
Ado	MGLibA_03245	ACGCCTGGCGAGCGATGCGC	5786	1394	1220	1404	1913
Ado	MGLibB_03243	CCTTGCGCGGCGCGATGTTG	4166	1343	1372	1178	1301
Ado	MGLibB_03244	GCCCGTCGAGCTGCCGCGGA	5327	1261	1263	1053	1007
Ado	MGLibB_03245	ACGCAGCACGCCCGGTCGCA	5461	1402	1253	1439	1493
Adora1	KY005613	GGGCTCCCCAACACTGCCGT	3636	2090	2574	1807	2123
Adora1	KY005614	GACAGTGGTGACTCAGCGGC	1903	1999	1791	2087	2986
Adora1	KY005615	TGCTATGAACTCACCGGAGA	1594	340	414	336	406
Adora1	KY005616	ATCCCTGGCGGTAGCTGATG	4598	1420	1359	1282	1613
Adora1	KY005617	CTGCTTCATCGTATCCCTGG	6115	691	668	518	675
Adora1	MGLibA_03231	GCTCAAGATCGCCAAGTCGC	3100	694	632	732	1806
Adora1	MGLibA_03232	AACACTGCCGTTGGCTATCC	5060	1081	809	876	1195
Adora1	MGLibA_03233	CACCATGCCGCCGTACATCT	7643	1913	1945	1508	1838
Adora1	MGLibB_03231	CTTCTGCTTCATCGTATCCC	8695	371	377	317	462
Adora1	MGLibB_03232	TGATGTGGCTGTTGGCGCCC	7244	1906	1744	1813	2501
Adora1	MGLibB_03233	AGGTAGCATCGCGAAGTGCC	2518	1556	2209	1464	2056
Adora2a	KY005618	GAACGTCACCAACTTCTTCG	3323	822	872	820	673
Adora2a	KY005619	CTTCGTGGTATCTCTGGCGG	3170	1325	1368	1244	1881
Adora2a	KY005620	TGGCTTGGTGACGGGTATGA	3126	539	603	470	474
Adora2a	KY005621	GGGCATCATTGCGATTTGCT	2873	750	876	736	1110
Adora2a	KY005622	CTCCACAAAGACCTGCGGCG	1856	858	961	609	452
Adora2a	MGLibA_03234	TCTGGCGGCGGCTGACATCG	5033	1021	809	923	1100
Adora2a	MGLibA_03235	TCGCCATCCGAATTCCACTC	6284	399	427	350	263
Adora2a	MGLibA_03236	AGCGAGTCCGCTCCCCTGGT	2764	1917	2138	1725	4668
Adora2a	MGLibB_03234	CGTGGTACCCATGAATTACA	2961	849	737	930	1656
Adora2a	MGLibB_03235	AGCACACAAGCACGTTACCC	3411	939	867	869	1224
Adora2a	MGLibB_03236	TGTCGATGGCAATAGCCAAG	2328	1041	731	701	888
Adora2b	KY005623	CTTTCTGGTATCCCTGGCGA	3481	734	715	593	900
Adora2b	KY005624	GCGACGGCAGACGTGGCCGT	2097	781	709	708	672
Adora2b	KY005626	GCACCAGCACGAAGCAGGCG	1966	659	645	558	564
Adora2b	MGLibA_03237	GACGCAAGACGCGCTGTACG	2568	365	336	397	501
Adora2b	MGLibA_03238	GGTGGCTGTCGACCGATATC	2889	445	648	427	426
Adora2b	MGLibA_03239	TCACTGGGACACGAGCGAGA	1572	599	726	564	802
Adora2b	MGLibB_03237	CATTGGATTGACTCCGTTCC	5024	1436	1746	1148	1600
Adora2b	MGLibB_03238	TCACCTGAGCGGGACGCGAA	1341	743	699	664	969
Adora2b	MGLibB_03239	ATCCCTGGCGACGGCAGACG	3271	868	911	735	787
Adora3	MGLibA_03240	CCCTAATAGCACCAACCGTG	2754	3870	4155	3096	4248
Adora3	MGLibA_03241	TTTGTGCCACTTCCGTTCCG	11184	973	914	857	1650
Adora3	MGLibA_03242	ACCAGATGTCGCAATGTGCC	3765	382	267	323	301
Adora3	MGLibB_03240	CTTACCGGAAAAGAGAGCCA	1205	775	585	658	740
Adora3	MGLibB_03241	CTTGGTGTGGTCCTTGTAGT	3775	305	322	169	129
Adora3	MGLibB_03242	CTTTGGAAGCCCTACAGCTC	1513	911	924	1051	1907
Aire	KY006233	CCTAACTCACCGTTTCCAAG	2334	101	34	100	147
Aire	KY006234	TCCCTTTCCGGGACTGGTTT	1652	566	668	460	937
Aire	KY006235	CCTTGCTGGTCCCAAGGCCG	2122	1087	881	987	1207
Aire	MGLibA_03564	GGATCCCTTCCACGGCCCCT	2180	251	382	217	365
Aire	MGLibA_03565	GCAGGAGACGCTCCGTCTGA	2944	426	279	364	463
Aire	MGLibA_03566	CCGGGACAGTGGGGCCATCC	4465	606	473	710	1219
Aire	MGLibB_03564	TCTTAGGGGGCTTAGTCTTC	3754	650	1031	629	518
Aire	MGLibB_03565	GGAAGGGATCCTTATCCAGC	1026	988	871	822	916
Aire	MGLibB_03566	TGGGCTGGAGACGCTCTTTG	4868	619	588	603	1295
Akap1	KY006286	AACGCATCCTCGTCCTTAAC	2659	689	632	712	1305
Akap1	KY006287	TCTCTCCAGAGGCCGCATAC	5795	1993	3074	1690	2523
Akap1	KY006288	GGTTAAGGACGAGGATGCGT	1774	549	521	520	476
Akap1	KY006289	CAGAGATGAGATCGCCAAAG	1645	1919	1917	1403	2509
Akap1	KY006290	GGCCTTGCCGAGGACTCGCC	2759	844	847	927	3600
Akap1	MGLibA_03615	CAGTGGTGGCGCATAGATAT	3367	791	818	671	728
Akap1	MGLibA_03616	CACTTAGTTGGTCGACTGAT	3940	496	478	483	792
Akap1	MGLibA_03617	CGATAGCCCCCAGAGTGTCC	3873	235	265	189	194
Akap1	MGLibB_03615	ACTCTGGGGGCTATCGGGCT	2379	553	560	343	401
Akap1	MGLibB_03616	CTTCCTTGCCGATGACGTCT	6882	283	311	373	621
Akap1	MGLibB_03617	CTTCCATGCACTGCGCAGTC	6749	325	458	237	909
Alg10b	KY006634	CAGGCGCAGCGGTACTGCGA	5610	293	247	286	303
Alg10b	KY006635	AGTACCGCTGCGCCTGCGGC	3510	243	348	149	111
Alg10b	KY006636	GGAGAGGCTTGCGCCCACGA	2029	333	112	334	280
Alg10b	KY006637	GAGAGGCTTGCGCCCACGAA	1398	1046	430	1083	1188
Alg10b	KY006638	TCCGAGAGCGGTCCCTTCGT	7862	758	1139	445	485
Alg10b	MGLibA_03819	GTATCTGGTGTCGGTCGGTG	6721	1677	1575	1493	1918
Alg10b	MGLibA_03821	CATAGGACCTCGGCCTTGCT	2984	600	317	487	215
Alg10b	MGLibB_03819	TACGCTTCCAAACTAAGCTA	1562	276	268	799	25606
Alg10b	MGLibB_03821	CTCCCGCAGAGCGCGGCTGA	2026	1384	842	1085	1040
Alg13	KY006649	CTTGTCCTCCAAGTTGGTAG	3401	952	1061	818	1216
Alg13	KY006650	CAGTGCCTCTACCAACTTGG	2740	545	537	369	706
Alg13	KY006651	TGACTCAGTACGGAATGGTT	2446	204	237	168	163
Alg13	KY006652	GTGAATGACTCAGTACGGAA	1296	794	917	508	511
Alg13	KY006653	TCTCAGATACTTTACCTGCG	5045	137	84	224	407
Alg13	MGLibA_03828	GTTTCGACGAGCTCGTCGCA	2816	857	529	665	334
Alg13	MGLibA_03829	GGTCGCTAACGACTGCGTTC	2448	244	249	177	189
Alg13	MGLibA_03830	GGTTGTAACCCAGACTCTCG	1204	284	183	325	297
Alg13	MGLibB_03828	GATCTTGTCATTAGCCACGC	3835	623	539	547	497
Alg13	MGLibB_03829	TCCATTGACTGTAACAGCCC	4098	580	395	415	714
Alg13	MGLibB_03830	GAACAATCATCAATTTGAAT	1004	632	580	541	440
Alkbh1	KY006694	AGTCTCTCTAGTAAACTTCG	1265	620	443	447	427
Alkbh1	KY006695	TTTACTAGAGAGACTGCGTT	1934	470	925	350	537
Alkbh1	KY006696	TGGAGGGCCTATGGACTCGA	3270	350	223	298	270
Alkbh1	KY006697	GAGCGTGATGCCGAGAGGGT	1170	250	222	263	295
Alkbh1	KY006698	CACTGAGCGTGATGCCGAGA	3214	598	480	489	427
Alkbh1	MGLibA_03855	TCACTGAGCGTGATGCCGAG	4196	536	486	525	553
Alkbh1	MGLibA_03856	AGTCTAGGCGATAGTAATTC	1550	952	1022	1046	1481
Alkbh1	MGLibA_03857	CTATCGCCTAGACTCCACAC	2481	336	187	188	210
Alkbh1	MGLibB_03855	AGGATAGCCTTCGAGTCCAT	2204	175	284	170	300
Alkbh1	MGLibB_03856	CCTTACTGTCCCAGTTATAA	2397	376	457	183	313
Alkbh1	MGLibB_03857	GTTTACTAGAGAGACTGCGT	1462	325	198	507	1267
Alkbh2	KY006700	CGTGAGGCCAGCATCGCCAT	4699	1065	1145	1016	1926
Alkbh2	KY006701	GTTCTTCTACGCAGGTGCAC	2809	930	1076	775	678
Alkbh2	KY006702	CTGCCTCGGCTTTGCCGAAT	3621	759	697	793	803
Alkbh2	MGLibA_03858	TGGCGACACCTTCGCGCGGA	2264	404	452	375	555
Alkbh2	MGLibA_03859	CGAAAAGTCAAGTTGACCCG	1331	574	350	372	595
Alkbh2	MGLibA_03860	TGTGATTACACCGTCCTATT	4297	295	311	162	103
Alkbh2	MGLibB_03858	TGTTCGAGATCGAGTCTGCG	3794	311	320	264	229
Alkbh2	MGLibB_03859	CATCTCTGTGCTCGCCGATG	5381	1014	867	1045	1049
Alkbh2	MGLibB_03860	GACCAGAAAACGTGTACGTG	2125	826	787	720	1258
Alkbh3	KY006704	TTGTAACATACGTGAGGATT	2486	373	169	372	360
Alkbh3	KY006705	GTGATTCTCGAGTAAGTGTA	1702	270	359	262	331
Alkbh3	KY006706	TAGACACACCAGTAGGTGAC	2670	459	582	531	494
Alkbh3	KY006707	CCAGGCTGGCCCCGCGGTCT	4405	857	1256	816	2147
Alkbh3	MGLibA_03861	AGCCGTCTTTCCCAGACCGC	3152	438	489	439	496
Alkbh3	MGLibA_03862	TTAAGGGTGTGCTTATATCC	3672	429	294	657	725
Alkbh3	MGLibA_03863	GCTTACTTACTCAATCACTC	3019	432	266	571	819
Alkbh3	MGLibB_03861	GCCCCGCGGTCTGGGAAAGA	1883	625	662	449	574
Alkbh3	MGLibB_03862	ACTTACCTAGACACACCAGT	2150	303	215	381	238
Alkbh3	MGLibB_03863	AGCTTTGTAAGGATGTCCCC	2766	559	543	428	343
Angpt2	KY007075	GCACTGAGTCGTCGTAGTCG	4336	384	618	367	502
Angpt2	KY007076	ACTGAGTCGTCGTAGTCGAG	1609	346	244	343	441
Angpt2	KY007077	GGAGGAAGATCGGCAGCTGT	1727	516	347	535	688
Angpt2	KY007078	AGCTGTCGGTCTCCGGCAGC	2380	1347	1144	1115	1609
Angpt2	MGLibA_04131	ACGGATAGCAACCGAGCTCT	1516	425	315	391	352
Angpt2	MGLibA_04132	GCAGCTCGAGTCTTGTCGTC	4013	822	850	843	1149
Angpt2	MGLibA_04133	AAGGAGCGAGTTGTTGACCG	2246	1115	1061	960	1741
Angpt2	MGLibB_04131	AGCTGTTGACGGTCTCCATT	4435	635	644	562	508
Angpt2	MGLibB_04132	CTAGCTGGAGAATTACATTC	1580	482	592	620	691
Angpt2	MGLibB_04133	GATTTCCGCACAGTCTCTGA	2863	326	214	365	395
Apc	KY007739	CCCGACTTCCGTAGGAGCGA	2047	1415	9423	722	1062
Apc	KY007741	CCTACTATCATCATGTCGAT	3693	479	558	502	735
Apc	KY007742	GTACACCTGCTGAATACGAG	1812	382	365	398	926
Apc	MGLibA_04599	GGATCTGTATCCAGCCGTTC	2787	440	442	315	545
Apc	MGLibA_04600	GACTTACTAGAGCGTCTTAA	1957	1734	2123	1091	2018
Apc	MGLibA_04601	AGATCCTTCCCGACTTCCGT	5161	2747	3260	2100	2948
Apc	MGLibB_04599	GTGCACGCTTCTCCATGTCC	10878	1148	1202	998	1717
Apc	MGLibB_04601	GAAGATGAGACTATGACTTC	1792	571	634	419	585
Areg	KY008079	GGGAAAGGCGAATCGCTTTC	1408	903	1212	832	780
Areg	KY008080	GGAAAGGCGAATCGCTTTCT	1905	1381	1313	1042	1451
Areg	KY008082	AGAAGGCATTTCGCTTATGG	2391	491	367	642	1018
Areg	MGLibA_04830	GCCAGAAGGCATTTCGCTTA	3278	207	149	307	499
Areg	MGLibA_04831	AGGGGACTACGACTACTCAG	1301	1725	2569	1284	1504
Areg	MGLibA_04832	TGCCGATGCCAATAGCTGCG	4873	371	276	519	986
Areg	MGLibB_04830	ATGCAGATACATCGAGAACC	1236	568	654	392	617
Areg	MGLibB_04831	GCCATCATCCTCGCAGCTAT	4172	212	372	391	418
Areg	MGLibB_04832	GCCTTTGGAAACGATACTTC	1615	341	680	220	279
Arg1	KY008145	GAATAAACTTACTGTTCCCC	2195	431	395	341	424
Arg1	KY008146	GCCAAAGACATCGTGTACAT	2472	352	474	230	493
Arg1	KY008147	TTGGCTTTCCCCACAGACCG	3206	1015	962	703	946
Arg1	KY008148	TGTGAAGAACCCACGGTCTG	2616	459	347	413	425
Arg1	KY008149	GAGTATGACGTGAGAGACCA	1270	838	685	897	1329
Arg1	MGLibA_04878	CTTGCGAGACGTAGACCCTG	4403	477	645	588	641
Arg1	MGLibA_04879	AAGCATCTCTGGCCACGCCA	3394	988	975	1023	989
Arg1	MGLibA_04880	GCCAATGTACACGATGTCTT	3383	1357	1321	1320	1423
Arg1	MGLibB_04878	CTGTTCTTCAGCCTCGAGGA	2479	819	945	805	1354
Arg1	MGLibB_04879	TGGGTTCTTCACAATTTGAA	1700	661	886	502	576
Arg1	MGLibB_04880	CATCCACCCAAATGACACAT	2781	592	679	535	837
Arg2	KY008150	CCAGCTTCTCGAATGGCAGC	1960	1341	1292	1108	1681
Arg2	KY008151	GGTTGTGTATCCTCGTTCAG	2864	1133	939	1005	984
Arg2	KY008153	CTGGCAATAGGTACCATTAT	2986	462	384	504	912
Arg2	KY008154	GTACCATTATCGGTCACGCC	2567	517	510	497	849
Arg2	MGLibA_04881	GTGCCGGGCGTGACCGATAA	2387	921	1117	752	1088
Arg2	MGLibA_04882	CCCCCAAATATTGTGTACAT	3337	509	611	437	942
Arg2	MGLibA_04883	TTCAGTGGGCCTTGCCAACC	4325	776	692	681	675
Arg2	MGLibB_04881	TTGGCAAGGCCCACTGAACG	1677	792	592	596	934
Arg2	MGLibB_04882	CCAATGTACACAATATTTGG	2747	670	870	624	1070
Arg2	MGLibB_04883	CCAGCTGCCATTCGAGAAGC	2217	610	1050	578	847
Arid1a	KY008440	GGACAGATGCACTCGGGCGT	2335	362	463	345	316
Arid1a	KY008441	CAGCAAGGCCCCAGTGCGTA	2505	756	644	633	1495
Arid1a	KY008442	TCTCGGGGAGCTCAGCGCGT	4103	503	399	457	697
Arid1a	KY008443	TTGCCCGAAGCCGTAGGCTG	2802	920	1035	515	507
Arid1a	KY008444	CAGGACGGGGGCGCGGGCAA	2971	939	1084	484	554
Arid1a	MGLibA_05067	GCCCTGCTGGCCATACGCAC	3759	532	349	396	324
Arid1a	MGLibA_05068	GGTCCCTGTTGTTGCGAGTA	2968	548	508	530	407
Arid1a	MGLibA_05069	TAACCCATACTCGCAACAAC	2470	564	1008	315	450
Arid1a	MGLibB_05067	AGTGTCGCGCAGTCTCGCTC	2812	542	456	366	443
Arid1a	MGLibB_05068	TGAGCGAGACTGCGCGACAC	2615	395	276	458	702
Arid1a	MGLibB_05069	CTGCTGCTGATACGAAGGCT	3436	667	506	539	494
Arid1b	KY008445	CCCGCGCCGGTCGCCGTGCC	8917	115	147	212	226
Arid1b	KY008446	CGGCTATGGGAGCTCGTCCT	2408	2357	2158	2245	3105
Arid1b	KY008447	TCTGCCCATGGTCGGTCCGG	9014	697	721	791	1456
Arid1b	KY008448	TGTCTTACTGGTAGACTCGA	2721	515	345	371	713
Arid1b	KY008449	GCTGAAGGCATTCGTCCCAG	2155	1838	1505	1895	3526
Arid1b	MGLibA_05070	CTGTGCACCTGGGGGACCGT	6950	418	249	467	399
Arid1b	MGLibA_05071	ACAGTACCTGCAGCCGGCGG	2817	609	535	474	1255
Arid1b	MGLibA_05072	AGATCGGACCAGACCTCGAT	1059	510	279	460	1050
Arid1b	MGLibB_05070	ATCTCCCCTGCGAGTATTCC	4868	1492	1206	1665	2267
Arid1b	MGLibB_05071	ACAGCTTGCTGTCCGTACTG	3644	887	679	725	621
Arid2	KY008451	CTCAGCTGCGATATTCCCTA	2904	1274	1317	1235	1840
Arid2	KY008452	GCCCGAGAGACGGAACAGTC	1493	611	594	393	697
Arid2	KY008453	GTACCGCAGAGTCGTATGTT	3051	284	178	170	235
Arid2	KY008454	AGAAGTTGTTACGTACTGTG	1417	664	628	455	773
Arid2	MGLibA_05073	TACCAGCAACACAGCGTGTC	3539	289	252	257	246
Arid2	MGLibA_05074	ATAGCGAAGTCCACTTCATT	3062	1009	1383	554	784
Arid2	MGLibA_05075	CACTTTACTGCTCGCTAATG	3264	736	769	539	804
Arid2	MGLibB_05073	TACCTGACACGCTGTGTTGC	5353	764	1289	477	877
Arid2	MGLibB_05074	GCCGTTTAAGAAGATCCCTG	2797	775	1570	608	878
Arid2	MGLibB_05075	TCCGCCTAAAGTAGTGACTC	3484	946	986	627	1080
Arid4a	KY008470	GTCCAGCAAAGGCATTTCCG	2897	319	236	276	347
Arid4a	KY008471	GTTTGAGTCCGTATTCTCCT	4029	325	256	374	389
Arid4a	KY008472	GTGAAGGTCAAGTACGGACG	1631	691	870	825	1010
Arid4a	KY008473	ACTACTACGGATGGAACGTC	2207	603	506	523	601
Arid4a	KY008474	ACTTTGGTTCCCGTCAGGCA	3225	1043	1285	915	789
Arid4a	MGLibA_05085	GATGTCAGTGCCAAGTACCG	1861	141	209	176	208
Arid4a	MGLibA_05086	CTCTTAAAGGGCCCTTTACT	2275	495	722	602	741
Arid4a	MGLibA_05087	GGTGCAAGATGACCAAGTAA	712	371	321	373	379
Arid4a	MGLibB_05085	CGGACCTCACTTTGCCTGAA	2836	344	790	219	398
Arid4a	MGLibB_05086	GCAAATTGACAGATGCTAGT	797	585	538	443	683
Arid4a	MGLibB_05087	TGAGCCTGCCTACCTGACAG	4308	835	639	1293	1217
Arid4b	KY008476	AGCACAGGCCGTTTGTTAAT	2496	419	289	330	254
Arid4b	KY008477	TCAGCAGGCGTCTCCTCTTT	6302	219	99	224	134
Arid4b	KY008478	CGGTGGCAGAGCTAGGACCG	2762	274	123	164	167
Arid4b	KY008479	GAAGAAGAGCAAGCACGATC	1181	571	344	676	1003
Arid4b	MGLibA_05088	GAATCTTGATGGTGCCTATC	2752	1224	935	1055	1210
Arid4b	MGLibA_05089	CCTTCAGTGGGCCCTTTATG	4767	587	618	369	395
Arid4b	MGLibA_05090	ATTGATAACCGCTTCCTGAT	3593	789	661	568	765
Arid4b	MGLibB_05088	TCAGTGCCCACTGTCAAATA	2426	384	148	483	453
Arid4b	MGLibB_05089	AGTTCAGGATGACCACATAA	1382	1219	1742	1201	1626
Arid4b	MGLibB_05090	ACAGAAGGCTCCTCTGTATT	2354	455	547	607	735
Arnt	KY008689	TACAGAGGGCTATTAAGCGA	1537	157	164	170	266
Arnt	KY008690	GGGCTATTAAGCGACGGTCA	926	675	769	667	667
Arnt	KY008691	CAAGCTAACCATCTTACGCA	2246	1384	1787	1271	1616
Arnt	KY008692	AGAAACGGCCATGCGTAAGA	1395	450	284	572	708
Arnt	KY008693	CAGGTGTGGTACTAGCTCCG	2223	279	265	340	233
Arnt	MGLibA_05244	GTTAGCTGTAGTCGCCGCCA	4655	395	242	247	203
Arnt	MGLibA_05245	GCGGCGACTACAGCTAACCC	2122	950	958	708	866
Arnt	MGLibA_05246	GACATCAGATGTACCATCGC	3073	751	852	658	566
Arnt	MGLibB_05244	GCTCCTCCACCTTGAATCCC	5741	1020	879	820	942
Arnt	MGLibB_05245	GCTCTTTGTCATTACACATC	3557	368	312	481	514
Arnt	MGLibB_05246	AGATGTGTAATGACAAAGAG	694	240	231	193	445
Arnt2	MGLibA_05235	CGGATCGACGCTTTCCTCCT	5134	260	355	297	322
Arnt2	MGLibA_05236	ATGGACTTCGATGACGAAGA	1404	1017	961	872	1192
Arnt2	MGLibA_05237	TGGGAGCACGCTTTATGAGC	3700	2179	2298	1805	2511
Arnt2	MGLibB_05235	ACCGGCAACAAATCGACTGA	1751	1480	1680	1341	2596
Arnt2	MGLibB_05236	TGTGCGAGACCGCCATGCGC	5976	478	668	309	275
Arnt2	MGLibB_05237	GGGGCCATGCCTGCCCGAGG	1766	387	420	320	285
Arrb1	KY008742	CTGACCTGCGCCTTCCGGTA	5174	573	612	413	424
Arrb1	KY008743	CTGCGCCTTCCGGTATGGCC	5274	1181	1324	807	956
Arrb1	KY008744	GGCTTCTTGTCCTCGGGGGC	3026	625	589	503	754
Arrb1	KY008745	TGTGCGGCTAGTCATCCGGA	3267	557	521	398	514
Arrb1	KY008746	CAGTGATGCCTCAAGGTGTA	2059	1396	1951	984	1842
Arrb1	MGLibA_05277	ACTCACCCACGGGGTCCACG	2869	918	1377	788	1348
Arrb1	MGLibA_05278	CCGCGGACCATGGGCGACAA	2349	869	947	694	1452
Arrb1	MGLibA_05279	CCGTGTCCCTTTGTCGCCCA	6601	475	476	503	657
Arrb1	MGLibB_05277	CGCCTTTCTTTGAGATACTC	2524	431	406	552	469
Arrb1	MGLibB_05278	TGTGGACCACATTGACCTCG	4204	1013	739	880	1316
Arrb1	MGLibB_05279	TCCCCCAGATGGTGTGGTCC	4304	485	468	372	415
Asf1a	KY008993	TCTGGGATGAGTCCTGCATT	3271	72	44	83	138
Asf1a	KY008994	AATAAATTCTTGACCTCGGT	774	986	962	995	2176
Asf1a	MGLibA_05451	CTGATTACTTGCACCTACCG	4688	1041	1414	776	963
Asf1a	MGLibA_05452	GATCACCTTCGAGTGCATCG	2159	346	356	366	508
Asf1a	MGLibA_05453	CAGGTCCTCGATGCACTCGA	4460	915	773	549	980
Asf1a	MGLibB_05451	TAGGCTGATGCACCGAATGC	5749	1266	1463	1388	1792
Asf1a	MGLibB_05452	TGCATTACCGTCAGCGTCAA	4261	893	858	823	1108
Asf1a	MGLibB_05453	TGTTATGTTAGAATCCCACA	1787	1335	2160	1338	2871
Asf1b	KY008995	GAGTGGAAGATCATTTATGT	1636	900	747	803	1365
Asf1b	KY008996	CATTCCTGAGACGGACGCCG	1951	304	461	296	586
Asf1b	KY008997	ATTCCTGAGACGGACGCCGT	1780	282	373	320	545
Asf1b	KY008998	TGGACAAGAGTTCATCCGTG	3176	975	1242	882	1424
Asf1b	MGLibA_05454	CGCGGTGATGGCCAAGGTGT	3735	1053	1476	867	1508
Asf1b	MGLibA_05455	CACATTCAGCACCGACACCT	4207	774	869	458	1218
Asf1b	MGLibA_05456	GGTGGGTTCTCTCGAAGCTC	856	444	391	529	1341
Asf1b	MGLibB_05454	TGTCCCAGTTGATATGGAAT	3235	110	148	114	103
Asf1b	MGLibB_05455	TGTTGACATAGTAGCCCACA	2327	440	474	226	365
Asf1b	MGLibB_05456	CATAAATGATCTTCCACTCC	4391	857	953	737	901
Ash1l	KY009010	CTCGCAAGCGGAATCGAGAA	704	198	169	181	204
Ash1l	KY009011	ACTTGGCACCGTAGTTGGAC	3188	963	854	704	1588
Ash1l	KY009012	AATCTTCTTCGTAACATCCT	3044	277	360	244	200
Ash1l	KY009013	ACTTTGGCAATCGGCGTTTA	1160	234	176	316	319
Ash1l	KY009014	GCCATCTCTGGAGGTACGCT	3390	450	588	456	609
Ash1l	MGLibA_05463	GGGCATTTCCGAGGTCGACC	1903	764	754	705	802
Ash1l	MGLibA_05464	AGCCCTGTTAGTAGTGACGC	3908	589	397	522	438
Ash1l	MGLibA_05465	TTAGGACTTGGCACCGTAGT	3886	560	644	525	875
Ash1l	MGLibB_05463	ATTGTAGCCCTACTCGTAAA	1872	65	17	94	91
Ash1l	MGLibB_05464	AAGGTTTATCGGAAGCTGAC	1688	212	117	252	323
Ash1l	MGLibB_05465	GGCCGCCCAGTTTGTCAGCC	2898	580	449	600	685
Ash2l	KY009015	TCCATCTTGCTGCTTACGCT	6582	196	28	228	173
Ash2l	KY009018	GTGCCTTGGCGAATTTGACG	2764	955	566	809	937
Ash2l	KY009019	TGCTTGCTTCCGGAGAAAGT	2491	152	71	118	126
Ash2l	MGLibA_05466	TGGTTCACCGCTGACACCTT	5108	1362	1666	928	1006
Ash2l	MGLibA_05467	CTGCCACGTCAAATTCGCCA	4780	444	295	389	394
Ash2l	MGLibA_05468	GACGTGGCAGTCTCGAACAC	1924	230	106	268	288
Ash2l	MGLibB_05466	TCACGACGTGTCTATTCCAA	3252	526	203	589	367
Ash2l	MGLibB_05467	ATTGCAATGGAAGCTGTAGT	1764	261	153	240	150
Ash2l	MGLibB_05468	CAATAACATTGTCAAAACAA	669	224	114	236	131
Asxl1	KY009108	AGACTATACATACCTGACGC	3644	1129	1936	1283	2527
Asxl1	KY009109	CCCAACACCCGTCAACGGGA	1645	133	110	165	119
Asxl1	KY009110	TCCGTCCCGTTGACGGGTGT	5261	440	207	355	594
Asxl1	KY009111	AGGACTGACGATCTTCAAGC	1708	322	198	325	336
Asxl1	KY009112	CCCCCGGATCGTCCCCATCA	5221	401	276	499	483
Asxl1	MGLibA_05550	GCCAGAGGACTCCGCTGATG	3002	555	255	520	682
Asxl1	MGLibA_05551	ATGGCATTGAGGCACGCAAG	2505	451	286	506	583
Asxl1	MGLibA_05552	TGAGTGTGAAAAGACTAATG	1240	247	119	346	382
Asxl1	MGLibB_05550	ATGACCTGCAGAATCTGTTT	2364	1447	2460	1039	1532
Asxl1	MGLibB_05551	GACACCAAAACAGATTCTGC	1491	288	243	132	206
Asxl1	MGLibB_05552	CCCACAGCTTTCCACATCAG	2988	176	313	334	757
Asxl2	MGLibA_05553	GTATACACGCCCATTCTACC	2557	626	469	526	498
Asxl2	MGLibA_05554	AATGGGCGTGTATACTTTGA	2711	411	388	530	788
Asxl2	MGLibA_05555	GACAGCTCTTTCACTCCATC	3598	53	29	62	51
Asxl2	MGLibB_05553	GAGTCATAAAGAAATTCTTC	646	245	256	127	121
Asxl2	MGLibB_05554	AAGAATTTCTTTATGACTCA	1125	382	228	375	355
Asxl2	MGLibB_05555	TTTCAGAAAGATGTGCCAGA	1700	398	281	463	411
Asxl3	KY009115	AGCCCTCCAAGTCCCCCGAT	3323	739	762	708	822
Asxl3	KY009116	ACTATCTTCACTTCGATGTG	4269	272	209	255	221
Asxl3	KY009117	TGTCATTTCTTATCCCATCG	6325	409	571	438	600
Asxl3	MGLibA_05556	GAGCAGTCGGATTCGCCTTC	2578	1172	1103	1130	1357
Asxl3	MGLibA_05557	TTTGCACTGCCGTGTTCGTA	4457	802	862	691	643
Asxl3	MGLibA_05558	AGATTGCAGCCTTACGAACA	1939	1290	1232	1112	2238
Asxl3	MGLibB_05556	TTAGGATCCGAGTCTAAAAA	568	490	635	639	1176
Asxl3	MGLibB_05557	CTGCCATCTCAGCGCCATCC	5907	1446	1771	1264	1480
Asxl3	MGLibB_05558	TGCTCATCAGACACCTTTAA	2198	125	127	44	33
Asz1	KY009119	AACCTGAGTATGACCGTCTC	3294	801	792	789	781
Asz1	KY009121	TGCCCGAGACGGTCATACTC	5028	477	422	534	397
Asz1	KY009122	AACTAAAGAAATATCTCCGG	835	278	295	285	229
Asz1	MGLibA_05559	TCTTATGTATGCCGCTAGTG	4897	908	1059	875	949
Asz1	MGLibA_05560	CGGAGCCGAAGTTAACGCCC	2634	1357	1756	981	1606
Asz1	MGLibA_05561	CAACCTGAGTATGACCGTCT	5346	67	54	78	75
Asz1	MGLibB_05559	AGAGCTGGTTCGCTTCCTTT	2674	816	789	826	1678
Asz1	MGLibB_05560	ATAAGTGCTTGTTCTGCTCG	1977	484	393	474	1095
Asz1	MGLibB_05561	TCTTACCTACAAGCAGTATT	3259	211	192	167	205
Atad2	KY009128	TCTGCGGGTACCGTCGACGC	3327	826	1189	465	550
Atad2	KY009129	GACCGGGCCTCCGTAAAGCA	2037	302	245	276	360
Atad2	KY009130	CTGCTCATTCGTTTACAATA	2919	349	355	168	393
Atad2	KY009132	CGGCCCAGATTGCGCCGAGC	3054	728	611	652	917
Atad2	MGLibA_05568	ACCACAACACGCGCTCTTTA	2278	245	151	384	738
Atad2	MGLibA_05569	TAGGCAATTTGCTCGACAGC	2291	544	390	351	341
Atad2	MGLibA_05570	TTCCTCAATGAGCGAATAAC	1528	234	154	286	238
Atad2	MGLibB_05568	ACCTTAAAGAGCGCGTGTTG	2219	536	448	315	416
Atad2	MGLibB_05569	TCGTGCAAATGTTCTGCAGT	3815	405	479	320	395
Atad2	MGLibB_05570	TGAAAAAGATGCGCAGACAG	1047	452	486	468	731
Atad2b	KY009133	CCGCTCCTCTAAGACGCGCG	1927	803	651	543	586
Atad2b	KY009134	CGGCTGTTTCAAAGTGCGTT	1706	455	602	303	431
Atad2b	KY009135	TCAGAAAAAGTTGTCGGTCC	2086	389	557	267	363
Atad2b	KY009137	CCATCATATTCACGCTTTGA	5257	1267	1753	1005	1236
Atad2b	MGLibA_05565	ATCCGACGAAACCGTCGATC	1697	288	282	381	836
Atad2b	MGLibA_05566	TCTCTACTTCGCCTGATCGA	6876	1568	1597	1513	2644
Atad2b	MGLibA_05567	CACAAGCTACTATGTCCGTT	3843	236	357	179	261
Atad2b	MGLibB_05565	TGTTTCAAAGTGCGTTTGGC	5748	302	262	241	145
Atad2b	MGLibB_05566	GGCGACCTTTCATGTATAAA	799	1423	1655	1028	1271
Atad2b	MGLibB_05567	CTTCGAAGCCACCCCCTTCG	7235	925	944	808	847
Atf7ip	KY009199	TGAACCGGTCGCAAGGGTCG	3170	886	415	748	1058
Atf7ip	KY009200	GCCGCCACGACCCTTGCGAC	5814	917	669	988	1010
Atf7ip	KY009201	AGACTGTGAATCACCGGAGG	1588	240	137	210	304
Atf7ip	KY009202	TCGAGAGCAGGCTCAGCGAT	1992	254	53	392	409
Atf7ip	MGLibA_05610	CCGTACGTACTTCTCACAGG	4571	590	485	606	751
Atf7ip	MGLibA_05611	TCCAAAACGTTTGGTTAACC	1605	488	259	632	495
Atf7ip	MGLibA_05612	GGCAGTGCTCACCGAGCTGC	4528	234	223	212	403
Atf7ip	MGLibB_05610	TGCTGTGTTTGATAAGACGT	3441	921	869	1146	1668
Atf7ip	MGLibB_05611	ATTCTTCATCCATATATCGC	3252	737	500	233	384
Atf7ip	MGLibB_05612	AGAGGAGCGAGTTCCAGCCG	1639	491	676	388	1015
Atp6v0c	MGLibA_05868	ATGCTCACCGCTGAAGACCA	2673	43	10	75	28
Atp6v0c	MGLibA_05869	TGCGATGCCAGTGCCACTCT	8261	357	52	1014	728
Atp6v0c	MGLibA_05870	ACAGCCATGGGAGCCGCCTA	3105	182	83	358	187
Atp6v0c	MGLibB_05868	CATGGGCGCCTCGTCCGCCA	4741	79	25	158	66
Atp6v0c	MGLibB_05869	AAAAGGACTACTTTGTGGAG	656	147	91	307	122
Atp6v0c	MGLibB_05870	GGCCTGAGTGTGGGGCTGAG	2314	139	100	317	357
Atrx	KY009736	TCATCTGAATTCGACATTGC	4760	122	49	97	41
Atrx	KY009737	CTTTCTGTCTGTCGCCTCAA	6019	410	399	365	620
Atrx	KY009738	ACGTGGGGATCTTCGAAGAT	1551	316	165	333	386
Atrx	KY009739	ATCAAGGAGACGGCAACAGT	1257	913	460	1161	1293
Atrx	KY009740	GACAATCTCAAAAAACGCGG	768	428	453	433	627
Atrx	MGLibA_05976	CTTTGGTTCATGACAAGTCG	2457	982	1178	750	1023
Atrx	MGLibA_05977	TTCATTTACATTCTCATCCG	6800	194	61	266	290
Atrx	MGLibA_05978	TGGAAACAAGTTGAGTACAT	1572	592	311	634	1149
Atrx	MGLibB_05976	TGGACTTAATTCTGATATGA	2229	1583	1211	1282	1855
Atrx	MGLibB_05977	ACTATGCAAAGCTTGCCAAA	1038	397	390	480	605
Atrx	MGLibB_05978	CCTTGATGAACCTGAAGATC	2542	171	71	243	246
Aurka	KY009830	TGGAGATCCAGTCGCACCTG	4454	137	90	128	31
Aurka	KY009831	ACAGCTGGAGAAGGCGAACG	1306	119	54	188	244
Aurka	KY009832	AGAAGGACACAGGACCCGCT	1499	119	24	337	741
Aurka	KY009834	CTTCGGTCCGAAACGCGTCT	3629	383	177	571	403
Aurka	MGLibA_06024	TCAGTCACCAAGACGCGTTT	3101	494	312	590	634
Aurka	MGLibA_06025	CCACTCACCGCAGGTGCGAC	3612	62	10	100	69
Aurka	MGLibA_06026	GACCACTTACCGGAGGCTGC	2373	566	281	627	414
Aurka	MGLibB_06024	CGAACGTGGAGCACCAGCTT	2717	114	13	322	398
Aurka	MGLibB_06025	ATTCTGTACCTTAACAGGCC	3342	131	85	250	212
Aurka	MGLibB_06026	GTAAAGAAAACTGTGTCTCC	1316	285	250	376	336
Aurkb	KY009840	GAAGAAGAGCCGTTTCATCG	1426	728	208	858	403
Aurkb	KY009842	TCCTGGAATACGCCCCTCGC	6874	61	26	115	31
Aurkb	KY009843	CCTTGTAGAGTTCCCCGCGA	3818	242	172	267	328
Aurkb	MGLibA_06027	TCCTTGTAGAGTTCCCCGCG	4376	262	80	425	220
Aurkb	MGLibA_06028	TTTCGATCTCTCGGCGAAGC	2356	370	299	297	589
Aurkb	MGLibA_06029	CGATGAGCAGCGGACTGCCA	1826	216	21	252	148
Aurkb	MGLibB_06027	TCGCCGAGAGATCGAAATCC	1849	188	77	248	172
Aurkb	MGLibB_06028	GAGAGCAAGCGCAGATGTCG	1842	122	22	170	55
Aurkb	MGLibB_06029	CAGGGCTCCACTGCCTCGCA	3174	495	391	515	803
Aurkc	KY009845	GGACCAGCAGCGTACAGCCA	2147	709	409	417	445
Aurkc	KY009846	TTTGTTCTCACAGATAATAC	1470	428	524	324	317
Aurkc	MGLibA_06030	TCACCGTGGCTGTACGCTGC	8474	244	189	367	327
Aurkc	MGLibA_06031	CACTCACCTGGTTGAGGTGC	3660	312	432	306	324
Aurkc	MGLibA_06032	TTCCTTAGCTACTGGCCAGA	2945	269	342	358	409
Aurkc	MGLibB_06030	AGGCTTACTGTAGGTGTGCC	2045	591	819	555	587
Aurkc	MGLibB_06031	ACCATCAATGACTTTGAAAT	1812	1857	1604	1752	3425
Aurkc	MGLibB_06032	ACTACTTCTATGATGACACT	3184	1001	1115	815	1140
B2m	KY010010	TCACGCCACCCACCGGAGAA	3054	481	844	555	639
B2m	KY010011	CACGCCACCCACCGGAGAAT	3389	994	1374	672	901
B2m	KY010012	TTCGGCTTCCCATTCTCCGG	9090	730	714	1037	1627
B2m	KY010013	GGATTTCAATGTGAGGCGGG	1418	779	629	838	832
B2m	MGLibA_06111	AGTATACTCACGCCACCCAC	3787	646	432	584	431
B2m	MGLibA_06112	AGTCGTCAGCATGGCTCGCT	2458	684	1101	667	1357
B2m	MGLibA_06113	CCGAGCCCAAGACCGTCTAC	4111	1444	1443	1440	1259
B2m	MGLibB_06111	CTGGTGCTTGTCTCACTGAC	4200	384	372	186	671
B2m	MGLibB_06112	ACGTAGCAGTTCAGTATGTT	4413	520	363	600	680
B2m	MGLibB_06113	CGTATGTATCAGTCTCAGTG	4847	1048	1092	726	990
Bahcc1	KY010265	CCCTCTGAGCCGGCCTACCG	3639	616	520	539	571
Bahcc1	KY010266	GAAGGCTCCGTTCGTGGGCC	2735	422	431	568	577
Bahcc1	KY010267	AGGCAGCCTCGATGCGGTCC	3785	956	577	821	784
Bahcc1	KY010268	CCCGTCTGTACACCCCACGG	5015	940	1405	886	1373
Bahcc1	KY010269	CCCAGGGAGGAACGTCCTTG	1986	929	748	1142	1233
Bahcc1	MGLibA_06492	CGAGACGAAACGCAAGTCCG	2456	528	372	587	602
Bahcc1	MGLibA_06493	ACCGACCATGGTGCACCCTA	4001	482	581	389	312
Bahcc1	MGLibA_06494	TGTAACAGCAGCTCACGTCC	3690	682	463	655	1346
Bahcc1	MGLibB_06492	TCCTCGGTAGGCCGGCTCAG	4188	462	459	333	352
Bahcc1	MGLibB_06493	TCTAGCGCATGGCTGGCACG	2959	99	95	167	435
Bahcc1	MGLibB_06494	GATCCAAGTGGCTCACGGGT	1242	737	633	665	767
Bahd1	KY010270	CCCATTGCGCAAACGTTCAC	2370	735	647	686	962
Bahd1	KY010271	GAGTCCGACCTCGTCCAGTG	4047	926	1679	673	1231
Bahd1	KY010272	GCGGGGACCCTCACCGTAGC	1784	383	1115	348	601
Bahd1	KY010273	TGAGCACGAGAAGGTCGAAG	1708	279	207	258	588
Bahd1	KY010274	GAGGCAGGTTGGGGCGCAAC	2736	446	402	213	185
Bahd1	MGLibA_06495	CCGAGATGGGCGTCTGAAGA	1553	442	484	473	758
Bahd1	MGLibA_06496	TGCCATCCGAAAGAGTTACC	3550	1322	1314	1077	1946
Bahd1	MGLibA_06497	TTACAGGCCTGAGCACTTAC	5023	827	628	636	904
Bahd1	MGLibB_06495	CAGAGCGCCAAGCCTCCGAG	1651	644	746	558	1218
Bahd1	MGLibB_06496	AAAGACGTCTACACCTTATG	1895	242	273	372	487
Bahd1	MGLibB_06497	ATAGCACTTCTCTTCAATGC	3689	334	347	358	1024
Baz1a	KY010378	TCTGCTCCTTTTATGCGATC	5333	956	1008	996	2546
Baz1a	KY010379	TTATGTTGATGTGTTGCGAC	3271	1195	1278	1503	3371
Baz1a	KY010380	CTTCCTCGTCGCCTGTTAGC	7264	1371	1332	1234	2090
Baz1a	KY010381	CCTCCCAAACGAATATCTTT	2207	177	174	216	370
Baz1a	KY010382	GCTTCCTGATACGTCAGTCC	5006	587	761	295	354
Baz1a	MGLibA_06570	TGTGCCGTGACGGGTAGACC	5303	209	231	282	452
Baz1a	MGLibA_06571	GCAAGCGTGAACGACGAGTA	1755	253	245	374	653
Baz1a	MGLibA_06572	CATCAGCGACAGTGACGACT	3341	569	759	651	1303
Baz1a	MGLibB_06570	GCAAAACCATTCTGATGTAA	1635	241	187	348	376
Baz1a	MGLibB_06571	AACCCTGTATCTGAATAATA	1279	1094	1827	964	1682
Baz1a	MGLibB_06572	CAACACTGTGAAGCACAAGA	1283	669	832	402	731
Baz1b	KY010383	CATGACCAAATATGCCGTGG	2728	131	167	113	149
Baz1b	KY010385	AGCAGACAGCTTGATTCGAA	1236	345	194	195	139
Baz1b	KY010386	AGATACTTCGATACTTTATT	2110	297	264	73	126
Baz1b	KY010387	CACTTGGAGAAGTCGTTAAA	1355	207	197	282	171
Baz1b	MGLibA_06573	GACTAGATGACAGAGCGCGT	1055	117	185	107	79
Baz1b	MGLibA_06574	GATCATGACCAAATATGCCG	1227	111	117	160	169
Baz1b	MGLibA_06575	AGAGTCGACAAGCTTCTCTA	1238	391	204	351	465
Baz1b	MGLibB_06573	AAAGATACAGTGAACGCATT	1286	1561	1419	1185	1556
Baz1b	MGLibB_06574	GATAGTGAAGATTCATCCTT	1256	235	130	269	392
Baz1b	MGLibB_06575	TGCGTTCACTGTATCTTTCC	7145	383	323	350	320
Baz2a	KY010388	GGGGGACAATACCCGCTCAA	2	1459	2319	1089	1346
Baz2a	KY010389	CCCGCTCAACGGTATCCTTG	4699	232	414	157	251
Baz2a	KY010390	CACAACACTAATCTTCGAGC	1598	130	196	164	200
Baz2a	KY010391	GACAGTCGTAGGCCACGTTA	2661	1534	1805	1619	2702
Baz2a	MGLibA_06576	TCTCGATCAGCACGCGCTTT	6454	182	80	473	1496
Baz2a	MGLibA_06577	GGGGCTTAACTTCGATTCAC	1214	406	353	461	782
Baz2a	MGLibA_06578	AAGGTTGTCGGTTGCCCCCA	4059		0		2
Baz2a	MGLibB_06576	GCTGATCGAGAAGAGACGAC	1219	155	97	141	231
Baz2a	MGLibB_06577	ACACCAAGAAGTCTCCGTCC	2476	693	745	657	1818
Baz2a	MGLibB_06578	AAGACAGACTCCCCTAAGAC	1151	791	1072	811	1451
Baz2b	KY010392	GTTCCTCTCAACAGCGATAA	1159	1016	950	862	866
Baz2b	KY010393	GGATGTCATTCCTCGTATCA	3010	178	138	215	377
Baz2b	KY010394	GCACCATCACCCCCATCCGG	3919	805	619	728	993
Baz2b	KY010395	CCGTTTGGATCGCAATTCAC	4665	754	582	691	827
Baz2b	MGLibA_06579	ACGATTCGTCATTCCATTCG	4288	256	178	289	284
Baz2b	MGLibA_06580	TCGTCAGACACCTCGAGTGA	2912	760	809	794	1338
Baz2b	MGLibA_06581	GACGAATCGTGATTCTGGGC	1918	110	84	132	308
Baz2b	MGLibB_06579	GCTGCTAATGCCTTCACTCG	4055	561	546	621	1692
Baz2b	MGLibB_06580	AGCCGACAGAATCAAAGATA	542	901	1004	813	893
Baz2b	MGLibB_06581	GTATCACCTGACTCAGTGTC	4428	639	839	439	493
Bcor	KY011056	CACGAGGAACTCCGCTGTTG	3991	1009	1365	704	1250
Bcor	KY011057	GGATGTAGAGAACTCGCTAT	1630	779	830	633	795
Bcor	KY011058	CTGCCAGGCCATCGATCCGA	4943	388	588	313	444
Bcor	KY011059	AGGACCCAACCCTCCGTAGC	2331	672	1013	655	688
Bcor	MGLibA_06753	GATGAGGCCGAATCCAACGA	1294	406	602	242	245
Bcor	MGLibA_06754	CTTACGGGCTGCATACGAGC	2296	260	403	230	342
Bcor	MGLibA_06755	CGACGCTTCAAAAGCCAGGC	1656	389	343	409	785
Bcor	MGLibB_06753	CTGTGAACGTTCCCATACAG	3202	291	495	183	288
Bcor	MGLibB_06754	GAAGCGTCGCCATCATTCAC	3576	335	313	204	314
Bcor	MGLibB_06755	ACAGCTGGATGAACAGCGAG	869	1306	1535	1317	3030
Bmi1	KY011379	ACAAATAGGACAATACTTGC	1010	171	145	91	100
Bmi1	KY011380	ACTGTCTTTATAGCTGCCAA	1781	407	371	392	2067
Bmi1	KY011381	TTCTCTCTCTTAGATTGGAT	3479	251	196	285	514
Bmi1	MGLibA_06966	GCAGCTCACCCGTCAGCTGA	3178	385	417	241	273
Bmi1	MGLibA_06967	AACATGTATTGTACGTTACT	2805	727	604	773	1141
Bmi1	MGLibA_06968	GCACTTCCTACCTTATGTTC	5231	670	1116	760	1673
Bmi1	MGLibB_06966	AATGGCTCCAATGAAGACCG	1202	646	572	410	669
Bmi1	MGLibB_06967	TTGAGTTCTTTGATCAGAGC	2084	697	860	570	512
Bmi1	MGLibB_06968	CAAAATTTACCATCAGCTGA	1511	266	203	167	309
Bptf	KY011619	CAAAAGCAGTGGACTTCGAT	1616	227	222	147	241
Bptf	KY011621	TTTGTTCTCCACTGGTCCGT	10916	271	244	237	307
Bptf	KY011622	ACCTGCCCCGACTGCTGCCG	6663	244	137	380	195
Bptf	KY011623	GACCCAGGATTCCGAGGACG	1394	424	409	306	349
Bptf	MGLibA_07131	TACGTTCGACACGAACCTAT	3275	159	61	196	336
Bptf	MGLibA_07132	AATAGGTTCGTGTCGAACGT	2225	253	207	277	216
Bptf	MGLibA_07133	GACCTGACCAACAAGGCTCG	1336	1820	997	1984	1711
Bptf	MGLibB_07131	AGTCTATTAGCTCTGCTAAC	2102	946	506	1045	981
Bptf	MGLibB_07132	CTCGTATCATCACCAGACTG	2972	212	48	157	42
Bptf	MGLibB_07133	GGACTCGGAAACTTCTCCAT	2385	808	690	786	700
Braf	KY011624	ACCAACTGATGCGCTGTCTT	3923	1435	1946	1219	1627
Braf	KY011625	AAGATCATCGCAATCAGTTT	2782	562	324	452	457
Braf	KY011627	GGCCGGGTCCGCAGCCGAAG	1861	986	1016	908	980
Braf	MGLibA_07134	TCATAGGTACCCGCAAGATG	2178	918	1549	802	1016
Braf	MGLibA_07135	GAGGCCCTATTGGACAAATT	1493	258	365	190	344
Braf	MGLibA_07136	GTTGTTCCGTGATGCATCTG	5765	450	633	306	312
Braf	MGLibB_07134	GCAAATGATTAAGTTGACAC	1057	443	265	506	455
Braf	MGLibB_07135	TCTTCCTGCCCAACAAACAG	2994	1297	1505	1431	1828
Braf	MGLibB_07136	CTTGCTGGTGTACTCTTCAT	4975	759	841	682	1119
Brca1	KY011632	AGGTTAAGCGCGTGTCTCAA	3967	1186	1229	988	996
Brca1	KY011633	AACCCCAAGGAACTCGTCCA	4489	808	407	811	515
Brca1	KY011634	AAGTTTCAAACGAAGTGGAT	1533	547	534	539	470
Brca1	KY011635	GGCATTTCCAGGTTCGACCT	6237	751	517	790	758
Brca1	KY011636	GCGTCGATCATCCAGAGCGT	4761	472	170	508	209
Brca1	MGLibA_07143	GGCGTCGATCATCCAGAGCG	3974	698	364	738	560
Brca1	MGLibA_07144	GCTACCGGAACCGTGTCAGA	4711	907	626	671	438
Brca1	MGLibA_07145	GTTATCTCATTCTTACACAA	3367	483	453	235	165
Brca1	MGLibB_07143	ATTGTGAAGGCCCTTTCTTC	5893	699	139	738	399
Brca1	MGLibB_07144	TCTGATTTCAGGAGCCTACA	5190	974	143	804	415
Brca1	MGLibB_07145	TCACTTACTTGCAAAATATG	3911	610	381	512	442
Brca2	KY011637	ACAGCTGTGGTTCATAACCG	2255	115	72	79	57
Brca2	KY011638	GAGCCACTTGACGAGACTTT	963	603	467	413	769
Brca2	KY011639	AGATTTCTGGTTCTACGCTT	1804	798	423	875	781
Brca2	KY011640	TGTTTTAAGTACCGCTTCTA	2769	411	140	397	609
Brca2	KY011641	ATGTACCCAATATGCGAGAG	1427	193	65	82	63
Brca2	MGLibA_07146	TAGGACCGATAAGCCTCAAT	2794	194	112	174	192
Brca2	MGLibA_07147	AAAGCTCCTCAAACCAATTG	658	244	169	253	258
Brca2	MGLibA_07148	GGACTAGCAACATCTACCAC	1430	565	326	498	1183
Brca2	MGLibB_07146	TGTGTGCACCGCAGAGTAAG	3137	766	575	697	1246
Brca2	MGLibB_07147	GTACTACAACGAGAAAAGCC	620	222	188	254	196
Brca2	MGLibB_07148	TCACTGAGACAAGATTTCAG	1647	217	79	225	110
Brd1	KY011648	ACGGAGCGCACACGGTCGGC	2278	807	574	695	727
Brd1	KY011649	ATGTTCCTCACACCGTCAAT	4240	610	329	670	770
Brd1	KY011650	ACAGCACGCAATCCGCAGGG	2431	557	333	711	805
Brd1	KY011651	TACTCCACAATCCGCACCTT	4369	643	577	394	358
Brd1	MGLibA_07152	ATTAAATAGGATTGCGAATC	1219	536	352	558	514
Brd1	MGLibA_07153	TGCGCAGCAGCTCAATTAGC	3717	710	277	798	772
Brd1	MGLibA_07154	TAATTGAGCTGCTGCGCAAG	4051	445	356	439	501
Brd1	MGLibB_07152	TGGACTGGAGCCGCCGCAAC	4775	977	670	920	600
Brd1	MGLibB_07153	AGCGACCCATCGCAGCCCCT	3758	88	42	103	107
Brd1	MGLibB_07154	GAGCGTAGCAGCACAGTTAG	2061	1002	538	1095	1201
Brd2	MGLibA_07155	AGTTGGTTTGTTACCCGTCC	3290	624	481	575	649
Brd2	MGLibA_07156	GGGCACTGGTAATACTGCCC	2688	587	611	802	901
Brd2	MGLibA_07157	CAGTATTACCAGTGCCCATC	4375	716	503	531	412
Brd2	MGLibB_07155	CACCGATGATATTGTCCTAA	3500	135	103	128	192
Brd2	MGLibB_07156	AGTAGCATCCATGCCACAAG	958	136	58	98	84
Brd2	MGLibB_07157	GCAGGGGCCAGTTGTAAAGC	1333	517	454	244	353
Brd3	KY011652	CTTGTAAAAGGGCCACGCAT	2283	1128	1171	966	1525
Brd3	KY011653	CCTTTTTACCCGCGTGCTGT	6025	1461	1400	1071	1217
Brd3	KY011654	GCCAGTGGACGCGGAGGCGC	5194	475	328	364	257
Brd3	KY011655	GGGACGATGGGTGTCGCAGG	1649	577	752	348	279
Brd3	KY011656	ACAGGGGTAGCGGCAATGAC	2054	223	109	162	223
Brd3	MGLibA_07158	CACGGGGATCCCGGCAGTCC	5002	1142	1254	1105	1529
Brd3	MGLibA_07159	AGTCTTTCGCCCGGGCTTGC	2838	756	769	540	844
Brd3	MGLibA_07160	TCCCACACCGCCTGTAGTCA	7105	572	501	440	535
Brd3	MGLibB_07158	ACTATTGCCCCCTGCTCCAA	2874	1629	2045	1569	2008
Brd3	MGLibB_07159	ACACGGTGGGGGGTATGTTC	4159	460	599	324	490
Brd3	MGLibB_07160	CACAGATGATATAGTGCTAA	841	342	309	325	420
Brd4	KY011657	GGACCCAGCTTGGCGGTCTT	2564	118	54	131	122
Brd4	KY011658	GAGCCCAAGACCGCCAAGCT	1754	611	1886	424	840
Brd4	KY011659	CTGGGGGGTGGTCGCAATGA	2137	170	84	181	92
Brd4	KY011661	TATGGAAACACCAGTTTGCG	2156	360	237	398	492
Brd4	MGLibA_07161	GGGCCTGCGTTGTAGACATT	2324	238	56	501	1086
Brd4	MGLibA_07162	GCTGGAAAGGCCACGCAAAC	1516	310	281	423	393
Brd4	MGLibA_07163	GGGGTGGTCGCAATGATGGG	1772	154	55	180	120
Brd4	MGLibB_07161	AACTGAGATCATGATAGTCC	1892	137	39	158	238
Brd4	MGLibB_07162	ACCGGTGAAGGAGTCTGAAG	1312	194	136	124	67
Brd4	MGLibB_07163	ATTAAGACGATGTCATCTCC	3035	91	30	118	62
Brd7	KY011662	GCAGATTGAGCGCGTTGTCC	5290	269	286	268	322
Brd7	KY011663	ACCTTTTATTGTCCTTAGCG	3391	468	354	421	651
Brd7	KY011664	CGGCTGCTGGCAGCGCGAGA	850	687	634	663	823
Brd7	KY011666	GTGACGGATTTTATTGCGCC	4864	801	790	843	857
Brd7	MGLibA_07165	CCTCGCTCCCCCCGACTTTG	8419	121	71	170	273
Brd7	MGLibA_07166	CCTCAAAGTCGGGGGGAGCG	1512	362	283	288	388
Brd7	MGLibB_07164	ATCTTATAGGGACATGACAC	1837	1877	2229	1619	2546
Brd7	MGLibB_07165	TCGAGACCGTGCAGAGAATG	2891	584	473	466	508
Brd7	MGLibB_07166	CCAGTCCATAGAAGAACTAA	738	199	157	147	215
Brd8	KY011667	GGGGTACTCGGCAAAGTCCC	1171	1021	884	606	1036
Brd8	KY011668	ATCACAGTCGGTAACCTTCG	2501	229	53	195	173
Brd8	KY011669	ACAGTCGGTAACCTTCGAGG	2265	367	189	439	455
Brd8	KY011670	CTCACCCTGGTACGCAGCAT	4772	287	125	270	138
Brd8	KY011671	GTTTTCCACAGACGGAAACG	981	46	17	105	112
Brd8	MGLibA_07167	ATCAAGCCCTTTGCAGAACC	3223	1073	1612	924	928
Brd8	MGLibA_07168	GAGCACAAGCTGCTGAGTAC	1922	217	91	340	562
Brd8	MGLibA_07169	ATGCTAAACACAACTTCTCT	1651	114	90	165	163
Brd8	MGLibB_07167	AGAACTGAAGAAAGTCATAA	428	167	98	277	257
Brd8	MGLibB_07168	AGGCCGGCCAGGTTCTGCAA	2127	31	14	99	108
Brd8	MGLibB_07169	GTTTAGCATCTTCTGTCATG	5560	272	203	355	439
Brd9	KY011672	CGATCGCTCAGACCACGAAC	1983	659	273	638	941
Brd9	KY011673	CTTGCCTGGCTGTGTTCGGC	3954	203	161	227	569
Brd9	KY011674	GGAGCAATTGCATCCGTAAC	1570	216	202	306	356
Brd9	KY011675	GCCAAGAAGATCCTGCACGC	3362	501	253	361	210
Brd9	KY011676	TCATCTTAAAGCCCGCGTGC	4564	479	652	496	318
Brd9	MGLibA_07170	TGAGCGATCGTCGTAGTAGC	3229	293	183	269	108
Brd9	MGLibA_07171	ACGATCGCTCAGACCACGAA	1376	601	365	516	315
Brd9	MGLibA_07172	GAGGCTGATGCTTTCGACCC	2788	373	209	430	319
Brd9	MGLibB_07170	GAAGGAACACTGCGACTCAG	1623	245	89	272	234
Brd9	MGLibB_07171	TTCATCGTGCCAAAGTCCAT	3972	832	398	998	986
Brd9	MGLibB_07172	ACGAGAGCACACCTATCCAG	2159	316	451	255	416
Brdt	KY011677	TTGGCCTTTCCAACAGCCGG	2391	372	247	318	405
Brdt	KY011678	AGAGAAGCCGTGCTTCCACA	1201	1400	1278	1245	1684
Brdt	KY011679	GCGTCCACCGGCTGTTGGAA	1614	270	231	162	163
Brdt	KY011680	TCACGGCGTCCACCGGCTGT	5484	471	279	483	806
Brdt	KY011681	TTTAGTTTCACGGCGTCCAC	5057	341	274	324	1162
Brdt	MGLibA_07173	AAAGACATTCTCTGCCGCTT	2385	386	304	333	421
Brdt	MGLibA_07174	GATCTGTGACTCGCAGTCTC	3200	296	565	274	455
Brdt	MGLibA_07175	ACAATAGCTGTTTGTCGACT	1949	382	333	383	692
Brdt	MGLibB_07173	CTCTTGGCCTTTCCAACAGC	2245	248	334	197	95
Brdt	MGLibB_07174	GCCACAAGAAGAGCAAGTTG	1700	263	329	296	339
Brdt	MGLibB_07175	AAACTGCTACTTATACAACA	951	902	1102	894	976
Brpf1	KY011727	AGATGCTGATTCGGTGGACA	1310	1161	2682	918	3467
Brpf1	KY011728	TGGGCCGGGGTGGTGCGTCA	3338	936	923	722	1501
Brpf1	KY011729	GTGGTGGTCTTACCGGTAGT	2471	141	122	149	92
Brpf1	KY011730	GGCTGTCTTGCGGACGCTAA	1979	758	669	502	1140
Brpf1	KY011731	TTTGTAGGCGCCTGAGTAGT	4691	489	602	454	1138
Brpf1	MGLibA_07221	TGTCTTGCGGACGCTAAAGG	3064	423	545	339	896
Brpf1	MGLibA_07222	CCAACCGCCTGACCATCCAG	5172	711	1046	657	1441
Brpf1	MGLibA_07223	CTGAAACGACAATCACGGAA	730	237	306	177	419
Brpf1	MGLibB_07221	TTGGCACCTGTCTCCCGCAC	8548	1724	2520	1413	5536
Brpf1	MGLibB_07222	CATCCTCCTCCGAAAAACCT	2223	384	271	407	639
Brpf1	MGLibB_07223	CGAGCCGGTCCCTCTGTCTG	7981	1572	1660	1763	3867
Brpf3	KY011732	TCGCAAGACTGCGTATTGTG	5382	33	43	62	73
Brpf3	KY011733	GGAGGTACCGGACGCATGCT	1470	948	755	650	935
Brpf3	KY011734	TCCAGATGGCGCAGACTACG	3569	1492	1318	1387	2131
Brpf3	MGLibA_07224	TGATCGAGCTCATCCGCAAA	2507	734	974	640	983
Brpf3	MGLibA_07225	GGAACGGTGTCCCCCTCATC	3461	622	477	515	987
Brpf3	MGLibA_07226	GTCCTCAACAGGACCGTAAA	324	711	503	690	713
Brpf3	MGLibB_07224	CTTGCCCGAATCACCCAGAT	3061	1274	2048	1079	1756
Brpf3	MGLibB_07225	ACCGAGCAGCTGTCCGCCTC	7278	761	493	490	506
Brpf3	MGLibB_07226	GCAGAAACTTCGCCATGACC	3790	288	495	270	147
Brwd1	KY011751	CCCTCCCAGTCCAACCTCTT	6757	454	458	294	272
Brwd1	KY011752	CAACAGGAGCTACGAGGAAT	1223	1424	2012	1419	2799
Brwd1	KY011753	CGAGCACAACAGGAGCTACG	1425	239	249	92	116
Brwd1	MGLibA_07236	ACCGGACGTCGGGCCGGCGA	2032	721	391	658	923
Brwd1	MGLibA_07237	CGCCATGGCGGAGCCTTCGC	4035	348	406	227	165
Brwd1	MGLibA_07238	CGGCACTCACCTGCGCCGCT	1761	394	583	282	378
Brwd1	MGLibB_07236	ATCGCCCGCTACCTCTCAGC	5353	324	329	312	323
Brwd1	MGLibB_07237	CATTCCAGCTGTTGCCGAAG	2280	822	589	719	785
Brwd1	MGLibB_07238	GGGAGGGCAACGAGCACAAC	1021	198	190	168	195
Brwd3	KY011756	CAATTTGGCCACTACGCCGA	3416	526	729	596	725
Brwd3	KY011757	TGAGGGGCCGATAATCGGTA	1989	421	375	371	484
Brwd3	KY011758	ACTACATCCGGTTAATTGCC	2443	984	836	798	675
Brwd3	KY011759	TAGCCTTTGATCGAAGCGGG	1717	1403	1815	1530	4605
Brwd3	MGLibA_07239	AGCTGTATTACCTGATCGCA	2902	392	449	493	567
Brwd3	MGLibA_07240	TGATTCCGCGCCGCTTAGAC	7742	453	528	512	471
Brwd3	MGLibA_07241	CACCTGAGCGGATTTGTTAC	2374	486	409	431	719
Brwd3	MGLibB_07239	AGAGCACCGAAGAAGCTTCG	788	524	990	210	1022
Brwd3	MGLibB_07240	CCTAGTAATGTCTGTACCCC	5621	347	455	175	377
Brwd3	MGLibB_07241	GCAAGAGCTCGAAGAGCATC	1061	149	147	92	73
Btg3	KY011892	CATCCAAAGGTCAGGCCTAC	2861	95	60	156	248
Btg3	MGLibA_07329	GCGGGTCTTACCTGGTACAC	2691	649	716	573	792
Btg3	MGLibA_07330	AACACCAAGCCCCGTGTACC	3892	918	975	917	1256
Btg3	MGLibA_07331	TTACCTGTAGGCCTGACCTT	4656	358	359	444	425
Btg3	MGLibB_07329	CACCGGCAGCACACCTCACA	5397	473	398	335	484
Btg3	MGLibB_07330	AAAAATGAAGAACGAAATTG	613	717	549	608	690
Btg3	MGLibB_07331	CTGCATCTTGTACAGCGACC	2560	1219	1420	1048	1819
Btla	KY011903	AACAATCTGTGTACCCCTTG	3591	1157	1637	989	1190
Btla	KY011904	GCCCTCAGCTATACACTAGT	2135	1024	885	1004	1191
Btla	KY011905	CCCTCAGCTATACACTAGTT	2336	640	599	580	570
Btla	KY011906	GGAAGAAAATCAATCAGTTC	819	427	302	343	769
Btla	MGLibA_07338	CAGTGCAACTTACTATTACG	2605	152	83	126	112
Btla	MGLibA_07339	CTCGTAATAGTAAGTTGCAC	2101	612	434	534	722
Btla	MGLibA_07340	AAGAATTCCCTAAATAACCG	1709	1020	2071	531	714
Btla	MGLibB_07338	CCAGATGCCACCAATGCCTC	3840	95	59	122	133
Btla	MGLibB_07339	TAAAGCAGCCAAGTCCTGCC	3766	1251	1239	911	1213
Btla	MGLibB_07340	TCTTAGTAGCTTTCTCACAA	2463	896	1114	594	897
C920025E04Rik	MGLibA_07599	ATTTCCACACCGTCGTATCC	5001	480	347	548	1061
C920025E04Rik	MGLibA_07600	TGGTCGCGGTCCAGGAGCGC	5750	460	751	535	461
C920025E04Rik	MGLibA_07601	GAGGCCGGGCCGGGATACGA	1973	318	167	327	351
C920025E04Rik	MGLibB_07599	GCTCCATACATACCTACAGC	3703	109	45	200	98
C920025E04Rik	MGLibB_07600	AACAGCAATGATTACCATGT	2768	666	827	627	930
C920025E04Rik	MGLibB_07601	ACATGGAGTTTGTGGAGACC	2763	1084	852	1201	1270
Caprin2	KY012859	CAAATGGCCAAGTCCTGACG	2800	88	121	231	279
Caprin2	KY012860	CCTGGGAAGCAGATTATGCT	1870	159	105	65	80
Caprin2	KY012861	ACAAGTTCCGTAAGAGATTC	1242	737	812	742	738
Caprin2	KY012863	TAGGAACATCGAGAAGAAGA	741	314	247	403	353
Caprin2	MGLibA_07968	CAACTACTTACCAACTGGTC	2697	609	659	451	610
Caprin2	MGLibA_07969	TATAAAGATCGCCTTAAAAA	503	566	481	452	621
Caprin2	MGLibA_07970	ACAAGGATGACTGCTCCATC	3148	2118	2005	1657	2535
Caprin2	MGLibB_07968	TCAGCATATGCTCCCTTCTC	9058	249	156	198	180
Caprin2	MGLibB_07969	GCTGCTGAAAGCGCAGAAAA	469	70	41	38	47
Caprin2	MGLibB_07970	AGCAGTCATCCTTGTACTTT	3586	722	814	565	750
Carm1	KY013004	GCAGCAGGCGCTGCGCCTTG	2688	184	78	266	179
Carm1	KY013005	GGTGCGCGCCGGACCAGACG	1715	303	112	273	172
Carm1	KY013006	CGCGCCGGACCAGACGCGGC	1852	376	171	427	284
Carm1	KY013007	GGTTCTGCAGGATCGCACGC	2498	210	212	218	136
Carm1	MGLibA_08061	CGTTCGCGTCGCCGATAGTG	2372	350	147	308	259
Carm1	MGLibA_08062	CTCACTATCGGCGACGCGAA	2178	1361	643	1168	1126
Carm1	MGLibA_08063	CTGCAGGATCGCACGCTGGT	1765	671	170	600	1051
Carm1	MGLibB_08061	TGAGGACGCTGTTGCAGCCC	4353	518	284	511	586
Carm1	MGLibB_08062	CCTTGTCCTTGAAGTCCGTG	7248	199	21	193	168
Carm1	MGLibB_08063	ATCCAGTTTGCCACACCCCA	4008	604	175	667	1181
Cbx1	KY013284	AGGTGGAATATCTTCTAAAG	631	193	158	122	70
Cbx1	KY013285	GAATATCTTCTAAAGTGGAA	393	272	216	247	261
Cbx1	KY013286	CATGAGACAGATAAGTCAGA	1075	385	393	220	803
Cbx1	KY013287	GAAACTCAGCAATAAGGTCA	1379	29	5	38	37
Cbx1	MGLibA_08238	GTAGCTCCAATAATCCGCTC	1848	417	328	290	368
Cbx1	MGLibA_08239	TTACAGTCAGAAAAGCCACG	1412	266	200	351	455
Cbx1	MGLibA_08240	AACCTGTGGGCACTTGACAT	3267	85	171	85	77
Cbx1	MGLibB_08238	GTTTCAGTGAGGACAACACT	1643	387	367	473	1105
Cbx1	MGLibB_08239	AGCCAATGTCAAGTGCCCAC	2564	352	668	319	319
Cbx1	MGLibB_08240	TGGTGGAAAAAGTTCTTGAT	1428	764	1061	472	565
Cbx2	KY013289	CTCCTCTTCCTCGGACGAAG	2798	156	76	241	498
Cbx2	KY013290	GATGGGTTTCACGGCCCCGG	2485	1103	843	1003	1274
Cbx2	MGLibA_08241	GCGGTTCATGTAGTGTACGA	2539	780	718	950	1375
Cbx2	MGLibA_08242	TTTAACGGTGTCCCGCTTGA	2586	552	523	391	455
Cbx2	MGLibA_08243	ACCAGCCGCGCCACTTGACC	4981	407	350	395	422
Cbx2	MGLibB_08241	TCACCTTGAGCTTGGAGCGC	5287	352	277	342	661
Cbx2	MGLibB_08242	GAGTTCTCACTTCTTCTGGA	1618	648	703	575	1231
Cbx2	MGLibB_08243	GCAGGGCAAGCTGGAGTACC	3168	591	423	508	595
Cbx3	MGLibA_08244	AACACAGTGCTGATAATACT	1210	615	483	619	876
Cbx3	MGLibA_08245	GTATACAGGCTGACAAACCA	1441	13	19	11	0
Cbx3	MGLibA_08246	CAACAGGAAGGACTCGGACG	1827	188	126	203	344
Cbx3	MGLibB_08244	TAACTCTCCGCTGCTGTCTG	9593	385	772	301	359
Cbx3	MGLibB_08245	CTGTGAACCCCTTCCACTTC	4029	2362	3381	2116	5478
Cbx3	MGLibB_08246	AAAATGGGAAAGAAACAAAA	97	343	489	514	800
Cbx4	KY013293	CTTGGCACGGTTGTCAGCGG	2120	319	228	315	326
Cbx4	KY013294	TTGGAGCGTCGGGCAAAGGT	1169	730	834	614	1030
Cbx4	KY013295	CTCGGGGCCGTGAAGCCCTT	3037	438	361	359	507
Cbx4	KY013296	CGCTGACAACCGTGCCAAGC	3165	777	781	558	496
Cbx4	MGLibA_08247	CGACGCTCCAATGTTCTGAC	3707	364	655	236	1136
Cbx4	MGLibA_08248	CACGGCCCCGAGGTAGCCTT	2500	206	288	181	320
Cbx4	MGLibA_08249	AGGGCCCAAGCCCAAACCGC	1540	963	1064	590	890
Cbx4	MGLibB_08247	CACTTGCAAGATATAACACG	1824	353	438	336	342
Cbx4	MGLibB_08248	TGCTGATCGCCTTCCAGAAC	3025	406	120	351	305
Cbx4	MGLibB_08249	ACAGGGCAGAGTGGAGTATC	1845	435	423	709	799
Cbx5	KY013297	CAAAGCAATGATATCGCTCG	1626	243	399	221	392
Cbx5	KY013300	TTCCCAAGTATTGTGCTCCC	6201	392	423	243	573
Cbx5	MGLibA_08250	TAAGAACATTAAGTCACCGC	2293	448	455	380	655
Cbx5	MGLibA_08251	GTTGGACAGGCGCATGGTTA	2562	465	388	356	254
Cbx5	MGLibA_08252	TTTAATATCATCAGCGCTGT	3233	163	102	112	323
Cbx5	MGLibB_08250	AGCAAAGCAATGATATCGCT	1159	1099	1324	821	1251
Cbx5	MGLibB_08251	AGGGTGAAAACAATAAGCCC	610	507	400	570	739
Cbx5	MGLibB_08252	AGCCGACAGCTCTTCTTCAG	2382	630	1075	408	617
Cbx6	KY013301	CCCAATGACCCGGTTCCGCG	4126	1437	1348	1330	1805
Cbx6	KY013302	CAATGACCCGGTTCCGCGAG	2491	803	950	714	995
Cbx6	KY013303	CCGCGAGGGGACTTTCGGGC	6494	598	442	427	380
Cbx6	KY013304	GAAAGTCCCCTCGCGGAACC	2160	706	731	891	1178
Cbx6	MGLibA_08253	CGTGCGCATCATCAACCGTA	3809	997	1239	1081	1189
Cbx6	MGLibA_08254	CCCGCCCGAAAGTCCCCTCG	4684	1128	1322	949	1577
Cbx6	MGLibA_08255	TCAGGGACGCATCGAGTACC	6240	757	464	607	775
Cbx6	MGLibB_08253	TCCAACTCACTTCTGCTCGA	4197	839	1027	659	817
Cbx6	MGLibB_08254	GACTCGGCAGGTACAGCACT	4398	546	474	516	369
Cbx6	MGLibB_08255	GAAAGGGAACGTGAGCTGTA	2716	1039	953	1024	1224
Cbx7	KY013307	GAGACCGAGCCTCGGGGTAT	1686	1140	1564	888	1686
Cbx7	KY013308	GAGGAGAGAGACCGAGCCTC	1092	373	381	449	427
Cbx7	KY013310	CGTAGGCCATGACAAGGCGA	2315	1231	1473	1125	1723
Cbx7	MGLibA_08256	ACCTCTCTTCCTATACCCCG	5978	166	151	190	238
Cbx7	MGLibA_08257	GCCTATGGAGCAAGCCCCCG	3251	122	77	188	153
Cbx7	MGLibA_08258	CTTGGACCCTCGCCTTGTCA	6786	689	1664	1071	7647
Cbx7	MGLibB_08256	GGGTCCTTACTTCTCCTCGT	2930	687	803	718	1135
Cbx7	MGLibB_08257	GGAAGAGAGGTCCGAAACCC	1023	1106	1090	791	1374
Cbx7	MGLibB_08258	CCAGACGTTGTGCAGACCCC	4707	248	152	305	470
Cbx8	KY013311	GGGTTTCGGTCCTCGTTTCT	1559	195	147	148	234
Cbx8	KY013312	CTCGGTCCCGGTCCCGAGGT	2985	173	296	106	113
Cbx8	KY013313	GGATTTGGCGTCTACTTCCA	2425	274	280	318	249
Cbx8	KY013314	GCTTGGGTCCTCGCTTTTTG	7351	947	1150	819	1920
Cbx8	MGLibA_08259	GCGCCCCCATGTCCCGATAC	5410	1430	2976	1241	1744
Cbx8	MGLibA_08260	CTCTATGGCCCCAAAAAGCG	1024	241	202	219	297
Cbx8	MGLibA_08261	GCCTGAACTATGTCGAACCC	3895	214	360	188	135
Cbx8	MGLibB_08259	GCATGGAATATCTCGTGAAA	1302	537	332	472	589
Cbx8	MGLibB_08260	TTTCCTTTAGGTACAGCACG	3443	850	706	742	1765
Cbx8	MGLibB_08261	TTTCTTTAGGGAACGGGAGA	733	754	1136	614	592
Ccdc79	KY013883	TTCATTCTTAAACTCAGTTA	2218	470	400	383	440
Ccdc79	KY013884	CTTTGTCTCTTCGGGTGGAC	4900	373	498	419	428
Ccdc79	KY013885	AATTATTTCAAGATTTAACC	663	953	1072	856	1228
Ccdc79	KY013886	ATTTATTTCCGGGAAATTGG	906	556	593	538	662
Ccdc79	KY013887	GGTATTTATTTCCGGGAAAT	597	305	243	237	397
Ccdc79	MGLibA_08649	ATCATCATTAGTTAAGAGCC	1479	323	498	140	106
Ccdc79	MGLibA_08650	GAAGCAGCCTTATACACATT	1650	233	300	217	134
Ccdc79	MGLibA_08651	GGGCAACCCTTTGTCACAAA	994	275	246	72	61
Ccdc79	MGLibB_08649	ACATCAAACCACCAATTTCC	2890	89	47	98	159
Ccdc79	MGLibB_08650	GACATTCCAACAGTAACTTC	2275	87	44	100	181
Ccdc79	MGLibB_08651	AAGTTCTGTCACAGATGTTC	1718	407	445	304	531
Ccl12	KY014039	TCACAGCTTCCCGGGGACAC	4194	1096	1233	1013	1443
Ccl12	MGLibA_08745	TTAAGCAGAAGATTCACGTC	2414	483	378	432	568
Ccl12	MGLibA_08746	TTTGAGACGTCTTATCCAAG	2793	738	1200	494	462
Ccl12	MGLibA_08747	ACAGATCTCCTTATCCAGTA	1956	500	395	438	619
Ccl12	MGLibB_08745	ACATTATAACAGCACGTGAC	2678	1082	924	947	1841
Ccl12	MGLibB_08746	CCTGGTCCAGCCAATACCTG	4181	709	514	483	561
Ccl12	MGLibB_08747	TGATGGTGGTAGCTATGAGC	3384	842	989	749	644
Ccl17	KY014040	TCAAAGGGGCCATTCCTATC	3773	1296	938	1079	1423
Ccl17	KY014041	CCTACATTGGTGGCTCGAGC	3221	1145	1112	1093	1528
Ccl17	KY014042	GCAGCACTCTCGGCCTACAT	4283	1032	1006	957	1226
Ccl17	MGLibA_08748	GCACTCTCGGCCTACATTGG	5371	1728	1633	1431	1521
Ccl17	MGLibA_08749	TGGCCCCTTTGAAGTAATCC	4699	327	397	160	160
Ccl17	MGLibA_08750	GTCACTTCAGATGCTGCTCC	4492	1027	926	992	1859
Ccl17	MGLibB_08748	TCAGATTGGTGAAAAACCCA	1077	731	711	643	929
Ccl17	MGLibB_08749	CAGCGGGAAGGTCATGGCCT	3300	990	916	918	1206
Ccl17	MGLibB_08750	TTTCTGCAGCATGCCAGAGC	4126	1267	1326	1216	1739
Ccl2	KY014044	GATGATCCCAATGAGTAGGC	1643	1023	1056	990	1323
Ccl2	KY014045	AGCTCTCCAGCCTACTCATT	3811	217	850	184	157
Ccl2	KY014046	TCTGGACCCATTCCTTCTTG	7628	717	748	557	479
Ccl2	KY014047	GTCTGGACCCATTCCTTCTT	5715	1276	1892	1026	1208
Ccl2	MGLibA_08787	ATCTCATTTGGTTCCGATCC	4946	294	230	341	284
Ccl2	MGLibA_08788	TGCTGTTCACAGTTGCCGGC	3677	642	1438	442	424
Ccl2	MGLibA_08789	AGCCGGCAACTGTGAACAGC	2118	314	202	222	226
Ccl2	MGLibB_08787	GCTGGTGAATGAGTAGCAGC	1835	1593	1568	1378	1845
Ccl2	MGLibB_08788	GTGCTGACCCCAAGAAGGAA	771	962	924	806	935
Ccl2	MGLibB_08789	GCAAGATGATCCCAATGAGT	2348	2259	2219	2030	2167
Ccl5	KY014076	GTAGAAATACTCCTTGACGT	2165	811	1195	604	1328
Ccl5	KY014077	CACGAGGCAGCGCGAGGGAG	2124	416	298	501	808
Ccl5	KY014078	GCTGCCTCGTGCCCACGTCA	6782	1214	956	1378	1304
Ccl5	MGLibA_08796	GACTCACACGACTGCAAGAT	2222	758	605	739	997
Ccl5	MGLibA_08797	TGTAGAAATACTCCTTGACG	2429	516	808	500	554
Ccl5	MGLibA_08798	CCTGCAGGTTTGTCACTCGA	4934	582	516	565	729
Ccl5	MGLibB_08796	CTCGACTTACATGGTGAGGC	2725	307	273	299	285
Ccl5	MGLibB_08797	TCAAGAATACATCAACTATT	1518	972	1076	1040	1736
Ccl5	MGLibB_08798	TGCAGAGGGCGGCTGCAGTG	3304	2321	2832	1713	2341
Ccnt1	KY014215	CTTCGAGTTTAAACGGAGGT	871	152	76	132	149
Ccnt1	KY014216	TTCGAGTTTAAACGGAGGTT	1638	185	109	149	115
Ccnt1	KY014217	ATCGAGCAGTCTAACTAGTG	2529	383	259	284	440
Ccnt1	KY014218	TGCTTCGTCCTAGGCGTACC	3437	1780	1166	2108	2319
Ccnt1	KY014219	GGCTGAAACGTATTCGGAAT	1091	531	473	300	230
Ccnt1	MGLibA_08889	AAGTGCACCCAGCTTGTTCG	2300	480	536	460	646
Ccnt1	MGLibA_08890	GTTACTTACCTCGAACAAGC	1350	250	173	302	499
Ccnt1	MGLibA_08891	CCAGATCTTGAACTTGTTGT	2435	255	157	323	366
Ccnt1	MGLibB_08889	ACTTCCTGACACGAGGAGTG	1967	202	93	173	261
Ccnt1	MGLibB_08890	CTCACCTCACTCCTCGTGTC	9818	432	204	306	291
Ccnt1	MGLibB_08891	CCTACAACAAGTTCAAGATC	1039	237	463	98	154
Ccnt2	KY014220	GCAGCTCTAGGGTAACCGTG	1538	103	36	82	34
Ccnt2	KY014221	TAGCAGCTCTAGGGTAACCG	1501	271	224	143	113
Ccnt2	KY014222	GGTTGAAGAGGATTCGAAAC	866	331	249	191	177
Ccnt2	KY014223	TGAAGAGGATTCGAAACTGG	1326	118	336	127	118
Ccnt2	KY014224	GCAGGGAACGTTGATGTTGA	1922	928	851	701	674
Ccnt2	MGLibA_08892	ACCACTCACCTCTTACTAAC	3722	185	87	269	199
Ccnt2	MGLibA_08893	CTGCGATTGTTTATATGCAC	3317	447	526	367	368
Ccnt2	MGLibA_08894	AAATGCACCCAGTTAGTAAG	1491	309	328	281	684
Ccnt2	MGLibB_08892	ACCCAGTGTTTGTAGCATTA	2216	293	222	262	487
Ccnt2	MGLibB_08893	GCAGCCAAAAACAATGCAGT	647	498	676	388	1201
Ccnt2	MGLibB_08894	TCTTCAGCAGACTCAAGAAC	1592	443	426	369	598
Ccr4	KY014264	TCCAAAAACCCACTGGTCGG	1299	1459	2065	1310	1397
Ccr4	KY014265	CAGCAGGTACACGTCCGTCA	3414	313	281	260	282
Ccr4	KY014266	ATACCTGGCCATCGTGCACG	4859	861	768	964	2556
Ccr4	KY014267	CTACTACGCCGCCGACCAGT	4565	1135	1139	946	1070
Ccr4	MGLibA_08925	TGTACGGCGTCCAGAAGCCG	3868	1166	1251	1345	1471
Ccr4	MGLibA_08926	TCGTCGAGTTGACCGAGTAC	5606	1041	966	807	899
Ccr4	MGLibA_08927	AGTGCGCATGATCTTCGCCG	5506	851	937	693	788
Ccr4	MGLibB_08925	GTACCTAGACTACGCCATCC	4073	616	553	480	683
Ccr4	MGLibB_08926	GCACGCGGTATTCTCCTTGA	3640	1283	1481	1176	1616
Ccr4	MGLibB_08927	GCTACTACGCCGCCGACCAG	2688	1248	985	1431	1667
Cd27	KY014503	TCTTACCTGGCTCACACATC	5037	1318	1239	1181	2600
Cd27	KY014504	GACAAACACTACTGGACTGG	4508	1328	1571	1235	1659
Cd27	MGLibA_09096	CTGGCTATAGACAGTCGAGT	3277	536	587	446	572
Cd27	MGLibA_09097	CGGGTTTCCGGTAGTCCTCC	5509	1710	1594	1343	1984
Cd27	MGLibB_09097	GCTGTCCAGACAAACACTAC	2053	695	727	748	1171
Cd27	MGLibB_09098	TTGCACAGATGAAGACCGGC	2045	705	597	566	669
Cd274	KY014505	GGTCCAGCTCCCGTTCTACA	3583	626	1288	453	353
Cd274	KY014506	AGTACACCACTAACGCAAGC	1476	1015	1097	772	686
Cd274	KY014507	CTGGTTGATTTTGCGGTATG	3950	638	587	495	682
Cd274	KY014508	TCTGGTTGATTTTGCGGTAT	5170	261	215	265	562
Cd274	KY014509	CTCTGGTTGATTTTGCGGTA	2354	941	771	685	944
Cd274	MGLibA_09090	GTATGGCAGCAACGTCACGA	3037	1897	2215	1187	1234
Cd274	MGLibA_09091	CTGGATCCACGGAAATTCTC	2428	894	904	581	538
Cd274	MGLibA_09092	TCCAAAGGACTTGTACGTGG	2687	631	849	624	956
Cd274	MGLibB_09090	GGACCGTGGACACTACAATG	2351	917	926	552	459
Cd274	MGLibB_09091	GGATGATCAGCTCCGCTGTG	3326	900	1139	819	1258
Cd274	MGLibB_09092	TTTAGTGAGAATGCTAGATG	1970	580	601	574	1639
Cd276	KY014510	CCAACAAGGACCTACGTCCA	3887	1023	1302	1060	1238
Cd276	KY014512	AGCTGCCCTCGTCGGTTACT	4948	903	820	734	1493
Cd276	KY014513	TGGGGAAAAGGAGCAGCGTA	1069	534	489	655	838
Cd276	MGLibA_09093	GCGCGTCCGAGTAACCGACG	2211	1278	1320	1038	1384
Cd276	MGLibA_09094	ATCGAACAAGCCCCGCTCGT	3164	1355	1689	1186	1686
Cd276	MGLibA_09095	CCCAACAAGGACCTACGTCC	3891	1378	1760	1186	1658
Cd276	MGLibB_09093	TCGGACGCGCTGCAGCCTCA	6775	245	218	228	201
Cd276	MGLibB_09094	CCTTGTAGGTGCCGAGGACC	3914	2252	2149	2175	2939
Cd276	MGLibB_09095	TTCTCCAGCACACGAAAGCC	3438	471	599	470	973
Cd28	KY014515	ATGCCGAGTTCAACTGCGAC	2804	751	764	833	931
Cd28	KY014516	AAACAGTGACGTTCCGTCTC	2705	491	602	513	698
Cd28	KY014517	GCTGTTCACGCCCTTGTACA	3594	248	271	172	119
Cd28	KY014518	CTCGGCATTCGAGCGAAACT	1652	1373	1273	1148	1642
Cd28	KY014519	ATCCCCGTCGCAGTTGAACT	4398	308	264	340	430
Cd28	MGLibA_09099	CGCCTTACCTAGACAACGAG	2358	914	857	937	1419
Cd28	MGLibA_09100	CCCGGAATTCCTTTGCGAGA	2001	514	318	475	446
Cd28	MGLibA_09101	GCGGTACGCTGCAAAGTCTC	2326	742	606	567	889
Cd28	MGLibB_09099	CTAGCAAGCCATAACAAAAC	870	407	590	361	354
Cd28	MGLibB_09100	CCCCCTAGACAAATAGTAGA	1110	674	838	587	1430
Cd28	MGLibB_09101	CAGTGGCTCTTTGTGTTATC	3262	534	689	462	539
Cd4	KY014612	TATCACGGCCTATAAGAGTG	3013	312	224	257	286
Cd4	KY014613	CTGAACCCTTAGGTTGGACA	2262	882	634	571	863
Cd4	KY014614	CAGGCTGGTACCCGGACTGA	3363	658	718	715	1349
Cd4	KY014615	GACCTTGGATAGCAACTCTA	1316	842	893	504	870
Cd4	MGLibA_09186	CAGCAAACTGAAGCGAGACC	2218	507	556	479	508
Cd4	MGLibA_09187	CTGGAACTGCACCGTGACCC	4666	452	352	426	606
Cd4	MGLibA_09188	GACCTTAGAGTTGCTATCCA	2442	338	266	343	239
Cd4	MGLibB_09186	TCGCTTCAGTTTGCTGGTTC	4760	1315	1005	903	1284
Cd4	MGLibB_09187	TCAAAACGATCAAACTGCGA	1504	768	1230	812	5886
Cd4	MGLibB_09188	TCAGACTTATATCTGTGAGC	2454	443	397	549	904
Cd40	KY014616	TCCGCTCAGATCAAGGGCTT	3490	1206	1295	1070	1746
Cd40	KY014617	TCAAGGGCTTCGGGTTAAGA	2097	603	395	659	1047
Cd40	KY014618	CTGCACCAGCAAGGATTGCG	2225	896	1094	684	804
Cd40	MGLibA_09171	ACATGCCTCGCAATCCTTGC	6026	671	725	660	1087
Cd40	MGLibA_09172	CCCCATAGCGCGCACAGCCG	3746	1172	1220	1103	1754
Cd40	MGLibA_09173	ACGTAACACACTGCCCTAGA	3507	1794	2073	1662	2551
Cd40	MGLibB_09171	GACAAACAGTACCTCCACGA	1707	502	377	346	946
Cd40	MGLibB_09172	AGCGAATCTCCCTGTTCCAC	3615	780	548	912	1560
Cd40	MGLibB_09173	GCAGTGTTGTCCTTCCTTAC	3428	807	760	944	910
Cd40lg	KY014620	TTCCTTATCACCCAAATGAT	3110	1148	1406	984	2084
Cd40lg	KY014621	AAAGCACAGATCCAATCATT	1847	991	740	1034	1249
Cd40lg	KY014622	TATTTCAAAACAGGTCGAAG	1115	1777	2247	1289	2196
Cd40lg	MGLibA_09168	AGTCAACGCCCATTCATCGT	3980	510	363	346	381
Cd40lg	MGLibA_09169	AGCCAGAGGCCGACGATGAA	1175	1526	2238	979	1672
Cd40lg	MGLibA_09170	GCCAACAGTAATGCAGCATC	3182	2082	2549	1594	1959
Cd40lg	MGLibB_09168	ACCGGATGCTGCATTACTGT	5171	203	132	307	387
Cd40lg	MGLibB_09169	GCAATTTGAAGACCTTGTCA	2803	690	606	629	1237
Cd40lg	MGLibB_09170	CATCTCCTCACAGTTCAGCA	4983	468	457	259	408
Cd70	KY014688	CCTGCTCCCCAGCGCAGTGT	4789	669	484	553	976
Cd70	KY014689	GTGGGGTCCTTCCGAGGAAC	1330	591	516	455	1300
Cd70	KY014690	CTTCACACACGGACCAGAGC	2478	1577	1497	1268	1804
Cd70	KY014691	GAAGGACCCCACACTGCGCT	2335	325	299	265	362
Cd70	KY014692	TCTGTCCCCAGTTCCTCGGA	6238	1851	1481	1669	1635
Cd70	MGLibA_09222	GGACCGCGTTCCAGCGCCAA	2390	746	570	654	1758
Cd70	MGLibA_09223	GCGTTGCGGGACGGCAGCAG	2724	632	691	564	727
Cd70	MGLibA_09224	CAAGCTGATGCCGTGCGCAG	3469	2090	1918	1795	4424
Cd70	MGLibB_09222	GCCCTTGCCCCTGGGTTCGC	7203	936	1057	834	818
Cd70	MGLibB_09223	AGCTGTAACTCAGCTGTGTG	2216	331	341	408	801
Cd70	MGLibB_09224	GAGTTACAGCTGAATCTCAC	2009	1104	1026	1022	1626
Cd74	KY014698	TGTCTAGGCGGCCCTGTTGC	10405	1634	2044	1394	2165
Cd74	KY014700	ACCTGTGAGCCAGATGCGGA	1607	832	767	610	850
Cd74	KY014702	GACATTGGACGCATCAGCAA	2428	694	1040	403	778
Cd74	MGLibA_09228	GCTGATGCGTCCAATGTCCA	4107	465	638	305	340
Cd74	MGLibA_09229	ATTTCGGAAGCTTCATGCGA	2152	811	747	834	955
Cd74	MGLibA_09230	GAGGTCGCGTTGGTCATCCA	4183	395	386	398	720
Cd74	MGLibB_09228	AGGGAGTAGCCATCCGCATC	2605	550	539	427	519
Cd74	MGLibB_09229	CTGGGTCATGTTGCCGTACT	6750	360	701	228	261
Cd74	MGLibB_09230	ACCGCCCTAGAGAGCCAGAA	1943	2018	1950	1813	2499
Cd80	KY014713	GGCCTGGTCCTTTCAGACCG	2605	575	434	566	1511
Cd80	KY014714	CTTCATGAGGAGAGTTGTAA	1298	1220	1052	788	1112
Cd80	KY014715	TCCCAAAGCCTCGCTTCTCT	8876	2982	3021	2598	3698
Cd80	KY014716	TTTCCAGACTCAGTTATGTT	4536	439	380	446	381
Cd80	KY014717	AACCAAGAGAAGCGAGGCTT	1051	1395	1280	1375	2581
Cd80	MGLibA_09240	GAGTCGTATTGAAATCTAGT	975	136	154	221	222
Cd80	MGLibA_09241	AGTCTGAAGACCGAATCTAC	2037	1024	1083	897	1097
Cd80	MGLibA_09242	CATCAATACGACAATTTCCC	3440	324	235	273	341
Cd80	MGLibB_09240	TGTGGCCCGAGTATAAGAAC	1557	1975	2686	1822	2877
Cd80	MGLibB_09241	TGTTCAGCTAATGCTTCTTC	7644	275	499	221	271
Cd80	MGLibB_09242	ACAAGTGTGTTCTTGCTATC	4039	351	250	312	335
Cd86	KY014734	ACTAATTCAACTAATGAGTA	1382	1322	1405	1080	1007
Cd86	KY014736	TGGAGGATAATTGATCCTGT	3302	1709	2481	1257	1477
Cd86	KY014737	CGTACAGAACCAACTTTTGC	2352	527	483	446	533
Cd86	KY014738	TCTGCCGTGCCCATTTACAA	4877	281	229	241	272
Cd86	MGLibA_09255	GTGACCTTGCTTAGACGTGC	3629	1184	1181	1055	1290
Cd86	MGLibA_09256	TTGACCTGCACGTCTAAGCA	4179	605	784	649	944
Cd86	MGLibA_09257	TTCCATCTCCTCAAACGTAT	2544	864	897	622	913
Cd86	MGLibB_09255	CGAGCTTTGACAGGAACAAC	2039	824	647	700	1121
Cd86	MGLibB_09256	GAAATAAGCTTGCGTCTCCA	1981	455	305	466	474
Cd86	MGLibB_09257	ATCTCCTTCCAATACGTTTG	4397	601	795	455	663
Cd8a	KY014739	GTGTTGGGGTCCGTTTCGCA	3228	743	555	566	690
Cd8a	KY014741	ATCCCACAACAAGATAACGT	1352	947	995	669	636
Cd8a	KY014742	CCAAGAGCATCCTTGCGAAA	1743	660	733	487	759
Cd8a	KY014743	TGAAGCCATATAGACAACGA	1950	308	227	332	377
Cd8a	MGLibA_09258	CGTCCCACGTTATCTTGTTG	8354	2996	4225	2892	4426
Cd8a	MGLibA_09259	GCCCACCTTCGTTGTCTATA	4829	718	700	711	1331
Cd8a	MGLibA_09260	ACCCTTGGCCGGAATCTGCG	3392	588	747	358	475
Cd8a	MGLibB_09258	CAGAAGGGCCACGCAGATTC	2336	276	217	355	583
Cd8a	MGLibB_09259	GGGAGTTCGCAGCACTGGCT	1651	1437	1280	1351	2313
Cd8a	MGLibB_09260	GAGCACCTAACCTGAGCCAC	2432	584	526	417	911
Cdc5l	KY014917	GCTCCGAGTACCTGAGGCGC	2150	179	88	224	160
Cdc5l	KY014918	CCGGCCTGACCCGATAGACA	2998	159	44	237	105
Cdc5l	KY014919	TCTTCCTATGATCGGAGCAA	2810	98	61	128	54
Cdc5l	KY014920	AGGACCATTGCTCCGATCAT	2697	86	20	224	71
Cdc5l	KY014921	TTGCCTTTAATAGGTACGAA	1188	320	200	278	132
Cdc5l	MGLibA_09372	CTTTAATAGGTACGAATGGC	1694	342	128	380	186
Cdc5l	MGLibA_09373	CAAGGGACAAAACTGCCCAA	865	92	40	146	76
Cdc5l	MGLibA_09374	ACTCATAGTGTTCCAAGCAC	2342	249	47	178	75
Cdc5l	MGLibB_09372	TCACCCTCATCCATGTCTAT	5872	28	6	19	2
Cdc5l	MGLibB_09373	TGAACTTGAGATGCTCTCCG	3524	1460	1252	1744	2063
Cdc5l	MGLibB_09374	GGATGAAATTCTGAAAGCAG	757	222	154	287	91
Cdc73	KY014933	TCCAAGTAGATCTTTTCGGT	2170	174	129	182	199
Cdc73	KY014934	CCAAGTAGATCTTTTCGGTC	2054	412	242	269	262
Cdc73	KY014935	GCTGCACGCCGGACATAAAC	373	163	96	112	78
Cdc73	MGLibA_09378	CCCGACCGAAAAGATCTACT	1565	401	58	629	370
Cdc73	MGLibA_09379	AGTTCTATTACCTCAATCCG	2422	21	5	26	33
Cdc73	MGLibA_09380	TTCTACTTACAGCTGCACGC	6829	353	249	303	141
Cdc73	MGLibB_09378	GCGAAAGGTGCACATTATTA	1970	500	644	343	370
Cdc73	MGLibB_09379	CCGCTGAAGACCTATTTCCA	2011	242	100	274	440
Cdc73	MGLibB_09380	CAACATCAGCAAGCATAGAC	1476	290	84	290	1042
Cdk9	KY015234	GGTTGGTGTATCGGTTGGGC	2770	724	775	567	692
Cdk9	KY015235	CTGCCCTTGCAGCGGTTATA	36	208	157	179	61
Cdk9	KY015236	CTTGCAGCGGTTATACGGTG	684	314	114	320	217
Cdk9	KY015238	ATTGAGATTTGTCGGACCAA	1478	268	119	123	61
Cdk9	MGLibA_09573	GACATTGTGGTACCGGCCTC	3411	28	6	24	12
Cdk9	MGLibA_09574	CTCACCGTATAACCGCTGCA	4675	0	1	1	4
Cdk9	MGLibA_09575	TGGGCTGGCTATTCTTAGCT	1293	58	15	54	27
Cdk9	MGLibB_09573	CTTTCTTCAGAGCCACCTTC	5039	426	240	447	475
Cdk9	MGLibB_09574	TGGTCCGACAAATCTCAATT	2828	813	414	718	409
Cdk9	MGLibB_09575	AGTTCCCCATCACAGCCTTG	2825	592	298	707	730
Cdyl	KY015382	GGTGCGGAGCGAGCCAGGAT	998	335	718	176	1490
Cdyl	KY015383	TTTGCCTCTCGTTGTGGCGC	8979	596	639	486	514
Cdyl	KY015384	AATCTGCTTCCGGGCGTTGC	3083	1302	1461	1202	1985
Cdyl	KY015385	CCGAGGTCCTGCCCTTAACG	5759	372	385	441	510
Cdyl	KY015386	TCCTGGCTCGCTCCGCACCA	8243	2199	2420	1688	2085
Cdyl	MGLibA_09675	CGTGCCTAAGAGCCCCGTTA	3338	776	838	603	1072
Cdyl	MGLibA_09676	AAACGCAACCGCTTGTCAAA	1451	640	518	519	472
Cdyl	MGLibA_09677	CAGAACCAGCTTGCTGTCGT	2976	270	193	270	1407
Cdyl	MGLibB_09675	TCCTCGGCACCCTGATCCAC	6265	2160	3031	1831	2397
Cdyl	MGLibB_09676	TGCAGCCGACGACAGCAAGC	2382	1853	2467	1234	1976
Cdyl	MGLibB_09677	AGATGCTCCTCCCATAATCT	2808	605	718	586	678
Cdyl2	KY015387	GTGGGTCCCGTCGCAGTCAC	3531	744	752	587	750
Cdyl2	KY015388	GTTGACGCGCTTCCGCTTGT	6066	811	937	661	1432
Cdyl2	KY015389	CGGGACCCACTCCGCGCTGG	2821	757	823	698	872
Cdyl2	MGLibA_09672	AGTTTATCGACGAGTTCAAC	1728	407	366	371	362
Cdyl2	MGLibA_09673	CGGGTCCCATCAGCCGGATC	3512	1141	929	990	1325
Cdyl2	MGLibA_09674	CGCTGGACAGCCGGCCGATC	3536	802	707	716	1201
Cdyl2	MGLibB_09672	ACCATCCGACTCACGCCTGC	5016	217	143	166	233
Cdyl2	MGLibB_09673	CTCGAATCGCAGAAGCTATC	2298	1010	1179	801	1001
Cdyl2	MGLibB_09674	CCCATTAATGGCTACCACGA	3444	546	410	422	520
Cecr2	KY015487	AGATATCATTAACTACCGTT	1911	402	370	398	380
Cecr2	KY015488	CATTTTCTGTAGGATCCCGA	3187	124	79	121	84
Cecr2	KY015489	TCATTATAGATCGAGCTAAG	1941	65	29	60	56
Cecr2	KY015490	CCTCAGGGGACGATCAGAGT	2291	642	498	601	914
Cecr2	KY015491	GAGGCAGCTCGGCGTGCCGG	2891	393	385	434	504
Cecr2	MGLibA_09741	ATCTCTACTCGAGTACGCAG	2461	526	463	440	583
Cecr2	MGLibA_09742	AAGATATCATTAACTACCGT	1261	145	103	127	141
Cecr2	MGLibA_09743	TCCAAAGCGAAAAAAGCTAC	427	240	244	256	182
Cecr2	MGLibB_09741	ACAATTCAGGTGCACTCTAC	2906	568	356	558	534
Cecr2	MGLibB_09742	GCACAAGGAGAGTTCTCCAT	2714	452	574	466	834
Cecr2	MGLibB_09743	AGCTCTTCACAGAGATGACG	847	624	851	497	579
Chaf1a	KY015956	TGTGGTCATTATCGACCTGA	4068	382	386	412	504
Chaf1a	KY015958	TTGGGAGCCTGCGGAGTCTT	2904	769	613	846	1233
Chaf1a	MGLibA_10113	GGAAGAGATACGACGAGCCA	608	384	270	464	488
Chaf1a	MGLibA_10114	GGAAAAACGCAAGGAGCGGC	594	312	365	399	390
Chaf1a	MGLibA_10115	ATAATGACCACACTCGGTAC	2072	86	11	75	72
Chaf1a	MGLibB_10112	TGCCCTCAAGAAGCTATCAA	1760	57	45	96	62
Chaf1a	MGLibB_10113	GTGGATTGCAAAGACAGACC	1019	404	315	496	723
Chaf1a	MGLibB_10114	CCAGTGAAGAGGTTAATACA	1666	233	256	152	349
Chaf1b	KY015959	CGGGGGTGGACACCGCCGTC	1678	542	351	928	1778
Chaf1b	KY015960	GGGGGTGGACACCGCCGTCA	4	275	274	232	116
Chaf1b	KY015961	CTGTCCATTTACCCTGACGG	5962	84	29	165	94
Chaf1b	KY015962	TTTGGTGTGTCGAGCAAGAT	2062	56	3	91	112
Chaf1b	KY015963	TGCTGTCGTCGTGAAACATC	3334	427	294	372	379
Chaf1b	MGLibA_10116	ATCATATGGGATGTCAGTAA	1750	73	5	106	102
Chaf1b	MGLibA_10117	GTCGCAATATATTGACCCAA	1252	972	524	805	949
Chaf1b	MGLibA_10118	GCGTACAACATTGACAGCTT	1506		0		1
Chaf1b	MGLibB_10115	GATGCTAAAATCTCCCCAGT	1094	309	126	495	208
Chaf1b	MGLibB_10116	CGCAGCTGAATAAGGAGAAC	1098	213	40	340	647
Chaf1b	MGLibB_10117	CAGATGCCGTCATTCTGTTG	5220	140	21	154	132
Chd1	KY016004	TCGGCTCCGTCGACTTTTGG	4951	196	146	231	146
Chd1	KY016005	TTTGTTTTTCGGCTCGTAGT	3398	481	533	323	231
Chd1	KY016006	TAAATTTTAACCGTTTGGTC	1877	1099	1116	892	1442
Chd1	KY016007	TAGCACTTAATCCGTAGTAG	2092	583	478	599	725
Chd1	MGLibA_10152	GACTCCGACGACTCGTCCAG	2759	620	788	605	938
Chd1	MGLibA_10153	ACCTCGGCTCCGTCGACTTT	5238	210	445	236	210
Chd1	MGLibA_10154	CGCCCAGCTTCATCTAATAG	2670	571	562	563	782
Chd1	MGLibB_10151	GATCCACTATTAGATGAAGC	1145	99	49	112	106
Chd1	MGLibB_10152	GTCGTCGGAGTCTTCACTGC	5009	770	750	759	1109
Chd1	MGLibB_10153	GCAAAACCACCAAAAGTCGA	1152	266	252	178	126
Chd1l	KY016008	AGGCTACAGCTACGAGCGTG	1965	353	675	460	1067
Chd1l	KY016009	CACTCACCATCGAACAGATA	2235	282	426	231	138
Chd1l	KY016010	ACTCACCATCGAACAGATAC	1798	594	561	471	481
Chd1l	KY016011	AGAACATCCTGACGCAGCTT	2140	578	668	590	992
Chd1l	MGLibA_10149	CGTGCTGCTGACGACATACG	4948	1731	1745	2290	29246
Chd1l	MGLibA_10150	GTCTCCCCACCAAGTAAATG	1538	374	403	323	339
Chd1l	MGLibA_10151	TCGTCTACGTTCTTACCAAC	2735	1094	1199	864	1217
Chd1l	MGLibB_10148	TATCGCTCTCCTCATTTACT	6783	340	293	268	193
Chd1l	MGLibB_10149	GTCACCTGTGTATGTCACAC	3827	711	1098	604	725
Chd1l	MGLibB_10150	CAGTGCTTCCATTGCCAGAA	2258	353	373	284	595
Chd2	KY016013	TGGCTTCCTTAATATCGTGA	4993	105	38	137	139
Chd2	KY016014	TTTTTCACTTTAGACCGTGC	4896	584	299	287	505
Chd2	KY016015	CAGGTAGGAGAGAAACGATA	792	223	214	138	166
Chd2	KY016016	GGAAGCTGTCGATACAATTC	1665	661	466	651	859
Chd2	KY016017	AAGCAACCTAAGATTCAGCG	1105	411	531	499	698
Chd2	MGLibA_10155	ACCATCACGATTTAATGTTA	2310	432	419	485	455
Chd2	MGLibA_10156	TCCTTAACATTAAATCGTGA	1879	300	489	366	697
Chd2	MGLibA_10157	CAGCGAGTCCAATAGCAGTT	2336	155	116	151	61
Chd2	MGLibB_10154	CTAGAAGACCGGTCCCTAGA	1682	528	350	695	424
Chd2	MGLibB_10155	AGAAGACTCCGAACTGCTAT	1123	298	271	271	244
Chd2	MGLibB_10156	CCACACTGAAGGCAAGTAGC	2082	526	507	568	649
Chd3	KY016018	GCCAAGCGCCGCCTGATCGA	2852	424	248	421	463
Chd3	KY016019	CTACCGTTTCGGCATCAAGC	2129	910	950	908	969
Chd3	KY016020	TAATGTACCGAAACTATCAA	1456	221	200	236	277
Chd3	KY016021	GCCTTGACCCCGAGCTTGAC	4668	1848	2027	1240	1705
Chd3	KY016022	GCAGCTGCCGACCCTTTGAA	1592	442	450	217	518
Chd3	MGLibA_10158	GGTGTGAAGAAGCGAAAACG	564	382	346	316	322
Chd3	MGLibA_10159	TGTGGAACACGTGTTCTCCG	2424	417	399	491	407
Chd3	MGLibA_10160	CAGCTGCCGACCCTTTGAAG	4030	813	753	722	925
Chd3	MGLibB_10157	GCCACCCCCATAGCACCATC	6125	766	867	824	1007
Chd3	MGLibB_10158	ACGAGCTTCTTCCGTTTCCT	3868	1477	1738	1384	2157
Chd3	MGLibB_10159	TTCCTTCTTCGTTTCCGACC	8771	65	54	58	80
Chd4	KY016023	TTGGTCTTGGCCTTGCGGAT	3902	172	79	207	378
Chd4	KY016024	GGCACACCTCGCAATAGTCC	3929	668	833	505	1076
Chd4	KY016025	GACAGAGCCATTCGCCGTTT	2801	1877	1738	1640	2254
Chd4	KY016026	CCTCCAAGGGCTTGGGCGAC	2366	628	324	434	748
Chd4	KY016027	CAGAGGAGCGCTCACTAAGA	1348	559	502	697	726
Chd4	MGLibA_10161	GCTTCGGATAAATCCTCGTC	3874	363	241	376	505
Chd4	MGLibA_10162	TCGGACCCTCACCAACTACA	3891	537	457	626	577
Chd4	MGLibA_10163	TCCTGACTTACCTAACAAAT	2016	674	564	628	563
Chd4	MGLibB_10160	TTGCGGATCGGCACCTCCAC	7480	62	12	120	537
Chd4	MGLibB_10161	TAAGAGCAAGCGCCAAAAAA	540	523	444	562	835
Chd4	MGLibB_10162	GGCTCTGCGCTCAGACAGTG	3373	443	213	424	486
Chd5	KY016028	AGCGCCAACAACCCGTTTAA	1513	447	322	529	442
Chd5	KY016029	TGAACTTTGCCCTTCAGCGG	2926	563	711	569	504
Chd5	KY016030	TCCACGATGGGCGTATCGGG	2988	261	289	248	440
Chd5	KY016031	TGGTACATCGACGCCACAGG	2184	649	739	696	680
Chd5	KY016032	GAGGACAACGCCATTCGCGG	1845	611	341	422	412
Chd5	MGLibA_10164	ATCTCCTCCGCGAACAGCCG	2971	654	987	709	589
Chd5	MGLibA_10165	CTCCGCCATGAGTTGTCCCG	4316	1002	1101	1078	1249
Chd5	MGLibA_10166	GACAACTCATGGCGGAGTGG	1645	423	665	246	338
Chd5	MGLibB_10163	TGACGAGATGTCAGACAACG	1556	369	193	323	448
Chd5	MGLibB_10164	GCCGGGCATGCGGGGCCCGC	4868	209	189	163	548
Chd5	MGLibB_10165	AAAGAGAGCAAGTCCTCCAA	1045	586	711	412	340
Chd6	KY016033	CTCGGAAGCACTCAGCGCGG	1769	691	662	475	682
Chd6	KY016034	TTATGGGGCTTTAATGGACG	1903	173	146	95	194
Chd6	KY016035	CTCCCCAAGCTCATTGCCGG	4974	1200	1253	1158	1068
Chd6	KY016036	GCCAGTTCATCCCCTCGAGT	4059	52	73	126	78
Chd6	KY016037	TAGAAAAGCTCTAGGTCGAA	411	383	568	325	349
Chd6	MGLibA_10167	GTTCTGCAGAAACGGCGCTC	1474	559	571	523	805
Chd6	MGLibA_10168	CTTATGGGGCAGACAATGAT	1755	297	222	244	170
Chd6	MGLibA_10169	CGGAGGCCTCCCGGTGCTTC	915	444	256	270	348
Chd6	MGLibB_10166	ACCGACCTCCTGGACAGTCT	2927	829	887	1013	1069
Chd6	MGLibB_10167	GGGCTGTACCTCAGCCTGCC	3207	433	317	504	747
Chd6	MGLibB_10168	ATGTCTTGTAGCAGGGAGCA	2116	292	292	272	359
Chd7	KY016038	GAGACGCCAATCCGTTCCCG	2034	524	567	295	328
Chd7	KY016039	GGCATGTGCGACAGGTGGCC	2692	137	258	146	149
Chd7	KY016040	GCTGCTGCTCTATCGACGGC	2351	1132	1575	665	960
Chd7	KY016041	AAGGGAATTCCGAACCTGGA	839	793	890	852	1257
Chd7	KY016042	CGGCCATCAATCCTTTCGTA	4217	511	422	447	618
Chd7	MGLibA_10170	GAGCGTTCTGTGCGCTGACC	4822	76	35	60	107
Chd7	MGLibA_10171	GAAGGTCAAAAAAGATCCGA	522	324	260	278	299
Chd7	MGLibA_10172	ACCGTCCCCCGCTCCTGAAG	4099	355	389	224	452
Chd7	MGLibB_10169	TGTAGAAGAGGCGGTCCAGC	3269	875	723	893	1323
Chd7	MGLibB_10170	CAGCCGCCTAGTGAAAAAGC	1071	238	442	210	354
Chd7	MGLibB_10171	GAAGCGATACACTGAAGATT	1241	754	776	602	611
Chd8	KY016043	CAAGCACGTTGTCATCGAAT	3001	720	379	776	772
Chd8	KY016044	CAGGCTATGGTTCGGTCAGC	2838	1662	1396	1622	1201
Chd8	KY016045	GTGGGCAACGATCTCCCAGC	2066	146	78	150	267
Chd8	KY016046	TATGCCTGCACAATCGCCCC	7605	624	487	422	445
Chd8	KY016047	AGCTGTTTTACTGGTCGGCT	1127	469	313	438	603
Chd8	MGLibA_10173	ATCGTCTGACAACTCTGACG	3481	760	768	617	446
Chd8	MGLibA_10174	TGAATCGAAACGCATCACTT	2552	505	486	613	1068
Chd8	MGLibA_10175	GGACATCGGCATGTTGTGTT	4087	978	597	689	676
Chd8	MGLibB_10172	CATACCTCGAGTCCTGAATG	4192	997	603	968	718
Chd8	MGLibB_10173	TTATGCCTGCACAATCGCCC	5849	265	112	183	91
Chd8	MGLibB_10174	CCAGTCTTCCCTGCAGTATG	7495	706	263	477	324
Chd9	KY016048	TTCCCAGATCCTGTTGACGC	5342	1000	1132	891	1524
Chd9	KY016049	AAATGGTGATTCGTCAAATT	438	112	142	71	238
Chd9	KY016050	CTGGGACCTCTGCTCGGCAT	3517	687	545	608	916
Chd9	KY016051	CTTGGAACCGGTACGCTCCT	3606	974	1163	827	1491
Chd9	KY016052	AAAACGAATCGATCTGAATC	467	40	14	19	12
Chd9	MGLibA_10176	AGCTGTCCGATGCCGAGCAG	3913	768	953	611	1062
Chd9	MGLibA_10177	CTCGGCATCGGACAGCTCAT	2154	118	69	124	138
Chd9	MGLibA_10178	TTCTCAGGGCTCATTACTCG	4568	926	580	863	889
Chd9	MGLibB_10175	CACTAAGCTGCAGAATACCC	2809	719	638	675	687
Chd9	MGLibB_10176	GATCAAATCGACAAATTAAG	840	51	34	62	92
Chd9	MGLibB_10177	TAGACAAAATACTAGCTTGT	870	411	432	369	477
Chmp1b	MGLibA_10242	GCCGTCAGACTTGATCCCGA	3166	897	1211	739	841
Chmp1b	MGLibA_10243	ACATCGTCGTGCGGCTTCGG	3449	412	440	303	366
Chmp1b	MGLibA_10244	GTTCTTTGGCCGCGAATTTC	2199	685	661	659	1081
Chmp1b	MGLibB_10241	CGAACACCAGTTCGAGACTC	1586	626	735	429	542
Chmp1b	MGLibB_10242	ATACACAGTTACGCTAACTC	2431	443	427	254	396
Chmp1b	MGLibB_10243	CCGCACGACGATGTCCAACA	3361	231	174	215	253
Chmp2a	KY016156	AAACTTGCGTACATATCTCC	2596	131	76	210	192
Chmp2a	KY016157	CATATCTCCGGGTACGCACC	5098	245	65	288	170
Chmp2a	KY016158	CAAAAGACCTGGTGCGTACC	2786	321	286	190	143
Chmp2a	MGLibA_10245	CAAACTTGCGTACATATCTC	1261	41	38	32	18
Chmp2a	MGLibA_10246	GCAGGATGCTGTTCGAATCA	2444	945	531	794	394
Chmp2a	MGLibA_10247	TCTGCAGACCTTCCCTCCAC	7081	343	169	173	82
Chmp2a	MGLibB_10244	TAGTGATGCTGTTGTGTCCC	6951	1580	991	898	1173
Chmp2a	MGLibB_10245	CACTTGACAGCTCATCTGTG	4306	179	103	164	179
Chmp2a	MGLibB_10246	GGCTCACTCAGTGTGGCAGC	2703	354	204	273	285
Chmp4b	KY016170	ATTTTTGGTGCCGTGCTTCT	5213	91	55	137	85
Chmp4b	KY016171	CGTCTCACCGCGTTTATTTT	3092	50	15	72	7
Chmp4b	KY016172	TGTCAACCATCGAGTTCCAG	3813	167	70	101	52
Chmp4b	KY016173	GTTGGTGTTGGCGTTCTCTA	2064	191	104	231	219
Chmp4b	KY016174	GTTCTTGAGCACCTCCGTGT	2503	333	234	392	493
Chmp4b	MGLibA_10254	CTTTGGAGAAGAGTTCGACG	2047	608	627	650	1035
Chmp4b	MGLibA_10255	GCATACTCACCGGGTTTGGA	1758	425	198	419	561
Chmp4b	MGLibA_10256	CTTCCCTCTAGCCGCCCTGC	5447	137	100	137	150
Chmp4b	MGLibB_10253	GCAGCACATACATGTTGTCG	1759	908	761	813	802
Chmp4b	MGLibB_10254	GTAGCCCTACCATCCAAACC	2378	198	100	322	211
Chmp4b	MGLibB_10255	CTGGAACAGTTACATGGATC	2168	836	588	866	906
Chmp4c	KY016175	CGAGTTCCAGCGAGAAGCGC	1838	1037	1270	624	829
Chmp4c	KY016176	GGAGAACTCGCACACCAACA	1413	294	145	312	624
Chmp4c	KY016177	ACACCAACACGGAGGTCTTA	1237	474	449	324	525
Chmp4c	KY016178	CACGGAGGTCTTACGGAACA	2358	459	528	434	518
Chmp4c	KY016179	ACGGAGGTCTTACGGAACAT	1887	441	452	488	586
Chmp4c	MGLibA_10257	GTTCCGTAAGACCTCCGTGT	2201	671	714	743	1071
Chmp4c	MGLibA_10258	ACCTACCTCATCGAAGCCAT	3516	370	209	279	258
Chmp4c	MGLibA_10259	AGTTCTCCAGCGCTTCTCGC	3411	2002	1647	1927	2051
Chmp4c	MGLibB_10256	GTTTGCCGATGGCTTCGATG	4645	371	318	290	282
Chmp4c	MGLibB_10257	GGAACAGACCTGCTCGAGAC	1398	146	134	172	195
Chmp4c	MGLibB_10258	GCATGCCCTCCTCCGTGCAC	10112	331	343	262	262
Chmp5	KY016180	TGACAAAAAGATTTCCCGGC	1147	455	162	469	684
Chmp5	KY016182	TGTTAAAGGACTGTTGGGCC	2386	125	11	131	49
Chmp5	KY016183	TATGGGGCATACCGTGGTCT	3940	213	90	250	156
Chmp5	MGLibA_10260	TGAGCAACAGCGAGACAACC	1499	279	47	367	526
Chmp5	MGLibA_10261	TCACTAGTTCAGCATCCAGC	2531	577	385	731	2457
Chmp5	MGLibA_10262	TGCTGAACTAGTGAAATATA	1092	283	67	174	106
Chmp5	MGLibB_10259	TTAGGTTGATGCCATGAAGT	2541	749	870	694	1113
Chmp5	MGLibB_10260	TTACACCATCCAGTCACTAA	2788	362	150	397	365
Chmp5	MGLibB_10261	GGAAATGAAGAAGGCATATA	554	93	48	94	49
Chrac1	KY016221	CGAGGTGTCGAGCATCAACC	3174	398	283	305	941
Chrac1	KY016222	GGTGTCGAGCATCAACCAGG	1087	545	588	349	332
Chrac1	KY016223	TGGTTGATGCTCGACACCTC	3596	172	179	289	374
Chrac1	MGLibA_10299	GGGGCAATGACACGAGCCGC	932	150	114	149	459
Chrac1	MGLibA_10300	GACGCGGAAGATGGCGGACG	716	726	552	697	1051
Chrac1	MGLibA_10301	GAGACACTTCAGTTTCTCGC	2215	816	1329	745	914
Chrac1	MGLibB_10298	TTACTAGCTAAAATCTTCTT	1205	106	139	153	131
Chrac1	MGLibB_10299	AAGCGACCTTGGTGAAGCCC	2335	271	123	213	137
Chrac1	MGLibB_10300	CGACTTAGCCAGCACTGCAG	3138	830	630	788	676
Ciita	KY016487	GCTGAACTGGTCGCAGTTGA	2973	249	249	235	403
Ciita	KY016488	ACGGGAGGTCAGCGCAGGTT	2688	857	717	933	1411
Ciita	KY016489	TCATTGCTTGGATCGTCCCG	9970	495	547	346	417
Ciita	KY016490	TTCCAGCGGAAGCTACTGCG	4027	585	643	518	582
Ciita	KY016491	GACAGAGCAGATCCCGCAGG	1255	840	806	759	738
Ciita	MGLibA_10467	ACTGGATCAGTACGTGTTCC	2135	100	91	113	127
Ciita	MGLibA_10468	GAGGAGATCGAACTCAGCTC	837	653	914	640	791
Ciita	MGLibA_10469	CCTGCAACAGCTTGCTGAAC	2861	608	931	511	477
Ciita	MGLibB_10466	ATAGAGATCCCTGTAGAAGC	1023	504	388	601	1096
Ciita	MGLibB_10467	CCAGTTCAGCAAGCTGTTGC	4441	115	37	109	116
Ciita	MGLibB_10468	TACTGAAGAGGTCCTTGCTC	3550	2099	3005	2045	3686
Clock	KY017035	GCTGAAAGACGGCGAGAACT	1301	310	329	238	292
Clock	KY017036	GAACTATACAACGCACACAT	2298	175	159	111	28
Clock	KY017037	CTAGTGAGATTCGACAGGAC	2188	225	226	200	335
Clock	MGLibA_10854	AGATGCTAGTGAGATTCGAC	1551	172	152	175	111
Clock	MGLibA_10855	TCCTGGTAACGCGAGAAAGA	853	477	573	275	210
Clock	MGLibA_10856	TCCATCTTTCTCGCGTTACC	6935	1408	2519	1004	1436
Clock	MGLibB_10853	ACTAGCATCTGACTGTGCAG	2143	207	171	88	99
Clock	MGLibB_10854	ATTGGTGGAAGAAGATGACA	862	925	932	564	498
Clock	MGLibB_10855	TAGACCCCAGCTCCTTAATG	3774	493	365	210	133
Cml1	KY017181	TGGCAAGGAGCCGCAGAAGT	1286	206	251	288	377
Cml1	KY017183	AGCATGTGCCGAAAGGTAGA	1397	760	732	790	1045
Cml1	KY017184	AGTACATTCCCTCTACCTTT	3549	558	703	587	615
Cml1	MGLibA_10956	CAGCATAAGCATGTGCCGAA	1474	859	895	698	1079
Cml1	MGLibA_10957	AGTACTTCATGAGTATATTC	1661	236	294	253	257
Cml1	MGLibA_10958	AATGTACTCCTCCATGCCCT	4213	238	138	176	274
Cml1	MGLibB_10955	AGAATATACTCATGAAGTAC	1003	565	346	454	972
Cml1	MGLibB_10956	AGCCACCCCTCCTAGGCAGA	2839	256	278	229	130
Cml1	MGLibB_10957	TGGTACTGTCGGATGTGATA	3798	210	189	79	197
Control	mCTRL0001	GCGAGGTATTCGGCTCCGCG	4781	445	564	493	675
Control	mCTRL0002	GCTTTCACGGAGGTTCGACG	2571	306	562	243	987
Control	mCTRL0003	ATGTTGCAGTTCGGCTCGAT	3415	308	393	269	618
Control	mCTRL0004	ACGTGTAAGGCGAACGCCTT	1058	544	548	452	480
Control	mCTRL0005	GACTCCGGGTACTAAATGTC	2068	607	598	547	777
Control	mCTRL0006	CCGCGCCGTTAGGGAACGAG	2643	471	514	332	658
Control	mCTRL0007	ATTGTTCGACCGTCTACGGG	2731	657	981	613	551
Control	mCTRL0008	ACCCATCGGGTGCGATATGG	3172	241	187	296	421
Control	mCTRL0009	CGGGCGTCACCTGCTAGTAA	2724	616	754	304	420
Control	mCTRL0010	GCTTCTACTCGCAACGTATT	2627	1635	1775	1255	1173
Control	mCTRL0011	TACAGTTATACGTCGCGGTG	2606	145	104	173	227
Control	mCTRL0012	AAGCACAAGAACGGTCCGCC	1258	695	612	470	516
Control	mCTRL0013	CAGCCACCGCACCGGCGTAA	2804	782	809	777	1313
Control	mCTRL0014	GTCAAGCCGAACGCTGCCGG	1913	1238	979	1056	1167
Control	mCTRL0015	CCTTAGACCGGGTGTACCTC	3793	296	301	291	339
Control	mCTRL0016	AAGTCTATGCGGGGCTCGTA	1597	995	785	1252	2643
Control	mCTRL0017	TTGTCAACTTCGGCCAACGC	4566	732	802	708	1060
Control	mCTRL0018	ATAGATGTCTACGCGCCGTT	3862	405	406	384	441
Control	mCTRL0019	CTCGGGCTATTCAGCGATAG	1464	620	951	478	1108
Control	mCTRL0020	GCGGTTACCGCGAAAACCAT	1715	484	526	397	713
Control	mCTRL0021	ACCAACGCTACGATCCCGGA	2214	722	674	509	730
Control	mCTRL0022	CCCTATATGCGAGATCCATA	3303	1053	1520	918	1330
Control	mCTRL0023	AGAAAGGCACGTGCGACGTC	2048	612	848	481	346
Control	mCTRL0024	GACCAACCTTACGGTAACTC	2134	1116	2040	869	1385
Control	mCTRL0025	ATTATTCCTCCGGATGACGA	2598	225	271	226	293
Control	mCTRL0026	TCTCAGTTCGTAGCGAACGA	3089	318	358	248	183
Control	mCTRL0027	TCCCGGGAGGTACGGTGTAC	501	307	243	312	359
Control	mCTRL0028	GGGGATGGCCTTACGTCGCG	2808	753	690	578	605
Control	mCTRL0029	GTATCCTCCTTACGGCCCGT	4154	662	655	535	849
Control	mCTRL0030	GCTCGGACCTTTTAGACGTC	3433	299	209	301	405
Control	mCTRL0031	GTGGTTACGTTAACGACTAC	2354	506	538	448	1289
Control	mCTRL0032	TGCAACGATGGTTACGGTAC	3115	882	1278	774	1270
Control	mCTRL0033	AACGGGCGCAATACCCTTTT	3348	116	236	45	44
Control	mCTRL0034	TCGTGTCTAGCTATCGAGTG	2740	565	741	581	901
Control	mCTRL0035	GACGTCTAATTTCTGGCCGT	1389	1815	1753	1452	2068
Control	mCTRL0036	TAGTCCTAGTTAGATTCGCG	3973	258	273	353	241
Control	mCTRL0037	AAGGCCTTAACACGTCGACC	2636	1006	764	927	1060
Control	mCTRL0038	ATTCGTGCATCGCGGGGTTT	4297	470	397	626	853
Control	mCTRL0039	CACCTCGCGTCATATCACTA	4631	1409	1471	1294	1830
Control	mCTRL0040	GACCTCGCAATTGAGCGCTC	2512	792	971	509	643
Control	mCTRL0041	TGTATCCACCGTGACCCGGT	2406	357	611	374	507
Control	mCTRL0042	GATCTTACCACTCGTCGTAG	3589	543	559	544	1144
Control	mCTRL0043	TTCGCCGGCGACGAAGTGCA	3385	650	823	571	638
Control	mCTRL0044	AGCACTAGGATCGCGGCCTT	1867	639	1054	459	1152
Control	mCTRL0045	GCGTATCTACCCTACCGCCG	1383	1115	1045	1107	2320
Control	mCTRL0046	GCGCGAGGGCACCGACAAGT	1424	534	875	357	218
Control	mCTRL0047	CGCGTATATGTCACACGGCA	3316	789	921	749	910
Control	mCTRL0048	TAAAACCGATCACGATACGA	1171	1198	1109	938	1044
Control	mCTRL0049	TCCTGCGCGATGACCGTCGG	6466	479	312	508	610
Control	mCTRL0050	TGGCCCACAAGGTGCGATAT	4495	1471	1504	1228	1934
Control	mCTRL0051	GGGGTAGGCCTAATTACGGA	964	2027	3091	1992	2549
Control	mCTRL0052	CGCTTCGTCTCTCGCAAACA	2987	664	573	643	1539
Control	mCTRL0053	TTATGTGCCTCTCGGCGCAT	6160	689	744	532	825
Control	mCTRL0054	CCGTTCTGACGACGCTAAAG	2116	1233	1774	797	1009
Control	mCTRL0055	AAACTCCCGTGTCAACCGAT	3047	1458	2081	1074	1377
Control	mCTRL0056	GTTTGCGAGTCAAAGTACGC	2431	439	515	307	334
Control	mCTRL0057	GGGTGCACACGCCGGCCTAT	1829	962	760	799	1034
Control	mCTRL0058	CTTTATACCGCGCGTCGGCA	4820	717	834	538	654
Control	mCTRL0059	TCAAACGCCCGGGCGCCCCA	3264	545	879	601	766
Control	mCTRL0060	GACCGGTGTGTTTACGCGTG	5091	1027	1582	774	990
Control	mCTRL0061	CGGTGAGGATCCCTCTTGCG	2095	576	428	405	866
Control	mCTRL0062	ACGGTCCCAACGAGCGCCGG	2192	408	279	371	570
Control	mCTRL0063	CGCTTCATTGCCCGAACGCT	3857	553	810	479	670
Control	mCTRL0064	TTATACCGTCACGAGTGCCC	7056	753	647	569	570
Control	mCTRL0065	TGCACCGGTACGGGCGACTC	3711	1312	2089	931	752
Control	mCTRL0066	GAGGCGTACTTCGGCTCTAA	1017	581	549	545	905
Control	mCTRL0067	TTCGAGACGGATACGTCTGC	4403	297	234	237	206
Control	mCTRL0068	TAGCCCGTCGAGTACTCCCC	7376	227	213	146	258
Control	mCTRL0069	AGCTTAGATCGTGCGTCGTA	2984	2324	2603	2265	2834
Control	mCTRL0070	CGCCGGATGACTGGTGGATA	2628	1461	1881	1472	2154
Control	mCTRL0071	CCGTTTCGCCTATTGGTGCG	4773	775	879	735	1419
Control	mCTRL0072	TTCGACGTGCGGCGTATTGG	7551	813	1154	697	1204
Control	mCTRL0073	TTCAATTGTTCGCCCGAACA	2646	361	497	173	237
Control	mCTRL0074	GCGGATCTGACGGTTACTTA	1805	871	605	784	805
Control	mCTRL0075	AATGAAGCACCGATTGCGGA	1115	333	262	315	335
Control	mCTRL0076	TCCTATAATTGAGCGAACGG	2052	807	727	971	1119
Control	mCTRL0077	GCTACAGATTTGCGTTCGAG	2647	587	892	454	592
Control	mCTRL0078	GGACTGAAACCGATAGTATC	920	494	530	402	1180
Control	mCTRL0079	GCAATTCTGCAACGCACGTC	3458	448	343	441	578
Control	mCTRL0080	CACCCGACTCGGCCGTAAAG	2257	2167	2064	1762	2289
Control	mCTRL0081	CAACCGTGCGATGCGCGCTA	4543	683	942	462	444
Control	mCTRL0082	TGATGGACGCGATACGTTTA	4187	789	1178	768	1131
Control	mCTRL0083	TACCCCTTGAGGGGCGCATA	3649	733	1845	716	1616
Control	mCTRL0084	CCGTATACGTATCTATGCCG	3545	840	750	864	891
Control	mCTRL0085	ACAGCGGCCTAATACTTCGC	3584	351	356	277	369
Control	mCTRL0086	TATCGAACTGCACACGCAAC	4840	594	802	292	502
Control	mCTRL0087	TGTCGGACCCATTGTCGAAC	4062	915	910	964	1043
Control	mCTRL0088	AAACCTAGCGTAGATTCGGC	1283	512	617	337	496
Control	mCTRL0089	TAGATGGTGCTTCTGTCGCG	5981	373	432	407	724
Control	mCTRL0090	CATCGTAACACACGTACGAG	2154	439	317	321	278
Control	mCTRL0091	CAACGATCAGGCGTGTTATC	2640	392	395	296	451
Control	mCTRL0092	ACAGCAGGGGCCGCGAATAA	1448	386	171	255	458
Control	mCTRL0093	AGCCGGGCTTTCCGTCAAGC	1714	583	438	674	811
Control	mCTRL0094	ACGGTCCCTCTCGGGTCAAT	5441	379	478	465	661
Control	mCTRL0095	TCAATAGTTCTGCGCGAATT	3423	344	343	403	827
Control	mCTRL0096	TCGTTACATACCCCGCGGAA	3141	972	1277	587	982
Control	mCTRL0097	CATTCGGTCCGTTCATCTCG	6649	590	688	323	458
Control	mCTRL0098	TTCGGCTCAATGGCGCGAGC	3118	687	819	613	1005
Control	mCTRL0099	CATACCCGCGCCGTGACTCC	6526	632	751	453	320
Control	mCTRL0100	GGACGGATGGGACGACTAGT	1399	33	16	137	268
Control	mCTRL0101	GTGCAACGACTGACCCGCGG	2399	324	278	260	355
Control	mCTRL0102	CGACACTTGGGCTGACGCGC	3384	546	520	621	1310
Control	mCTRL0103	TGTGTAATTACGTTTCGCGG	4373	764	851	671	870
Control	mCTRL0104	AACCGTACTGCGAGGAGCAT	2377	355	266	504	910
Control	mCTRL0105	GATATTTACCGGCGATAAGA	836	528	888	346	525
Control	mCTRL0106	GCGACGTGTATCGATCACTC	4021	686	1088	609	1007
Control	mCTRL0107	TAATGGAAGATGCGCGATAC	3459	561	638	491	621
Control	mCTRL0108	TGTCCTACCGAATGAACCGT	4354	551	653	694	1441
Control	mCTRL0109	ACGCGAAGTGTCGCAGAGTG	2460	866	1119	841	964
Control	mCTRL0110	GCAGAGCGTAATCGGCATCG	3761	215	262	313	250
Control	mCTRL0111	GCCGCGCCATAATATGCCAT	4976	513	535	434	410
Control	mCTRL0112	CGAATGCGCCGGAGAATATT	1750	987	861	818	1157
Control	mCTRL0113	CCCGCCTGGCGATTCACGGG	3206	470	541	360	777
Control	mCTRL0114	AGCCTAGTCGCGCTAATATT	2908	761	783	865	1524
Control	mCTRL0115	GTGTGCCTCGACAGCGTAAG	1980	252	104	276	425
Control	mCTRL0116	TCATGCGCCTCGTAATACCT	6970	397	382	446	505
Control	mCTRL0117	TGTGCCACGCCGCTGCAACG	4250	754	488	697	1364
Control	mCTRL0118	GCAAATAGGTCGGAGCGTGT	2612	672	841	638	1070
Control	mCTRL0119	GGATAGCCCGGTTGGTGCGT	2068	426	592	337	380
Control	mCTRL0120	TCGCAAAATGCGGATTCCGT	3903	393	417	395	595
Control	mCTRL0121	GGTGCAGTCCGTTTAGTCGG	3598	940	801	681	866
Control	mCTRL0122	TGGGTTCCGGCCCCATGTAC	5216	912	1077	793	672
Control	mCTRL0123	CCTTCGGATTCGTAGGCTGG	2784	1085	1632	841	992
Control	mCTRL0124	TCCCCCGTACGTGTATGTCG	8534	1205	1352	1033	1207
Control	mCTRL0125	AGGTGCGTGTCAACCGGTAG	2129	787	700	719	879
Control	mCTRL0126	AAAAAGTCCGCGATTACGTC	2367	674	648	586	887
Control	mCTRL0127	TTATCGCACAACCCCGAAAG	2092	772	854	605	1279
Control	mCTRL0128	CACCCCGTAGCAACGATAAA	1471	1290	1236	921	1458
Control	mCTRL0129	TAACAGCTTCCGCGTAATAT	3390	1193	1394	1142	1998
Control	mCTRL0130	GCCATAGCCAATCGCTAGTT	3553	1333	1158	1077	1809
Control	mCTRL0131	CATCTATGAGACGTGCGTAC	3450	400	378	434	425
Control	mCTRL0132	TTGATAAACCGCGGCCGAAA	1201	65	44	21	80
Control	mCTRL0133	GTATCCTCGCAATCGTTAGG	2539	1055	1460	985	2009
Control	mCTRL0134	TGGCGCTCCTGCGCACACGA	1641	584	797	469	647
Control	mCTRL0135	TTCGAAGTCTAACCCGCGGG	2422	599	423	412	751
Control	mCTRL0136	GTTTCCCGGGACTGTCGCGT	4828	1687	1686	1184	1275
Control	mCTRL0137	AACGCCCCGGATTTCGTTGA	2613	495	341	623	1457
Control	mCTRL0138	ACAACACGCCGACACGTCTA	2792	749	790	698	1444
Control	mCTRL0139	TAAGCGGCGTCATGTCGCCC	5108	410	433	285	398
Control	mCTRL0140	CCGCCCCTGCGAACTGCGTT	4928	334	389	270	284
Control	mCTRL0141	TATCTAATCGCGGAGTCGTA	3241	506	426	366	464
Control	mCTRL0142	ACGCTATAGTGTACGTCTAA	1958	644	979	571	636
Control	mCTRL0143	GTAGACATATTGCGTAATCG	2203	837	1318	903	1568
Control	mCTRL0144	CGTAAACCATAACGTTGGTC	2136	767	943	674	969
Control	mCTRL0145	GGACGTAGATTAGGGCGTAA	1813	1077	1035	1223	2769
Control	mCTRL0146	CGGGCAATATGATCGTAGGC	1709	30	15	42	44
Control	mCTRL0147	GGACCAATGTTACCGTAGGT	1378	881	739	639	609
Control	mCTRL0148	CAGGGACGTAGCCGCCGTTA	3272	1501	1256	1258	2799
Control	mCTRL0149	AACCCCGGCTGTCATCGCCG	5052	782	637	631	780
Control	mCTRL0150	GATTCATTATCGGCATACGG	2724	2167	2644	1727	2340
Control	mCTRL0151	AGTCATCCTCTATGCGCGTA	3161	255	318	230	201
Control	mCTRL0152	CGTACGGGCGCGCCGTCCAT	5015	424	365	515	538
Control	mCTRL0153	TTGCGTGTGCGTTGTTAACG	5463	897	799	713	1109
Control	mCTRL0154	GACCATACGCCTCGTATGCC	4143	1217	1454	909	1359
Control	mCTRL0155	CGGCAATGTGTGGCGACCGC	4758	1888	2210	1574	2911
Control	mCTRL0156	TCGCTAAGCCGGGTAATACT	3099	1361	1029	1071	994
Control	mCTRL0157	TTTCTAATTACCCGATACGT	3501	699	638	629	829
Control	mCTRL0158	ACCAGGACTGCCGCGTGAGG	2350	656	541	477	491
Control	mCTRL0159	GCGCGTACATATAAATAGGT	931	409	538	373	384
Control	mCTRL0160	CTTATCCATAATAGGCGGCG	1337	303	396	232	453
Control	mCTRL0161	GTTATTGCGCCTTGGCCGTA	4999	689	560	591	1081
Control	mCTRL0162	TAAAAGTGGTGCGTCGTCGT	2632	329	246	414	650
Control	mCTRL0163	CTCGTGAAACAAGATCCGAC	1315	719	852	455	635
Control	mCTRL0164	TAAACGATTCACCGATAACA	1695	1764	2191	1564	2079
Control	mCTRL0165	CGGCCGTAGTGACGAATGGA	2228	304	399	343	315
Control	mCTRL0166	ACCGGTCGAAGTCTGGGATT	3527	519	548	459	431
Control	mCTRL0167	TCCGTACATCGACCTATTAC	6562	30	18	33	82
Control	mCTRL0168	CGACACGATGGTCATACTAC	2592	1575	1457	1152	1390
Control	mCTRL0169	ACTCGACCTAACGTCGATGT	2315	717	645	724	916
Control	mCTRL0170	TGCAGATCGCGAAGCGACTA	1279	442	471	344	358
Control	mCTRL0171	TCTAGGATACTCTTAACGGG	1021	1362	3316	1171	2185
Control	mCTRL0172	GGTCTGTCCGTTGCGACCAC	5220	725	726	397	636
Control	mCTRL0173	ACCGGACTGCGATATGCCGT	3633	1000	897	868	1087
Control	mCTRL0174	CTCGTATAGTATTGCGTGGT	3327	1197	1184	1035	1279
Control	mCTRL0175	CTTTAGTCACGATATACGTC	3486	957	951	1015	1591
Control	mCTRL0176	GCGGCCCGTGACCGTTCAAT	3930	1787	1885	1494	1844
Control	mCTRL0177	CCGGTTTATAAATTACGTGG	1718	841	1351	588	559
Control	mCTRL0178	CAGCTCACCCTGCGTACGGT	2165	598	638	572	946
Control	mCTRL0179	CTCGGCTTTACGATCGATCA	4090	525	346	463	329
Control	mCTRL0180	TCTGCACCGCGACTTAGCTT	3629	150	176	185	321
Control	mCTRL0181	GGCTTATAGACGAGACTCGA	1573	322	209	235	176
Control	mCTRL0182	ACCGGATGTGGGCGCCTCTC	3987	634	504	761	1087
Control	mCTRL0183	CATTACGTGTCGAGCTCCGG	4868	1168	732	800	954
Control	mCTRL0184	GATGCGGGTGGAAAACGTTA	1075	487	519	432	326
Control	mCTRL0185	GCAAAAAGCGGACACGCGAC	1738	224	255	370	613
Control	mCTRL0186	CGAGGATGTACATACGTAAA	1597	223	279	204	169
Control	mCTRL0187	ACACGTCTTCGGCTATACGC	6379	470	361	663	981
Control	mCTRL0188	TCGTGCCTAGCTCGGTTGAG	3273	595	807	532	473
Control	mCTRL0189	TCACACGGGATCTCGCCGGT	3292	1682	2657	1400	2272
Control	mCTRL0190	CGTGCGTTCGTAATAAAAGG	1376	1013	1169	686	784
Control	mCTRL0191	CCCCTTCGATATCCGATGAC	5382	348	319	286	384
Control	mCTRL0192	CGTGATTCCTAAGCCCCCGC	5627	1518	1317	1110	1731
Control	mCTRL0193	GCGTGCCATGGGAGGCCGTT	2280	1208	1049	1213	1654
Control	mCTRL0194	GGCTTTACGTAAGGAGCGTA	2046	777	827	637	904
Control	mCTRL0195	ACCCTAGCCTCATCGCGACC	3989	556	575	451	766
Control	mCTRL0196	GCTGATTAGACCCGGCGTAA	1724	519	499	403	544
Control	mCTRL0197	GTTACCCCTTTGGCCGGAAG	2602	616	746	848	1683
Control	mCTRL0198	TAACGTTATGTCAAACGCTC	1885	951	1288	734	994
Control	mCTRL0199	GGATCGATCCGAGGAACGTG	2483	993	1752	886	1857
Control	mCTRL0200	CTGCACGGCACGACATCCAA	3156	893	1169	1094	1948
Control	mCTRL0201	GGTCAAAGCGATGTTAGCCG	1342	774	1131	610	651
Control	mCTRL0202	GCTTGTAATCTAAAGACGCG	1169	1716	2484	1320	1860
Control	mCTRL0203	GAGATTAAATTAACGCCGGC	461	418	381	443	808
Control	mCTRL0204	CGAATCGGGAAGGCGCGTGT	1495	649	491	728	1370
Control	mCTRL0205	GGGACGCTCATCGAGTGACG	1804	454	527	417	515
Control	mCTRL0206	AGCGCGTAAGGCGTAGTTAC	2000	1270	1461	863	1087
Control	mCTRL0207	GTTTCAGCGCGAGTTGCGCG	4905	9	5	40	56
Control	mCTRL0208	TCCTGCGTTCCACTCGTACT	7678	472	435	564	1443
Control	mCTRL0209	GTTATTTGTCTGTCGAAACG	2067	613	438	627	918
Control	mCTRL0210	AATAAGCCTACCCGGCGAGA	1496	719	601	846	1108
Control	mCTRL0211	GTACATGCGGCAAGTCGACT	3527	727	573	665	898
Control	mCTRL0212	AGCAGTTCGGGTAACGCCCA	2063	1059	1009	1165	1769
Control	mCTRL0213	TGTACTCGCATAGCGGGGGC	3230	257	164	221	249
Control	mCTRL0214	AACTCGCGTGGGAAGTCCGG	1943	790	833	895	911
Control	mCTRL0215	CCTTGTGGCGTGCCAAACGA	2106	809	881	714	835
Control	mCTRL0216	TGCCGACGCGACGCAGCGTA	4824	2174	2695	1893	3978
Control	mCTRL0217	TGCGGCAATGTTAACCCTTA	2652	667	480	484	657
Control	mCTRL0218	TGTATAGTCATCGCCGTAAT	5163	546	818	435	431
Control	mCTRL0219	TAGGCGGACGGTTACATATA	2719	1301	1357	1200	1118
Control	mCTRL0220	GATAAGACTCCGCGAGCTTC	1770	951	1235	922	2830
Control	mCTRL0221	TCGTGCCGGAATAACCACTA	2986	1079	974	855	1231
Control	mCTRL0222	CGAGTAATTATTTGCGGTCG	2082	1861	1962	1714	2912
Control	mCTRL0223	TACTTACCGACCGACAAACG	2562	690	808	423	592
Control	mCTRL0224	ATGGTGGCTGTACTCGTAAC	3667	1130	1246	893	1222
Control	mCTRL0225	TCGTAAGTTCGCTATATGCC	6135	730	759	743	628
Control	mCTRL0226	CCGGCTTGAATACCGTGCGG	1452	342	259	275	955
Control	mCTRL0227	GGCCCAACGAAACTAGCGTG	1601	867	1055	1054	1678
Control	mCTRL0228	AGCCGCGCCGCAAAGCTTTT	2671	1160	1273	603	666
Control	mCTRL0229	ACACGACCGACCGGTGGAAT	2069	329	459	298	287
Control	mCTRL0230	AAACTCATACGTAGCGAATC	1525	1166	935	1140	1925
Control	mCTRL0231	CGATTGACGTTGGGCTCTCA	4635	1483	1947	1210	1635
Control	mCTRL0232	AACCAGCATTTGACCGCGCT	3270	1698	1702	1330	1789
Control	mCTRL0233	ACGTCGGTCTAGAGTTAAGT	1730	1054	863	839	1415
Control	mCTRL0234	CTCCGGACGTGCATCCGAGA	3678	555	717	513	574
Control	mCTRL0235	ATAAAGTCCCAGGTGCGCGC	2087	1261	744	913	1240
Control	mCTRL0236	GCCGCTCTTGATAACGACGC	1658	831	962	729	818
Control	mCTRL0237	CGAAACCATACCTCCTTCGA	3836	459	513	418	579
Control	mCTRL0238	CGCGCCTACCCTTTTACCGC	6861	713	509	644	983
Control	mCTRL0239	TACCCCTCTGCGATGCCGGT	4391	283	285	136	174
Control	mCTRL0240	ATATTGTCCCATACGATCGG	2445	349	306	266	427
Control	mCTRL0241	GGATTGACGAGACGATATCG	1326	592	794	532	719
Control	mCTRL0242	CACGTAAGACGCTCCACTTA	2978	1638	1495	1357	1378
Control	mCTRL0243	GGAGTCTCACGCAATTAGCG	2399	624	983	552	1574
Control	mCTRL0244	ATCGCAGGTCTACGCAGAGT	2552	878	1033	719	1085
Control	mCTRL0245	CGGTCGTGACAGACCTGGTG	2119	709	537	683	961
Control	mCTRL0246	GCCACTCCGCTCGTTCTAGA	2933	1796	1396	1466	2080
Control	mCTRL0247	CCGTCGAGCAATCCCGCCAA	3242	1048	1094	1101	1645
Control	mCTRL0248	GAGTCGAGTTAATAACGCTC	977	438	689	345	490
Control	mCTRL0249	CAATATCTAAGCGCTAACGA	1445	566	871	360	521
Control	mCTRL0250	ACCCATCCCCGCGTCCGAGA	3842	681	813	862	1397
Control	mCTRL0251	TAATGAGTAACGCTCATCGG	2302	170	133	206	311
Control	mCTRL0252	AACGGTAGCGTACCCGTGAA	2544	549	1799	503	611
Control	mCTRL0253	CATCGAGGGTAAACGCCATT	2846	474	422	526	748
Control	mCTRL0254	CGTCACCGCTAGTAATGATG	3067	972	1036	917	1197
Control	mCTRL0255	AATCACCGACAACGTAAGAC	1268	564	457	572	594
Control	mCTRL0256	CACTCAGCGGTTGGACGCCC	3058	272	179	335	291
Control	mCTRL0257	TCCGTAGGACGTATATATTC	1130	535	515	536	565
Control	mCTRL0258	AAAACGTAATTATACCGAGC	680	414	605	454	966
Control	mCTRL0259	TAGGCCGCTCAGGCCGCACT	2589	2289	2017	2075	3095
Control	mCTRL0260	CCCACTTAATAACGCCGCTT	3424	824	992	503	846
Control	mCTRL0261	ACCATACGGGGTCTTGTCGA	2827	208	111	323	452
Control	mCTRL0262	ACGGAACCCGATCGGAACGG	1727	757	911	640	866
Control	mCTRL0263	GTTGCGTCCATTCCGTCGCC	3729	676	632	547	675
Control	mCTRL0264	ATTCCGTTTGCAGCGAGACC	3611	320	325	232	278
Control	mCTRL0265	CCATCGGTTCGACTTACCGC	5584	1342	1736	1080	1273
Control	mCTRL0266	CATCGGCTATGTCGGGGACA	2659	1133	1111	946	1180
Control	mCTRL0267	AATGAGCGTCTCTCGATCGC	3133	699	591	698	1011
Control	mCTRL0268	TTACTGATCAGTCGGACGCA	3190	2292	1917	1935	3312
Control	mCTRL0269	GATTGAGAAGCCGCGGTATC	1629	715	1308	589	592
Control	mCTRL0270	GTGATGGCCACGTCCGAACC	2943	862	750	920	1373
Control	mCTRL0271	TTGGACGTACACTTTCGTTC	4856	278	224	440	404
Control	mCTRL0272	ACTGCGCGTATAGGACGCAA	2171	1151	1193	1079	1434
Control	mCTRL0273	TAGCTGTTTACGCCGACCTG	4747	710	512	569	449
Control	mCTRL0274	CATGCCCGTCTGCGCCGCAT	7067	1441	1718	1386	2301
Control	mCTRL0275	TCAACTATGAACCGCCGTGC	4502	678	510	562	753
Control	mCTRL0276	CGTTACGTTTCTTGCCAGGA	3904	385	299	531	878
Control	mCTRL0277	TCTATATCTAGTCTCGGCGC	2384	739	462	606	735
Control	mCTRL0278	CTCCTCGAGGCTGGCTACGT	5483	507	471	493	801
Control	mCTRL0279	TCGTACCGCACGTGTAAGCC	4815	239	389	228	946
Control	mCTRL0280	CGGGCACTAACCCGATACAC	3239	960	1504	832	1376
Control	mCTRL0281	GAACGTAACGGCATGCATCA	2430	1390	1789	961	1361
Control	mCTRL0282	GCCCGATAGAATTACCCATT	2605	322	223	177	284
Control	mCTRL0283	GCCCTCGAGCTCACGATGAG	3403	607	402	683	932
Control	mCTRL0284	TTAGGACGTGCTTCCGAGGG	2721	1313	1156	1074	1512
Control	mCTRL0285	TAGTTAACCGTAAAGTGGGC	1814	1163	942	798	923
Control	mCTRL0286	GTGGGCTGACCGTTCTCGAC	3365	1018	1025	574	725
Control	mCTRL0287	CAAGAGTTAACCTCGACCGG	1235	1864	1739	1550	1642
Control	mCTRL0288	TATGACTGCACGACTCGCTA	2709	3	11	5	4
Control	mCTRL0289	GAACCGGCGTGCGTTAGCGG	3062	658	605	367	435
Control	mCTRL0290	TTCGATATAGGGGACGGCGG	2530	757	766	697	747
Control	mCTRL0291	GCCGTAAGCGGGCCGGTTGA	181	533	441	674	709
Control	mCTRL0292	CGTAACCGGAGATAATATTA	1197	391	315	283	361
Control	mCTRL0293	CGGCGATAACAGCGACATCG	1450	623	667	574	783
Control	mCTRL0294	TCACTTCGGGCATTACGAGC	2781	409	457	308	420
Control	mCTRL0295	TAATAAACTATGTCCCGCCG	2972	540	372	488	475
Control	mCTRL0296	TGGCACGGAGTTGCATACGC	3569	58	125	106	92
Control	mCTRL0297	GCTAGTTCTCCCGGGCGAAA	1185	382	431	382	512
Control	mCTRL0298	GTTCGGTTGCAGCTTACACG	5165	340	390	544	852
Control	mCTRL0299	GCACCTCTAGCGCGCTCGGC	3334	1244	1282	897	1588
Control	mCTRL0300	CATTGTAGACTCGTACGGAT	2851	220	139	219	373
Control	mCTRL0301	TCGGAATTCCGCAGGCCGAG	2001	318	359	360	414
Control	mCTRL0302	GATTACGGGGTTCCGTAACT	1326	851	922	703	937
Control	mCTRL0303	GCCTATGTGAATCGCGAATT	2829	524	587	556	507
Control	mCTRL0304	CTCGGACGGCATACGACAAT	2914	847	742	708	810
Control	mCTRL0305	CATATGCTCGACGGTATAAA	1088	692	865	554	960
Control	mCTRL0306	CTCATGTACGCCTTCGCTAC	6406	1439	1525	1106	1623
Control	mCTRL0307	TTACAGTTCATACCGTCGCC	5492	346	280	299	398
Control	mCTRL0308	GATGGCCAGTAACGGCGTCA	2325	238	328	137	112
Control	mCTRL0309	ATTTGAATGCTCCCGTCGAC	3621	541	360	483	423
Control	mCTRL0310	CAACGGTCACGCTAGAATAA	1319	954	946	713	989
Control	mCTRL0311	CTTAAGTTCGCGACGGAATG	2737	431	427	434	698
Control	mCTRL0312	TACTTAGGTCCGCGTAAAGC	2790	209	132	188	209
Control	mCTRL0313	GGTTAAAAATTAAGCGGTCC	726	829	925	689	1384
Control	mCTRL0314	AAAACGGCTCGATCGGTGAT	1384	998	1081	655	637
Control	mCTRL0315	ATGTTACGTACGTGATCTCC	4289	1644	1905	1306	1676
Control	mCTRL0316	AGTAGACGCTATGTTCGCGC	2958	1183	1014	725	1184
Control	mCTRL0317	TACTGCGTACCGCAGTAAGC	1138	936	1155	867	885
Control	mCTRL0318	CCCATCATTCGCGCTGACGT	6192	526	503	418	447
Control	mCTRL0319	CGACTATTGCCGTCCATCTC	6261	669	552	664	1175
Control	mCTRL0320	ATCCGTACCAAACACGCTAC	3221	989	1197	641	898
Control	mCTRL0321	TGCGTAAAACTTGCGCTCGA	1833	906	1364	863	1823
Control	mCTRL0322	CATATGCCTATAACCGGCGG	1855	1498	2342	1255	1714
Control	mCTRL0323	GTTCCGGATATATACGGTTA	1682	576	680	604	909
Control	mCTRL0324	CTAATACACCCGGACGGTAC	2874	1374	1308	1202	1517
Control	mCTRL0325	GGGCGGGACGTAATATTATG	1406	850	651	698	948
Control	mCTRL0326	ACTTTACATCATGTCGTCGT	2192	700	708	407	450
Control	mCTRL0327	CTGATCGGTGCATATCTCGG	4476	519	389	424	599
Control	mCTRL0328	GAGCCCCAACGCGCGAAGCA	1296	826	618	601	961
Control	mCTRL0329	GCTAAGATTCATCCGAACAC	1628	363	322	328	399
Control	mCTRL0330	GTTACCGTGACGATAAGAAT	1972	885	701	579	983
Control	mCTRL0331	GCTAAACGTATTTTACGGGC	1399	598	676	627	906
Control	mCTRL0332	CCGAGCCGAATTGGGCGTGT	1616	1067	1007	951	1761
Control	mCTRL0333	GTTGCGTGTGTCCGTACAAA	1975	705	685	395	519
Control	mCTRL0334	CTTTATTCCGTTGCATGTCG	7845	625	625	409	661
Control	mCTRL0335	AAGCGTACCCCACTCGTTAA	3166	854	980	969	1389
Control	mCTRL0336	ATCCGAGATCTGCGAATTAT	2630	1091	1048	1085	1041
Control	mCTRL0337	TCTTGACTCCGACTTCGGGC	3975	666	851	484	665
Control	mCTRL0338	ACCATGATGTCACCGCCGCA	4062	369	353	363	906
Control	mCTRL0339	TCAACTTAACCTCGAGTCCG	3973	1360	1759	1111	2647
Control	mCTRL0340	CTACGAGGGCCGCGAGCGGT	356	337	363	311	521
Control	mCTRL0341	ATGTGTCATAGCGGCGTAGG	2236	594	508	689	838
Control	mCTRL0342	TGTAACGATCTGGGCGGTCT	5115	976	1111	980	1438
Control	mCTRL0343	CCGGATCGGCTACGCTACGG	3255	919	697	1130	1023
Control	mCTRL0344	CAATATTCGACCTACGCTCC	4610	692	661	578	1397
Control	mCTRL0345	TGATAAACGATGCGAACTCG	2691	271	212	256	191
Control	mCTRL0346	TGATTGGGGGTCGTTCGCCA	4994	286	341	243	430
Control	mCTRL0347	TAGTCAGTCGGCCTCCGTGC	7203	2284	2011	1666	1913
Control	mCTRL0348	AACCGGCTGCGCGTTTGCAA	2834	931	780	775	1207
Control	mCTRL0349	GTGCCTGATAGTGTGAAGCG	1699	907	859	532	586
Control	mCTRL0350	CGACGACCCATTTCGGTTAT	5068	752	723	913	900
Control	mCTRL0351	GGGGGGTCTAATACCGATTG	1	2564	4249	2122	2414
Control	mCTRL0352	TTTTTAGACCTAATTCGCGC	3023	286	204	199	259
Control	mCTRL0353	TCTACACGCGCGTTCAACCG	5152	712	656	455	417
Control	mCTRL0354	CGGGGCGTACATGTGTGGCC	3685	642	454	341	470
Control	mCTRL0355	CGACTCGCTTAACCGTGCAG	2276	1002	816	651	707
Control	mCTRL0356	GCGTACCTATCGATAAACCA	2106	1248	1461	1243	1553
Control	mCTRL0357	ATATGAGCCCGACCTCTCGA	3076	720	738	637	746
Control	mCTRL0358	CGCGCCGAGGGCCTCGTTAC	6134	292	328	266	320
Control	mCTRL0359	CTCCGACGACTACGCAAGGA	1531	550	446	511	529
Control	mCTRL0360	TATCTCTGGATGCCGTCGGT	1813	823	1067	472	566
Control	mCTRL0361	TTTCAGTTGTCGCGCGACTC	5671	1007	839	980	1729
Control	mCTRL0362	AGTTTACGTGGTCCGATGTC	4206	690	542	590	573
Control	mCTRL0363	GCGTGACGCGATCAAACGGT	1153	96	86	84	179
Control	mCTRL0364	ACTAGCTCCATAACGTGTAC	1002	613	609	687	856
Control	mCTRL0365	CGCATAGTGTACCGTTGCGC	2940	894	1043	674	1513
Control	mCTRL0366	CCGCTTGGGCGCTATTAATT	2462	455	966	438	369
Control	mCTRL0367	GCTTCATTATTAACCGGCGT	1961	156	846	182	233
Control	mCTRL0368	TATACTCGCCTGTCACAGCG	4703	829	729	743	1309
Control	mCTRL0369	ACGCTGTTCGTAACCGCGGG	2286	273	226	414	1067
Control	mCTRL0370	AGACGTTGATTTACCGGCCA	3024	169	233	121	197
Control	mCTRL0371	AACGGTCAAATCCGTGAGGG	272	884	921	809	865
Control	mCTRL0372	CATAGCAACGCCCAAACTCG	2568	958	1417	697	804
Control	mCTRL0373	CGTCAATGTGTCCGGACGGT	2158	460	401	345	339
Control	mCTRL0374	ACTGTCCCATTGTACGACGG	3147	1032	2102	951	1221
Control	mCTRL0375	CTATCGGCCCGCAGTGATGG	5613	605	764	648	1036
Control	mCTRL0376	GATCGAGTGACACCCACCCG	2200	530	450	420	577
Control	mCTRL0377	TCCGCGGCAACGTTTGGGTC	6830	455	478	415	362
Control	mCTRL0378	ACTTGTATACGACGGCTAGA	1688	564	602	418	457
Control	mCTRL0379	TTCGACTGCGCACGCCATGA	6956	1240	1541	1116	1649
Control	mCTRL0380	AGCATGGAGTCAACGTCCGC	3172	453	515	499	821
Control	mCTRL0381	TGACTTGACACGTTCGATAT	3078	668	786	562	895
Control	mCTRL0382	CCGGACTTGTTATACTTGAT	2192	45	64	30	53
Control	mCTRL0383	GTACCATGATAACCGTACTA	704	454	359	348	392
Control	mCTRL0384	CACCGCTGCCCTAGTACCGG	5508	375	420	285	1087
Control	mCTRL0385	GGATATTCGCGCGGTCTTCA	2486	427	329	382	411
Control	mCTRL0386	AGGCAGCCCGCGTTAGAGAT	1677	323	281	341	580
Control	mCTRL0387	TTCTCCATACCGTAACTCCG	6360	445	943	487	1558
Control	mCTRL0388	ACCCGCATATGCCGCCTAAG	2706	642	895	501	589
Control	mCTRL0389	CGAAGTACACGGTTCTCTCG	2711	361	236	526	804
Control	mCTRL0390	CACAATACGCGGCAGAGGTC	2230	700	681	491	575
Control	mCTRL0391	TGAGACCAATGCCGCGGAAT	3300	336	241	510	694
Control	mCTRL0392	CTCGACCCAGTAGTAGACGG	1442	1096	1092	1160	1565
Control	mCTRL0393	CGTACCGACAGTAGTCCAAG	1924	845	1106	634	3367
Control	mCTRL0394	AATTGTCTGATCGCGCCATA	2157	286	305	196	403
Control	mCTRL0395	TTTAGTCAGACGAGCCGGAT	1576	793	747	820	1112
Control	mCTRL0396	TGCGCGTCCTGTTATGACCG	5565	973	1194	899	1035
Control	mCTRL0397	CTTATCGATTTGGGTTCAAC	3505	639	605	536	590
Control	mCTRL0398	AACATGTTAAGTCGCGTTAT	2395	774	1077	645	947
Control	mCTRL0399	TACGACATCGCATGGTAACG	1980	883	777	707	1937
Control	mCTRL0400	CAGCTGACCGTTAATCGATA	2592	468	350	443	730
Control	mCTRL0401	TACACGCCCTAAGCTAGTAA	2372	585	840	536	834
Control	mCTRL0402	CCGACTGCCGAGCTAGGCGT	1678	738	640	665	809
Control	mCTRL0403	GTTGCGGCGACCTAGATATC	2863	693	721	553	458
Control	mCTRL0404	TAGACGTCCACCGACTCTGA	2927	541	398	508	848
Control	mCTRL0405	TCACGCACGACTAAGGGAAT	1628	748	1468	445	689
Control	mCTRL0406	GCTTATCGTTCCGCTACGAT	4237	565	484	478	462
Control	mCTRL0407	ACCGGTTCAGCCGCCGGAAC	2133	753	593	635	1122
Control	mCTRL0408	CTACCCGTCTATTACGATCT	4433	771	757	637	764
Control	mCTRL0409	TGTCGCCGATGGTCAGTCGC	7125	342	498	180	256
Control	mCTRL0410	CGGGCGGTAAGAGCTCTACG	1155	702	674	576	1076
Control	mCTRL0411	GGCACCGTTCGGAAACCGAC	2087	1225	1954	809	783
Control	mCTRL0412	TCTCGAATAAATTTTCTCGC	2054	939	686	790	1217
Control	mCTRL0413	GCATTCTTGAGCTCCGCGCC	5619	606	977	559	1165
Control	mCTRL0414	ATTCGGACCGTTATCTCACC	4613	835	1098	683	762
Control	mCTRL0415	GTTCTTCAAAGACGGGCGGC	1054	509	750	344	725
Control	mCTRL0416	TTCCCCGCCCGTGCGGTCAT	7411	756	756	643	701
Control	mCTRL0417	TAGTAGGTTGATCGCGTCGC	4439	225	194	261	331
Control	mCTRL0418	CGCTCGGTGACGTATACACG	2800	1466	1363	1158	1411
Control	mCTRL0419	ATTATAGCAGCCCCCCGAAT	1856	422	459	390	556
Control	mCTRL0420	CGGTCAGTCGTCTTCCCGGA	3022	648	621	805	973
Control	mCTRL0421	TGGATCCGCTTCGCACGGCG	3062	292	275	388	344
Control	mCTRL0422	AAACCCCCGCGCGGAGCGTC	1587	760	802	678	808
Control	mCTRL0423	CATAGATCCGCGATTGTACG	1953	176	209	168	175
Control	mCTRL0424	GTTTCAGGAACGACGGCGAG	1513	905	1238	538	967
Control	mCTRL0425	ACCGTCTCTATTATACGGCA	1861	882	1821	582	732
Control	mCTRL0426	TGTTCGCCCTCTCACGATTG	4517	356	720	342	2753
Control	mCTRL0427	AACTAACTCACTACGCACGA	2340	406	258	360	475
Control	mCTRL0428	TCGCTCCGCTAGTAGTGGGT	2637	627	611	517	476
Control	mCTRL0429	TCGGCGCAGCCTAATGTATA	1824	838	1248	921	1519
Control	mCTRL0430	CAACCTGCCTAGCGACCCGC	5275	216	125	154	207
Control	mCTRL0431	GTCGGCTCATCGGAAAATAT	1216	808	676	753	1045
Control	mCTRL0432	GACAGTTGACGCGACGGAGA	1139	567	792	606	896
Control	mCTRL0433	CCCTGATGTGCTATACGCGC	3654	202	256	267	340
Control	mCTRL0434	TAACCCTTGATCAACCGATA	1771	103	152	153	124
Control	mCTRL0435	CTATTGGGAGCGGCCTCTCG	3253	415	286	358	1247
Control	mCTRL0436	GCTTATCGTCATGCGGGTGA	2653	204	219	152	68
Control	mCTRL0437	TGATGCCGGTACCCGTAACT	4695	2312	2383	2049	3015
Control	mCTRL0438	GGCGCTACTGTAATGACGGT	1014	665	496	1001	2355
Control	mCTRL0439	ACGGATTGCTGACGCTATCA	2548	546	450	466	1151
Control	mCTRL0440	TAATGCGAATGCGACCTCTC	4070	800	1108	832	1391
Control	mCTRL0441	TTAACTGGGGGGACCGGACG	1489	205	945	309	382
Control	mCTRL0442	CGCAGAGTTCAAATCCGCGC	1335	414	341	453	534
Control	mCTRL0443	TGTTTATGCGGAACTTCCGC	4877	1024	970	892	1566
Control	mCTRL0444	ACAGACCGAATAACCGACGA	1493	296	317	379	956
Control	mCTRL0445	TGACGCTAAGGCCCGCTAAC	4206	249	344	164	190
Control	mCTRL0446	ACTCGCGAAACCGTACATGA	1463	1038	1167	812	668
Control	mCTRL0447	ATAGGCGCACGGGCTACTCC	3835	575	665	363	552
Control	mCTRL0448	AGATTCTCGCGTAACCAGAG	762	223	154	212	314
Control	mCTRL0449	ACAATTCGGTTTATGCGCGT	2989	262	645	257	541
Control	mCTRL0450	CGGGTTATAGATAGTCGTCG	1570	360	584	376	731
Control	mCTRL0451	AGGGTTAGGCTGACCCGCGA	1582	303	321	191	341
Control	mCTRL0452	AGCTATCCCCACGTTCGCGG	3433	708	905	569	744
Control	mCTRL0453	ATCATGCCTTCGCATTAACC	3285	1017	725	704	989
Control	mCTRL0454	TGGGTCCTAAACGCGGTTCA	2305	1028	1154	1027	1117
Control	mCTRL0455	CATACTGTTATCGACCCGCA	3065	1539	1558	1266	2277
Control	mCTRL0456	TGAGCGCTTTCCCGATCCGG	3329	286	209	186	237
Control	mCTRL0457	GCCTTCCTCGCAGACCCGAC	5010	844	803	729	2240
Control	mCTRL0458	CCCTTAAAGTGACGGACGAA	855	483	479	447	526
Control	mCTRL0459	TGGTTCGACCAACATGGTTC	2703	635	529	547	694
Control	mCTRL0460	TGGGCCATAGTGGCGCGTGA	2167	1181	1120	1274	1324
Control	mCTRL0461	TCATATTAGACAATCTCCGC	3242	1436	1740	836	1097
Control	mCTRL0462	TAGCCGAGTTCACGCCAGTA	2562	321	531	262	418
Control	mCTRL0463	ACCAGGCGCGGACCGCACAT	3351	205	207	197	441
Control	mCTRL0464	GCGCGAGTGCCAAACGAGTG	1437	222	169	167	145
Control	mCTRL0465	AACGGCTGCGCCCGCGGCAA	1758	1120	1385	720	862
Control	mCTRL0466	ACGGTCGAGCACGGTTATGA	2135	140	192	119	153
Control	mCTRL0467	TCATGTTGCGTCGTCCGTTA	4002	712	922	658	943
Control	mCTRL0468	CGCTCCGTATCCTCTCATAA	3540	506	530	522	614
Control	mCTRL0469	AAACGAGGCTGTTCGTACAC	2246	562	585	371	361
Control	mCTRL0470	CACGTATACTTAGGTCAGCG	1755	367	417	400	330
Control	mCTRL0471	ATCGAGCACCGAGTTGTGAT	2824	772	743	816	1312
Control	mCTRL0472	TCACTTTAAGCACCCCGCGC	4792	553	570	413	467
Control	mCTRL0473	CTACTTGTGACGACCTCGCG	4551	284	121	152	252
Control	mCTRL0474	CTACGGATAGGCGCGGGTGA	1644	681	745	616	749
Control	mCTRL0475	GCTTACCTACTCCGCCCCGC	6266	384	390	374	1248
Control	mCTRL0476	TAACACGCACTCACGTCCGG	3743	631	703	337	401
Control	mCTRL0477	ACTCACCTCGCACGATCGTA	2513	289	260	134	137
Control	mCTRL0478	ACACCCGTGTATGCACCGGG	2269	385	424	240	261
Control	mCTRL0479	GCATAACGGCCGAGCACCAC	2475	487	474	471	916
Control	mCTRL0480	CCAGCGGACGGCGAACTCCA	1427	634	782	555	555
Control	mCTRL0481	TGACCCTCTTAATCTCCGGT	2748	707	533	595	608
Control	mCTRL0482	CCCTAAACCATAGTTTCGCC	2064	441	346	427	626
Control	mCTRL0483	CCCTAGCTCGGTTAGAGAAT	1260	765	1088	627	691
Control	mCTRL0484	GAATTGAGCCGCAACTCGGC	1643	1627	1756	1298	1905
Control	mCTRL0485	TGCTTAGGGCCCTTCGGCGG	4427	912	1078	946	1678
Control	mCTRL0486	TCTCCGGGCCGTGTTAGACC	3108	385	196	284	377
Control	mCTRL0487	ATCACACGTTAAACGGGGCG	1714	605	686	466	658
Control	mCTRL0488	GATCCCCTACGCTTCAACCT	4061	814	824	771	1084
Control	mCTRL0489	TTATTTACGCGCTGAACTTG	2703	392	418	265	2137
Control	mCTRL0490	ACCGTTGTTTCCGTCGAAAC	2270	909	984	1243	2436
Control	mCTRL0491	CGAGACGAATCCATCATGCG	1557	737	783	563	850
Control	mCTRL0492	ATATGCTCGACCCATCGTCC	2982	619	652	621	924
Control	mCTRL0493	AACCTCGTCTCATGTACGAA	1552	714	502	786	890
Control	mCTRL0494	AATTTTTTCGGAATCTAGCG	738	221	136	263	460
Control	mCTRL0495	AGCGAGTGTCCGTGACGTTC	3782	284	180	239	406
Control	mCTRL0496	AACGTCACCAACCTCGATCC	3293	1459	1467	1082	1235
Control	mCTRL0497	GTCCTAGATCCTATCGGGAG	2064	150	186	187	259
Control	mCTRL0498	CATATACTCTTGCGCTAGAC	1881	717	605	782	996
Control	mCTRL0499	ACGTCGATGCTTATCCGTCT	3703	1751	1799	1485	3522
Control	mCTRL0500	CCGCGCATTAACGATCAGTA	2915	707	532	624	853
Control	mCTRL0501	CCTATTAGTCCGGTTTAGTC	2873	816	916	604	706
Control	mCTRL0502	ACCTCGTGCAAATCGGTGGC	3113	778	846	758	1208
Control	mCTRL0503	CACGCAGGAGCGGCGACACT	1848	1313	1093	1503	2195
Control	mCTRL0504	GTCGGCCGCTTAACCCTTTC	4519	398	538	177	230
Control	mCTRL0505	TGATCAACGTCGGTGGACGG	2680	396	282	378	333
Control	mCTRL0506	GAACCACGAGCGAGCGTATA	1049	1284	1656	874	1235
Control	mCTRL0507	GAACCCGGGAAACACGTCCG	1450	341	294	448	486
Control	mCTRL0508	GGAAACGTTACATTCGACGC	1560	471	561	375	401
Control	mCTRL0509	AATAGGAACTCCGCACCCGA	1634	605	650	631	720
Control	mCTRL0510	GTAGTGCGTGTGATGTCGGG	2642	857	884	966	1746
Control	mCTRL0511	TTTGACATTTTCGTCTCGCG	3967	1253	1119	1221	1222
Control	mCTRL0512	AGGTCCGCTGGCGCAATGGG	2314	706	838	515	629
Control	mCTRL0513	CCGCCCGGGTGTGAGTTGAG	2224	724	762	673	484
Control	mCTRL0514	GCCGAGAGGCGTAAGCGCGA	1754	1034	962	795	1709
Control	mCTRL0515	TAATTCGCAACTCGGATCAT	2992	1502	1095	990	1616
Control	mCTRL0516	TAAGACTGGGTGTCCCGCGT	2489	774	979	448	559
Control	mCTRL0517	TTACGCAAAGCTGCGATGAG	1992	327	303	268	329
Control	mCTRL0518	GGACACTCGCCGACCCCACT	2580	906	865	810	1704
Control	mCTRL0519	TACGTCTGCGCAAATAGAAT	1522	941	792	647	1304
Control	mCTRL0520	ATACGCGTGATGACCTTATG	3748	855	976	667	1282
Control	mCTRL0521	CGCGCGACTGCAGCTAATCT	3275	938	5105	545	1241
Control	mCTRL0522	ACTTCCCGCGGTTCCGTTGA	4415	193	218	267	302
Control	mCTRL0523	TTATGACCTCGATGCGACAT	3049	963	774	904	1023
Control	mCTRL0524	TGACGCGCCTCGGACCAACC	3896	650	484	524	525
Control	mCTRL0525	TATCCCGATCCGGAAACTAG	1433	2225	2278	1730	2375
Control	mCTRL0526	AGTACACTACATCGACTTCG	1630	354	292	302	500
Control	mCTRL0527	TTCCAGTATACCGAATTCGC	3538	719	1263	438	527
Control	mCTRL0528	CCCGGCAGACTAACTAGCGC	1194	657	1127	470	490
Control	mCTRL0529	GCAACGGACAGTCATCGAAC	1337	684	920	585	649
Control	mCTRL0530	GCTAGCGTTCAGCCCGATGT	2221	630	517	459	926
Control	mCTRL0531	TATGAACTAGGCGTAAACGG	1091	968	1049	986	1307
Control	mCTRL0532	CGCGCGGATATTTAAACTTC	1306	597	318	488	558
Control	mCTRL0533	AAGCAGCGACTACTCGACGC	2080	539	538	429	632
Control	mCTRL0534	CCCCTATAGGCGCGCTAAGG	1259	1186	1094	853	1015
Control	mCTRL0535	CCGAGATGGCTCGGATAGAC	2268	534	772	510	584
Control	mCTRL0536	AGCACGCGCACAAGAGCCGC	2220	155	105	77	95
Control	mCTRL0537	TCGTAAAGTCGCAGCGACGT	1686	349	312	310	369
Control	mCTRL0538	GTCTAACATCGGCGCACGTG	3605	973	822	1017	1444
Control	mCTRL0539	TTCAACGACGGAAGACGCGC	2426	562	516	751	1213
Control	mCTRL0540	CGCTCGGTAAGGTCGATTGG	3794	394	679	285	407
Control	mCTRL0541	TAGGGGTGCGCATTAGACTA	1676	302	498	267	368
Control	mCTRL0542	GCCCGACCTCCACGTAAATC	2517	610	775	623	854
Control	mCTRL0543	TATGAAACATCTCGGCGACG	1551	739	1093	720	999
Control	mCTRL0544	CTGCTTGAACGCCTAGACGG	2826	503	340	420	378
Control	mCTRL0545	GGGCCGGCACTCTGTCGGAC	2022	667	433	442	1238
Control	mCTRL0546	GCCGACCAACGATGACCACG	2191	747	720	784	1380
Control	mCTRL0547	ATCGCGGCGCGTTAAGGCAG	3133	817	1089	537	876
Control	mCTRL0548	CGACGGTTGTGCTGAGGCTT	4856	932	1048	1071	1395
Control	mCTRL0549	CGGATCCTCCCGTACTATCC	6957	490	509	452	2086
Control	mCTRL0550	CCATTAGTACGAACATTGCG	2507	1099	943	859	2125
Control	mCTRL0551	GCTCATACTGATGAACGTCC	3131	1036	1239	607	611
Control	mCTRL0552	GCCGAATCGCGTTATTCCAA	3476	1417	1433	1230	1850
Control	mCTRL0553	CAAGGATCGTGCCGTGATTT	5369	421	514	420	517
Control	mCTRL0554	GTTAATATTGTGGCCCGCAC	3952	145	122	90	192
Control	mCTRL0555	CCAACCCGGCATCGTCCGCT	5410	369	320	354	341
Control	mCTRL0556	GCGAGCGCTATCCCGGTGGA	3172	302	255	255	290
Control	mCTRL0557	GTGTATGACGAGAAGCGAAG	1095	659	991	547	551
Control	mCTRL0558	GGTGTGGACCGCTTTTACGC	8063	433	413	472	671
Control	mCTRL0559	GTTATACCACCTACTATGAC	4305	935	912	844	1105
Control	mCTRL0560	GATACGTGAGGTTGCCGGTG	1719	827	975	658	1307
Control	mCTRL0561	TATGCCATATGCCCGTTTTT	7882	1067	902	1080	1682
Control	mCTRL0562	TCATCTACGGTATCGAAAGG	2766	1127	920	836	902
Control	mCTRL0563	AGTGTCACGGCAAAGTCGAG	1957	685	1034	433	397
Control	mCTRL0564	CAATGGCGTCTGCCGTTCAG	3192	446	339	461	532
Control	mCTRL0565	GCTCGCTGATGTGTAATCCG	3518	964	1131	882	1168
Control	mCTRL0566	GGATACATCGGCGCGCTAGT	2436	902	1000	699	594
Control	mCTRL0567	CAGCACCACGCGTCGTGCGG	3683	571	435	604	609
Control	mCTRL0568	CGATGTCGAAAGTCGGTCAA	3153	704	1309	816	1673
Control	mCTRL0569	CGATACGCTATAGAATAGTC	1899	577	656	561	935
Control	mCTRL0570	GCGTGGAGTTCGTCGCTCTT	3518	1155	1306	1066	1790
Control	mCTRL0571	CACAACGCCTACCAGCGGAC	3176	321	245	310	434
Control	mCTRL0572	ATTTGCCCGTCCATACGCGG	6672	331	304	248	339
Control	mCTRL0573	CGGTAAGATGGTTATACCGT	3111	326	669	217	205
Control	mCTRL0574	GTTCGCGGGGGCTTCTATCA	2825	1491	2719	1308	2051
Control	mCTRL0575	GGCACCGCGTTTATTGCACT	5897	1488	1892	1006	1711
Control	mCTRL0576	TGACAACCGCGGTACCTCTA	3443	359	257	409	873
Control	mCTRL0577	GGTCGCTCGATTTCATTTAA	1497	360	391	293	328
Control	mCTRL0578	GACGAAAGGTCCTACGAAGT	1276	667	790	489	794
Control	mCTRL0579	GTACCACTTATCGACCTTGC	5220	580	302	485	416
Control	mCTRL0580	TTCAAGTGTTATGGACGCGC	3316	1356	1607	980	1484
Control	mCTRL0581	TGAGAGCAAGGCGCATACGC	2930	585	724	550	1315
Control	mCTRL0582	CATTCTCTGACGAATGCGCC	1244	908	586	807	955
Control	mCTRL0583	ATCCCCCCGACTTAGGGATT	2702	1983	5346	1472	2274
Control	mCTRL0584	CAGTGCCGGTAGCGGCACGG	2030	378	551	344	221
Control	mCTRL0585	ACGACGTCCGCTGTGTGTAT	7396	217	327	148	175
Control	mCTRL0586	GCGCTCGAACAAACATGGTC	1519	272	306	186	418
Control	mCTRL0587	GGCAACGCACGCTGGGTTGT	3291	683	811	601	672
Control	mCTRL0588	GCTATTCCGCTCGTCAATTT	3365	292	215	280	299
Control	mCTRL0589	TTCATCGCAGATCGATTTCG	3941	1302	1388	1053	1376
Control	mCTRL0590	TTCATCCTTCGTAGCGCAGC	3472	677	645	487	1719
Control	mCTRL0591	TGGTTCACCACTCGAGATCG	4182	1603	1751	1557	2473
Control	mCTRL0592	TTGAGCGGACCCCCCTACAA	2238	1330	1503	1952	9846
Control	mCTRL0593	ATGTGTATGAAGCCCGTCAT	4387	953	955	747	1578
Control	mCTRL0594	TAGGTGGCGCCCAATCGGAC	3166	192	151	178	125
Control	mCTRL0595	CTCGTGTCACTCCTCGGTTC	13131	156	190	199	114
Control	mCTRL0596	ATGCCAATGCCGTTGTTAGC	4061	577	554	493	430
Control	mCTRL0597	CCTTACGGCGGAGAACGAGT	87	947	1011	836	1975
Control	mCTRL0598	CGCGCGGATCTTCCGTACAA	2700	1762	1420	1301	2343
Control	mCTRL0599	CGGCAAGCGCATTCCTATGG	3707	674	571	628	879
Control	mCTRL0600	TATGATCGTATGGCCCTTCC	7501	260	417	254	457
Control	mCTRL0601	ATCGCCTAGCCCAAGCGACG	2249	939	789	969	1492
Control	mCTRL0602	GCGATCGCCGGTATAGCTTT	359	752	847	755	888
Control	mCTRL0603	CCGTTCAATTATGCTGGCGT	3132	1	0	0	1
Control	mCTRL0604	CCAGCTAACGTTTTAGTACG	4583	700	672	666	824
Control	mCTRL0605	TCCCCTTCGTCGGCGCCAGG	6935	403	393	319	755
Control	mCTRL0606	TTCTGATTAGATACGTACGA	3469	1313	1370	1039	1591
Control	mCTRL0607	TTTTCGTCGACTAAGTCAAG	2697	1124	1696	779	1252
Control	mCTRL0608	TCAATTAGTGGCCGCCAAGC	5888	195	184	218	357
Control	mCTRL0609	TCAGCTACGATCGGACCCAA	2892	1319	1239	1020	1007
Control	mCTRL0610	GCACGAACCCGTTCGTATGG	2836	303	455	276	356
Control	mCTRL0611	CAATATGCACGTAGCCTCGT	4431	897	889	873	1648
Control	mCTRL0612	GACCGACGGTATACCCTACT	4180	488	418	474	334
Control	mCTRL0613	TTGAAGTAGGGTCGGATTGA	3016	308	639	384	326
Control	mCTRL0614	AAGGCGTAAACGAGTACACG	1663	320	484	286	269
Control	mCTRL0615	AATGAGCTTCGAGTTCGTCT	2108	1155	1102	1068	1181
Control	mCTRL0616	ACGTGTTCTCGTACTTAGCT	2609	598	606	756	1252
Control	mCTRL0617	TTAGCCTTGCCCCGTCATAC	8592	256	336	190	519
Control	mCTRL0618	GCCTTTTCCGCCCGTTCAAG	3351	2141	2312	1730	2545
Control	mCTRL0619	CAGAAACTCTTACCGAGCGC	2504	558	531	473	598
Control	mCTRL0620	CTTGAAAAAGGGGCGACTAT	1725	283	213	297	412
Control	mCTRL0621	CCTACTAACGACGAGTCAAA	2097	758	862	521	633
Control	mCTRL0622	CATTTCCGGGGTCCGATGCA	5589	411	206	384	580
Control	mCTRL0623	CCGGGCGCCGTATCCCCTAC	5050	850	601	642	867
Control	mCTRL0624	GAGACCCATTATGATCCTAG	1462	2018	2272	1632	3112
Control	mCTRL0625	CGAACTTCTACCGTTGTGCG	3256	371	372	350	474
Control	mCTRL0626	TGGCTTAATGGACAGCGCGA	2206	1077	772	854	882
Control	mCTRL0627	CCGGCGCTGCGGTCGGCTTG	3006	2012	2021	1627	2147
Control	mCTRL0628	GTTACTTACCTGACCGGCAA	2647	646	486	597	563
Control	mCTRL0629	CGTTATTGTACACCACGCTC	4630	652	687	661	484
Control	mCTRL0630	CGAGCTCGGCAAATTTGATT	3048	154	206	110	100
Control	mCTRL0631	TGGTACCACTCGCCGAATCT	5624	722	1206	439	587
Control	mCTRL0632	CGTGTTTTACCTCGCTTCGA	5162	481	475	479	462
Control	mCTRL0633	CGTCCTCGCAGCGTAGACTG	4489	247	216	176	131
Control	mCTRL0634	GTACGCAGGGTGTAGCGACC	2507	1196	1153	1097	1689
Control	mCTRL0635	CCTTTGATGGGCGCGTACTC	3739	591	589	428	626
Control	mCTRL0636	CCCTCGGTTGAGCAGCGCGA	4499	281	255	305	288
Control	mCTRL0637	AAGCGTGAGATTCACCGCCG	1758	941	1157	630	1378
Control	mCTRL0638	GCGGGACCCCCGGTATAGTC	1026	759	676	742	1371
Control	mCTRL0639	GACAGCCGGTTGACCGGGTC	1981	1045	922	954	5012
Control	mCTRL0640	GGAAACTCTTGCTCGACACG	1379	112	143	122	157
Control	mCTRL0641	TTGAACACGACACCCGTGCC	5631	1686	2249	1445	2117
Control	mCTRL0642	GTCGCTCGAACTCACGTAGC	3721	349	313	366	416
Control	mCTRL0643	GGGCGCGTCATAGACACACG	1605	124	161	118	235
Control	mCTRL0644	CGTCGAAGATACGCAGGCTG	2539	1149	1586	1087	2043
Control	mCTRL0645	TAATGGCACTTACCGGGTCT	3958	217	173	291	918
Control	mCTRL0646	CTAACAGCGCCGTTATCTAC	4495	1107	1183	875	1485
Control	mCTRL0647	TTAGTTCGACCACTCCTGAT	4816	510	405	558	478
Control	mCTRL0648	AATGCTGCGTACGATAACCG	3292	304	360	197	195
Control	mCTRL0649	TATGACACACAATCTGCGAC	2840	1024	841	1043	1583
Control	mCTRL0650	TTGGCGGCTCGCTCCTGCGT	9938	397	681	354	374
Control	mCTRL0651	AGTCAGCTCCGGGGTATACG	2413	923	1312	671	1111
Control	mCTRL0652	GCGAGTTATTTCGCTATAGG	2186	505	1242	318	408
Control	mCTRL0653	ACGTTGCAGCTCGCGTTTCG	4143	330	292	259	322
Control	mCTRL0654	CATCGGTAGTCACTACGCCC	6077	738	713	790	930
Control	mCTRL0655	GACCACTATGTACTTATCGC	4792	413	285	323	825
Control	mCTRL0656	ACCGCGCATCATTGACGGTG	3400	1404	1119	963	1161
Control	mCTRL0657	CAAACGAGGCCACGTACGTG	2339	498	509	465	992
Control	mCTRL0658	TCACTCAAAGTGCGTAGTCG	4152	505	313	415	316
Control	mCTRL0659	GTGTCTTTCGGTCTTACGAG	2901	559	895	578	551
Control	mCTRL0660	CCGTGATTTCGGTAGCGTAC	3745	1246	1352	1081	1573
Control	mCTRL0661	CTTTGGCGTCGAGAAGCGCA	2802	1406	1894	1111	1476
Control	mCTRL0662	AGATAGCGCAATCCCGCATG	2564	1032	975	899	1105
Control	mCTRL0663	CATCAGCCCATTATGACTCG	3832	633	795	847	1228
Control	mCTRL0664	CCGGAGCGCGTTGCAGTTCT	4319	800	901	744	1079
Control	mCTRL0665	TTTTAGTAGGTCAACGCTGT	3036	2055	1893	1888	2511
Control	mCTRL0666	CTAATTCCAATATCCGTCTG	5753	68	54	64	103
Control	mCTRL0667	AGTTAAGCGCGTATCTACGT	2991	722	793	546	892
Control	mCTRL0668	AGTCCGGTCGAAATCTGTAT	3792	198	160	172	148
Control	mCTRL0669	ACGCACCCATACAGGCGCTT	2848	478	492	560	737
Control	mCTRL0670	AGGCCCCGAGACGCGCCACA	3365	1351	1449	1054	1219
Control	mCTRL0671	TGACCCGTCTCTTCGCGCAC	7301	2015	2268	1703	3335
Control	mCTRL0672	TCCTCCGATCGACCAGGGTA	4513	689	1009	470	833
Control	mCTRL0673	CGTTAATCCACCGTATGGGC	3054	1136	1667	661	1090
Control	mCTRL0674	ATTAGGTGACTGGAACACGT	2762	1251	1944	831	1364
Control	mCTRL0675	TCTTCTCGAGCGTGCGGGCC	6782	161	228	299	395
Control	mCTRL0676	CGTGTGTTTACAGCCCTTAC	5581	518	429	312	469
Control	mCTRL0677	CTACCGGTCACGTTGTGACC	2814	292	122	284	114
Control	mCTRL0678	TGCTGGCCGATACGTGCTTG	9472	512	546	380	782
Control	mCTRL0679	ATACCTCCGCTACACCGTCT	8916	417	458	304	320
Control	mCTRL0680	CTCGTCGGCTTTCGTGCTGC	10225	497	421	491	374
Control	mCTRL0681	GTAGGCCGCTGATCGAATAA	2029	352	321	278	537
Control	mCTRL0682	TTTCTAGGGCCGCCGCCCGC	10033	774	804	625	720
Control	mCTRL0683	CACGGCAGGCATCTCGTCTA	4396	429	426	433	541
Control	mCTRL0684	GAGCGCCAAGCGTGCGTTGA	3031	728	569	978	1451
Control	mCTRL0685	CTCGATGCCACGGAAGGCGG	1811	1447	1924	1192	1413
Control	mCTRL0686	CACGCCTTCGTCAACCCTAT	4702	1056	960	1037	1035
Control	mCTRL0687	GCCCGTTGTGAGCGGCATGC	6190	1229	1546	1016	1455
Control	mCTRL0688	GAGCGCGGGCCAGCGAACGT	1785	2423	2688	2247	2771
Control	mCTRL0689	TCGGATCGGTACATAAAGTT	2919	214	171	245	305
Control	mCTRL0690	TGTCTGCCGCATACGCTATA	7164	565	543	414	451
Control	mCTRL0691	TCACCCGCGTATACGACCTG	6605	405	603	278	346
Control	mCTRL0692	TGTGCCTACGCCATTCGGCT	6605	1913	2396	1631	2039
Control	mCTRL0693	ACCATCCGATATTACGAGCA	2469	25	8	27	60
Control	mCTRL0694	GCTTCGGAGGCTACGTAGTA	1760	419	401	373	407
Control	mCTRL0695	TGAGCCGGTGCGCTCTCGGT	881	206	160	140	215
Control	mCTRL0696	TTTACGTATGCTGTGCGCGA	6088	285	368	268	637
Control	mCTRL0697	TAACTCTAATGCGTTCCAAG	2037	1142	1084	1002	946
Control	mCTRL0698	TATGAACCTCCGGATCGGTG	2429	1666	1978	1549	2960
Control	mCTRL0699	CGTTAATAAACGCGGTTTCA	252	466	499	334	508
Control	mCTRL0700	CGCCCCTAGTTGTCCCGCCC	11016	2816	3175	2311	3164
Control	mCTRL0701	TTGTTTCAGCCTTGAGCGCG	4232	1114	1132	1053	1333
Control	mCTRL0702	CTCTCTGCGAGTCGATGATT	4552	363	265	268	232
Control	mCTRL0703	CGAGTATCAGCATGTCGACG	3064	289	241	243	413
Control	mCTRL0704	AGTGCCGGGGGTGTATACCG	2551	784	832	839	1735
Control	mCTRL0705	CGGTACCACGCCCCACCTCG	6227	477	343	494	483
Control	mCTRL0706	GTACTGACGTTACGTTCATA	5670	623	603	355	255
Control	mCTRL0707	ACGCAAGCGGAACGCGTCTA	1633	263	389	282	512
Control	mCTRL0708	GAGCGTCCCGTGATTTAAAG	1806	185	164	243	210
Control	mCTRL0709	GGTAAAAAGCGTAACGAGTA	974	696	801	735	1147
Control	mCTRL0710	CGTGAATCGACCCTCAATAA	2728	1059	1609	944	1366
Control	mCTRL0711	AGAGGCGGAGCAATACTCGC	2189	777	806	635	999
Control	mCTRL0712	TAGAGCAGATCCCCTCAACG	2429	939	1066	724	944
Cramp1l	KY018395	CCGATACCTGAAGTCGTGCC	5163	1565	1138	1318	1474
Cramp1l	KY018396	AGAGGGTGGCCGGTGCAAAC	1354	293	190	360	351
Cramp1l	KY018397	TCTGTACTCGTGCCCAAGCG	4709	980	814	1298	2437
Cramp1l	KY018398	CCCTTTATAACGTACTGTGG	4172	373	445	260	853
Cramp1l	KY018399	AGCACAGGGTGCGTCCTTCC	2127	956	436	1087	888
Cramp1l	MGLibA_11814	GGCGAGCTACGCAAGAAGAT	916	284	268	211	208
Cramp1l	MGLibA_11815	AGGTGCGGTAGTAAAAATGC	1275	355	340	422	761
Cramp1l	MGLibA_11816	CTCATACAGTCCCTCGAAGA	1957	185	85	205	268
Cramp1l	MGLibB_11813	CGCTCCTCCTCCCGGAACAT	5554	1464	801	1445	1696
Cramp1l	MGLibB_11814	AAGTCATCCCAGGAACTCTA	1424	1476	1949	948	1266
Cramp1l	MGLibB_11815	TTGTTCTTCACCATGCTTGC	5740	364	154	279	564
Crebbp	KY018465	TGGATATTGCTGTGGACGAA	1864	1037	941	660	1119
Crebbp	KY018466	AAGTGCCTGGCGTAGCTCCT	3000	359	445	308	372
Crebbp	KY018467	ACCTACTTTTTTTGCGTGGC	3906	1082	767	709	576
Crebbp	KY018468	TTTGCCAGTGAATCGCATGC	3892	1405	1313	1122	1551
Crebbp	KY018469	GCACTGGTGTTCGAAAAGGC	1461	218	217	505	1019
Crebbp	MGLibA_11859	TAACTGGGGGTTCACTCCAG	2818	573	342	568	644
Crebbp	MGLibA_11860	GGACAACCCTTTAGTCAAAC	1060	531	348	691	572
Crebbp	MGLibA_11861	TTGTTGGTTTCGCTTGTCAC	6339	315	182	429	273
Crebbp	MGLibB_11858	CCATTGGGGATCAGCTCATC	3563	204	92	203	214
Crebbp	MGLibB_11859	CACGACAAATCATCTCTCAT	3913	343	154	312	147
Crebbp	MGLibB_11860	CCTGATGAGCTGATCCCCAA	2829	180	160	140	190
Csf2	KY018783	GACCCTGCTCGAATATCTTC	2326	666	907	476	660
Csf2	KY018784	ATATTCGAGCAGGGTCTACG	2217	592	1015	628	994
Csf2	KY018785	CGCCTGAAGATATTCGAGCA	2103	404	314	330	454
Csf2	KY018786	AGAGAAGCAGCTTACCTTGA	1820	378	383	451	562
Csf2	MGLibA_12087	CCGCCTGAAGATATTCGAGC	1576	733	815	753	828
[truncated: 5,781 more rows]

## Sheet: In vivo
Gene ID	Symbol	OligoSeq	Library	Input cell pools	B6 Rag1-/- mice												B6 WT mice
					1	2	3	4	5	6	7	8	9	10	11	12	1	2	3	4	5	6	7	8	9	10	11	12
2410016O06Rik	KY001700	CCGAAGGCACCGGAAAAGTG	1709	157	0	0	0	0	0	0	0	0	0	0	0	0	0	0	3	19	0	0	0	0	0	1	0	0
2410016O06Rik	KY001701	AAGCCTTCTCGCCCACCGTG	5334	924	123	390	365	258	130	224	32070	27	144	77	692	480	47	28	1785	656	48	14	453	48	552	1262	933	1336
2410016O06Rik	KY001702	GGGCGCGCTGACACCGGCCG	2299	1363	160	1145	77	130	3066	25	42	75	1776	7801	52	36	9	8	21	212	111	5	6	74	2449	781	14	1913
2410016O06Rik	KY001703	GGCGAAGCCCGGGGTCGCCC	24	8	0	0	0	0	0	0	0	0	0	0	0	0	0	0	0	0	0	0	0	0	0	0	0	0
2410016O06Rik	MGLibA_00864	GACGCCGCGCGCTACGTCGA	4499	1001	58	25	269	290	557	41	337	173	885	142	60	444	149	4	35	202	372	7	14	24	25	516	18	16
2410016O06Rik	MGLibA_00865	TCTGGCGCGTCTACCGACCG	4875	985	14	80	148	266	67	469	159	49	19	5	36	35	1	4	37	0	6	757	25	6	31	7	4	130
2410016O06Rik	MGLibA_00866	CCGTCCATCGACGTAGCGCG	3462	958	38	236	52	115	41	43	223	69	13	39	222	164	835	8	108	9	63	35	15	1541	72	9	26	47
2410016O06Rik	MGLibB_00864	GCAGGACCGCAGCTACTACG	2564	612	3	8	906	34	3	4	35	0	4	0	612	0	0	2	6	1	1	1	1	3	0	1	17	1
2410016O06Rik	MGLibB_00865	CGCTACGAGGACGTGCAATT	3525	794	41	9	7	1846	439	8	3	541	15	115	753	1096	13	18	9	67	8	87	1041	109	3	21	7	33
2410016O06Rik	MGLibB_00866	GCTCGCACGCGGATGAGCCG	693	326	174	83	109	24	67	606	92	41	183	159	14	60	56	24	238	3	581	18	195	24	226	250	17	110
2610002M06Rik	KY001812	GTTCAAACTGCAGTAACAAT	2274	745	11261	885	415	423	78	89	290	30	174	2569	241	421	36	792	349	186	19	139	9	296	309	132	487	128
2610002M06Rik	KY001813	TTTCTTGAGAATGAGTGCTA	1672	345	54	9	19	26	12	58	3	16	118	687	349	9	55	0	27	6	3	2	36	5	2	4	12	5716
2610002M06Rik	MGLibA_00909	AGATTTAACTACACCTGCCA	2213	578	1450	1114	53	505	1079	809	105	296	738	45	452	627	8505	433	1475	965	4194	12064	273	124	14406	538	25152	359
2610002M06Rik	MGLibA_00910	CTCTTACCTGTGGTGTCGTA	4432	1024	4	31	2	4	473	247	5	9266	15	6	1	61	4	0	1	6	2	603	1	4	1	0	1	7
2610002M06Rik	MGLibA_00911	TACTACCCTTACGACACCAC	7413	2168	70	390	318	377	2072	210	2388	181	166	126	785	220	77	190	90	48	11	76	16	39	527	41	81	85
2610002M06Rik	MGLibB_00909	AATCTATGGATGCTACATTG	3408	1222	79	17	10	51	39	4	22	10	391	32	21	76	1	0	7	0	56	4	0	9	24	4	19	8
2610002M06Rik	MGLibB_00910	AGTTCAAACTGCAGTAACAA	1178	185	201	17	7	6	0	1	20	0	1	223	39	6	4	20	14	55	1	9	0	14	8	3	9	2
2610002M06Rik	MGLibB_00911	TTGCTGCAAAAGAACTTAAT	1535	666	19	281	392	37	2478	5	3	409	9	106	32	21	0	3	9	7	473	12	6	35	188	0	0	1
4632428N05Rik	KY002218	GTACCTCAGCTCACGAGGCG	2882	609	23	31	812	99	248	157	492	5	103	1275	572	10	305	41	0	11	7	73	12	7	114	83	1330	30
4632428N05Rik	KY002219	ATGTGAAGTTGCGTATGGGC	2853	593	6	0	27	0	222	247	160	60	48	28	1	366	162	1	3	0	1	1	211	26	207	183	0	6
4632428N05Rik	KY002220	TGCAATGTGAAGTTGCGTAT	3670	1637	189	361	2066	1878	1382	1458	214	73	59	170	91	209	4	16	291	7	14	26	281	11	11	10	18	25
4632428N05Rik	KY002221	CTGCAATGTGAAGTTGCGTA	2723	729	17	70	612	38	39	327	7	8257	19	30	10	8	7	36	13	0	1	10	14	13	1	1	5	2
4632428N05Rik	KY002222	CCTTGGGGTCACATTGCGCA	4287	1792	66	359	29	30	269	4	28	18	103	19	17	40	0	12	12	603	1	1	3	33	54	8	4	12
4632428N05Rik	MGLibA_01107	ACGGTACTTACGGCGGTGAG	1743	549	18	5	2	56	2	28	23	66	57	23	15	27	7	1	5	6	3	3	1	0	6	0	0	6
4632428N05Rik	MGLibA_01108	CTACGGGTCCATGGAGCTAC	4018	1816	984	1636	5628	3434	183	7220	1389	274	2005	456	16667	1134	59	379	2868	100	781	206	644	2705	1881	1438	5730	327
4632428N05Rik	MGLibA_01109	ATGTGACCATCTACAAGACG	1728	515	7	183	11	2160	63	4	34	51	257	21	119	9	0	0	6	1	1377	11	0	1	15	1742	3	10
4632428N05Rik	MGLibB_01107	CCTTACAGGCATCACGGCTG	3152	1126	51	1585	6	15	57	10	31	283	21	2408	80	131	11	8	21	90	12	76	23	92	21	13	62	7936
4632428N05Rik	MGLibB_01108	CGGCGACATGGGTGTCCCCG	3263	961	212	258	117	882	51	49	210	68	114	510	70	98	43	53	274	21	1561	13	162	73	402	297	23	99
4632428N05Rik	MGLibB_01109	CTCATTAGACGCCATGCATG	4807	1404	34	36	618	146	21	141	17	66	1955	17	26	36	24	31	1	0	4	53	16	974	6523	62	5	80
Aanat	KY004017	GCGTTTGAGATTGAGCGGGA	1350	175	0	0	0	0	10	0	3	0	0	0	3	5	0	0	0	0	0	3	5	0	0	0	0	0
Aanat	KY004021	CTTCATCATTGGCTCGCTGT	3919	675	248	39	91	248	31	13	189	445	32	26	10	11	115	447	33	30	2	46	5	204	22	12	3	8
Aanat	MGLibA_02217	GATGCCACGCCTTCCTGCGC	6362	2232	1377	1293	128	228	623	226	143	236	254	2573	197	148	53	29	68	41	44	25	47	20	142	123	154	732
Aanat	MGLibA_02218	CCGCTCAATCTCAAACGCAC	1930	418	0	2	0	9	70	5	25	7	10	11	0	14	2	1	0	0	0	2	0	398	2	2	1	9
Aanat	MGLibA_02219	TGTGCACCGCCAGTACGTGC	8232	2335	430	306	536	321	187	336	211	54	107	546	514	494	13	7	40	66	36	368	62	17	234	60	13	227
Aanat	MGLibB_02217	CCAGTGCGTTTGAGATTGAG	4164	1277	57	359	515	2669	166	65	423	49	207	49	259	91	140	19	624	62	22	58	8	353	100	10	8	19
Aanat	MGLibB_02218	CCCTCTACTTGGATGAGATC	2144	726	9	1	2	29	21	3	4	14	8	9	0	1	0	0	1	2	3	1	0	8	2	3	3	248
Aanat	MGLibB_02219	CCTTCATCATTGGCTCGCTG	4954	1253	466	501	555	172	883	256	230	40	304	1101	418	27	21	17	98	478	14	7097	36	115	23	5	62	171
Ado	KY005608	ATGCCCGGGTGGTCGTGCAG	3777	827	181	41	10	31	104	4	151	26	16	61	575	342	63	126	12	6	92	2	64	203	24	10	210	97
Ado	KY005609	ATGTGCATGTAGGTGACCGG	3289	639	25	21	44	539	49	775	32	54	88	15	866	21	5	3	18	24	3	32	5	48	10	341	0	17
Ado	KY005610	GGTGACCGGCGGGAGGTTGC	2838	769	2	44	257	3	34	66	6	6	63	122	27	71	194	14	14	6	1	22	87	115	17	5	0	11
Ado	KY005611	GGCTGCGGCAGCGCCTTGCG	3585	1612	1025	819	754	38	110	66	520	581	747	1431	3762	2561	1339	21	60	414	1017	17	155	24	337	66	63	17
Ado	MGLibA_03243	CCTCAACATCGCGCCGCGCA	5369	2733	276	823	5429	32291	1935	981	1408	2230	1504	3295	9641	7794	1965	8029	1195	784	1333	6232	228	1769	3198	4778	411	478
Ado	MGLibA_03244	AAGCATGCCCCGCGACAACA	2770	642	3	35	1	16	1	937	4	6	13	0	9	21	0	5	25	0	4	1	180	14	8	85	1	2
Ado	MGLibA_03245	ACGCCTGGCGAGCGATGCGC	5786	1740	3955	4053	2104	19325	5506	2927	2359	584	21424	162	485	594	10014	536	273	1667	1005	1189	710	221	488	72	418	16053
Ado	MGLibB_03243	CCTTGCGCGGCGCGATGTTG	4166	2094	9240	21101	113	368	214	795	227	58	209	16529	354	98	487	223	10321	588	48723	14737	349	11498	171	1206	89633	217
Ado	MGLibB_03244	GCCCGTCGAGCTGCCGCGGA	5327	1678	15	5	10	795	83	70	27	9	196	18	11	17	12	2	2	1	0	3	1	846	120	674	281	99
Ado	MGLibB_03245	ACGCAGCACGCCCGGTCGCA	5461	1594	406	973	889	872	1806	419	1037	53	29	899	561	451	117	6	82	5045	35	60	53	144	14	280	16	9
Adora1	KY005613	GGGCTCCCCAACACTGCCGT	3636	1377	23	53	29	95	149	363	92	82	24	100	14	87	56	14	84	13	8	0	149	75	15	6	14	44
Adora1	KY005614	GACAGTGGTGACTCAGCGGC	1903	629	8	14	7	63	14	200	180	39	16	101	187	47	121	2	9	1381	5	30	0	4	13	11	5	10
Adora1	KY005615	TGCTATGAACTCACCGGAGA	1594	442	34	18	3	273	3	2011	84	18	10	10	19	8	11	2	144	30	86	10	0	129	3	26	205	7
Adora1	KY005616	ATCCCTGGCGGTAGCTGATG	4598	1301	49	117	1976	531	64	508	139	59	77	33	3638	223	67	6	114	574	4	15	5	16	9	3	16	5
Adora1	KY005617	CTGCTTCATCGTATCCCTGG	6115	2233	229	367	308	88	324	196	25	102	40	130	1011	50	5	12	138	12	19	122	175	12	77	59	12	142
Adora1	MGLibA_03231	GCTCAAGATCGCCAAGTCGC	3100	782	43	615	9057	113	218	41	96	28	3	27	8	1	18	0	3	3	5	3	0	8	12	5	4	0
Adora1	MGLibA_03232	AACACTGCCGTTGGCTATCC	5060	2252	86	727	796	507	228	431	250	27	903	410	1788	887	149	97	16	50	81	1250	1450	54	1082	109	2021	538
Adora1	MGLibA_03233	CACCATGCCGCCGTACATCT	7643	1906	109	1911	239	2345	258	233	351	233	228	4695	41	119	199	50	36	567	51	7269	136	506	89	603	19	155
Adora1	MGLibB_03231	CTTCTGCTTCATCGTATCCC	8695	3251	398	553	1256	3047	618	1625	8059	851	1124	517	3529	2476	268	608	9644	343	59	675	899	289	4650	81	153	297
Adora1	MGLibB_03232	TGATGTGGCTGTTGGCGCCC	7244	2713	7139	226	5408	281	75	116	163	11	1283	111	624	236	131	35	3447	1254	41	88	51	8183	30	9	5386	447
Adora1	MGLibB_03233	AGGTAGCATCGCGAAGTGCC	2518	1161	61	665	27	276	10	87	64	39	23	20	120	175	20	6	47	948	85	23	9108	90	82	4664	257	48
Adora2a	KY005618	GAACGTCACCAACTTCTTCG	3323	808	697	54	25	328	125	296	497	20	238	28	840	19	6	0	11	271	10	8	1	172	183	29	6	1
Adora2a	KY005619	CTTCGTGGTATCTCTGGCGG	3170	1087	28	289	279	273	572	75	150	98	1374	203	1353	414	29	3661	42	740	18	4786	974	370	99	31	7	100
Adora2a	KY005620	TGGCTTGGTGACGGGTATGA	3126	1242	100	259	2439	470	485	50	2342	724	546	94	249	1112	58	759	95	2	7	157	127	126	110	30	31	45
Adora2a	KY005621	GGGCATCATTGCGATTTGCT	2873	725	43	61	124	23	124	28	54	57	10	11	92	5	8	565	0	2	3369	1	4	31	778	9	1	122
Adora2a	KY005622	CTCCACAAAGACCTGCGGCG	1856	325	84	14	159	4	24	86	43	4	83	62	29	181	0	2	2	2	1	1	80	1	101	1	6	19
Adora2a	MGLibA_03234	TCTGGCGGCGGCTGACATCG	5033	1510	72	193	371	772	901	182	371	132	279	245	393	167	3437	43	139	596	58	152	37	55	274	414	59	54
Adora2a	MGLibA_03235	TCGCCATCCGAATTCCACTC	6284	2430	272	1512	172	278	1276	4454	110	2451	1579	464	225	925	251	76	254	492	39	35	576	136	1803	163	123	324
Adora2a	MGLibA_03236	AGCGAGTCCGCTCCCCTGGT	2764	1110	43	140	160	1092	266	8194	53	87	965	578	555	82	1587	80	336	2349	551	48	107	32	493	48	53	7
Adora2a	MGLibB_03234	CGTGGTACCCATGAATTACA	2961	1098	117	185	196	80	86	22	196	16	11	7	16	100	17	9	2	25	6	12	203	5	150	1	16	52
Adora2a	MGLibB_03235	AGCACACAAGCACGTTACCC	3411	1024	22	88	285	104	11	33	57	26	8	247	23	148	4	0	12	107	6	5	41	24	8	7	5	7
Adora2a	MGLibB_03236	TGTCGATGGCAATAGCCAAG	2328	1281	5	24	756	19	40	2	10	6	4	12	24	10	5	25	8	7	1	2	117	3	7	31	7	16
Adora2b	KY005623	CTTTCTGGTATCCCTGGCGA	3481	758	68	501	5730	77	4736	612	193	43	34	64	360	2312	163	1974	28360	241	62	73	101	208	35	39	3	1349
Adora2b	KY005624	GCGACGGCAGACGTGGCCGT	2097	725	28	219	154	122	301	7	90	73	109	41	255	90	6	12	1940	204	1363	13	8	1198	39	35	21	11
Adora2b	KY005626	GCACCAGCACGAAGCAGGCG	1966	684	362	180	5424	273	1535	304	4178	47	115	54	81	113	23	1636	101	404	29	185	14	1279	331	99	232	1292
Adora2b	MGLibA_03237	GACGCAAGACGCGCTGTACG	2568	571	0	45	14	106	2362	102	126	8	1373	167	25	24	30	6	0	0	38	10	3160	87	14	6	504	22
Adora2b	MGLibA_03238	GGTGGCTGTCGACCGATATC	2889	1713	327	80	29	51	115	144	68	13	101	120	22	61	375	6	10	3	17	17	8	14	23	16	2	11
Adora2b	MGLibA_03239	TCACTGGGACACGAGCGAGA	1572	642	326	10	39	15	12	16	42	28	149	16	66	3	35	5	16	5	2	594	6	3597	5	269	16	156
Adora2b	MGLibB_03237	CATTGGATTGACTCCGTTCC	5024	2645	299	4189	1376	1357	1528	489	213	1141	6312	713	407	1621	424	263	12882	10318	59	253	1565	279	1416	115	1966	90
Adora2b	MGLibB_03238	TCACCTGAGCGGGACGCGAA	1341	329	66	86	51	20	199	88	42	42	5	69	5	5	0	0	5	15	87	36	0	51	0	4	0	7
Adora2b	MGLibB_03239	ATCCCTGGCGACGGCAGACG	3271	943	293	668	18	244	18	15	882	67	446	19	21	150	29	1	6	0	21	5	0	7	4	1	76	4
Adora3	MGLibA_03240	CCCTAATAGCACCAACCGTG	2754	679	28	65	26	104	64	31	9	255	65	2	32	54	1	0	2	7	11	3	4	1	1	3	2	0
Adora3	MGLibA_03241	TTTGTGCCACTTCCGTTCCG	11184	4714	2194	2821	591	1729	2595	5023	684	1266	6446	2165	625	2770	4934	14116	2429	138	1591	1311	24042	953	2787	128	5992	6689
Adora3	MGLibA_03242	ACCAGATGTCGCAATGTGCC	3765	1259	1834	157	88	83	418	37	174	290	1376	41	152	51	29	3	20	37	4	67	26	49	214	51	360	3017
Adora3	MGLibB_03240	CTTACCGGAAAAGAGAGCCA	1205	365	11	31	0	2	3	2	6	2	1	0	20	1	2	0	0	0	0	1	2	18	5	1	0	0
Adora3	MGLibB_03241	CTTGGTGTGGTCCTTGTAGT	3775	1389	63	886	55	345	607	53	5669	118	41	262	210	59	31	200	2772	47	174	154	65	16	5	1007	64	591
Adora3	MGLibB_03242	CTTTGGAAGCCCTACAGCTC	1513	483	0	0	9	2	9	7	22	0	5	2	0	29	0	0	0	5	4	4	0	0	0	0	0	0
Aire	KY006233	CCTAACTCACCGTTTCCAAG	2334	490	22	38	49	25	58	14	3	121	88	17	120	374	11	0	15	49	133	228	13	223	78	16	25	55
Aire	KY006234	TCCCTTTCCGGGACTGGTTT	1652	331	1	58	0	3	5	3	4	5	11	5	15	5	1	31	29	0	1	0	2	0	0	2	0	0
Aire	KY006235	CCTTGCTGGTCCCAAGGCCG	2122	303	7	0	6	0	0	1	16	0	2	28	7	2	0	0	0	1	0	0	1	0	0	0	0	4
Aire	MGLibA_03564	GGATCCCTTCCACGGCCCCT	2180	813	7	195	34	110	3	60	175	636	23	58	1	37	3	17	7	8	0	9	15	2	5	3	97	5
Aire	MGLibA_03565	GCAGGAGACGCTCCGTCTGA	2944	866	53	12	89	10	15	7	8	8	28	29	3	3	0	0	0	1	5	5	15	2	0	8	19	5
Aire	MGLibA_03566	CCGGGACAGTGGGGCCATCC	4465	1476	18	124	32	36	47	43	158	22	23	112	674	69	32	6	9	0	494	11	7	4	6	1	3	12
Aire	MGLibB_03564	TCTTAGGGGGCTTAGTCTTC	3754	623	29	49	17	62	10	4	15	0	12	161	3	13	3	0	7	6	1	5	361	8	4	5	20	6
Aire	MGLibB_03565	GGAAGGGATCCTTATCCAGC	1026	68	0	0	0	0	0	0	0	1	0	0	2	0	0	0	0	0	163	0	0	0	0	0	0	0
Aire	MGLibB_03566	TGGGCTGGAGACGCTCTTTG	4868	1485	514	10163	1022	185	236	287	142	1026	466	333	2242	8560	140	220	781	92	64	556	487	2157	3393	43857	63	496
Akap1	KY006286	AACGCATCCTCGTCCTTAAC	2659	459	15	21	191	299	1	23	919	2	108	18	68	0	28	4551	12	8	7	1	3	1	175	1	288	0
Akap1	KY006287	TCTCTCCAGAGGCCGCATAC	5795	1121	4	70	13	70	117	81	19	55	9	37	139	28	1	0	3	5	5	31	7	15	13	6	5	592
Akap1	KY006288	GGTTAAGGACGAGGATGCGT	1774	283	0	5	7	0	1	3	17	0	2	2	11	0	0	0	3	2	0	0	2	0	0	0	2	1
Akap1	KY006289	CAGAGATGAGATCGCCAAAG	1645	459	58	284	152	93	119	66	343	23	2	18	23	11	1	0	4	5	1	383	2	1	1	276	18	11
Akap1	KY006290	GGCCTTGCCGAGGACTCGCC	2759	657	933	60	6	6	6	806	23	21	8244	11	46	1	5	1	2	7	21	7	0	1	4	7	7	1
Akap1	MGLibA_03615	CAGTGGTGGCGCATAGATAT	3367	1089	202	579	1028	1153	180	65	260	1488	166	2933	158	524	801	6088	5146	323	25	189	164	524	434	92	14	652
Akap1	MGLibA_03616	CACTTAGTTGGTCGACTGAT	3940	671	4	11	5	9	9	2	1	9	3	4	5	12	4	0	4	15	6	2	9	4	5	0	2	5
Akap1	MGLibA_03617	CGATAGCCCCCAGAGTGTCC	3873	626	5	6	7	19	43	3815	12	1	421	11	12	7	5	0	48	4	1	0	0	4	2	3	4	0
Akap1	MGLibB_03615	ACTCTGGGGGCTATCGGGCT	2379	468	16	4	2	1	20	2	3	2	1	3	8	4	0	0	0	0	1	1	3	2	1	0	4	3
Akap1	MGLibB_03616	CTTCCTTGCCGATGACGTCT	6882	2338	940	385	938	1095	668	990	1098	3218	1466	427	1872	563	221	30	319	266	79	183	22	603	153	85	65	174
Akap1	MGLibB_03617	CTTCCATGCACTGCGCAGTC	6749	3172	1438	6533	2312	10718	14751	2638	2406	27147	528	555	460	4821	1076	481	6443	419	379	442	265	784	686	81	2118	1511
Alg10b	KY006634	CAGGCGCAGCGGTACTGCGA	5610	179	0	0	1	0	0	0	0	0	0	0	0	19	0	0	0	0	0	2	0	3	2	0	0	0
Alg10b	KY006635	AGTACCGCTGCGCCTGCGGC	3510	404	7	26	9	30	8	6	486	4	0	2	20	7	66	5	15	9	0	2	2	41	9	0	1	128
Alg10b	KY006636	GGAGAGGCTTGCGCCCACGA	2029	297	0	4	11	9	60	229	36	9	6582	22	22	33	52	7	1	16	67	815	12	2214	1851	4	13	337
Alg10b	KY006637	GAGAGGCTTGCGCCCACGAA	1398	386	4	30	11	57	186	41	158	0	37	28	373	53	5	0	4	2	6	0	29	0	49	4	3	106
Alg10b	KY006638	TCCGAGAGCGGTCCCTTCGT	7862	2007	32	187	27	290	56	88	79	100	444	145	168	72	2	6	17	5	7	59	12	21	52	3	53	14
Alg10b	MGLibA_03819	GTATCTGGTGTCGGTCGGTG	6721	557	12	12	1	11	6	5	9	18	7	11	34	67	13	2	1	1	2	0	0	1	5	83	1	2
Alg10b	MGLibA_03821	CATAGGACCTCGGCCTTGCT	2984	1071	255	909	223	457	92	628	20	77	441	186	278	175	173	15	1144	13	147	10	53	13	113	17	288	268
Alg10b	MGLibB_03819	TACGCTTCCAAACTAAGCTA	1562	170	0	0	0	0	0	0	0	0	0	0	0	0	0	0	0	0	1	1	0	0	0	1	0	0
Alg10b	MGLibB_03821	CTCCCGCAGAGCGCGGCTGA	2026	146	3	3	254	217	153	107	84	24	30	25	57	42	6	17	50	7	3	0	0	1	43	9	17	3
Alg13	KY006649	CTTGTCCTCCAAGTTGGTAG	3401	1007	142	118	195	519	43	93	44	245	58	142	218	167	6	29	408	1667	34	478	12	178	238	152	13	96
Alg13	KY006650	CAGTGCCTCTACCAACTTGG	2740	698	9	69	21	18	40	27	138	30	1982	112	17	23	70	126	12	6	25	11	18	105	390	42	11	246
Alg13	KY006651	TGACTCAGTACGGAATGGTT	2446	698	124	288	831	4964	760	551	794	1159	3005	87	1449	475	160	5	50	28	62	551	29	487	511	56	78	181
Alg13	KY006652	GTGAATGACTCAGTACGGAA	1296	266	7	0	0	0	1	209	4	0	0	3	59	3	0	1	0	0	0	0	1	0	0	0	0	0
Alg13	KY006653	TCTCAGATACTTTACCTGCG	5045	951	17	23	0	16	55	26	3	7	74	7657	15	14	2	8	0	0	23	1	2	0	6	4	13	1
Alg13	MGLibA_03828	GTTTCGACGAGCTCGTCGCA	2816	445	2	0	2	37	2	5	51	0	3	10	4	713	0	0	0	0	3	89	7	0	6	0	0	1
Alg13	MGLibA_03829	GGTCGCTAACGACTGCGTTC	2448	414	16	5	2	45	6	4	4	14	22	0	38	4	14	0	2	0	2	0	335	2	0	0	0	2
Alg13	MGLibA_03830	GGTTGTAACCCAGACTCTCG	1204	307	5	32	8	140	1	0	14	1	3	1	11	17	47	0	1	72	1	8	3	1	6	0	0	8
Alg13	MGLibB_03828	GATCTTGTCATTAGCCACGC	3835	763	19	61	21	12	428	1846	66	24	12	6	169	0	20	1457	4	36	6	4	88	44	36	4	35	5
Alg13	MGLibB_03829	TCCATTGACTGTAACAGCCC	4098	1402	2	41	34	43	22	9	5	5	105	33	9	4	62	2	1	2	5	0	27	4	17	2	0	1
Alg13	MGLibB_03830	GAACAATCATCAATTTGAAT	1004	124	2	0	0	0	0	3	0	0	0	0	5	0	0	0	0	0	0	0	0	0	0	0	0	0
Alkbh1	KY006694	AGTCTCTCTAGTAAACTTCG	1265	390	1203	0	72	6	6	0	9	0	5	2	0	10	0	0	17	12	1	0	0	8	13	3	1	0
Alkbh1	KY006695	TTTACTAGAGAGACTGCGTT	1934	209	0	47	5	12	9	9	2	0	248	24	20179	2	0	0	0	0	29	0	0	0	0	1	13	0
Alkbh1	KY006696	TGGAGGGCCTATGGACTCGA	3270	751	34	44	176	20	125	115	130	125	11	1666	12	38	1	40	0	15	0	33	40	159	0	4	1	6
Alkbh1	KY006697	GAGCGTGATGCCGAGAGGGT	1170	496	3	139	17	11	73	2	28	34	10	126	6	17	22	10	4	2	1	0	3	4	1	0	19	5
Alkbh1	KY006698	CACTGAGCGTGATGCCGAGA	3214	481	2	16	14	6	22	2	15	1	14	16	18	23	3	0	5	3	0	0	6	0	0	0	0	2
Alkbh1	MGLibA_03855	TCACTGAGCGTGATGCCGAG	4196	885	1	7	11	14	16	76	29	7	19	51	264	4	0	0	3	9	8	0	2	29	8	5	8	1
Alkbh1	MGLibA_03856	AGTCTAGGCGATAGTAATTC	1550	318	7	10	13	1	3	3	0	3	2	1	7	2	0	0	2	0	1	0	16	0	0	0	2	0
Alkbh1	MGLibA_03857	CTATCGCCTAGACTCCACAC	2481	1117	70	224	87	132	279	159	274	19	382	52	273	124	1	1	28	292	21	55	477	7	391	5	16	6607
Alkbh1	MGLibB_03855	AGGATAGCCTTCGAGTCCAT	2204	240	0	0	0	0	4	0	0	0	0	0	7	13	0	0	0	0	0	0	2	0	1	2	0	0
Alkbh1	MGLibB_03856	CCTTACTGTCCCAGTTATAA	2397	732	38	276	14	154	136	275	31	112	47	135	20	22	7	8	1101	327	6	16	7	583	397	550	9	115
Alkbh1	MGLibB_03857	GTTTACTAGAGAGACTGCGT	1462	276	2	5	13	1	103	34	8	0	76	1	439	22	1	0	0	0	6	0	17	1	1	0	0	1
Alkbh2	KY006700	CGTGAGGCCAGCATCGCCAT	4699	1097	76	16	92	34	7	12	4100	27	29	71	10	87	1	0	7	7	0	0	2	6	1	14	0	4
Alkbh2	KY006701	GTTCTTCTACGCAGGTGCAC	2809	477	6	105	4	83	2	0	9	5	127	4	4	6	0	5	17	0	0	6	2	0	11	0	0	1
Alkbh2	KY006702	CTGCCTCGGCTTTGCCGAAT	3621	1222	0	21	29	16	4	43	31	13	7	6	116	38	11	0	1	35	9	0	8	10	3	0	19	2
Alkbh2	MGLibA_03858	TGGCGACACCTTCGCGCGGA	2264	634	231	189	215	1703	165	255	248	615	446	529	278	44	986	367	165	18	64	1892	71	1547	77	242	6	719
Alkbh2	MGLibA_03859	CGAAAAGTCAAGTTGACCCG	1331	347	3	0	0	8	1	25	1	0	0	0	0	0	1	0	0	0	1	3	6	2	0	0	0	0
Alkbh2	MGLibA_03860	TGTGATTACACCGTCCTATT	4297	1297	36	2581	360	58	390	145	77	68	72	1407	88	659	13	4	93	112	6	82	9	9	128	4	14	61
Alkbh2	MGLibB_03858	TGTTCGAGATCGAGTCTGCG	3794	961	119	269	45	56	167	8	130	56	33	24	164	1010	0	0	7	29	0	0	2	7	61	2	10	19
Alkbh2	MGLibB_03859	CATCTCTGTGCTCGCCGATG	5381	746	5	50	32	6	9	30	1	6	14	5	6	16	7	0	0	9	316	15	6	2	3	152	3	8
Alkbh2	MGLibB_03860	GACCAGAAAACGTGTACGTG	2125	399	7	16	123	5	0	1	0	1	3	10	2	12	0	0	0	1	0	2	1	1	13	3	5	20
Alkbh3	KY006704	TTGTAACATACGTGAGGATT	2486	517	5	334	2	77	117	242	63	0	10	8	2	16	0	0	1	0	1	1	0	8	1024	3	41	0
Alkbh3	KY006705	GTGATTCTCGAGTAAGTGTA	1702	377	181	44	61	626	16	109	86	13	213	172	3	32	16	5	38	5	102	26	4	13	77	149	74	23
Alkbh3	KY006706	TAGACACACCAGTAGGTGAC	2670	342	1	0	1	2	0	0	0	1	59	16	6	167	2	0	0	0	0	0	0	0	0	3	1	0
Alkbh3	KY006707	CCAGGCTGGCCCCGCGGTCT	4405	1246	88	21	731	96	945	24	22	14	56	16	16	80	0	3	4	87	1	7	272	8	1252	50	4	50
Alkbh3	MGLibA_03861	AGCCGTCTTTCCCAGACCGC	3152	738	2027	4056	32	60	389	1304	92	451	19195	133	363	34	9745	147	312	874	15	43	7	146	55	7387	109	3147
Alkbh3	MGLibA_03862	TTAAGGGTGTGCTTATATCC	3672	401	4	6	11	31	12	3	8	7	87	1	3	13	0	0	9	0	76	5	1	13	36	0	3	0
Alkbh3	MGLibA_03863	GCTTACTTACTCAATCACTC	3019	619	117	40	15	190	674	78	112	5	9	35	158	66	26	33	3682	5272	848	13	140	949	36	8	529	143
Alkbh3	MGLibB_03861	GCCCCGCGGTCTGGGAAAGA	1883	282	0	15	5	45	38	1816	33	8	11	4	26	2	0	0	7	0	0	8	0	0	44	5	3	10
Alkbh3	MGLibB_03862	ACTTACCTAGACACACCAGT	2150	239	1	1	0	15	2	1	1	0	2	6	5	12	2	5	38	1	0	0	0	0	1	2	0	0
Alkbh3	MGLibB_03863	AGCTTTGTAAGGATGTCCCC	2766	553	15	581	1	1	4	11	9	52	65	5	86	4	4	2	0	52	1	1	0	6	0	1	0	0
Angpt2	KY007075	GCACTGAGTCGTCGTAGTCG	4336	1369	42	568	48	143	96	93	1020	47	130	61	60	108	60	5	438	56	54	20	3	27	38	14	86	89
Angpt2	KY007076	ACTGAGTCGTCGTAGTCGAG	1609	358	8	437	95	123	27	3	4	8	1	2	5	1	0	0	5	0	0	0	0	0	0	1	0	2
Angpt2	KY007077	GGAGGAAGATCGGCAGCTGT	1727	381	4	2	0	14	6	81	9	0	61	3	15	6	0	0	0	7	0	17	0	0	3	0	11	0
Angpt2	KY007078	AGCTGTCGGTCTCCGGCAGC	2380	722	6	59	124	34	18	39	91	97	146	14	84	25	42	0	9	137	7	10	517	3	73	28	12	65
Angpt2	MGLibA_04131	ACGGATAGCAACCGAGCTCT	1516	633	0	3	18	2	30	4	33	11	9	18	0	0	0	0	0	16	0	0	59	0	2	0	0	5
Angpt2	MGLibA_04132	GCAGCTCGAGTCTTGTCGTC	4013	1257	15	19	92	482	429	2806	86	42	11	748	87	20	13	2049	1	52	18	7	109	5	295	2	6	6
Angpt2	MGLibA_04133	AAGGAGCGAGTTGTTGACCG	2246	562	182	223	119	47	213	104	32	212	31	14	347	37	0	6	499	6	118	2	5	4	19	46	287	19
Angpt2	MGLibB_04131	AGCTGTTGACGGTCTCCATT	4435	1615	181	666	6746	428	1088	8896	1452	5542	996	4469	545	8957	464	82	508	3337	1409	154	360	988	2499	2303	1324	2516
Angpt2	MGLibB_04132	CTAGCTGGAGAATTACATTC	1580	223	1	4	7	3	0	141	0	1	3	4	24	108	0	0	0	3	0	17	0	2	2	0	0	2
Angpt2	MGLibB_04133	GATTTCCGCACAGTCTCTGA	2863	586	31	92	3	32	24	1	86	0	378	10	4	13	0	4	0	2	0	0	1	5	19	4	2	2
Apc	KY007739	CCCGACTTCCGTAGGAGCGA	2047	7021	24346	62623	63234	53557	78820	22193	67246	24672	124242	37177	90653	66950	44191	83773	83216	27328	55681	54846	72959	19657	58715	46907	30074	17634
Apc	KY007741	CCTACTATCATCATGTCGAT	3693	1173	123	122	515	543	401	1537	2375	315	1427	135	235	1323	23	81	51	371	80	100	449	1245	108	6	384	33
Apc	KY007742	GTACACCTGCTGAATACGAG	1812	405	41	579	108	72	66	157	155	233	212	58	84	68	21	18	37	6	471	173	10	14	759	12	42	24
Apc	MGLibA_04599	GGATCTGTATCCAGCCGTTC	2787	530	50	30	11	292	1170	29	42	54	9	317	36	13	0	14	2	3	7	6	3	60	1	1	3	2
Apc	MGLibA_04600	GACTTACTAGAGCGTCTTAA	1957	767	4545	2978	3381	137	248	297	3014	3131	2870	594	21146	13670	108	13	139	1482	4244	53	123	72	1300	161	417	123
Apc	MGLibA_04601	AGATCCTTCCCGACTTCCGT	5161	2517	1899	287	690	3993	559	369	1416	1168	3062	1510	6397	2095	141	32	361	498	72	713	38	401	1699	971	49	112
Apc	MGLibB_04599	GTGCACGCTTCTCCATGTCC	10878	3107	223	627	248	272	1089	1702	483	553	412	703	967	236	124	42	142	61	69	32	25	56	123	184	117	19
Apc	MGLibB_04601	GAAGATGAGACTATGACTTC	1792	519	3	11	80	44	55	4	115	1	152	21	32	5	2	0	6	1	7	0	42	7	46	1	15	0
Areg	KY008079	GGGAAAGGCGAATCGCTTTC	1408	450	4	83	6	11	11	8	7	29	3	5	28	40	8	0	1	18	7	2	1	10	11	48	1	23
Areg	KY008080	GGAAAGGCGAATCGCTTTCT	1905	759	3	44	19	37	179	8	21	1	20	1	8	134	4	0	5	4	5	0	4	19	8	3	0	6
Areg	KY008082	AGAAGGCATTTCGCTTATGG	2391	513	14	18	13	3	0	1	25	1	715	3	5	76	0	0	4	0	279	0	0	5	6	0	2	0
Areg	MGLibA_04830	GCCAGAAGGCATTTCGCTTA	3278	1515	860	463	377	34	518	29	6632	141	9092	50	1947	49	463	10	20	2	21	3	14	840	6431	19	11	10
Areg	MGLibA_04831	AGGGGACTACGACTACTCAG	1301	728	18	19	444	12	24	6	86	13	150	316	26	157	1	1	1	4	0	52	3	22	16	7	2	23
Areg	MGLibA_04832	TGCCGATGCCAATAGCTGCG	4873	2369	170	3474	1045	885	908	366	962	353	4386	709	348	4341	2247	363	12099	214	94	125	227	470	304	321	81	166
Areg	MGLibB_04830	ATGCAGATACATCGAGAACC	1236	204	4	0	0	1	0	12	1	1	5	4	1	6	0	3	0	0	2	1	1	0	3	5	0	6
Areg	MGLibB_04831	GCCATCATCCTCGCAGCTAT	4172	1442	23	73	83	20	753	78	5	1673	16	13	134	172	34	67	31	5037	11	14	90	19	284	6	511	7
Areg	MGLibB_04832	GCCTTTGGAAACGATACTTC	1615	485	6	17	3	8	9	27	21	1	111	1201	8	0	0	0	1	0	8	9	27	26	3	19	1	5
Arg1	KY008145	GAATAAACTTACTGTTCCCC	2195	522	11	75	0	24	27	5	41	7	4	22	17	0	41	0	1	0	0	84	0	60	0	2	24	20
Arg1	KY008146	GCCAAAGACATCGTGTACAT	2472	1003	41	539	440	124	378	781	1069	204	104	771	2731	359	63	41	51	6	121	138	193	110	22	7	292	23
Arg1	KY008147	TTGGCTTTCCCCACAGACCG	3206	801	16	279	112	151	100	332	76	27	44	182	320	26	7	9	19	2	17	104	69	19	7	5	11	19
Arg1	KY008148	TGTGAAGAACCCACGGTCTG	2616	744	2	0	38	7	169	5	12	18	5	12	16	1	65	3	227	1	3	215	4	7	3	36	1	102
Arg1	KY008149	GAGTATGACGTGAGAGACCA	1270	379	3	226	21	93	912	21	36	131	861	2	20	11	1	19	12	2	8	1	0	2	1	0	4	46
Arg1	MGLibA_04878	CTTGCGAGACGTAGACCCTG	4403	1181	13780	1033	357	634	112	103	466	21	193	2840	101	906	42	900	398	170	8	165	17	320	349	130	550	136
Arg1	MGLibA_04879	AAGCATCTCTGGCCACGCCA	3394	1037	19	20	87	166	99	7	7	157	3	40	28	3	12	17	2	5	31	25	3	14	19	126	27	8
Arg1	MGLibA_04880	GCCAATGTACACGATGTCTT	3383	798	6	26	28	7	8	2616	181	4	75	29	48	20	3	1	22	0	23	7	0	48	2212	2	111	9
Arg1	MGLibB_04878	CTGTTCTTCAGCCTCGAGGA	2479	986	40	376	3040	778	72	74	355	16	30	27	67	328	27	9	6	3	5	1198	5	89	42	2	1	16
Arg1	MGLibB_04879	TGGGTTCTTCACAATTTGAA	1700	760	1	24	1	26	3	60	10	3	435	2	365	13	7	0	0	0	25	0	4	2	12	1	3	0
Arg1	MGLibB_04880	CATCCACCCAAATGACACAT	2781	1300	19	62	76	678	1362	26	749	24	303	114	7117	698	7	29	516	6	11	11	48	26	27	4	136	23
Arg2	KY008150	CCAGCTTCTCGAATGGCAGC	1960	661	6	15	479	55	3	1	16	14	4	8	24	158	4	3	4	0	19	9	37	0	1	1	9	0
Arg2	KY008151	GGTTGTGTATCCTCGTTCAG	2864	890	76	865	281	619	326	90	127	9	3057	103	43	330	2	16	43	0	20	8	116	32	56	15	27	57
Arg2	KY008153	CTGGCAATAGGTACCATTAT	2986	1438	343	587	65	845	21	81	3564	32	89	93	481	413	1517	531	4156	1668	45	21	10	823	119	14	7	231
Arg2	KY008154	GTACCATTATCGGTCACGCC	2567	504	9	9	2	90	6	0	2	45	14	23	5	1	4	0	0	1	3	0	1	2	5	41	0	6
Arg2	MGLibA_04881	GTGCCGGGCGTGACCGATAA	2387	925	266	94	66	1208	916	616	150	453	11	1248	651	516	3550	49	80	145	289	691	377	594	6950	7803	6598	155
Arg2	MGLibA_04882	CCCCCAAATATTGTGTACAT	3337	1395	12	82	103	53	35	37	82	25	176	25	50	13	1	0	2	4	38	18	42	4	21	11	12	10
Arg2	MGLibA_04883	TTCAGTGGGCCTTGCCAACC	4325	1558	672	7458	829	4119	3607	4340	2205	784	1142	779	464	729	70	2549	7036	658	64990	357	1464	335	2335	999	766	8503
Arg2	MGLibB_04881	TTGGCAAGGCCCACTGAACG	1677	727	12	16	65	6	75	4	141	13	50	7	15	13	0	1	10	0	0	6	1	4	3	2	6	5
Arg2	MGLibB_04882	CCAATGTACACAATATTTGG	2747	816	6	101	145	94	38	6	6	23	109	10	53	22	3	28	23	15	5	5	4	88	23	4	1	3
Arg2	MGLibB_04883	CCAGCTGCCATTCGAGAAGC	2217	851	50	50	195	410	20	11	29	0	37	2	21	153	0	3	11	3	0	8	49	9	4	2	52	7
Arid1a	KY008440	GGACAGATGCACTCGGGCGT	2335	1099	157	143	72	34	570	59	108	39	147	430	79	74	45	63	244	16	687	24	173	82	286	269	38	90
Arid1a	KY008441	CAGCAAGGCCCCAGTGCGTA	2505	469	29	190	28	2	11	46	5	60	7	340	0	16	4	4	13	2	4	0	2	2	8	0	2	3
Arid1a	KY008442	TCTCGGGGAGCTCAGCGCGT	4103	1506	18	11	1123	0	15	0	25	7	3	6	6	213	0	1	81	1	0	4	0	22	5	1	1	60
Arid1a	KY008443	TTGCCCGAAGCCGTAGGCTG	2802	609	264	455	565	699	1123	474	959	741	1244	1370	349	168	143	194	344	57	111	131	1031	325	557	63	139	201
Arid1a	KY008444	CAGGACGGGGGCGCGGGCAA	2971	1214	38	252	275	145	124	427	38	68	102	139	316	185	0	9	92	17	15	7	1	15	0	0	3	427
Arid1a	MGLibA_05067	GCCCTGCTGGCCATACGCAC	3759	695	1	0	3	14	3	18	0	6	107	3	4	11	0	1	0	2	3	0	3	3	2	1	1	5
Arid1a	MGLibA_05068	GGTCCCTGTTGTTGCGAGTA	2968	581	78	92	249	3183	29	184	501	126	75	134	116	800	44	166	411	227	155	543	456	4051	59	753	69	27
Arid1a	MGLibA_05069	TAACCCATACTCGCAACAAC	2470	457	1	1	11	1	0	0	74	8	3	0	4	3	3	0	0	0	0	0	0	0	8	0	4	0
Arid1a	MGLibB_05067	AGTGTCGCGCAGTCTCGCTC	2812	675	3	35	64	47	0	0	53	16	40	10	37	5	5	5	16	0	87	1	0	5	3	4	1	10
Arid1a	MGLibB_05068	TGAGCGAGACTGCGCGACAC	2615	317	6	1	0	0	6	5	1	6	5	0	1	7	0	0	0	1	0	0	0	2	0	0	2	0
Arid1a	MGLibB_05069	CTGCTGCTGATACGAAGGCT	3436	925	4	4	1	20	14	67	89	5	6	140	3	20	0	0	60	2	0	19	1	15	31	5	6	3
Arid1b	KY008445	CCCGCGCCGGTCGCCGTGCC	8917	3036	152	452	511	2010	316	275	242	966	329	503	231	174	17	23	24	78	5	30	19	158	62	20	31	133
Arid1b	KY008446	CGGCTATGGGAGCTCGTCCT	2408	643	1	13	3	26	60	56	3	1	0	9	0	6	0	2	1	1	3	5	0	4	1	4	0	8
Arid1b	KY008447	TCTGCCCATGGTCGGTCCGG	9014	1626	51	270	273	708	2222	306	114	140	1336	5150	142	426	95	31	174	51	30	221	68	238	40	171	63	1865
Arid1b	KY008448	TGTCTTACTGGTAGACTCGA	2721	537	14	6	253	38	77	38	2	0	38	0	32	29	98	0	3	0	0	3	0	0	107	0	1	2
Arid1b	KY008449	GCTGAAGGCATTCGTCCCAG	2155	375	16	53	99	43	0	0	20	0	30	26	1	62	2	0	0	10	0	6	3	1	3	0	1	0
Arid1b	MGLibA_05070	CTGTGCACCTGGGGGACCGT	6950	777	5	2	26	24	136	18	3700	22	67	39	190	15	1	0	1	2	3	10	4	19	8	8	4	3
Arid1b	MGLibA_05071	ACAGTACCTGCAGCCGGCGG	2817	460	169	134	277	1767	220	319	199	1188	372	509	210	44	931	652	215	61	36	1862	118	1596	49	224	9	668
Arid1b	MGLibA_05072	AGATCGGACCAGACCTCGAT	1059	157	1	20	0	13	1	0	9	0	0	0	7	1	0	0	0	0	0	0	0	0	0	0	4	2
Arid1b	MGLibB_05070	ATCTCCCCTGCGAGTATTCC	4868	992	40	994	492	337	219	15	38	16	115	49	33	2523	4	23	384	0	5	711	7	1878	7	99	15	3
Arid1b	MGLibB_05071	ACAGCTTGCTGTCCGTACTG	3644	703	7	32	3	2	5	5	15	27	143	123	1	6	1612	3021	221	1980	11	3	31	13	17	4	0	4
Arid2	KY008451	CTCAGCTGCGATATTCCCTA	2904	613	1	0	1	1	1	0	0	0	2	1	6	0	0	1	0	0	0	0	0	0	0	0	2	1
Arid2	KY008452	GCCCGAGAGACGGAACAGTC	1493	434	5	1	76	2	16	1	0	3	0	13	1	2	0	0	16	0	0	7	0	17	8	0	3	0
Arid2	KY008453	GTACCGCAGAGTCGTATGTT	3051	1271	37	21	134	433	14	180	41	15	255	18	7	22	25	2	1	0	4	2	0	27	6	2	17	6
Arid2	KY008454	AGAAGTTGTTACGTACTGTG	1417	266	0	0	1	127	740	31	3	0	9	2	15	50	2	1	0	3	4	0	1	75	11	0	4	5
Arid2	MGLibA_05073	TACCAGCAACACAGCGTGTC	3539	1352	144	29	29	213	31	53	190	68	371	26	93	54	38	31	16	19	14	13	13	142	34	27	13	2
Arid2	MGLibA_05074	ATAGCGAAGTCCACTTCATT	3062	779	6	107	11	33	23	2	274	43	26	2	9	6	1	0	3	3	9	9	2	2	16	0	4	1
Arid2	MGLibA_05075	CACTTTACTGCTCGCTAATG	3264	1242	43	5324	184	1449	38	17	56	76	12	1301	166	5	23	25	88	227	41	216	15	1550	441	82	10	46
Arid2	MGLibB_05073	TACCTGACACGCTGTGTTGC	5353	1716	192	2413	82	173	228	302	66	108	316	1867	29	56	24	29	88	48	11	16	4	10	164	13	8974	2992
Arid2	MGLibB_05074	GCCGTTTAAGAAGATCCCTG	2797	869	3	11	6	0	2	6	2	3	4	3	2	2	0	0	0	2	0	2	0	2	3	1	1	5
Arid2	MGLibB_05075	TCCGCCTAAAGTAGTGACTC	3484	1324	24	18	28	241	17	31	7	202	195	5	30	34	5	0	7	1	35	4	3	3	6	437	2	1
Arid4a	KY008470	GTCCAGCAAAGGCATTTCCG	2897	709	9	14	12	600	30	30	36	22	250	15	4	7	406	5	130	175	212	2	67	349	363	122	14	223
Arid4a	KY008471	GTTTGAGTCCGTATTCTCCT	4029	1189	17	430	2046	35	118	40	215	99	202	19	59	6	7	3	5	3	0	7	2	45	34	2	13	11
Arid4a	KY008472	GTGAAGGTCAAGTACGGACG	1631	244	22	2487	188	2915	1	12	132	44	2	8	4916	10	3	79	2	28	55	6250	13	155	8	369	29	77
Arid4a	KY008473	ACTACTACGGATGGAACGTC	2207	286	14	1	0	173	3	10	104	5	1	9	1	4	9	1	144	0	3	4	0	7	0	0	0	0
Arid4a	KY008474	ACTTTGGTTCCCGTCAGGCA	3225	667	64	3	22	11	24	46	80	29	7	8	442	1108	52	1547	27	5	423	11	185	2500	9	0	27	2372
Arid4a	MGLibA_05085	GATGTCAGTGCCAAGTACCG	1861	322	4	0	15	1	22	0	0	22	0	1	16	3	2	0	10	6	1	23	0	6	5	0	1	0
Arid4a	MGLibA_05086	CTCTTAAAGGGCCCTTTACT	2275	595	8	7	28	188	17	11	3	16	2	13	57	8	7	0	18	0	0	0	21	16	253	1	2	2
Arid4a	MGLibA_05087	GGTGCAAGATGACCAAGTAA	712	286	3	4	34	8	19	4	19	4	21	4	2	70	0	0	0	0	0	0	14	4	0	0	63	11
Arid4a	MGLibB_05085	CGGACCTCACTTTGCCTGAA	2836	580	54	25	17	8	10	32	149	6	11	11	37	70	3	0	10	2	2	1	7	0	4	17	1	0
Arid4a	MGLibB_05086	GCAAATTGACAGATGCTAGT	797	629	20	22	155	3	4	28	310	17	5	40	11	8	0	1	19	3	5	5	40	31	8	11	4	6
Arid4a	MGLibB_05087	TGAGCCTGCCTACCTGACAG	4308	886	22	321	75	728	11518	135	1873	164	363	86	4319	444	6	382	5	15	14	12	12	442	36	5	922	10
Arid4b	KY008476	AGCACAGGCCGTTTGTTAAT	2496	549	27	179	77	15	50	7	79	18	100	4	113	90	10	4	166	4	1	3	0	16	10	1	7	15
Arid4b	KY008477	TCAGCAGGCGTCTCCTCTTT	6302	1699	475	13350	736	1688	1156	167	1739	163	36395	3222	24237	586	279	245	33310	49986	116	821	1890	910	977	1594	166	13895
Arid4b	KY008478	CGGTGGCAGAGCTAGGACCG	2762	208	0	0	1	16	520	0	11	38	0	1	10	0	0	0	0	11	2	0	0	19	23	0	0	3
Arid4b	KY008479	GAAGAAGAGCAAGCACGATC	1181	181	0	0	0	4	0	11	67	0	28	0	3	281	0	0	0	0	4	0	4	0	0	0	2	3
Arid4b	MGLibA_05088	GAATCTTGATGGTGCCTATC	2752	760	12	170	10	49	253	21	742	52	475	3	79	33	41	26	54	6644	3896	492	4	1256	7	368	14	212
Arid4b	MGLibA_05089	CCTTCAGTGGGCCCTTTATG	4767	1440	7	29	706	110	1305	38	272	64	97	128	250	326	65	54	1365	22	82	73	11	208	119	61	31	531
Arid4b	MGLibA_05090	ATTGATAACCGCTTCCTGAT	3593	644	78	70	0	1	44	312	15	1	3	22	12	0	3	0	0	0	1	0	0	8	3	2	0	1
Arid4b	MGLibB_05088	TCAGTGCCCACTGTCAAATA	2426	479	2	5	0	40	0	46	1	3	0	2	4	0	0	1	2	0	0	3	0	0	0	2	5	0
Arid4b	MGLibB_05089	AGTTCAGGATGACCACATAA	1382	179	0	0	0	31	12	0	0	25	0	0	10	0	0	0	0	0	0	1	38	0	0	0	0	1
Arid4b	MGLibB_05090	ACAGAAGGCTCCTCTGTATT	2354	331	1	7	11	56	4	21	9	2	0	2	0	0	2	1	2	232	0	2	0	3	1	0	0	0
Arnt	KY008689	TACAGAGGGCTATTAAGCGA	1537	349	3061	30	12	0	0	0	3	3	0	0	0	0	0	6	3	0	0	22	3	0	0	2	0	0
Arnt	KY008690	GGGCTATTAAGCGACGGTCA	926	289	11	26	0	109	17	1	36	264	11	59	46	388	37	3	211	2	25	17	2	0	18	0	2	0
Arnt	KY008691	CAAGCTAACCATCTTACGCA	2246	1177	32	35	91	42	519	5	17	27	160	26	33	33	74	3	14	10	2	19	28	1	1	6	0	1
Arnt	KY008692	AGAAACGGCCATGCGTAAGA	1395	427	1078	8130	39	385	5	887	6	691	4	24	912	69	8	172	339	58	11339	69	4	29	10	14	7534	1451
Arnt	KY008693	CAGGTGTGGTACTAGCTCCG	2223	528	81	16	10	199	7	2738	3	4	19	4	21	83	4	0	6	2	9	16	1	6	6	31	0	0
Arnt	MGLibA_05244	GTTAGCTGTAGTCGCCGCCA	4655	1014	52	1155	5186	88	108	87	121	188	667	192	89	36	197	14442	19	91	10	1869	1209	48	40	1958	46	14
Arnt	MGLibA_05245	GCGGCGACTACAGCTAACCC	2122	637	26	24	234	53	51	27	8	9	100	6	189	185	41	0	15	30	0	360	2	1	11	27	2	4
Arnt	MGLibA_05246	GACATCAGATGTACCATCGC	3073	1692	22	40	132	30	76	31	60	91	75	32	20	45	8	2	15	11	56	0	37	24	87	13	8	19
Arnt	MGLibB_05244	GCTCCTCCACCTTGAATCCC	5741	2395	62	10	274	138	795	310	34	37	186	133	36	355	13	4	4	45	109	9	63	94	93	23	111	8
Arnt	MGLibB_05245	GCTCTTTGTCATTACACATC	3557	1566	943	314	89	293	119	71	116	116	184	44	32	281	23	8	77	14	35	12	14	72	50	71	274	15
Arnt	MGLibB_05246	AGATGTGTAATGACAAAGAG	694	322	136	226	14	186	221	12	585	22	106	499	23	241	519	74	6	38	3	54	83	489	126	57	150	39
Arnt2	MGLibA_05235	CGGATCGACGCTTTCCTCCT	5134	1862	101	141	224	558	61	82	135	14	410	64	47	322	5	5	35	50	2	8	1	7	46	6	4	28
Arnt2	MGLibA_05236	ATGGACTTCGATGACGAAGA	1404	319	57	783	7	1226	321	4979	51	907	4	37	11	29	2	238	18	14	21	77	60	154	473	12	33	93
Arnt2	MGLibA_05237	TGGGAGCACGCTTTATGAGC	3700	1243	49	222	178	1117	135	281	144	316	1291	2921	7715	6149	1102	1851	358	234	350	304	742	378	2793	4017	358	310
Arnt2	MGLibB_05235	ACCGGCAACAAATCGACTGA	1751	601	5	5	79	159	877	4	12	14	0	157	2	30	0	5	0	0	39	0	1	0	1	0	1	0
Arnt2	MGLibB_05236	TGTGCGAGACCGCCATGCGC	5976	2754	865	423	178	217	285	46	476	48	56	71	115	69	1	4	87	3	23	26	5	46	29	14	3	31
Arnt2	MGLibB_05237	GGGGCCATGCCTGCCCGAGG	1766	1001	32	25	16	44	436	16	376	45	245	14	10	219	37	0	73	0	13	2	28	2	13	4	4	0
Arrb1	KY008742	CTGACCTGCGCCTTCCGGTA	5174	1495	1160	4401	58	228	35	426	42	8025	137	16	29	509	47	507	13042	367	4	372	613	2242	21	99	457	5743
Arrb1	KY008743	CTGCGCCTTCCGGTATGGCC	5274	1349	13	19	13	18	237	7	38	2	99	5	38	15	8	0	3	7	6	4	5	16	11	6	21	2
Arrb1	KY008744	GGCTTCTTGTCCTCGGGGGC	3026	723	4	132	66	3718	19	32	51	12	25	1	8	2	28	5	2	6	1	1	2	2	3	2	3	10
Arrb1	KY008745	TGTGCGGCTAGTCATCCGGA	3267	612	86	78	107	150	18	177	38	31	295	47	26	15	0	3	3	24	4	8	18	10	32	2	6	3
Arrb1	KY008746	CAGTGATGCCTCAAGGTGTA	2059	409	56	2	25	1	0	5	35	191	18	19	2	7	0	1	0	1	29	48	1	19	53	17	0	1
Arrb1	MGLibA_05277	ACTCACCCACGGGGTCCACG	2869	667	4	53	25	1091	20	29	5	38	2	9	1281	10	2771	56	2524	10	163	11	2	135	1	841	14736	162
Arrb1	MGLibA_05278	CCGCGGACCATGGGCGACAA	2349	782	3	67	47	39	9	3	7	5	26	6	1490	73	3	0	6	7	0	1	2	6	1	0	5	20
Arrb1	MGLibA_05279	CCGTGTCCCTTTGTCGCCCA	6601	1932	8	146	38	287	34	36	34	25	47	32	54	61	23	2	40	17	289	4	4	86	78	12	51	3
Arrb1	MGLibB_05277	CGCCTTTCTTTGAGATACTC	2524	722	54	1234	3	16	116	422	8	139	336	1557	196	52	3	34	2282	18	12	66	100	197	597	9	34	14
Arrb1	MGLibB_05278	TGTGGACCACATTGACCTCG	4204	1078	298	308	151	198	1729	508	123	511	19	349	79	17	30	23	50	3078	328	140	6	1689	699	3	67	1142
Arrb1	MGLibB_05279	TCCCCCAGATGGTGTGGTCC	4304	1426	337	321	231	3226	1490	1104	4223	177	257	206	3373	2596	40	10	74	357	19	23	47	45	3248	48	38	354
Asf1a	KY008993	TCTGGGATGAGTCCTGCATT	3271	1079	238	307	254	538	232	543	2265	763	1648	30	230	747	9	30	236	52	75	383	439	1044	185	8	44	24
Asf1a	KY008994	AATAAATTCTTGACCTCGGT	774	97	1	0	58	19	0	0	3	0	0	2	0	5	0	0	0	0	0	0	0	0	0	0	0	0
Asf1a	MGLibA_05451	CTGATTACTTGCACCTACCG	4688	1065	11	35	121	962	95	41	12	203	28	73	16	47	388	164	17	20	2095	347	1	36	13	13	52	25
Asf1a	MGLibA_05452	GATCACCTTCGAGTGCATCG	2159	1000	54	27	35	74	49	22	16	16	1252	14	38	95	8	0	6	8	6	17	8	9	9	3	6	6
Asf1a	MGLibA_05453	CAGGTCCTCGATGCACTCGA	4460	1848	109	446	78	40	283	160	907	173	14271	19	189	262	18	5	4	12	4	8	23	22	17	11	21	15
Asf1a	MGLibB_05451	TAGGCTGATGCACCGAATGC	5749	2009	43	332	1363	5497	479	40	260	368	179	794	96	701	1117	62	232	809	42	815	45	27	930	893	158	93
Asf1a	MGLibB_05452	TGCATTACCGTCAGCGTCAA	4261	2143	23	861	93	835	125	25	245	50	42	448	86	4197	4	1	8	7	22	91	56	25	46	2	279	70
Asf1a	MGLibB_05453	TGTTATGTTAGAATCCCACA	1787	346	28	201	0	57	2	1	1335	35	6	1	2182	4	1	3	1164	4	0	6	6	10	0	2	1	3
Asf1b	KY008995	GAGTGGAAGATCATTTATGT	1636	532	36	0	1	78	24	8	25	11	30	4	9	93	5	5	2	10	0	0	4	9	6	1	2	11
Asf1b	KY008996	CATTCCTGAGACGGACGCCG	1951	683	19	501	204	2597	1415	1258	94	26	2273	25	1001	155	417	38	680	638	230	27	150	71	262	248	22	2110
Asf1b	KY008997	ATTCCTGAGACGGACGCCGT	1780	333	15	4	38	13	34	4	5	5	11	19	8	18	20	461	32	1	7	1	0	574	44	57	0	102
Asf1b	KY008998	TGGACAAGAGTTCATCCGTG	3176	1492	300	2631	554	288	641	137	196	77	116	43	149	1047	336	15	11	171	42	455	41	454	18	3	489	172
Asf1b	MGLibA_05454	CGCGGTGATGGCCAAGGTGT	3735	1283	11	26	8	15	83	86	25	71	64	69	27	75	7	6	11	4	5	68	26	9	12	18	2	9
Asf1b	MGLibA_05455	CACATTCAGCACCGACACCT	4207	1126	44	86	76	180	117	48	46	26	68	43	37	40	14	1	52	1	18	70	2	70	263	43	1	13
Asf1b	MGLibA_05456	GGTGGGTTCTCTCGAAGCTC	856	248	0	22	2	9	6	1	10	9	6	0	6	29	406	11	0	2	0	0	0	8	8	1	1	2
Asf1b	MGLibB_05454	TGTCCCAGTTGATATGGAAT	3235	1132	3	104	47	82	25	16	95	1	852	24	585	252	0	3	52	15	3	13	3	6	11	8	26	0
Asf1b	MGLibB_05455	TGTTGACATAGTAGCCCACA	2327	405	325	21	7	0	45	63	75	8	11	47	9	475	957	420	500	83	3	533	3	3	0	0	1	6
Asf1b	MGLibB_05456	CATAAATGATCTTCCACTCC	4391	1692	14	105	230	237	92	241	114	484	185	22	183	93	17	4	19	8	8	16	54	39	93	23	74	48
Ash1l	KY009010	CTCGCAAGCGGAATCGAGAA	704	65	0	0	0	4	0	0	0	1	0	1	0	0	0	0	0	0	0	0	1	0	0	0	0	0
Ash1l	KY009011	ACTTGGCACCGTAGTTGGAC	3188	558	19	37	84	6	53	94	103	1	348	505	8	5	9	68	25	0	699	2306	60	44	316	8	699	56
Ash1l	KY009012	AATCTTCTTCGTAACATCCT	3044	584	1	16	1	129	11	5	91	15	3	4	7	20	23	3	5	0	1	0	1	4	24	4	4	16
Ash1l	KY009013	ACTTTGGCAATCGGCGTTTA	1160	291	1	25	2	6	0	1	2	1	0	3	0	2	0	0	0	0	0	0	1	1	0	0	1	3
Ash1l	KY009014	GCCATCTCTGGAGGTACGCT	3390	856	17	4	293	127	82	53	73	76	73	58	153	21	12	8	1	9	8	29	7	151	5	6	3	8
Ash1l	MGLibA_05463	GGGCATTTCCGAGGTCGACC	1903	586	16	88	54	157	178	130	13	1194	153	14	228	24	2	3	368	31	23	12	23	5	275	28	55	8
Ash1l	MGLibA_05464	AGCCCTGTTAGTAGTGACGC	3908	571	76	1732	24	8	10	42	16	41	1746	15	199	13094	7	6	1	35	10	0	3	10	3	10	3	18
Ash1l	MGLibA_05465	TTAGGACTTGGCACCGTAGT	3886	734	18	302	32	332	60	33	457	160	957	174	55	94	14	9	16	4	0	45	5	17	21	20	22	21
Ash1l	MGLibB_05463	ATTGTAGCCCTACTCGTAAA	1872	264	0	0	0	4	0	9	6	1	0	3	26	4	0	0	0	0	0	0	0	1	0	0	0	0
Ash1l	MGLibB_05464	AAGGTTTATCGGAAGCTGAC	1688	278	918	12	0	1	4	0	0	1	5	0	0	0	28	29	1	0	24	0	3	748	0	2	0	17
Ash1l	MGLibB_05465	GGCCGCCCAGTTTGTCAGCC	2898	1054	10899	376	425	113	1116	51	101	90	201	158	48	83	7	2	22	26	147	375	431	255	54	6	37	2
Ash2l	KY009015	TCCATCTTGCTGCTTACGCT	6582	1411	158	476	261	375	60	2885	531	301	333	3374	2541	2510	473	302	1414	44	1287	63	340	1176	381	78	113	761
Ash2l	KY009018	GTGCCTTGGCGAATTTGACG	2764	185	44	65	1	11	20	15	130	14	1	5	44	59	224	11	526	21	442	103	1176	26	494	5	96	22
Ash2l	KY009019	TGCTTGCTTCCGGAGAAAGT	2491	99	0	0	21	0	0	0	0	2	0	0	0	0	0	0	0	0	0	0	0	0	0	0	0	0
Ash2l	MGLibA_05466	TGGTTCACCGCTGACACCTT	5108	612	1002	18	9	13	28	1	117	5	15	17	493	8	38	4	128	1	19	1	1	6	13	1	111	15
Ash2l	MGLibA_05467	CTGCCACGTCAAATTCGCCA	4780	210	0	1	0	0	0	17	0	0	1	0	2	3	0	4	0	35	0	0	4	6	1	0	0	0
Ash2l	MGLibA_05468	GACGTGGCAGTCTCGAACAC	1924	159	1	26	0	28	4	0	0	1	0	1	6	1	0	0	2	3	1	1	0	2	0	0	0	0
Ash2l	MGLibB_05466	TCACGACGTGTCTATTCCAA	3252	389	33	37	105	49	80	0	302	16	15	1	3	20	2	63	13	7	309	4	35	24	0	1	42	53
Ash2l	MGLibB_05467	ATTGCAATGGAAGCTGTAGT	1764	185	7	5	0	55	5	1	0	1	11	0	0	0	1	1	0	2	4	0	2	0	0	0	0	0
Ash2l	MGLibB_05468	CAATAACATTGTCAAAACAA	669	121	45	0	0	1	1	0	0	0	0	0	0	0	0	0	0	0	0	0	0	1	3	0	0	0
Asxl1	KY009108	AGACTATACATACCTGACGC	3644	188	669	27	0	0	0	1	0	0	1	29	2	0	0	2	2	3	0	0	0	0	353	0	10	0
Asxl1	KY009109	CCCAACACCCGTCAACGGGA	1645	206	1	1	0	5	0	5	1	1	0	1	0	4	2	3	0	0	2	0	0	4	70	0	4	0
Asxl1	KY009110	TCCGTCCCGTTGACGGGTGT	5261	2285	634	823	3448	2251	1589	1680	850	605	1345	851	3044	668	3321	586	1756	894	1170	647	145	240	1988	211	323	60
Asxl1	KY009111	AGGACTGACGATCTTCAAGC	1708	407	83	96	20	332	252	187	55	294	76	68	40	129	11	3	67	108	8	89	30	72	256	21	76	17
Asxl1	KY009112	CCCCCGGATCGTCCCCATCA	5221	1652	132	229	460	2141	372	259	2174	292	2511	173	1597	343	1127	29	29	795	38	76	127	869	487	587	333	2052
Asxl1	MGLibA_05550	GCCAGAGGACTCCGCTGATG	3002	431	1	86	2	1	2	2	12	1	16	1	1	84	0	0	0	0	0	4	6	2	23	6	12	4
Asxl1	MGLibA_05551	ATGGCATTGAGGCACGCAAG	2505	370	14	1	18	9	4	273	1	3	4	0	34	0	1	0	2	0	2	2	0	0	6	6	0	0
Asxl1	MGLibA_05552	TGAGTGTGAAAAGACTAATG	1240	545	9	7	4	42	2	3	0	7	125	0	6	25	2	0	0	11	2	3	0	4	19	1	9	1
Asxl1	MGLibB_05550	ATGACCTGCAGAATCTGTTT	2364	361	18	20	15	0	152	0	28	5	0	313	2	0	1	0	1	0	0	0	5	0	0	6	2	3
Asxl1	MGLibB_05551	GACACCAAAACAGATTCTGC	1491	70	0	0	0	0	2	0	0	4	0	0	3	2	0	0	0	0	0	0	0	0	0	0	0	0
Asxl1	MGLibB_05552	CCCACAGCTTTCCACATCAG	2988	265	1	1	2	17	54	1	8	5	20	6	3	1	2	0	1	1	2	19	2	2	2	0	1	1
Asxl2	MGLibA_05553	GTATACACGCCCATTCTACC	2557	352	0	30	6	289	548	4	70	7	61	17	29	5	40	0	0	1	10	6	0	3	1	2	35	1
Asxl2	MGLibA_05554	AATGGGCGTGTATACTTTGA	2711	374	3	6	2	6	2	128	3	0	0	6	0	1	0	0	0	0	1	0	0	0	2	0	3	2
Asxl2	MGLibA_05555	GACAGCTCTTTCACTCCATC	3598	676	15	180	3	82	26	48	33	1958	79	7384	5	44	9	782	43	2	2116	387	423	24	7	11	10	181
Asxl2	MGLibB_05553	GAGTCATAAAGAAATTCTTC	646	65	0	0	0	9	0	3	1	0	100	0	3	1	0	1	0	0	1	0	2	19	41	0	0	1
Asxl2	MGLibB_05554	AAGAATTTCTTTATGACTCA	1125	417	5	45	6	139	8	2	96	1	4	358	4	21	4	1	3	7	310	3	1	3	0	2	0	4
Asxl2	MGLibB_05555	TTTCAGAAAGATGTGCCAGA	1700	207	1	0	96	0	6	0	0	0	0	0	0	12	0	0	0	0	0	0	0	0	4	0	0	0
Asxl3	KY009115	AGCCCTCCAAGTCCCCCGAT	3323	821	14624	932	349	613	764	125	319	26	108	2441	1149	491	45	833	347	242	6	207	20	228	258	136	496	176
Asxl3	KY009116	ACTATCTTCACTTCGATGTG	4269	1083	948	114	470	123	19	26	44	111	56	9297	348	166299	4643	64	394	8	7	65	3	4065	3	289	6	339
Asxl3	KY009117	TGTCATTTCTTATCCCATCG	6325	1409	9	52	452	85	79	251	121	3	148	28	24	59	20860	252	27	61	2	18	3	22	311	4	334	19
Asxl3	MGLibA_05556	GAGCAGTCGGATTCGCCTTC	2578	731	132	129	10217	2606	128	255	118	264	41	65	954	612	309	2	7	261	2679	34	25	97	50	620	95	23
Asxl3	MGLibA_05557	TTTGCACTGCCGTGTTCGTA	4457	1270	24	48	23	21	29	28	18	180	31	130	1158	62	103	7	10	853	20	6	1	4	37	0	18	10
Asxl3	MGLibA_05558	AGATTGCAGCCTTACGAACA	1939	231	5	29	1	31	5	13	0	24	1	5	5	11	0	0	5	10	0	6	2	6	6	4	6	8
Asxl3	MGLibB_05556	TTAGGATCCGAGTCTAAAAA	568	209	50	15	57	647	27	21	247	28	32	2521	88	10	3	7	125	1	0	1	10	20	9	2	1	1
Asxl3	MGLibB_05557	CTGCCATCTCAGCGCCATCC	5907	2224	19	117	2736	675	1221	61	159	357	1113	80	1220	90	1063	55	16	118	147	24	941	144	1110	32	139	473
Asxl3	MGLibB_05558	TGCTCATCAGACACCTTTAA	2198	790	37	37	16	17	398	44	85	389	177	25	43	40	11	0	3	0	53	9	3	281	15	0	115	1
Asz1	KY009119	AACCTGAGTATGACCGTCTC	3294	447	1	60	2	0	5	0	2	21	11	5	2	0	0	7	50	0	0	3	1	22	0	0	178	0
Asz1	KY009121	TGCCCGAGACGGTCATACTC	5028	1971	90	263	297	107	680	19	119	40	186	94	59	1351	235	1	34	152	5	81	17	156	228	104	87	27
Asz1	KY009122	AACTAAAGAAATATCTCCGG	835	37	2	0	0	0	1	0	0	0	0	0	0	0	0	0	0	0	0	0	0	0	0	0	0	0
Asz1	MGLibA_05559	TCTTATGTATGCCGCTAGTG	4897	975	18	327	6	396	210	50	51	59	218	87	1101	156	12	0	2	13	115	233	6	12	18	2	2	4
Asz1	MGLibA_05560	CGGAGCCGAAGTTAACGCCC	2634	309	16	3	2	1	139	15	17	3	2	0	26	61	0	6	0	28	0	1	1	3	1	2	3	0
Asz1	MGLibA_05561	CAACCTGAGTATGACCGTCT	5346	851	42	206	41	451	23	423	40	6	3	56	89	64	1	3	3	127	5	17	3	52	63	6	1433	31
Asz1	MGLibB_05559	AGAGCTGGTTCGCTTCCTTT	2674	602	7	4	1	8	32	23	11	22	892	43	49	0	1	0	2	0	10	0	1	81	195	3	14	592
Asz1	MGLibB_05560	ATAAGTGCTTGTTCTGCTCG	1977	157	0	4	2	10	4	8	10	5	123	0	14	585	0	0	0	0	2	0	0	332	7	0	0	130
Asz1	MGLibB_05561	TCTTACCTACAAGCAGTATT	3259	757	1276	1548	70	979	1258	91	1181	116	418	486	315	135	863	6513	22	81	668	97	36	8	38	8	75	82
Atad2	KY009128	TCTGCGGGTACCGTCGACGC	3327	658	22	81	2	47	11	6	83	592	109	51	36	136	639	1	5	1	58	21	4	574	302	4	8	5
Atad2	KY009129	GACCGGGCCTCCGTAAAGCA	2037	781	102	13	1162	7	332	9	677	1010	141	2217	9	110	8	17	12	3	4	1	4	12	20	4	285	12
Atad2	KY009130	CTGCTCATTCGTTTACAATA	2919	1102	64	139	22	110	186	325	365	25	9	36	59	45	5	8	8	32	19	8	29	21	21	1	43	18
Atad2	KY009132	CGGCCCAGATTGCGCCGAGC	3054	658	27	53	1435	1153	29	975	14	89	33	85	185	273	1661	25	427	2272	11	8	3	159	191	17	51	5
Atad2	MGLibA_05568	ACCACAACACGCGCTCTTTA	2278	617	252	28	24	7	109	23	11	16	92	5	15	22	39	1	62	8	3	47	15	31	128	13	5	4
Atad2	MGLibA_05569	TAGGCAATTTGCTCGACAGC	2291	276	0	11	12	247	15	1	2	29	43	1	248	42	10	1	4	0	0	8	1	59	0	5	806	6
Atad2	MGLibA_05570	TTCCTCAATGAGCGAATAAC	1528	228	10	2	0	0	0	0	0	18	1	10	1	0	20	0	0	1	0	1	0	0	7	1	0	0
Atad2	MGLibB_05568	ACCTTAAAGAGCGCGTGTTG	2219	293	8	7	804	30	0	32	5	343	9	855	285	7717	7	12	2	9	11	181	12	3	22	2	5	7
Atad2	MGLibB_05569	TCGTGCAAATGTTCTGCAGT	3815	673	61	46	4	5	4	1	17	11	6	3	6	8	0	10	4	11	3	4	35	3	178	65	7	1
Atad2	MGLibB_05570	TGAAAAAGATGCGCAGACAG	1047	439	14	54	1	16	18	7	0	2	87	72	5	1	0	0	0	0	0	1	0	0	1	0	1	3
Atad2b	KY009133	CCGCTCCTCTAAGACGCGCG	1927	280	5	8	4	681	43	1	4	0	3	17	1	15	35	0	0	0	0	1	4	31	2	18	1	18
Atad2b	KY009134	CGGCTGTTTCAAAGTGCGTT	1706	368	314	1	15	317	1	6	8	0	1	1	54	29	4	0	7	17	4	0	0	0	2	0	0	0
Atad2b	KY009135	TCAGAAAAAGTTGTCGGTCC	2086	610	294	13364	268	134	26	7	889	47	430	30	76	620	3914	39	4	8	134078	6	39	21	0	1	16	11
Atad2b	KY009137	CCATCATATTCACGCTTTGA	5257	1871	189	3585	473	609	715	354	115	555	2780	353	627	945	337	99	6311	4065	49	62	1057	308	769	66	1163	72
Atad2b	MGLibA_05565	ATCCGACGAAACCGTCGATC	1697	861	110	698	629	727	2792	1429	220	41	84	535	509	140	68	5	274	41	71	23	350	60	3599	65	168	34
Atad2b	MGLibA_05566	TCTCTACTTCGCCTGATCGA	6876	1795	12952	8027	7820	7726	22314	3728	1603	34898	1083	8695	10442	10861	13776	936	73358	4266	152	4147	160288	13284	3797	1486	46488	8002
Atad2b	MGLibA_05567	CACAAGCTACTATGTCCGTT	3843	861	4	6	11	145	92	19	11	9	202	4	143	4	2	0	8	2	1	0	0	13	2	0	3	2
Atad2b	MGLibB_05565	TGTTTCAAAGTGCGTTTGGC	5748	1206	31	14	248	8842	61	338	8	16	20	6	17	7	7	13	4	42	0	11	29	3	371	0	5	36
Atad2b	MGLibB_05566	GGCGACCTTTCATGTATAAA	799	457	7	32	111	15	1	242	84	90	78	113	29	46	3	2	248	80	4	13	6	3	27	30	1074	12
Atad2b	MGLibB_05567	CTTCGAAGCCACCCCCTTCG	7235	2084	767	4969	2343	4699	9390	1051	1274	1776	4571	11219	1987	8403	1694	2060	1408	625	634	525	2582	835	3398	743	1155	794
Atf7ip	KY009199	TGAACCGGTCGCAAGGGTCG	3170	686	1435	5622	3833	794	1949	920	3047	674	1254	452	4029	3812	9584	213	1382	2076	10264	59	415	943	1540	961	255	676
Atf7ip	KY009200	GCCGCCACGACCCTTGCGAC	5814	974	10	60	10	5	19	12	17	68	75	6	36	7	0	0	0	2	7	9	27	13	3	2	14	2
Atf7ip	KY009201	AGACTGTGAATCACCGGAGG	1588	317	1	10	8	1	9	1	0	1	2	5	3	22	1	0	1	0	0	0	0	3	0	0	1	0
Atf7ip	KY009202	TCGAGAGCAGGCTCAGCGAT	1992	525	15	18	111	229	69	108	44	10	12	41	78	102	1	1	37	7	1	9	1	2	7	2	9	32
Atf7ip	MGLibA_05610	CCGTACGTACTTCTCACAGG	4571	988	12	2	979	208	63	611	27	984	141	1	4	0	0	2	6	12	6	1	16	60	6	3	0	0
Atf7ip	MGLibA_05611	TCCAAAACGTTTGGTTAACC	1605	821	0	0	1	0	0	16	257	3	0	5	1	1	0	0	0	0	2	0	4	0	0	0	11	3
Atf7ip	MGLibA_05612	GGCAGTGCTCACCGAGCTGC	4528	1043	8	73	10	82	16	1	15	4	40	13	8	24	0	0	119	1	2	6	7	4	8	4	1	0
Atf7ip	MGLibB_05610	TGCTGTGTTTGATAAGACGT	3441	414	3	0	1	1	6	1	0	1	4	0	0	16	0	0	0	1	1	0	0	0	0	0	2	0
Atf7ip	MGLibB_05611	ATTCTTCATCCATATATCGC	3252	380	18	35	937	273	1199	84	27	20	507	254	25	55	24	66	7	4	80	234	11	115	26	23	456	17
Atf7ip	MGLibB_05612	AGAGGAGCGAGTTCCAGCCG	1639	214	0	0	0	1	1	17	0	0	2	3	1	1	3	0	2	1	0	0	0	0	0	1	0	0
Atp6v0c	MGLibA_05868	ATGCTCACCGCTGAAGACCA	2673	55	0	1	0	0	9	0	22	0	0	0	0	2	1	0	0	0	1	0	0	0	0	0	0	0
Atp6v0c	MGLibA_05869	TGCGATGCCAGTGCCACTCT	8261	104	0	0	0	4	1	0	0	0	2	0	3	6	0	0	0	1	0	0	0	1	2	2	11	0
Atp6v0c	MGLibA_05870	ACAGCCATGGGAGCCGCCTA	3105	112	0	21	0	28	1	5	2	3	1	3	1	1	0	0	2	0	0	0	0	0	0	0	0	0
Atp6v0c	MGLibB_05868	CATGGGCGCCTCGTCCGCCA	4741	108	0	1	0	2	0	0	2	0	0	0	1	0	0	0	0	0	0	0	3	0	2	0	0	1
Atp6v0c	MGLibB_05869	AAAAGGACTACTTTGTGGAG	656	13	0	0	0	3	0	0	0	0	0	0	0	0	0	0	0	0	0	0	0	0	0	0	0	0
Atp6v0c	MGLibB_05870	GGCCTGAGTGTGGGGCTGAG	2314	78	0	22	14	4	1	10	0	203	3	4	0	0	2	0	1	0	0	52	6	2	0	1	0	0
Atrx	KY009736	TCATCTGAATTCGACATTGC	4760	1665	1333	3005	86	45	3091	769	819	2587	2079	220	463	56	1120	117	25	453	806	6968	32	1376	3150	6976	41	3947
Atrx	KY009737	CTTTCTGTCTGTCGCCTCAA	6019	667	0	40	3	7	527	1	13	7	31	13	15	4	0	0	1	1	2	0	3	2	0	0	2	6
Atrx	KY009738	ACGTGGGGATCTTCGAAGAT	1551	270	2	4	0	2	0	22	6	34	5	2	0	0	0	2	0	0	0	0	0	3	1	1	81	0
Atrx	KY009739	ATCAAGGAGACGGCAACAGT	1257	100	0	10	0	0	2	0	0	0	0	0	0	5	0	0	0	0	0	0	0	0	18	1	0	3
Atrx	KY009740	GACAATCTCAAAAAACGCGG	768	68	0	0	0	0	0	0	0	1	0	0	0	1	0	0	0	0	1	0	0	0	0	0	192	0
Atrx	MGLibA_05976	CTTTGGTTCATGACAAGTCG	2457	444	11	41	22	44	6	7	2	381	17	1	1	234	4	1	21	0	1	0	8	0	0	0	0	1
Atrx	MGLibA_05977	TTCATTTACATTCTCATCCG	6800	1546	123	370	297	59	35	2	61	88	38	24	2125	92	60	64	42	86	16	146	18	406	1139	6	257	9
Atrx	MGLibA_05978	TGGAAACAAGTTGAGTACAT	1572	524	57	123	15	22	2	458	0	26	15	9	39	9	0	0	2	1	2	1	0	2	0	1	2	1
Atrx	MGLibB_05976	TGGACTTAATTCTGATATGA	2229	635	32	24	1	225	8	0	3	7	10	0	29	22	12	236	4	0	36	0	0	1	43	9	2249	25
Atrx	MGLibB_05977	ACTATGCAAAGCTTGCCAAA	1038	140	3	1	0	10	0	0	0	0	1	175	0	0	0	0	0	2	1	0	1	0	29	0	0	0
Atrx	MGLibB_05978	CCTTGATGAACCTGAAGATC	2542	416	12	9	56	8	38	10	41	0	3	8	40	0	1065	9	14	109	4	0	0	5	5	10	0	0
Aurka	KY009830	TGGAGATCCAGTCGCACCTG	4454	131	0	0	0	0	0	0	0	0	0	0	0	1	0	0	0	0	0	1	0	0	0	2	0	0
Aurka	KY009831	ACAGCTGGAGAAGGCGAACG	1306	7	0	0	0	0	0	0	0	0	0	0	0	0	1	0	0	0	0	0	0	0	0	0	0	0
Aurka	KY009832	AGAAGGACACAGGACCCGCT	1499	170	91	21	24	21	632	24	67	44	45	1	9	8	2	18	0	7	67	11	0	645	20	6	4	0
Aurka	KY009834	CTTCGGTCCGAAACGCGTCT	3629	464	7	5	1032	69	53	24	102	16	9	25	46	20	7	9	25	2	0	6	2	2	19	2	1	3
Aurka	MGLibA_06024	TCAGTCACCAAGACGCGTTT	3101	364	2	45	2	3	3	0	1	1	0	0	2	0	0	2	0	0	0	0	0	0	4	0	22	3
Aurka	MGLibA_06025	CCACTCACCGCAGGTGCGAC	3612	408	3	1	3	6	42	1	28	0	5	1787	5	15	0	0	8	2	5	1	6	7	26	1	3	0
Aurka	MGLibA_06026	GACCACTTACCGGAGGCTGC	2373	145	0	15	6	0	562	8	7	2	19	7	0	25	0	0	0	0	0	0	0	0	1	0	2	0
Aurka	MGLibB_06024	CGAACGTGGAGCACCAGCTT	2717	54	1	7	1	158	0	0	2	0	0	1	1	1	0	0	0	0	0	3	0	0	0	0	0	0
Aurka	MGLibB_06025	ATTCTGTACCTTAACAGGCC	3342	158	0	0	11	12	0	7	0	1	49	2	1	0	0	0	0	0	0	0	2	3	2	0	0	0
Aurka	MGLibB_06026	GTAAAGAAAACTGTGTCTCC	1316	140	0	0	0	0	0	0	0	0	1	0	0	0	0	0	0	0	8	0	0	0	0	0	0	0
Aurkb	KY009840	GAAGAAGAGCCGTTTCATCG	1426	20	0	1	60	5	0	0	6	0	0	4	0	1	2	11	0	0	0	1	0	0	0	0	0	1
Aurkb	KY009842	TCCTGGAATACGCCCCTCGC	6874	400	1	29	0	14	4	32	7562	13	13	19	66	4	0	0	5	3	0	1	5	5	3	0	0	689
Aurkb	KY009843	CCTTGTAGAGTTCCCCGCGA	3818	40	0	0	0	0	0	0	0	0	0	4	0	0	0	0	0	0	0	0	0	0	0	0	0	0
Aurkb	MGLibA_06027	TCCTTGTAGAGTTCCCCGCG	4376	62	1	0	0	0	0	0	0	1	2	3	0	0	0	0	0	0	2	3	3	0	0	2	0	0
Aurkb	MGLibA_06028	TTTCGATCTCTCGGCGAAGC	2356	549	59	172	257	31	13	440	195	46	124	59	3	124	1	1	1	2	3	24	5	5	6	4	2	2
Aurkb	MGLibA_06029	CGATGAGCAGCGGACTGCCA	1826	154	1	62	0	0	4	3	0	0	3	0	2	1	1	2	0	0	3	0	1	0	1	0	0	0
Aurkb	MGLibB_06027	TCGCCGAGAGATCGAAATCC	1849	193	0	127	0	24	2	5	13	33	6	1	35	1	2	2	2	0	0	3	0	3	0	0	0	0
Aurkb	MGLibB_06028	GAGAGCAAGCGCAGATGTCG	1842	260	1	3	0	13	31	1	4	0	1	9	3	28	88	0	0	0	2	1	1	0	0	0	0	0
Aurkb	MGLibB_06029	CAGGGCTCCACTGCCTCGCA	3174	479	17	19	38	37	33	3	15	5	44	289	157	6	0	2	7	1	1	447	7	16	3	0	0	2
Aurkc	KY009845	GGACCAGCAGCGTACAGCCA	2147	390	6	20	1	17	12	10	45	3	3	74	9	33	0	0	2	1	3	89	0	3	10	2	1	1
Aurkc	KY009846	TTTGTTCTCACAGATAATAC	1470	600	84	172	397	75	150	211	2018	2735	68	11	41	239	68	7	71	5453	8951	12	19	632	2	16	371	7957
Aurkc	MGLibA_06030	TCACCGTGGCTGTACGCTGC	8474	2268	33	95	75	187	91	134	432	84	366	552	102	231	25	436	82	8	148	39	7	743	126	48	102	27
Aurkc	MGLibA_06031	CACTCACCTGGTTGAGGTGC	3660	1113	46	772	34	34	70	8	159	20	59	0	30	24	4	0	6	2	0	4	3	1	3	0	2	9
Aurkc	MGLibA_06032	TTCCTTAGCTACTGGCCAGA	2945	523	39	14	1419	103	26	2	1126	5	27	9	6	9	15	736	2	1	4	1	137	139	8	5	15	2
Aurkc	MGLibB_06030	AGGCTTACTGTAGGTGTGCC	2045	395	42	188	146	158	35	9	53	171	10	181	12	59	158	1112	1063	27	3	16	32	104	97	17	1	95
Aurkc	MGLibB_06031	ACCATCAATGACTTTGAAAT	1812	524	89	13	57	391	146	2	1	7	25	1	10	1	12	0	2	6	7	2	0	0	9	3	1	0
Aurkc	MGLibB_06032	ACTACTTCTATGATGACACT	3184	871	7	221	34	23	58	1	67	14	28	4	7	11	16	0	24	7	7	1	0	0	2	3	14	4
B2m	KY010010	TCACGCCACCCACCGGAGAA	3054	410	45	11	151	35	2	15	41	118	2645	3615	100	38	5	6	33	440	3499	1798	56	260	1695	23	510	555
B2m	KY010011	CACGCCACCCACCGGAGAAT	3389	667	14	71	17	14	15	89	10	95	62	336	2780	24	100	35	133	16040	410	89	55	5578	4	36	16	15
B2m	KY010012	TTCGGCTTCCCATTCTCCGG	9090	1493	106	5780	123	2839	1864	285	188	43	301	1043	1972	506	1049	19	505	215	35	1374	1902	107	460	2968	73	88
B2m	KY010013	GGATTTCAATGTGAGGCGGG	1418	510	7	3	15	124	258	0	3	0	23	2	198	5	1	0	1	1	2	2	37	0	32	0	0	3
B2m	MGLibA_06111	AGTATACTCACGCCACCCAC	3787	456	4	0	1	4	732	40	1	8	47	16	14	1	2	1	4	64	12	1	0	2	448	12	0	1
B2m	MGLibA_06112	AGTCGTCAGCATGGCTCGCT	2458	1114	60	138	43	619	73	178	558	15	71	73	139	633	433	5775	216	124	288	59	203	1409	501	783	90	334
B2m	MGLibA_06113	CCGAGCCCAAGACCGTCTAC	4111	1070	49	145	142	373	927	1738	928	385	657	91	724	116	180	21	20	2762	739	91	3705	28	410	515	138	43
B2m	MGLibB_06111	CTGGTGCTTGTCTCACTGAC	4200	1703	8256	2007	507	448	363	99	1345	793	875	1213	1182	1082	7463	18633	650	414	14066	4973	5113	2508	309	11129	102	3830
B2m	MGLibB_06112	ACGTAGCAGTTCAGTATGTT	4413	1226	4	62	98	16	101	69	8	88	70	35	1226	12	13	143	70	4	4	0	4	18	131	14	47	0
B2m	MGLibB_06113	CGTATGTATCAGTCTCAGTG	4847	738	29	1035	5	1592	30	141	520	78	183	9	46	2	81	18	2242	615	53	40	55	1059	1347	54	2416	145
Bahcc1	KY010265	CCCTCTGAGCCGGCCTACCG	3639	542	6	351	9	1104	599	193	22073	19	115	14	2	91	66	8372	25	3	7	0	559	1	1	48	0	6
Bahcc1	KY010266	GAAGGCTCCGTTCGTGGGCC	2735	768	8	28	8	50	83	172	3	0	42	28	1	5	1	4	248	0	35	1	0	14	4	2	1	112
Bahcc1	KY010267	AGGCAGCCTCGATGCGGTCC	3785	865	11	172	15	33	547	26	106	314	15	20	91	36	2	13	0	10	12	2	13	19	14	4	25	390
Bahcc1	KY010268	CCCGTCTGTACACCCCACGG	5015	865	30	95	404	308	22	64	45	22	56	3	14	17	2	4	13	4	6	6	8	6	2	40	35	6
Bahcc1	KY010269	CCCAGGGAGGAACGTCCTTG	1986	498	0	3	12	11	0	10	1	12	19	0	7	2	0	0	0	110	0	0	0	5	0	0	0	33
Bahcc1	MGLibA_06492	CGAGACGAAACGCAAGTCCG	2456	430	0	52	10	3	0	8	1	1	4	1	5	1	0	11	3	34	28	2	0	0	0	0	1	1
Bahcc1	MGLibA_06493	ACCGACCATGGTGCACCCTA	4001	647	9	1	2	0	93	275	8	19	38	25	19	115	2	3	1	124	3	11	5	12	7	2	0	2
Bahcc1	MGLibA_06494	TGTAACAGCAGCTCACGTCC	3690	818	7	40	32	674	17	4	34	101	1	169	3	1	2	13	35	3	4	777	25	5	4	24	6	243
Bahcc1	MGLibB_06492	TCCTCGGTAGGCCGGCTCAG	4188	1548	85	227	136	452	79	59	100	75	268	74	458	65	16	9	22	14	9	242	7	387	22	31	30	17
Bahcc1	MGLibB_06493	TCTAGCGCATGGCTGGCACG	2959	482	4	339	1	28	5	2	48	2	28	53	224	22	2	0	2	2	3	0	0	29	6	1	0	0
Bahcc1	MGLibB_06494	GATCCAAGTGGCTCACGGGT	1242	103	54	34	1	2	9	0	10	0	8	14	2	51	0	0	0	0	0	0	0	0	0	0	4	10
Bahd1	KY010270	CCCATTGCGCAAACGTTCAC	2370	567	68	12	2	181	41	21	95	433	0	260	158	182	4	1	3	58	5	7	2	5	13	3	1	20
Bahd1	KY010271	GAGTCCGACCTCGTCCAGTG	4047	1455	7	10	41	10	82	21	33	2	16	3	1	3	2	1	3	7	35	0	0	3	5	1	1	1
Bahd1	KY010272	GCGGGGACCCTCACCGTAGC	1784	592	59	32	319	48	57	50	104	11	23	38	179	223	264	5	0	34	3	160	0	4	8	12	41	4
Bahd1	KY010273	TGAGCACGAGAAGGTCGAAG	1708	610	99	14	82	1586	462	1709	67	74	63	735	105	182	4	2	21	330	3	12	24	836	524	13	161	67
Bahd1	KY010274	GAGGCAGGTTGGGGCGCAAC	2736	760	14	1690	198	71	29	31	754	45	217	42	59	14	2	0	16	25	4	5	3	12	13	3	4	71
Bahd1	MGLibA_06495	CCGAGATGGGCGTCTGAAGA	1553	619	55	2342	471	710	914	233	57	311	321	9	315	8481	31	2	20	5	13	2	45	3	5	8	59	5
Bahd1	MGLibA_06496	TGCCATCCGAAAGAGTTACC	3550	857	89	251	133	30	288	23	58	11	161	143	7	4396	10	8	13	3	42	4	5	8	54	124	21	1
Bahd1	MGLibA_06497	TTACAGGCCTGAGCACTTAC	5023	1383	2409	479	18	88	74	74	322	32	218	493	19	106	332	9	162	8	12	45	30	16	31	217	133	296
Bahd1	MGLibB_06495	CAGAGCGCCAAGCCTCCGAG	1651	241	3	91	2	91	30	37	12	184	37	0	2	7	0	0	8	0	2	20	5	10	2	0	0	5
Bahd1	MGLibB_06496	AAAGACGTCTACACCTTATG	1895	199	25	143	0	1	26	61	11	57	10	25	9	25	0	0	1	0	0	4	97	22	2668	1	13	10
Bahd1	MGLibB_06497	ATAGCACTTCTCTTCAATGC	3689	959	14	20	24	7	41	10	26	46	15	1995	72	119	15	2	26	114	8	2	14	3	0	11	24	18
Baz1a	KY010378	TCTGCTCCTTTTATGCGATC	5333	1812	11362	20151	747	8042	7427	2062	3238	9582	2567	6796	723	9591	3096	900	2288	24746	2191	246	1223	1498	453	398	543	467
Baz1a	KY010379	TTATGTTGATGTGTTGCGAC	3271	617	1	28	87	2	0	2	22	2	32	6	32	23	0	0	0	7	2	311	3	4	3	2	9	0
Baz1a	KY010380	CTTCCTCGTCGCCTGTTAGC	7264	1753	15	105	224	211	3784	12	249	6	54	23	104	36	0	0	13	4	3	3	2	6	17	4	11	15
Baz1a	KY010381	CCTCCCAAACGAATATCTTT	2207	923	12	21	27	20	41	8	82	118	125	14	76	65	3	1	1	0	10	60	2	2	11	2	14	2
Baz1a	KY010382	GCTTCCTGATACGTCAGTCC	5006	1507	28	4327	78	2167	39	44	16	98	22	479	137	110	190	39	37	17	56	508	10	2	77	23	291	11
Baz1a	MGLibA_06570	TGTGCCGTGACGGGTAGACC	5303	1332	487	396	102	23	1570	205	29	53	623	90	3163	129	35	34	1039	35	3	34	11	24	72	22	20	116
Baz1a	MGLibA_06571	GCAAGCGTGAACGACGAGTA	1755	234	1	4	0	5	3	1	3	4	1	1	0	1	13	5	0	0	0	0	0	0	1	4	10	0
Baz1a	MGLibA_06572	CATCAGCGACAGTGACGACT	3341	766	52	25	140	136	17	91	8	720	14	9	499	27	1	2	1	12	0	0	36	0	17	3	20	8
Baz1a	MGLibB_06570	GCAAAACCATTCTGATGTAA	1635	259	1	0	9	1	0	2	2	0	0	0	7	1	0	0	2	0	0	3	0	1	13	0	2	0
Baz1a	MGLibB_06571	AACCCTGTATCTGAATAATA	1279	279	0	3	12	0	20	16	2	5	104	1	0	0	2	0	5	0	2	0	5	0	7	0	0	0
Baz1a	MGLibB_06572	CAACACTGTGAAGCACAAGA	1283	329	86	344	0	0	4	3	11	0	1	11	3	11	0	0	3	0	16	23	4	2	9	4	157	15
Baz1b	KY010383	CATGACCAAATATGCCGTGG	2728	374	1	2	6	0	15	10	43	2	11	10	3	6	0	0	0	0	0	46	0	2	1	1	0	0
Baz1b	KY010385	AGCAGACAGCTTGATTCGAA	1236	216	1	0	1	0	0	0	0	0	0	3	5	6	0	0	0	0	3	0	0	3	0	57	0	1
Baz1b	KY010386	AGATACTTCGATACTTTATT	2110	446	1	3	0	27	9	0	138	1	26	1	2	0	0	9	661	0	33	1	1	2	0	26	24	4
Baz1b	KY010387	CACTTGGAGAAGTCGTTAAA	1355	434	13	358	34	2	147	466	59	3	1061	50	5	104	3	0	2	2	3	5	119	4	15	0	3	0
Baz1b	MGLibA_06573	GACTAGATGACAGAGCGCGT	1055	222	0	13	3	7	9	5	29	31	0	0	0	5	2	0	0	2	3	1	0	1	0	0	0	1
Baz1b	MGLibA_06574	GATCATGACCAAATATGCCG	1227	101	0	0	1	5	0	1	1	0	1	1	9	4	0	0	0	0	0	0	0	0	0	1	0	1
Baz1b	MGLibA_06575	AGAGTCGACAAGCTTCTCTA	1238	234	27	5	1	119	7	4	0	4	204	164	41	5	0	0	4	2	0	0	0	15	10	16	21	0
Baz1b	MGLibB_06573	AAAGATACAGTGAACGCATT	1286	312	1	1	34	5	0	7	76	0	4	19	0	20	1	0	0	2	0	0	2	0	0	0	1	3
Baz1b	MGLibB_06574	GATAGTGAAGATTCATCCTT	1256	404	72	39	71	93	33	3	92	2	5	889	1	121	0	0	2	2	1	5	1	4	9	2	7	167
Baz1b	MGLibB_06575	TGCGTTCACTGTATCTTTCC	7145	2205	77	295	408	491	468	620	263	42	1832	7953	1806	317	752	4626	38	120	231	159	5	185	1278	9	68	76
Baz2a	KY010388	GGGGGACAATACCCGCTCAA	2	204	347	2	115	6	12	338	32302	1159	101	21	19	10	0	4	52	19	753	1	17	7	2	2	0	4
Baz2a	KY010389	CCCGCTCAACGGTATCCTTG	4699	2193	1245	5976	8812	6343	5432	2342	6422	4640	13564	1555	6629	1458	8469	6667	30237	6964	4055	11287	16471	1605	2721	1332	698	3244
Baz2a	KY010390	CACAACACTAATCTTCGAGC	1598	154	0	3	0	13	0	1	0	8	1	54	9	0	0	0	1	0	0	1	0	0	1	1	0	0
Baz2a	KY010391	GACAGTCGTAGGCCACGTTA	2661	930	18	132	3117	251	105	25	51	150	227	393	172	1291	0	6	22	2	13	121	4	27	95	20	48	28
Baz2a	MGLibA_06576	TCTCGATCAGCACGCGCTTT	6454	2006	277	3389	1062	1038	1283	459	256	985	5427	456	815	3861	305	149	9833	9088	48	142	1193	678	1138	108	1654	831
Baz2a	MGLibA_06577	GGGGCTTAACTTCGATTCAC	1214	247	0	31	2	333	5	17	3	0	8	3	0	1	0	1	2	8	4	0	1	2	0	0	0	0
Baz2a	MGLibA_06578	AAGGTTGTCGGTTGCCCCCA	4059	1003	729	38	134	250	10	13	10	20	49	9	293	42	6	4	4	4	6	49	0	7	119	19	88	4
Baz2a	MGLibB_06576	GCTGATCGAGAAGAGACGAC	1219	362	10	153	44	6	275	16	141	5	108	14	1625	1	0	0	0	0	0	14	4	24	4	15	0	16
Baz2a	MGLibB_06577	ACACCAAGAAGTCTCCGTCC	2476	522	56	146	31	16	16	26	3	2	38	806	113	39	2	3	9	25	5	4	26	37	104	6	15	6072
Baz2a	MGLibB_06578	AAGACAGACTCCCCTAAGAC	1151	189	1	135	5	1	22	16	4	3	100	120	59	31	22	0	7	10	50	396	11	3	9	62	1	8
Baz2b	KY010392	GTTCCTCTCAACAGCGATAA	1159	205	0	34	1	4	0	2	0	0	0	0	0	0	5	0	0	0	0	0	2	4	1	1	0	2
Baz2b	KY010393	GGATGTCATTCCTCGTATCA	3010	1132	11	111	32	46	19	22	46	18	58	38	123	44	15	0	36	13	5	9	1	3	36	0	2	50
Baz2b	KY010394	GCACCATCACCCCCATCCGG	3919	789	3	5	8	310	9	11	57	5	12	13	124	63	2	2	7	3	5	6	2	4	1024	1	7	11
Baz2b	KY010395	CCGTTTGGATCGCAATTCAC	4665	1080	44	3934	21	749	34	90	38	750	11	396	52	28	1	8	825	9	22	0	5	77	699	2	9	1
Baz2b	MGLibA_06579	ACGATTCGTCATTCCATTCG	4288	934	100	30	41	353	9	6	21	20	131	57	72	9	7	0	62	5	35	58	6	9	207	10	1	1
Baz2b	MGLibA_06580	TCGTCAGACACCTCGAGTGA	2912	578	24	3	41	9	23	48	25	3	19	10	12	1	1	0	3	3	21	4	1	9	14	6	13	0
Baz2b	MGLibA_06581	GACGAATCGTGATTCTGGGC	1918	161	0	13	22	3	0	0	3	1	0	0	2	20	19615	238	4	34	0	0	1	0	0	0	3	3
Baz2b	MGLibB_06579	GCTGCTAATGCCTTCACTCG	4055	945	46	26	2	7	111	14	13	72	6	22	20	1	26	0	6	0	87	0	8	3	19	11	2	2
Baz2b	MGLibB_06580	AGCCGACAGAATCAAAGATA	542	141	1	0	0	0	1	2	2	11	233	1	0	9	0	0	0	0	0	0	0	0	0	0	0	4
Baz2b	MGLibB_06581	GTATCACCTGACTCAGTGTC	4428	1011	2	39	40	9	13	6	185	2	9	11	13	2	6	7	4	0	54	1	1	27	5	2	0	3
Bcor	KY011056	CACGAGGAACTCCGCTGTTG	3991	1131	10	71	998	38	97	129	11	33	9	56	74	21	417	23	0	107	19	32	0	50	6	21	5	13
Bcor	KY011057	GGATGTAGAGAACTCGCTAT	1630	438	9169	6581	238	25980	9754	26970	38046	21148	246	3606	1223	148	110	61	697	58493	87	6884	264	1872	1422	983	438	1137
Bcor	KY011058	CTGCCAGGCCATCGATCCGA	4943	1870	185	45	109	175	301	109	109	78	31	36	593	724	2	17	778	64	37	535	35	1078	129	5	14	31
Bcor	KY011059	AGGACCCAACCCTCCGTAGC	2331	579	0	10	153	11	21	6	51	3	71	11	14	837	0	0	9	1	4	0	5	3	17	0	9	3
Bcor	MGLibA_06753	GATGAGGCCGAATCCAACGA	1294	897	3059	590	32001	78	125	2214	7708	3534	1723	336	859	7398	37	1	115	24	39	66	10	10	85	124	578	377
Bcor	MGLibA_06754	CTTACGGGCTGCATACGAGC	2296	647	28	148	587	83	5	5	11	18	27	715	5	7	3	0	27	6	112	2	2	4	2045	28	24	3
Bcor	MGLibA_06755	CGACGCTTCAAAAGCCAGGC	1656	373	1	3	1	0	0	26	60	0	27	3	10	0	0	19	0	0	2	2	0	1	1	0	0	0
Bcor	MGLibB_06753	CTGTGAACGTTCCCATACAG	3202	743	3	17	633	8	34	12	3	113	74	12	7	58	0	6	4	1	5	19	0	27	1	473	4	6
Bcor	MGLibB_06754	GAAGCGTCGCCATCATTCAC	3576	847	108	88	162	3288	455	7	57	17	165	33	198	13	25	3	7	126	1	2	81	11	91	2	6	4
Bcor	MGLibB_06755	ACAGCTGGATGAACAGCGAG	869	404	2	1	5	15	1	2	5	5	7	13	14	0	1	1	14	1	0	0	2	10	1	0	0	1
Bmi1	KY011379	ACAAATAGGACAATACTTGC	1010	170	0	15	0	0	0	0	1	7	0	0	1	0	0	0	0	0	0	0	1	0	3	0	0	0
Bmi1	KY011380	ACTGTCTTTATAGCTGCCAA	1781	424	7	16	58	83	12	63	16	1	1527	28	89	87	1	0	5	2	1612	27	9	505	1470	1	5	10
Bmi1	KY011381	TTCTCTCTCTTAGATTGGAT	3479	555	28	709	603	180	54	152	178	18	27	25	391	21	5	7	66	3	33	20	56	51	49	5	15	10
Bmi1	MGLibA_06966	GCAGCTCACCCGTCAGCTGA	3178	724	1388	692	64	160	78	1708	42	151	179	168	37	14436	5	0	9	3	2	5	2	5	12	70	32	9
Bmi1	MGLibA_06967	AACATGTATTGTACGTTACT	2805	823	1	6	35	60	76	1	54	39	32	1	109	94	83	0	4	753	3	2	36	10	4	5	1	3
Bmi1	MGLibA_06968	GCACTTCCTACCTTATGTTC	5231	786	89	37	64	54	40	11	45	53	721	38	153	182	4	4	14	16	7	62	95	25	25	10	4	17
Bmi1	MGLibB_06966	AATGGCTCCAATGAAGACCG	1202	243	1	0	0	2	2	0	0	0	0	0	3	47	0	0	4	0	0	3	0	0	0	0	0	0
Bmi1	MGLibB_06967	TTGAGTTCTTTGATCAGAGC	2084	392	4	21	7	2	4	12	4	2	8	24	14	31	6	0	0	2	1	0	1	1	9	0	2	3
Bmi1	MGLibB_06968	CAAAATTTACCATCAGCTGA	1511	222	1	16	0	143	27	5	0	3	0	3	1	4	1	0	13	0	0	10	0	70	1	0	2	5
Bptf	KY011619	CAAAAGCAGTGGACTTCGAT	1616	239	1	90	32	5	2	1	0	8	0	0	1	4	0	3	9	0	0	1	0	0	5	1	0	56
Bptf	KY011621	TTTGTTCTCCACTGGTCCGT	10916	1198	9	41	1436	96	7	20	45	1	4539	2	86	28	0	4	21	23	3	5	35	3	3	2	2	27
Bptf	KY011622	ACCTGCCCCGACTGCTGCCG	6663	609	0	22	9	18	7	3	16	4	7	0	14	1	44	6	33	0	1	4	0	73	25	0	2	8
Bptf	KY011623	GACCCAGGATTCCGAGGACG	1394	228	0	0	1	5	1	101	51	0	1	9	2	2	0	0	0	4	0	0	0	0	0	0	0	178
Bptf	MGLibA_07131	TACGTTCGACACGAACCTAT	3275	761	6	92	10	44	152	2	23	5	7	8	124	34	18	2	12	559	2	6	4	3	7	1	2	6
Bptf	MGLibA_07132	AATAGGTTCGTGTCGAACGT	2225	99	0	0	0	2	0	0	0	75	0	0	0	0	1	0	0	0	0	0	0	8	0	0	0	0
Bptf	MGLibA_07133	GACCTGACCAACAAGGCTCG	1336	65	0	0	1	0	0	0	4	0	1	0	0	2	0	0	0	0	0	0	0	0	0	0	0	0
Bptf	MGLibB_07131	AGTCTATTAGCTCTGCTAAC	2102	538	0	11	12	363	4	74	4	6	724	60	8	152	0	1	27	14	3	0	0	32	3	2	41	163
Bptf	MGLibB_07132	CTCGTATCATCACCAGACTG	2972	63	0	0	0	0	0	0	0	9	0	0	0	0	0	0	0	0	0	0	0	0	0	0	0	12
Bptf	MGLibB_07133	GGACTCGGAAACTTCTCCAT	2385	246	3	7	33	11	21	26	794	0	0	1	5	3	8	1	1	0	0	17	1	0	46	0	2	111
Braf	KY011624	ACCAACTGATGCGCTGTCTT	3923	1036	83	41	459	427	13	276	26	39	50	163	30	350	1	6	36	3	0	42	2	7	1	0	4	1
Braf	KY011625	AAGATCATCGCAATCAGTTT	2782	831	25	27	205	33	62	12	7	12	5	112	4	6	3	2	28	4	27	13	16	55	54	1	8	5
Braf	KY011627	GGCCGGGTCCGCAGCCGAAG	1861	497	22	89	50	0	88	48	62	254	17	27	76	335	167	2	19	127	10	23	95	916	6	1472	133	20
Braf	MGLibA_07134	TCATAGGTACCCGCAAGATG	2178	502	3	14	1326	914	3	2	310	2	1	13	0	127	0	0	0	5	1	2	1	228	3	0	6	0
Braf	MGLibA_07135	GAGGCCCTATTGGACAAATT	1493	791	5	55	32	21	2	32	1	0	15	25	0	3	0	0	0	0	0	2	0	0	9	3	1	2
Braf	MGLibA_07136	GTTGTTCCGTGATGCATCTG	5765	2219	349	751	345	2742	583	174	109	51	231	7924	309	802	232	80	294	3587	167	233	57	342	313	98	56	215
Braf	MGLibB_07134	GCAAATGATTAAGTTGACAC	1057	509	11	0	0	2	0	1	51	7	4	5	46	4	1	15	0	1	0	0	3	0	0	1	1	1
Braf	MGLibB_07135	TCTTCCTGCCCAACAAACAG	2994	1215	39	10	77	14	15	180	7	22	6	2	105	190	15	4	27	0	2	55	6	17	1	2	12	3
Braf	MGLibB_07136	CTTGCTGGTGTACTCTTCAT	4975	1906	198	4145	213	790	116	1329	394	49	3430	275	3832	204	131	20	326	115	31	32	181	51	60	65	12	402
Brca1	KY011632	AGGTTAAGCGCGTGTCTCAA	3967	458	0	1	66	6	23	8	11	1	66	2	13	1754	0	0	0	2	6	42	2	15	1	4	37	9
Brca1	KY011633	AACCCCAAGGAACTCGTCCA	4489	644	7	5	123	1	8	113	1	1	46	0	179	0	0	0	1	2	0	0	5	2	109	0	8	1
Brca1	KY011634	AAGTTTCAAACGAAGTGGAT	1533	609	37	15	67	13	698	1071	66	58	41	9	39	19	2	1	7	155	3097	1225	56	38	7	1236	267	9
Brca1	KY011635	GGCATTTCCAGGTTCGACCT	6237	675	15	17	139	123	21	22	15	1	399	94	102	21	0	7	194	2	10	3	0	21	37	5	22	2
Brca1	KY011636	GCGTCGATCATCCAGAGCGT	4761	576	9	24	3	3	3	0	7	6	6	22	2	14	0	0	0	159	1	0	0	8	3	2	2	16
Brca1	MGLibA_07143	GGCGTCGATCATCCAGAGCG	3974	874	77	89	1021	263	313	92	758	75	3266	211	81	75	3	4	6	78	68	8	0	7	15	10	7	6
Brca1	MGLibA_07144	GCTACCGGAACCGTGTCAGA	4711	702	6	39	3	11	43	5	18	40	3	1	17	9	0	1	1	0	6	2	6	0	0	2	0	0
Brca1	MGLibA_07145	GTTATCTCATTCTTACACAA	3367	293	0	1	1	2	0	2	192	3	42	1	0	20	120	0	0	3	0	5	105	7	9485	1	55	3
Brca1	MGLibB_07143	ATTGTGAAGGCCCTTTCTTC	5893	1580	405	840	242	228	107	74	306	243	3125	34	180	282	38	26	61	8	22	2	15	10	10	19	104	69
Brca1	MGLibB_07144	TCTGATTTCAGGAGCCTACA	5190	315	0	6	27	13	111	0	1	0	30	1	16	6	0	0	0	0	35	1	1	4	7	0	0	0
Brca1	MGLibB_07145	TCACTTACTTGCAAAATATG	3911	214	0	2	0	2	1	0	6	0	68	34	24	0	0	3	0	0	0	8	0	4	0	0	0	2
Brca2	KY011637	ACAGCTGTGGTTCATAACCG	2255	433	9	8	128	2	133	1	18	34	17	499	0	17	0	0	2	5	27	5	202	12	4	6	1	0
Brca2	KY011638	GAGCCACTTGACGAGACTTT	963	117	0	0	0	0	1	0	8	2	0	0	1	3	0	0	208	0	0	0	15	0	0	5	0	0
Brca2	KY011639	AGATTTCTGGTTCTACGCTT	1804	144	0	2	5	0	0	0	2	0	0	3	30	0	6	0	3	19	0	0	22	2	0	4	1	8
Brca2	KY011640	TGTTTTAAGTACCGCTTCTA	2769	565	67	20	657	7	34	5	6	10	242	41	38	15	1	0	1	1	2	4	0	67	1	10	1	29
Brca2	KY011641	ATGTACCCAATATGCGAGAG	1427	145	1	1	22	8	0	363	16	16	4	3	3	0	6	0	3	0	6	1	0	12	0	10	2	1
Brca2	MGLibA_07146	TAGGACCGATAAGCCTCAAT	2794	646	5	67	2	0	184	5	35	183	1238	3	227	0	0	30	12	4	46	2	97	1	24	5	1	60
Brca2	MGLibA_07147	AAAGCTCCTCAAACCAATTG	658	105	0	0	0	0	0	2	0	54	1	8	92	0	0	8	1851	3	0	1	2	0	0	1	0	0
Brca2	MGLibA_07148	GGACTAGCAACATCTACCAC	1430	309	0	37	1	17	20	0	0	8	27	35	4	0	0	0	3	2	17	5	0	2	1	0	0	0
Brca2	MGLibB_07146	TGTGTGCACCGCAGAGTAAG	3137	543	12	140	9	48	17	6	2	5	5	4	5	297	0	3	0	53	0	0	9	1	3	3	0	0
Brca2	MGLibB_07147	GTACTACAACGAGAAAAGCC	620	88	0	0	0	0	0	0	19	0	4	0	0	0	0	0	0	0	0	0	0	0	0	0	0	0
Brca2	MGLibB_07148	TCACTGAGACAAGATTTCAG	1647	199	0	1	0	9	0	2	0	1	0	2	1	4	0	0	0	1	0	0	0	0	0	0	0	0
Brd1	KY011648	ACGGAGCGCACACGGTCGGC	2278	452	1	1	34	10	0	5	23	4	0	0	1	7	5	0	0	1	0	0	0	0	1	0	0	2
Brd1	KY011649	ATGTTCCTCACACCGTCAAT	4240	755	233	168	72	71	113	219	5	50	45	501	1027	311	13	2	13	1	2	0	38	8	18	8	22	11
Brd1	KY011650	ACAGCACGCAATCCGCAGGG	2431	328	1	11	33	18	4388	0	4	1	133	277	1	23	2	0	0	2	2	8	6	6	6	7	0	28
Brd1	KY011651	TACTCCACAATCCGCACCTT	4369	861	35	163	1121	97	578	109	82	374	26	28	90	70	22	4	291	45	50	41	26	28	58	43	84	18
Brd1	MGLibA_07152	ATTAAATAGGATTGCGAATC	1219	42	0	1	0	4	0	0	31	0	0	0	4	0	0	0	0	0	0	0	1	0	0	0	0	0
Brd1	MGLibA_07153	TGCGCAGCAGCTCAATTAGC	3717	749	11	35	39	295	67	6	0	2	21	22	3	7	1462	18	1	1	3	1	2	10	3	0	2	63
Brd1	MGLibA_07154	TAATTGAGCTGCTGCGCAAG	4051	321	5	11	7	11	4	2	3	2	2	11	3	15	2	8	3	0	2	9	13	12	13	1	0	6
Brd1	MGLibB_07152	TGGACTGGAGCCGCCGCAAC	4775	414	0	21	91	21	1	102	6	867	35	6	639	15	0	1	3	2	3	106	0	4	6	14	3	0
Brd1	MGLibB_07153	AGCGACCCATCGCAGCCCCT	3758	449	9	10	7	21	2255	24	12	1	189	23	394	0	61	11	34	5450	17	16	7130	26	655	1155	30	21
Brd1	MGLibB_07154	GAGCGTAGCAGCACAGTTAG	2061	723	12	232	24	18	10	4	11	38	16	31	1990	96	55	126	244	0	18	11	49	112	12	35	304	157020
Brd2	MGLibA_07155	AGTTGGTTTGTTACCCGTCC	3290	594	3	47	0	29	281	8	2	38	350	17	20	0	22	0	0	0	45	1	6	8	4	13	0	1
Brd2	MGLibA_07156	GGGCACTGGTAATACTGCCC	2688	817	30	901	465	77	22	0	45	1	4	0	0	11	2	0	5	27	1	30	4	3	5	0	2	9
Brd2	MGLibA_07157	CAGTATTACCAGTGCCCATC	4375	738	2004	43	40	168	27	98	97	2739	1141	63	114	24	51	205	1	6	35	4	4	13	851	11	6	81
Brd2	MGLibB_07155	CACCGATGATATTGTCCTAA	3500	657	10	14	2	43	78	23	53	18	0	11	71	16	4	1	135	1	41	1	5	66	1	0	646	10
Brd2	MGLibB_07156	AGTAGCATCCATGCCACAAG	958	69	0	0	0	0	0	0	0	0	0	0	0	0	0	0	0	0	0	0	0	0	0	0	0	0
Brd2	MGLibB_07157	GCAGGGGCCAGTTGTAAAGC	1333	172	1	0	2	0	224	0	20	0	0	20	5	106	0	0	0	0	0	0	0	0	0	3	0	35
Brd3	KY011652	CTTGTAAAAGGGCCACGCAT	2283	395	53	3	7	18	17	63	1463	11	22	3	1	1	1751	14	52	0	3	181	7	129	1	70	1204	368
Brd3	KY011653	CCTTTTTACCCGCGTGCTGT	6025	1326	18	40	36	21	66	28	3305	52	224	249	116	24	4	14	35	11	3	1	6	39	7	7	35	12
Brd3	KY011654	GCCAGTGGACGCGGAGGCGC	5194	2296	19	430	376	46	114	49	336	110	345	15	93	76	21	2	12	26	16	374	32	1175	24	243	5	12
Brd3	KY011655	GGGACGATGGGTGTCGCAGG	1649	693	5	55	37	63	115	87	11	34	8	21	77	42	7	0	3	2	1	65	102	0	13	2	0	2
Brd3	KY011656	ACAGGGGTAGCGGCAATGAC	2054	704	101	27	2	38	2	318	53	2	17	15	34	4	5	1	5	0	9	15	18	2	7	3	1	4
Brd3	MGLibA_07158	CACGGGGATCCCGGCAGTCC	5002	1399	104	560	2445	258	493	51	170	183	124	358	309	869	4	34	1187	67	220	259	44	293	77	64	663	102
Brd3	MGLibA_07159	AGTCTTTCGCCCGGGCTTGC	2838	443	0	30	2	2	10	1	23	1	2	3	58	3	1	0	18	0	0	65	3	0	152	0	0	4
Brd3	MGLibA_07160	TCCCACACCGCCTGTAGTCA	7105	1975	634	796	1371	158	1191	756	654	310	3111	415	2226	772	90	121	9405	1856	12	239	178	280	690	1076	1410	226
Brd3	MGLibB_07158	ACTATTGCCCCCTGCTCCAA	2874	721	2710	1630	260	2672	37	20	11	1	17	2	5	20	5	1	0	2	3	2	4	4	3	2	1	36
Brd3	MGLibB_07159	ACACGGTGGGGGGTATGTTC	4159	1128	103	8898	2444	457	219	499	4836	1061	150	178	2568	221	138	110	75	7454	888	13	148	336	329	239	26	509
Brd3	MGLibB_07160	CACAGATGATATAGTGCTAA	841	180	0	353	0	0	12	0	28	1	1	2	9	1	2	0	4	0	0	0	0	1	4	5	3	0
Brd4	KY011657	GGACCCAGCTTGGCGGTCTT	2564	1125	7956	11228	21803	8727	11305	11852	21415	7844	13738	16861	17036	20399	17419	24047	11145	3536	3209	13639	27151	8942	7121	7857	4198	6534
Brd4	KY011658	GAGCCCAAGACCGCCAAGCT	1754	75	0	0	0	5	4005	0	1	3	0	1	0	1	47	2	2	0	0	0	0	0	0	0	0	23
Brd4	KY011659	CTGGGGGGTGGTCGCAATGA	2137	270	1	0	0	28	12	0	7	6	1151	8	0	0	0	0	9	11	1	0	0	10	0	1	0	0
Brd4	KY011661	TATGGAAACACCAGTTTGCG	2156	64	0	0	0	0	0	0	0	0	2	0	0	0	0	0	1	0	0	1	0	1	0	0	0	0
Brd4	MGLibA_07161	GGGCCTGCGTTGTAGACATT	2324	367	2	2	207	1	1	5	18	1	0	2	14	3	80	3	1	0	0	0	0	0	0	0	0	0
Brd4	MGLibA_07162	GCTGGAAAGGCCACGCAAAC	1516	378	0	2	1	235	0	1	0	0	1	1	14	106	0	0	0	0	2	0	1	2	12	0	3	0
Brd4	MGLibA_07163	GGGGTGGTCGCAATGATGGG	1772	187	61	0	0	7	314	22	0	1	2	665	1	0	0	0	27	0	0	132	6	0	0	1	0	1
Brd4	MGLibB_07161	AACTGAGATCATGATAGTCC	1892	129	192	19	0	29	0	0	0	31	5	362	30	1	1	0	0	0	0	2	9	1	3	2	0	121
Brd4	MGLibB_07162	ACCGGTGAAGGAGTCTGAAG	1312	186	0	1	0	1	8	4	0	1	0	0	12	0	0	0	3	0	0	0	2	1	0	0	1	0
Brd4	MGLibB_07163	ATTAAGACGATGTCATCTCC	3035	76	0	0	0	2	0	0	1	2	2	0	0	1	0	0	0	0	0	0	0	0	0	0	1	4
Brd7	KY011662	GCAGATTGAGCGCGTTGTCC	5290	1080	49	1031	52	1726	301	103	558	132	146	27	156	7	64	19	2400	7	61	43	251	272	68	54	51	431
Brd7	KY011663	ACCTTTTATTGTCCTTAGCG	3391	554	56	1319	8	0	141	22	0	0	36	34	23	10	0	0	1	179	9	165	20853	70	108	40	3	2
Brd7	KY011664	CGGCTGCTGGCAGCGCGAGA	850	61	0	0	0	1	0	0	0	0	0	0	0	2	0	0	0	0	0	0	0	0	0	0	0	0
Brd7	KY011666	GTGACGGATTTTATTGCGCC	4864	435	2	87	27	7	2	8	44	1	6	0	37	0	4	0	0	2	8	0	0	12	4	1	26	1
Brd7	MGLibA_07165	CCTCGCTCCCCCCGACTTTG	8419	1934	2057	679	73	36	288	133	164	27	82	25	44	233	30	6	12	18	12	4	2	209	41	6	12	179
Brd7	MGLibA_07166	CCTCAAAGTCGGGGGGAGCG	1512	353	12	4	157	20	0	45	10	70	15	1	4	178	0	0	0	0	0	11	0	0	773	13	0	291
Brd7	MGLibB_07164	ATCTTATAGGGACATGACAC	1837	337	4	0	1	0	4	0	2	3	0	2	1	0	0	0	4	0	6	3	0	3	0	1	0	0
Brd7	MGLibB_07165	TCGAGACCGTGCAGAGAATG	2891	586	679	16	13	2	37	3	258	17	4	6	9	2	0	27	119	1	4	0	0	4	36	0	2	0
Brd7	MGLibB_07166	CCAGTCCATAGAAGAACTAA	738	208	14	5	388	2010	3595	1446	152	23	8608	4	52	315	15	186	357	21	80	28	258	23	15	5	120	42
Brd8	KY011667	GGGGTACTCGGCAAAGTCCC	1171	194	0	0	35	1	2	1	2	1	0	0	3	1	0	0	1	6	0	0	0	4	7	1	2	0
Brd8	KY011668	ATCACAGTCGGTAACCTTCG	2501	263	1	0	2	260	94	1	3	429	1	4	1	7	10	3	264	0	4	0	0	0	1	1	0	0
Brd8	KY011669	ACAGTCGGTAACCTTCGAGG	2265	142	0	2	1	10	2	118	1	851	0	2	4	0	1	1	22	0	0	1	5	1	10	0	0	6
Brd8	KY011670	CTCACCCTGGTACGCAGCAT	4772	1390	3970	12128	1844	6784	9886	7333	5232	10952	18119	19330	19929	29310	6184	14738	6055	4650	1066	4336	222	42938	9976	27154	5906	14899
Brd8	KY011671	GTTTTCCACAGACGGAAACG	981	23	0	0	0	0	0	0	0	0	0	0	0	0	0	0	0	0	0	0	0	0	0	0	0	1
Brd8	MGLibA_07167	ATCAAGCCCTTTGCAGAACC	3223	409	246	0	0	19	2	18	42	0	13	9	2	0	4	2	2	1	1	1	64	34	3	1	5	3
Brd8	MGLibA_07168	GAGCACAAGCTGCTGAGTAC	1922	326	9	10	2	16	4	0	14	2	25	11	6	0	0	1	0	0	0	2	0	0	0	0	1	0
Brd8	MGLibA_07169	ATGCTAAACACAACTTCTCT	1651	110	2	0	0	60	0	0	0	0	1	0	0	2	0	0	0	0	0	0	1	0	49	0	0	3
Brd8	MGLibB_07167	AGAACTGAAGAAAGTCATAA	428	10	0	0	0	2	0	0	0	0	0	0	0	0	0	0	0	0	0	0	0	0	0	0	0	0
Brd8	MGLibB_07168	AGGCCGGCCAGGTTCTGCAA	2127	176	0	0	2	0	4	0	11	0	0	0	5	2	0	0	0	0	2	3	0	0	0	0	0	0
Brd8	MGLibB_07169	GTTTAGCATCTTCTGTCATG	5560	1183	21	43	160	205	95	15	43	7	16	16	46	107	4	4	0	14	0	14	2	12	2	4	3	0
Brd9	KY011672	CGATCGCTCAGACCACGAAC	1983	302	4	4	28	1	5	0	37	10	14	6	16	66	1	3	9	2	1	2	1	0	2	2	0	0
Brd9	KY011673	CTTGCCTGGCTGTGTTCGGC	3954	496	7	38	8	15	7	1169	97	14	2	14	21	2399	22	1	7	33	8	5	20	14	3111	8	1	69
Brd9	KY011674	GGAGCAATTGCATCCGTAAC	1570	257	15	0	1	99	2	1	23	1	0	0	10	635	0	0	0	2	0	0	10	0	0	0	1	2
Brd9	KY011675	GCCAAGAAGATCCTGCACGC	3362	903	13	25	30	51	89	14	39	10	47	82	78	159	2	1	34	4	1	1	0	3	7	2	11	1
Brd9	KY011676	TCATCTTAAAGCCCGCGTGC	4564	560	7	3	7	8	51	4	113	1	0	0	11	5	0	2	0	0	0	0	0	3	4	1	0	0
Brd9	MGLibA_07170	TGAGCGATCGTCGTAGTAGC	3229	681	33	65	13	1	23	29	9	1	27	19	5	16	0	0	8	2	1	0	0	0	0	4	0	147
Brd9	MGLibA_07171	ACGATCGCTCAGACCACGAA	1376	437	19	45	0	122	12	12	38	315	8	736	162	471	13	5	267	14	13	12	1	2	548	2	11	5636
Brd9	MGLibA_07172	GAGGCTGATGCTTTCGACCC	2788	347	5	0	12	353	118	0	781	18	18	4	0	6	491	2	0	1	1	0	0	1	23	0	1	0
Brd9	MGLibB_07170	GAAGGAACACTGCGACTCAG	1623	228	0	2	229	16	0	3	0	0	7	2	5	10	1	0	0	4	0	0	0	4	0	1	0	0
Brd9	MGLibB_07171	TTCATCGTGCCAAAGTCCAT	3972	656	34	76	18	51	6	930	23	37	50	28	6	74	0	9	2	2	2	2	0	32	3	0	4	1
Brd9	MGLibB_07172	ACGAGAGCACACCTATCCAG	2159	216	3	0	3	0	5	0	1	0	0	0	2	0	1	5	0	0	0	0	0	0	0	0	0	2
Brdt	KY011677	TTGGCCTTTCCAACAGCCGG	2391	257	12	105	0	0	7	11	48	4	0	1	2	9	213	13	42	2	0	0	0	59	2	12	6	2563
Brdt	KY011678	AGAGAAGCCGTGCTTCCACA	1201	288	0	0	1	10	10	1	0	1	0	0	1	9	1	4	3	0	1	2	1	2	4	0	0	0
Brdt	KY011679	GCGTCCACCGGCTGTTGGAA	1614	408	49	7	76	23	44	5	3	13	34	8	11	6	2	0	7	1	22	0	0	0	2	1	1	1
Brdt	KY011680	TCACGGCGTCCACCGGCTGT	5484	1789	402	199	954	253	446	2753	431	487	255	182	63	508	21	21	178	9	8	49	34	84	182	583	1062	569
Brdt	KY011681	TTTAGTTTCACGGCGTCCAC	5057	1017	61	26	43	11	35	36	149	6	32	97	65	26	248	69	5	8	5	223	13	9	245	7	10	3
Brdt	MGLibA_07173	AAAGACATTCTCTGCCGCTT	2385	312	147	2	86	3	0	0	1	14	3	1	7	0	0	0	1	0	34	0	2	1	3	0	4	0
Brdt	MGLibA_07174	GATCTGTGACTCGCAGTCTC	3200	451	17	370	242	171	298	886	193	51	16	15	481	26	42	0	33	245	43	47	12	75	37	14	109	15
Brdt	MGLibA_07175	ACAATAGCTGTTTGTCGACT	1949	337	0	87	5	115	2	0	5	0	149	11	4	34	2	0	0	2	0	0	2	4	2	0	0	0
Brdt	MGLibB_07173	CTCTTGGCCTTTCCAACAGC	2245	418	3	80	6	178	1	0	102	0	8	7	94	10	0	16	26	0	140	13	0	9	10	1	4	2
Brdt	MGLibB_07174	GCCACAAGAAGAGCAAGTTG	1700	422	10	1	23	9	0	65	31	6	12	3	2	5	5	0	4	4	1	3	0	0	0	0	2	0
Brdt	MGLibB_07175	AAACTGCTACTTATACAACA	951	169	0	0	0	0	0	2	2	11381	20	0	0	4	1	0	1	0	0	0	0	6	0	0	0	0
Brpf1	KY011727	AGATGCTGATTCGGTGGACA	1310	168	8	0	0	1	9	0	6	41	2	0	1	0	0	0	0	0	0	1	1	0	0	0	2	2
Brpf1	KY011728	TGGGCCGGGGTGGTGCGTCA	3338	1149	9	151	60	58	3663	64	16	155	68	3887	125	598	1440	1461	52340	117	12	129	19	128	23	256	18	11
Brpf1	KY011729	GTGGTGGTCTTACCGGTAGT	2471	638	229	264	6	202	20	577	129	30	26	5	30	36	0	1	1	90	0	4	7	2	4	1	10	2
Brpf1	KY011730	GGCTGTCTTGCGGACGCTAA	1979	616	89	2556	27	1491	26	2597	429	195	75	13	28	19	2879	1010	9	6	187	350	78	545	3712	125	160	3
Brpf1	KY011731	TTTGTAGGCGCCTGAGTAGT	4691	715	1	53	36	60	24	3	41	26	97	1	52	5	1	0	1	19	1	2	0	12	68	0	0	26
Brpf1	MGLibA_07221	TGTCTTGCGGACGCTAAAGG	3064	655	3	20	8	3	61	3	10	6	13	4	2	5	0	1	0	0	2	0	2	4	0	2	0	0
Brpf1	MGLibA_07222	CCAACCGCCTGACCATCCAG	5172	1441	59	73	15	108	25	48	5	34	246	59	49	91	213	3	11	1	9	53	128	14	7	4	21	56
Brpf1	MGLibA_07223	CTGAAACGACAATCACGGAA	730	95	0	0	0	0	0	0	0	0	0	0	0	7	0	0	0	0	0	0	0	0	0	0	0	0
Brpf1	MGLibB_07221	TTGGCACCTGTCTCCCGCAC	8548	2301	31	242	126	26	41	104	42	1188	133	40	303	125	32	24	53	14	12	15	10	149	27	61	53	44
Brpf1	MGLibB_07222	CATCCTCCTCCGAAAAACCT	2223	265	8	7	0	1	2	0	1	2	3	1	2	3	0	0	5	0	0	0	1	0	1	0	0	0
Brpf1	MGLibB_07223	CGAGCCGGTCCCTCTGTCTG	7981	1474	23	8	134	32	4	31	28	1	9	126	101	2324	14	9	197	43	7	11	1530	32	12	30	271	0
Brpf3	KY011732	TCGCAAGACTGCGTATTGTG	5382	1167	45	1896	40	210	91	292	150	68	62	2639	76	1690	194	39	212	2982	130	25	15	70	1111	14	4	148
Brpf3	KY011733	GGAGGTACCGGACGCATGCT	1470	653	341	1553	113	570	1850	318	1988	131	63	232	405	205	5	65	136	13	82	69	23	45	23	169	81	5272
Brpf3	KY011734	TCCAGATGGCGCAGACTACG	3569	894	72	2	71	5	11	26	12	5	3	7	4	1182	0	0	1	8	0	2	2	50	18	1	4	4
Brpf3	MGLibA_07224	TGATCGAGCTCATCCGCAAA	2507	367	11	55	0	54	5	127	2	23	0	9	2	0	0	2	15	20	3	1	0	1	66	0	2	0
Brpf3	MGLibA_07225	GGAACGGTGTCCCCCTCATC	3461	1296	49	6229	154	353	58	252	120	55	2540	175	574	100	12	15	34	111	7	51	167	1449	75	20	336	60
Brpf3	MGLibA_07226	GTCCTCAACAGGACCGTAAA	324	32	0	0	0	0	0	0	0	0	0	0	0	0	0	0	0	0	0	0	0	0	0	0	0	0
Brpf3	MGLibB_07224	CTTGCCCGAATCACCCAGAT	3061	713	55	51	12479	7	58	1	7	75	60	17	35	44	14	0	140	25	5	0	2	7	0	2	41	1
Brpf3	MGLibB_07225	ACCGAGCAGCTGTCCGCCTC	7278	1411	28	45	47	158	203	49	525	14	325	334	342	187	6	0	7	4	2	13	7	51	7	10	9	22
Brpf3	MGLibB_07226	GCAGAAACTTCGCCATGACC	3790	849	30	25	46	39	2435	7	21	0	264	4	11	43	2	1	17	7	1	3	4	1	9	5	10	4
Brwd1	KY011751	CCCTCCCAGTCCAACCTCTT	6757	1588	205	78	589	1881	1614	6612	1364	253	130	1207	70	1280	5341	8251	15	66	229	9	4711	4935	1599	2250	4329	81
Brwd1	KY011752	CAACAGGAGCTACGAGGAAT	1223	202	0	0	0	2	5	0	0	1	0	1	0	4	0	0	0	0	0	0	2	2	0	4	0	0
Brwd1	KY011753	CGAGCACAACAGGAGCTACG	1425	433	33	8	6	34	184	0	35	1	2	3	2	1	2	0	1	5	4	3	1	21	0	1	3	0
Brwd1	MGLibA_07236	ACCGGACGTCGGGCCGGCGA	2032	402	2	2	41	47	145	5	15	26	2	4	4	1	0	0	3	0	0	1	2	2	0	2	0	1
Brwd1	MGLibA_07237	CGCCATGGCGGAGCCTTCGC	4035	979	4	27	45	4	8	39	51	13	31	10	4	8	3	0	0	1	4	1	5	16	1	0	7	4
Brwd1	MGLibA_07238	CGGCACTCACCTGCGCCGCT	1761	712	4	13	2091	41	0	24	7	2	2	45	27	2	12	2	6	943	7	2513	54	836	243	2	11	380
Brwd1	MGLibB_07236	ATCGCCCGCTACCTCTCAGC	5353	556	4	1	9	7	28	2	24	9	60	7	1	1	0	0	41	1	1	0	1	0	11	2	0	0
Brwd1	MGLibB_07237	CATTCCAGCTGTTGCCGAAG	2280	437	0	2	153	5	5	6	6	2	0	1	4	0	0	0	2	0	0	20	1	0	54	1	2	0
Brwd1	MGLibB_07238	GGGAGGGCAACGAGCACAAC	1021	274	0	22	1	0	0	1	9	0	0	0	5	3	19	3	0	1	0	0	0	20	1	1	1	0
Brwd3	KY011756	CAATTTGGCCACTACGCCGA	3416	718	67	116	65	283	93	227	36	76	509	493	295	154	42	0	86	13	2	39	8	5	8	4	9	0
Brwd3	KY011757	TGAGGGGCCGATAATCGGTA	1989	755	1099	89	105	467	81	11	220	657	8	368	1429	86	218	33	7	188	24	48	101	156	276	1	13	78
Brwd3	KY011758	ACTACATCCGGTTAATTGCC	2443	479	7	0	7	44	1219	183	7	2	5	2	8	11	255	5	18	5	6	103	2	98	1330	2	471	29
Brwd3	KY011759	TAGCCTTTGATCGAAGCGGG	1717	711	5	67	51	78	5	15	42	29	1387	39	23	40	117	8	0	0	218	43	81	10	43	7	4	7
Brwd3	MGLibA_07239	AGCTGTATTACCTGATCGCA	2902	596	5	8	18	1	0	11	4	22	5	4	8	48	0	1	2	0	39	198	3	2	4	2	946	8
Brwd3	MGLibA_07240	TGATTCCGCGCCGCTTAGAC	7742	1553	11	66	10	128	27	92	58	13	64	30	44	67	9	17	0	4	168	35	427	4	333	6	2	0
Brwd3	MGLibA_07241	CACCTGAGCGGATTTGTTAC	2374	524	18	2	0	4	2	19	18	2	8	2	3	2	40	5	0	0	2	0	0	5	13	2	1	13
Brwd3	MGLibB_07239	AGAGCACCGAAGAAGCTTCG	788	151	0	0	0	0	0	0	0	0	1	0	0	1	0	0	0	0	0	0	0	0	0	0	0	0
Brwd3	MGLibB_07240	CCTAGTAATGTCTGTACCCC	5621	1205	178	358	547	505	303	17	4505	1254	19	327	98	356	10	1097	1245	49	39	13	127	750	78	22	2288	72
Brwd3	MGLibB_07241	GCAAGAGCTCGAAGAGCATC	1061	521	122	3	480	65	16	2	4	7	595	51	9	130	1	0	0	1	3	0	22	47	5	2	11	1
Btg3	KY011892	CATCCAAAGGTCAGGCCTAC	2861	945	111	1886	466	936	2126	231	13156	1745	9955	3398	3295	86	194	183	607	142	108	301	230	217	370	162	88	3423
Btg3	MGLibA_07329	GCGGGTCTTACCTGGTACAC	2691	733	25	45	981	2940	68	22	82	91	388	107	426	35	59	21	5	7	1	69	927	10	131	84	39	20
Btg3	MGLibA_07330	AACACCAAGCCCCGTGTACC	3892	875	10	48	20	78	217	18	39	50	23	23	97	17	6	1	15	12	21	26	23	52	4	12	10	7
Btg3	MGLibA_07331	TTACCTGTAGGCCTGACCTT	4656	1084	13	47	295	141	120	62	362	215	156	10	243	46	6	1	62	6	11	93	14	20	30	467	6	3
Btg3	MGLibB_07329	CACCGGCAGCACACCTCACA	5397	1591	26768	190	488	222	78	709	112	69	400	36	242	515	34	5	616	6	275	43	27	18	2612	42	19	33
Btg3	MGLibB_07330	AAAAATGAAGAACGAAATTG	613	62	8	0	0	2	1	1	0	6	8	0	2	0	0	0	1	2	0	0	0	0	3	0	0	0
Btg3	MGLibB_07331	CTGCATCTTGTACAGCGACC	2560	433	5	159	14	53	184	2	11	5	423	7	21	7659	4	0	0	5	9	12	0	4	0	0	2	7
Btla	KY011903	AACAATCTGTGTACCCCTTG	3591	1678	1148	589	1879	6478	14982	2483	3384	3614	516	1664	12164	9684	1518	11047	4217	2366	2167	6756	2323	1170	3060	2851	303	506
Btla	KY011904	GCCCTCAGCTATACACTAGT	2135	1975	669	630	2234	980	1080	576	1004	233	468	343	635	946	253	253	1001	159	144	315	865	212	792	57	713	69
Btla	KY011905	CCCTCAGCTATACACTAGTT	2336	995	19	77	540	86	35	296	171	22	114	5	494	229	3	0	4	0	1	1	5	46	663	4	1	1
Btla	KY011906	GGAAGAAAATCAATCAGTTC	819	180	1	0	3	0	9	0	1	0	0	2	0	0	0	0	1	0	0	0	0	1	0	1	0	0
Btla	MGLibA_07338	CAGTGCAACTTACTATTACG	2605	723	23	20	10	8	1	4	3	10	14	43	6	2	0	0	2	0	6	0	6	2	9	3	4	0
Btla	MGLibA_07339	CTCGTAATAGTAAGTTGCAC	2101	611	22	140	43	55	11	54	145	12	12	12	66	810	84	4	365	9	6	0	1	25	225	71	7	11
Btla	MGLibA_07340	AAGAATTCCCTAAATAACCG	1709	112	4	0	0	0	0	0	1	0	0	0	0	0	0	0	0	0	0	0	0	0	0	0	0	0
Btla	MGLibB_07338	CCAGATGCCACCAATGCCTC	3840	1398	175	67	723	1239	40	155	1117	586	1586	145	55	262	38	14	50	36	21	5	47	164	9	190	4	614
Btla	MGLibB_07339	TAAAGCAGCCAAGTCCTGCC	3766	1151	19	23	814	29	28	148	92	107	697	205	185	44	27	104	191	143	20	65	19	132	26	2	6	20
Btla	MGLibB_07340	TCTTAGTAGCTTTCTCACAA	2463	456	7	36	4	79	32	1	6	100	5	113	0	15	0	0	8	39	0	0	0	3	5	3	21	1
C920025E04Rik	MGLibA_07599	ATTTCCACACCGTCGTATCC	5001	694	614	48	150	436	86	15	34	22	62	35	120	43	6	6	49	11	377	2	61	32	280	11	119	35
C920025E04Rik	MGLibA_07600	TGGTCGCGGTCCAGGAGCGC	5750	1277	733	639	467	483	749	157	756	45	461	583	435	1675	43	10	1276	50	17	59	186	1019	96	256	92	88
C920025E04Rik	MGLibA_07601	GAGGCCGGGCCGGGATACGA	1973	282	0	1	0	7	1	0	63	0	0	0	0	5	0	0	0	1	0	0	23	3	2	0	0	0
C920025E04Rik	MGLibB_07599	GCTCCATACATACCTACAGC	3703	493	4	8	2	15	228	1037	169	3	37	21	7	256	15	1850	20	4	221	20	215	2694	11	3	16	2542
C920025E04Rik	MGLibB_07600	AACAGCAATGATTACCATGT	2768	970	3	2	2	3	8	10	1	2	9	0	6	8	99	7	1	0	10	0	25	6	56	2	4	1
C920025E04Rik	MGLibB_07601	ACATGGAGTTTGTGGAGACC	2763	118	7	0	0	0	0	2	0	0	0	0	0	0	0	0	2	161	0	0	0	0	4	3	0	0
Caprin2	KY012859	CAAATGGCCAAGTCCTGACG	2800	723	14	23	54	236	216	58	2578	18	37	40	32	132	0	0	3	8	5	13	7	5	82	13	4	1
Caprin2	KY012860	CCTGGGAAGCAGATTATGCT	1870	319	0	0	139	0	14	0	0	0	23	1	0	132	893	15	0	2	1	0	8	1531	0	12	0	0
Caprin2	KY012861	ACAAGTTCCGTAAGAGATTC	1242	189	4	15	19	6	0	8	3	2	647	4	3	88	1	47	2	0	9	1	0	82	2	0	0	1
Caprin2	KY012863	TAGGAACATCGAGAAGAAGA	741	139	0	2	0	0	1	1	3	0	3	0	3	0	0	4	0	0	1	0	0	2	5	1	0	0
Caprin2	MGLibA_07968	CAACTACTTACCAACTGGTC	2697	573	25	188	1	3	7	18	3	27	0	11	1	10	5	0	28	1	1	12	4	2	0	0	2	1
Caprin2	MGLibA_07969	TATAAAGATCGCCTTAAAAA	503	70	4	2	1	50	5	0	0	0	11	0	32	2	0	0	2	28	0	0	0	0	0	0	0	1
Caprin2	MGLibA_07970	ACAAGGATGACTGCTCCATC	3148	743	12	47	127	19	736	32	19	15	126	13	339	9	4	5	3	0	0	26	178	13	5	490	1	33
Caprin2	MGLibB_07968	TCAGCATATGCTCCCTTCTC	9058	2359	410	269	902	382	211	122	130	542	108	263	212	3119	351	8	430	60	56	266	8	19	40	9	33	42
Caprin2	MGLibB_07969	GCTGCTGAAAGCGCAGAAAA	469	155	0	0	0	10	4	16	0	0	0	0	8	0	0	0	1	0	0	11	5	0	0	0	0	0
Caprin2	MGLibB_07970	AGCAGTCATCCTTGTACTTT	3586	1077	32	580	51	76	39	11	329	104	276	105	0	8	2	2	2	1	0	0	21	1	8	7	2	87
Carm1	KY013004	GCAGCAGGCGCTGCGCCTTG	2688	502	0	0	1	148	0	0	0	40	80	0	1	0	0	0	0	0	0	1	0	0	1	3	2	0
Carm1	KY013005	GGTGCGCGCCGGACCAGACG	1715	84	0	0	0	0	0	0	0	3	0	1	0	0	0	0	0	0	0	0	0	0	0	0	0	0
Carm1	KY013006	CGCGCCGGACCAGACGCGGC	1852	318	0	0	4	688	0	0	5	0	0	0	0	0	0	0	0	2	0	0	0	4	0	1	0	3
Carm1	KY013007	GGTTCTGCAGGATCGCACGC	2498	307	0	1	43	0	0	11	23	0	64	1	3	5	0	0	0	5	10	4	0	4	1	3	1	0
Carm1	MGLibA_08061	CGTTCGCGTCGCCGATAGTG	2372	123	38	1	90	89	62	0	35	13	1	15	1	36	0	0	0	0	0	0	1	0	0	0	1	1
Carm1	MGLibA_08062	CTCACTATCGGCGACGCGAA	2178	141	4	0	0	0	47	2	6	1	0	0	0	0	0	1	0	0	0	0	0	0	0	1	1	0
Carm1	MGLibA_08063	CTGCAGGATCGCACGCTGGT	1765	205	0	7	1	250	0	0	7	49	0	0	0	0	0	0	2	3	0	0	0	0	0	0	1	0
Carm1	MGLibB_08061	TGAGGACGCTGTTGCAGCCC	4353	397	0	0	0	1	1	104	14	7	2	5	1	12	0	5	1	0	0	0	0	13	22	12	0	2
Carm1	MGLibB_08062	CCTTGTCCTTGAAGTCCGTG	7248	1028	14	4	40	22	20	16	10	0	38	8	158	7	32	3	11	2	3	5	7	6	13	10	0	3
Carm1	MGLibB_08063	ATCCAGTTTGCCACACCCCA	4008	364	1	0	62	7	6	1	4	0	65	5	0	1	1	0	3	0	0	0	0	1	5	0	0	0
Cbx1	KY013284	AGGTGGAATATCTTCTAAAG	631	158	0	9	0	3	3	0	0	0	0	1	23	10	0	0	5	0	0	6	0	2	57	0	0	0
Cbx1	KY013285	GAATATCTTCTAAAGTGGAA	393	34	1	0	0	0	0	0	0	0	0	6	1	9	0	0	0	0	0	0	0	0	0	1	39	0
Cbx1	KY013286	CATGAGACAGATAAGTCAGA	1075	196	0	90	0	5	0	6	10	0	112	0	1	0	0	6	0	0	3	74	1	0	355	0	0	0
Cbx1	KY013287	GAAACTCAGCAATAAGGTCA	1379	288	1	1206	27	8	4	5	61	99	253	0	0	63	5	0	0	12	2	7	1	88	3	3	0	2
Cbx1	MGLibA_08238	GTAGCTCCAATAATCCGCTC	1848	434	64	0	1	8	3	25	9	0	2	1	1	4	1	1	21	3	0	0	0	9	3	3	0	0
Cbx1	MGLibA_08239	TTACAGTCAGAAAAGCCACG	1412	538	33	191	7	35	20	14	7	4	130	17	192	7	4	38	2	5	6	5	0	37	3	6	8	8
Cbx1	MGLibA_08240	AACCTGTGGGCACTTGACAT	3267	585	60	189	20	231	59	5	34	64	32	54	96	418	19	3	16	3	108	29	23	10	3	24	10	6
Cbx1	MGLibB_08238	GTTTCAGTGAGGACAACACT	1643	253	8	0	0	1	10	1	5	0	15	1	4	1	0	6	2	2	1	36	5	0	18	4	2	0
Cbx1	MGLibB_08239	AGCCAATGTCAAGTGCCCAC	2564	383	2	22	33	8	10	17	15	41	0	0	110	7	1943	26	3	9	0	3	1	0	8	1	21	1
Cbx1	MGLibB_08240	TGGTGGAAAAAGTTCTTGAT	1428	324	95	54	4818	5	5	0	0	2	6	2	12	5	0	17	2	0	378	0	2	8	0	15	0	3
Cbx2	KY013289	CTCCTCTTCCTCGGACGAAG	2798	469	0	14	71	2	2	11	2	3	2	0	2	85	2	20	1	1	1	0	0	1	0	0	0	39
Cbx2	KY013290	GATGGGTTTCACGGCCCCGG	2485	410	30	8	49	15	9	30	139	9	147	71	39	6	2	0	3	0	0	20	12	15	1	3	2	2
Cbx2	MGLibA_08241	GCGGTTCATGTAGTGTACGA	2539	604	7	104	42	61	311	9	62	0	27	249	29	27	6	5	41	0	6	4	4	18	9	3	39	58
Cbx2	MGLibA_08242	TTTAACGGTGTCCCGCTTGA	2586	616	31	291	437	108	79	27	671	35	95	282	1719	2389	3	11	1	1	6	2	9	9	9	0	9	5
Cbx2	MGLibA_08243	ACCAGCCGCGCCACTTGACC	4981	846	148	26	10	2853	48	83	12	22	31	378	30	2951	277	6	20	4	6	405	2	940	86	4	1	134
Cbx2	MGLibB_08241	TCACCTTGAGCTTGGAGCGC	5287	969	23	790	11	65	26	1083	3	9	329	6468	1686	39	243	26	70	1698	10	47	139	31198	23763	21	921	111
Cbx2	MGLibB_08242	GAGTTCTCACTTCTTCTGGA	1618	191	0	0	0	0	0	0	1	0	0	1	2	0	0	1	0	0	0	0	0	19	15	0	0	2
Cbx2	MGLibB_08243	GCAGGGCAAGCTGGAGTACC	3168	817	1	2	1	14	2	782	16	8	1912	44	3	68	26	2866	8	8	4	4	54	15	1266	8	28	6
Cbx3	MGLibA_08244	AACACAGTGCTGATAATACT	1210	99	0	0	1	0	3	1	0	0	0	0	0	9	0	1	1	0	0	0	0	0	0	0	0	1
Cbx3	MGLibA_08245	GTATACAGGCTGACAAACCA	1441	781	18	50	34	68	59	13	254	75	51	24	179	17	1338	195	85	43	18	127	3	81	44	39	11	17
Cbx3	MGLibA_08246	CAACAGGAAGGACTCGGACG	1827	345	7	15	6	0	39	5	9	8	203	10	2	9	2	1	0	2	2	5	28	4	3	4	3	0
Cbx3	MGLibB_08244	TAACTCTCCGCTGCTGTCTG	9593	2800	397	286	148	1285	2514	1225	107	2776	632	91	3393	948	58	3636	78	1629	369	268	2693	6063	607	41	36	160
Cbx3	MGLibB_08245	CTGTGAACCCCTTCCACTTC	4029	721	0	14	2	9	14	3	7	3	152	9	42	4	1	2	14	2772	2	6	3	692	43	10	1	0
Cbx3	MGLibB_08246	AAAATGGGAAAGAAACAAAA	97	17	0	0	0	0	0	0	0	0	0	2	0	0	0	0	0	0	0	0	0	0	0	0	0	0
Cbx4	KY013293	CTTGGCACGGTTGTCAGCGG	2120	488	0	2	7	32	5	23	54	1	87	83	20	27	5	0	5	0	73	19	2	1	272	3	2	0
Cbx4	KY013294	TTGGAGCGTCGGGCAAAGGT	1169	283	464	6	7	17	6	17	34	0	19	7	1	13	0	0	26	207	2	80	27	22	1	0	0	7
Cbx4	KY013295	CTCGGGGCCGTGAAGCCCTT	3037	1119	31	156	598	150	2407	3780	539	233	795	356	79	213	15	19	8	111	67	14	1	172	46	13	12	344
Cbx4	KY013296	CGCTGACAACCGTGCCAAGC	3165	1071	4	36	75	3339	29	21	41	6	63	17	47	27	3	1	4	2	1	0	1	5	0	0	0	6
Cbx4	MGLibA_08247	CGACGCTCCAATGTTCTGAC	3707	456	58	19	68	481	89	6	199	9	6	2097	61	10	3	0	107	1	1	4	2	16	7	2	0	18
Cbx4	MGLibA_08248	CACGGCCCCGAGGTAGCCTT	2500	205	0	1	0	19	1	21	1	1	16	0	2	0	0	8	0	3	0	1	0	1	0	2	0	0
Cbx4	MGLibA_08249	AGGGCCCAAGCCCAAACCGC	1540	535	2	18	1	68	11	11	24	6	213	18	9	62	1	4	9	4	2	6	0	21	3	1	6	1
Cbx4	MGLibB_08247	CACTTGCAAGATATAACACG	1824	481	2852	81	435	3115	7049	1210	352	679	4695	372	14481	1156	891	43	4324	3641	74	3106	245	148	2611	250	363	116
Cbx4	MGLibB_08248	TGCTGATCGCCTTCCAGAAC	3025	1043	9	233	166	39	85	255	2	58	143	37	213	363	3	2	179	46	3	15	10	24	13	9	23	66
Cbx4	MGLibB_08249	ACAGGGCAGAGTGGAGTATC	1845	366	5	0	0	6	10	1	0	4	7	8	0	0	0	0	1	0	3	0	0	0	4	12	1	10
Cbx5	KY013297	CAAAGCAATGATATCGCTCG	1626	529	8	131	3	34	116	12	83	6	25	0	0	2	0	0	0	1	1	4	0	3	0	0	0	1
Cbx5	KY013300	TTCCCAAGTATTGTGCTCCC	6201	1856	1348	113	87	230	561	75	59	54	122	499	42	92	12	47	16	4	34	37	22	233	95	49	248	1844
Cbx5	MGLibA_08250	TAAGAACATTAAGTCACCGC	2293	566	572	309	22	29	245	13	20	85	479	6	91	184	257	18	52	133	113	14	89	114	52	34	24	20
Cbx5	MGLibA_08251	GTTGGACAGGCGCATGGTTA	2562	682	3	4	3	29	22	2	54	0	509	15	17	3	0	0	9	0	0	0	69	0	1	4	10	2
Cbx5	MGLibA_08252	TTTAATATCATCAGCGCTGT	3233	608	12	118	225	1003	415	345	52	45	68	19	858	7	23	15	241	469	226	15	15	4	92	0	4	21
Cbx5	MGLibB_08250	AGCAAAGCAATGATATCGCT	1159	410	1	2	13	29	8	38	6	37	9	6	6	39	1	0	0	80	0	2	1	8	9	1	2	9
Cbx5	MGLibB_08251	AGGGTGAAAACAATAAGCCC	610	241	90	9	614	7	22	12	4	6	41	3	1	16	3	0	0	3	0	0	31	1	0	0	2	1
Cbx5	MGLibB_08252	AGCCGACAGCTCTTCTTCAG	2382	1377	79	301	174	36	415	150	115	51	58	30	74	76	15	4	37	6	6	233	13	406	24	16	115	7
Cbx6	KY013301	CCCAATGACCCGGTTCCGCG	4126	877	36	180	96	336	8	4	201	166	19	312	66	47	84	0	0	30	9	23	9	12	24	3	23	53
Cbx6	KY013302	CAATGACCCGGTTCCGCGAG	2491	562	62	28	9	12	5	1	12	43	5	4	152	255	0	3	0	56	9	0	0	3	4	0	41	1
Cbx6	KY013303	CCGCGAGGGGACTTTCGGGC	6494	1999	6318	1248	1217	2472	4806	9819	2409	1045	25103	2007	1565	1685	12475	1079	309	2031	1505	967	6826	14903	3024	11708	6986	3037
Cbx6	KY013304	GAAAGTCCCCTCGCGGAACC	2160	663	68	171	467	946	1080	828	461	84	69	428	238	1481	3490	234	460	1893	256	29	111	357	630	62	73	21
Cbx6	MGLibA_08253	CGTGCGCATCATCAACCGTA	3809	697	39	26	131	39	4442	145	107	454	20	22	10	12	34	2	5	156	6	11	92	2869	12	7	34	255
Cbx6	MGLibA_08254	CCCGCCCGAAAGTCCCCTCG	4684	1358	228	6617	796	1222	417	847	997	495	986	291	3194	1063	383	140	148	413	141	230	58	300	208	94	133	106
Cbx6	MGLibA_08255	TCAGGGACGCATCGAGTACC	6240	1621	573	220	569	1066	178	82	468	73	290	188	812	215	12	8	18	6	7	62	0	42	16	7	73	141
Cbx6	MGLibB_08253	TCCAACTCACTTCTGCTCGA	4197	1277	108	131	1545	1692	189	84	2107	2040	76	208	384	263	3164	53	71	44	655	259	329	9	1103	11	1495	14
Cbx6	MGLibB_08254	GACTCGGCAGGTACAGCACT	4398	1448	1946	868	2005	3691	6199	1961	3943	666	3323	1167	1999	714	43	111	1167	539	3232	1440	365	2183	176	1443	2748	164
Cbx6	MGLibB_08255	GAAAGGGAACGTGAGCTGTA	2716	833	65	4	30	38	328	166	14	509	1355	31	29	8	14	5	10	7	4	1	3	2	5	2	6	2
Cbx7	KY013307	GAGACCGAGCCTCGGGGTAT	1686	187	1	0	0	3	53	0	0	0	5	3	0	22	2	0	0	3	0	0	0	0	0	1	0	0
Cbx7	KY013308	GAGGAGAGAGACCGAGCCTC	1092	138	0	2	25	0	172	14	73	74	46	0	1	28	0	0	0	0	0	2	0	1	0	0	0	0
Cbx7	KY013310	CGTAGGCCATGACAAGGCGA	2315	2401	33	35	495	485	696	340	380	40	398	348	665	239	6	20	18	24	5	1	1	12	5	8	46	49
Cbx7	MGLibA_08256	ACCTCTCTTCCTATACCCCG	5978	1595	13	360	64	486	38	125	766	208	1544	178	118	99	8	42	25	44	4	98	18	16	71	22	30	25
Cbx7	MGLibA_08257	GCCTATGGAGCAAGCCCCCG	3251	861	51	677	26	47	45	28	151	200	45	1215	123	1920	88	2	56	4	2	166	6	12	32	4	52	12
Cbx7	MGLibA_08258	CTTGGACCCTCGCCTTGTCA	6786	1588	1337	84	538	19	27	98	30	27	5	39	4110	476	55	46	30	6	14	26	12	128	10	27	6	1447
Cbx7	MGLibB_08256	GGGTCCTTACTTCTCCTCGT	2930	615	20	36	66	12	142	14	1156	4	6	15	11	260	0	0	3	0	1	22	2	4	28	1	25	168
Cbx7	MGLibB_08257	GGAAGAGAGGTCCGAAACCC	1023	138	2	0	0	0	0	10	2	0	0	0	0	0	1	0	0	0	0	0	0	0	0	2	0	0
Cbx7	MGLibB_08258	CCAGACGTTGTGCAGACCCC	4707	1601	151	408	190	772	298	1496	472	75	1156	551	448	120	17	95	113	8	10	323	29	50	36	70	55	42
Cbx8	KY013311	GGGTTTCGGTCCTCGTTTCT	1559	314	43	42	3	34	21	5	37	6	11	56	631	14	0	1	15	7	0	1	4	2	0	1	4	1
Cbx8	KY013312	CTCGGTCCCGGTCCCGAGGT	2985	475	4	1	7	1	54	5	400	3	11	173	6	170	2	7	0	0	11	5	398	216	5	79	0	5
Cbx8	KY013313	GGATTTGGCGTCTACTTCCA	2425	338	29	7	0	30	1	27	34	656	43	28	1	10	27	2	17	4	90	2	0	5	7	1	0	7
Cbx8	KY013314	GCTTGGGTCCTCGCTTTTTG	7351	2466	9759	14424	22655	9759	11841	13329	21429	7872	13417	17663	18609	20559	19977	26685	12604	4259	3541	15409	31209	9757	7785	8354	4427	7115
Cbx8	MGLibA_08259	GCGCCCCCATGTCCCGATAC	5410	1439	171	1347	264	455	1760	640	353	267	404	419	655	322	47	141	142	31	94	221	223	132	281	56	39	187
Cbx8	MGLibA_08260	CTCTATGGCCCCAAAAAGCG	1024	140	0	0	0	0	0	1	2	0	0	8	0	0	0	0	0	0	0	0	0	0	0	0	0	0
Cbx8	MGLibA_08261	GCCTGAACTATGTCGAACCC	3895	1550	64	28	244	227	85	53	314	1063	50	20	8	27	48	5	160	10718	7	15	492	51	357	7	17	3
Cbx8	MGLibB_08259	GCATGGAATATCTCGTGAAA	1302	234	2	10	0	0	18	2	113	5	0	0	1	6	0	0	4	1	0	14	0	0	0	0	0	0
Cbx8	MGLibB_08260	TTTCCTTTAGGTACAGCACG	3443	749	26	8	4	60	22	8	45	6	19	3	27	1	4	0	13	99	1	3	1	1	1	5	17	0
Cbx8	MGLibB_08261	TTTCTTTAGGGAACGGGAGA	733	251	1	1	32	14	5	0	11	9	17	13	12	7	2	1	3	0	0	2	0	1	2	4	3	1
Ccdc79	KY013883	TTCATTCTTAAACTCAGTTA	2218	575	84	4	111	8	24	3	42	2	0	14	23	54	1	9	0	0	1	9	0	535	4	2	21	2
Ccdc79	KY013884	CTTTGTCTCTTCGGGTGGAC	4900	1390	556	273	1038	2135	406	3047	293	52	705	44	257	1698	54	62	271	741	34	21	121	80	333	118	78	1204
Ccdc79	KY013885	AATTATTTCAAGATTTAACC	663	78	1	1	126	1	0	0	2	0	0	0	1	0	0	0	0	0	0	0	0	6	0	0	0	0
Ccdc79	KY013886	ATTTATTTCCGGGAAATTGG	906	327	1	2	0	0	1	0	4	4	2	3	2	3	0	0	2	0	0	5	0	0	0	0	0	1
Ccdc79	KY013887	GGTATTTATTTCCGGGAAAT	597	127	4	0	0	0	13	18	0	0	2	2	3	260	0	1	0	0	0	2	0	4	5	0	6	1
Ccdc79	MGLibA_08649	ATCATCATTAGTTAAGAGCC	1479	550	252	18240	233	6530	6898	555	2725	7617	2299	4394	517	4866	2918	45	1837	765	2152	86	1122	1225	119	296	120	275
Ccdc79	MGLibA_08650	GAAGCAGCCTTATACACATT	1650	622	10	351	28	0	6	204	5	3	8	8	4	382	5	0	3	0	114	5	3	1	1080	1	7	0
Ccdc79	MGLibA_08651	GGGCAACCCTTTGTCACAAA	994	285	6	95	6	7	3	1923	6	3	10	6	7	0	6	4	146	7	914	2	22	6	731	0	11	233
Ccdc79	MGLibB_08649	ACATCAAACCACCAATTTCC	2890	696	2	54	58	15	69	8	48	8	908	77	100	38	2	0	1	1	298	2	2	27	403	14	30	162
Ccdc79	MGLibB_08650	GACATTCCAACAGTAACTTC	2275	542	4	155	5	447	21	14	93	1	54	96	15	19	0	0	63	1	12	5	0	27	3	4	0	0
Ccdc79	MGLibB_08651	AAGTTCTGTCACAGATGTTC	1718	260	42	21	25	259	13	881	20	65	639	34	131	408	18	0	1	3	4	3	2	7	19	43	0	3
Ccl12	KY014039	TCACAGCTTCCCGGGGACAC	4194	1327	145	286	225	260	49	387	37	147	671	75	72	273	12	0	29	4	9	11	17	5	21	32	41	184
Ccl12	MGLibA_08745	TTAAGCAGAAGATTCACGTC	2414	604	8	124	13	21	217	2	29	7	8	125	5	32	7	0	3	9	3	2	7	2	57	2	2	1
Ccl12	MGLibA_08746	TTTGAGACGTCTTATCCAAG	2793	981	9	55	87	25	25	12	18	83	511	25	45	24	4032	64	33	4	4	12	23	49	2	8	48	1615
Ccl12	MGLibA_08747	ACAGATCTCCTTATCCAGTA	1956	503	3216	26	216	122	107	2	232	25	179	35	478	59	4	3	0	16	3	2	29	21	4	52	13	1
Ccl12	MGLibB_08745	ACATTATAACAGCACGTGAC	2678	602	3	3	56	1	2	16	0	0	4	95	19	6	1	0	14	16	6	74	0	8	1	0	0	5
Ccl12	MGLibB_08746	CCTGGTCCAGCCAATACCTG	4181	1140	56	482	229	94	81	21	127	10	19	10	1149	27	6	15	34	4	18	43	38	25	260	151	4	21
Ccl12	MGLibB_08747	TGATGGTGGTAGCTATGAGC	3384	1070	36	119	7	47	28	21	28	3	89	4	13	23	14	0	5	2	1	5	5	3	6	4	3	0
Ccl17	KY014040	TCAAAGGGGCCATTCCTATC	3773	1041	700	95	14	75	152	10	15	9	13	3	40	27	4	1	1	2	0	2	2	0	36	5	34	4
Ccl17	KY014041	CCTACATTGGTGGCTCGAGC	3221	903	124	604	188	512	505	21	245	90	84	28	74	118	196	174	2515	763	14	618	16	70	43	258	131	120
Ccl17	KY014042	GCAGCACTCTCGGCCTACAT	4283	1226	18	69	1812	1580	16	126	421	85	8	255	629	830	193	4	21	1118	200	724	9	11	11	32	21	206
Ccl17	MGLibA_08748	GCACTCTCGGCCTACATTGG	5371	2090	156	739	200	1482	52	563	102	132	292	107	150	480	9	11	6	6	13	1330	19	174	41	4	104	26
Ccl17	MGLibA_08749	TGGCCCCTTTGAAGTAATCC	4699	1719	1074	181	6	373	426	31	232	151	4594	1867	185	303	816	22	21	25	16	108	15	28	58	14	5325	1805
Ccl17	MGLibA_08750	GTCACTTCAGATGCTGCTCC	4492	1545	6848	424	40	518	220	118	73	19	232	24	69	22	2342	79	3751	1285	12	17	5	8908	36	10	6048	695
Ccl17	MGLibB_08748	TCAGATTGGTGAAAAACCCA	1077	404	5	50	8	4	0	1	10	8	2	5	9	9	2	0	0	3	18	1	15	2	0	2	6	3
Ccl17	MGLibB_08749	CAGCGGGAAGGTCATGGCCT	3300	1018	331	1610	152	510	2008	280	1960	401	74	134	471	2145	2	5	111	29	8	57	1	27	64	30	7	950
Ccl17	MGLibB_08750	TTTCTGCAGCATGCCAGAGC	4126	1229	47	75	31	211	617	570	83	116	36	597	4	39	232	0	27	475	9	2	38	9	137	5	6	82
Ccl2	KY014044	GATGATCCCAATGAGTAGGC	1643	291	79	16	10	215	13	17	1	4	92	1	0	0	1	5	0	68	0	0	4	2	3	1	1	2
Ccl2	KY014045	AGCTCTCCAGCCTACTCATT	3811	1313	5	138	15	30	28	15	81	28	1982	12	43	405	2	3	114	8	38	4	13	1	1	4	7	6
Ccl2	KY014046	TCTGGACCCATTCCTTCTTG	7628	2223	960	74	248	144	99	364	121	20	14	26	73	384	44	137	20	0	29	39	388	297	317	3285	7	58
Ccl2	KY014047	GTCTGGACCCATTCCTTCTT	5715	1670	168	55	69	147	43	46	133	28	306	29	137	223	155	12	0	5	26	25	102	29	14	103	4	15
Ccl2	MGLibA_08787	ATCTCATTTGGTTCCGATCC	4946	2140	38	243	1044	437	614	1123	265	382	737	84	96	463	5	38	232	91	3	19	131	23	2003	77	44	303
Ccl2	MGLibA_08788	TGCTGTTCACAGTTGCCGGC	3677	1280	10	148	10	19	66	47	24	18	30	35	14	19	5	3	33	4	8	13	2	12	6	4	10	7
Ccl2	MGLibA_08789	AGCCGGCAACTGTGAACAGC	2118	1260	144	367	105	174	98	179	180	393	129	170	143	70	5	6	21	160	13	84	12	19	12	55	63	20
Ccl2	MGLibB_08787	GCTGGTGAATGAGTAGCAGC	1835	471	2	51	2	4	7	7	58	13	86	3	3	193	6	0	16	0	1	2	0	0	3	4	0	24
Ccl2	MGLibB_08788	GTGCTGACCCCAAGAAGGAA	771	553	17299	15776	49423	18025	7757	5617	24778	7313	9634	5676	13135	11580	19444	3612	21221	19828	4515	28907	46475	8359	17664	20315	3897	8368
Ccl2	MGLibB_08789	GCAAGATGATCCCAATGAGT	2348	719	202	7	3	24	2	6	75	79	12	104	10	8	1	0	32	0	5	4	42	6	8	1	4	1
Ccl5	KY014076	GTAGAAATACTCCTTGACGT	2165	370	10	12	182	54	116	122	5	303	2	2	11	5	0	0	4	3	2	123	1	1	0	0	1	1
Ccl5	KY014077	CACGAGGCAGCGCGAGGGAG	2124	1096	4	26	71	50	332	19	24	1	157	4	12	17	0	0	7	0	2	0	8	7	23	28	71	5
Ccl5	KY014078	GCTGCCTCGTGCCCACGTCA	6782	2756	1345	7108	152	2029	1758	350	2892	128	292	9573	2164	2319	1210	374	928	505	564	2367	387	659	2340	3264	4816	8527
Ccl5	MGLibA_08796	GACTCACACGACTGCAAGAT	2222	541	2	12	58	7	26	25	14	6	7	17	49	1	9	0	1	0	11	6	0	2	1	1	2	41
Ccl5	MGLibA_08797	TGTAGAAATACTCCTTGACG	2429	618	265	89	139	1433	38	85	63	664	111	2608	74	116	31	4	474	2757	367	21	0	538	47	16	22	3
Ccl5	MGLibA_08798	CCTGCAGGTTTGTCACTCGA	4934	1533	39	728	171	28	299	9	618	50	38	20	52	211	7	1	6	4	2	5	28	1	22	6	5	5
Ccl5	MGLibB_08796	CTCGACTTACATGGTGAGGC	2725	1021	14	30	63	82	25	435	6	3	808	126	10	61	5	73	3	3	243	5	3	32	491	11	1	12
Ccl5	MGLibB_08797	TCAAGAATACATCAACTATT	1518	693	3	73	16	4	105	14	11	2	3	4	23	109	1	0	1	4	4	3	1	3	5	1	0	1
Ccl5	MGLibB_08798	TGCAGAGGGCGGCTGCAGTG	3304	662	12	48	5	18	12	9	246	5	137	38	10	45	12	0	140	7	0	1	3	25	40	3	1	0
Ccnt1	KY014215	CTTCGAGTTTAAACGGAGGT	871	526	6	555	1	74	94	89	482	8	1	5	123	3	6	1	15	4	0	4	3	48	48	1	19	3
Ccnt1	KY014216	TTCGAGTTTAAACGGAGGTT	1638	398	13	15	112	38	221	2936	7	37	14	43	178	74	1	2	812	13	5	26	15	1266	10	2	9	0
Ccnt1	KY014217	ATCGAGCAGTCTAACTAGTG	2529	331	1265	13	739	1	642	0	1	29	24	15	42	3	11	6	130	0	7	0	0	5	40	1	8	5
Ccnt1	KY014218	TGCTTCGTCCTAGGCGTACC	3437	629	9	2	21	17	39	0	23	4	4	36	8	35	1	9	1	6	0	0	0	1	125	17	1	0
Ccnt1	KY014219	GGCTGAAACGTATTCGGAAT	1091	139	0	0	0	4	2	1	78	1	1	0	0	0	0	0	0	0	0	0	0	2	0	2	0	0
Ccnt1	MGLibA_08889	AAGTGCACCCAGCTTGTTCG	2300	171	1	0	0	1	17	1	0	0	5	0	0	0	0	22	1	0	13	1	0	0	0	4	0	0
Ccnt1	MGLibA_08890	GTTACTTACCTCGAACAAGC	1350	205	20	23	3	115	28	7	0	0	0	78	84	29	0	0	4	0	3	0	1	7	26	3	0	0
Ccnt1	MGLibA_08891	CCAGATCTTGAACTTGTTGT	2435	230	3	0	0	9	51	0	3	0	0	0	9	6	0	0	0	0	0	0	0	0	4	1	0	0
Ccnt1	MGLibB_08889	ACTTCCTGACACGAGGAGTG	1967	277	1	0	1	3	107	13	30	2	5	42	0	0	418	11	4	0	27	0	0	2	9	1	2	0
Ccnt1	MGLibB_08890	CTCACCTCACTCCTCGTGTC	9818	1728	120	759	258	1241	44	63	268	297	761	221	483	170	66	11	759	276	34	10	48	2	27	191	16	73
Ccnt1	MGLibB_08891	CCTACAACAAGTTCAAGATC	1039	100	0	0	2	7	0	15	0	906	1	0	2	1	0	0	3	0	1	106	3	0	3	0	1	0
Ccnt2	KY014220	GCAGCTCTAGGGTAACCGTG	1538	293	12	1434	0	23	0	7	0	0	0	0	4	4	0	2	587	1	0	0	4	22	0	0	0	5
Ccnt2	KY014221	TAGCAGCTCTAGGGTAACCG	1501	209	3	71	3271	0	0	24	6	10	1	36	5	0	88	3	2	10	321	1	127	15	0	0	0	4
Ccnt2	KY014222	GGTTGAAGAGGATTCGAAAC	866	373	13	116	76	46	738	47	26	1202	54	5	27	31	0	2	35	3	6	4	3	7	96	8	6	5
Ccnt2	KY014223	TGAAGAGGATTCGAAACTGG	1326	193	7	9	9	4	68	14	0	4	0	24	21	80	0	0	2	0	0	0	0	2	79	3	0	23
Ccnt2	KY014224	GCAGGGAACGTTGATGTTGA	1922	891	3	1	3	0	64	49	54	6	9	10	5	40	9	2	3	2	0	12	1	2	30	1	0	0
Ccnt2	MGLibA_08892	ACCACTCACCTCTTACTAAC	3722	838	26	11	67	145	8	21	99	28	89	26	4	7	3	7	1	11	1006	4	11	34	24	2	0	5
Ccnt2	MGLibA_08893	CTGCGATTGTTTATATGCAC	3317	753	27	54	125	102	7	20	3	4	21	1810	2	72	2	0	2	2	2	0	392	5	1	2	18	0
Ccnt2	MGLibA_08894	AAATGCACCCAGTTAGTAAG	1491	269	39	103	2	152	75	13	20	18747	64	296	433	11	5880	72	9	15	1531	27	21	188	10709	10	549	215
Ccnt2	MGLibB_08892	ACCCAGTGTTTGTAGCATTA	2216	600	43	71	386	453	265	195	22	27	3	27	12	95	5	0	139	2	0	1	2	4	48	0	5	8
Ccnt2	MGLibB_08893	GCAGCCAAAAACAATGCAGT	647	53	3	0	0	0	0	0	0	0	0	0	0	0	0	11	0	0	0	0	1	0	27	0	0	0
Ccnt2	MGLibB_08894	TCTTCAGCAGACTCAAGAAC	1592	287	0	5	709	48	8	27	2	2	56	9	9	8	2	1	4	0	4	0	0	5	2	4	5	5
Ccr4	KY014264	TCCAAAAACCCACTGGTCGG	1299	290	37	17	942	517	2	18	110	5756	13	2312	11	2188	25	34	16	20	41	4	0	42	99	4	16	33
Ccr4	KY014265	CAGCAGGTACACGTCCGTCA	3414	1535	1234	1309	1119	16497	495	2634	1241	4088	622	1248	666	2844	463	200	189	67	1511	381	1027	2406	7380	1007	3305	1802
Ccr4	KY014266	ATACCTGGCCATCGTGCACG	4859	1245	51	197	93	139	172	47	529	89	168	70	61	86	41	10	579	70	61	230	49	61	10335	3	7	76
Ccr4	KY014267	CTACTACGCCGCCGACCAGT	4565	1073	467	151	368	7781	121	61	1346	49	700	17	148	40	11	8	250	18	30	4	5	24	16	13	111	18
Ccr4	MGLibA_08925	TGTACGGCGTCCAGAAGCCG	3868	1233	389	3018	1653	10286	4281	1337	1073	11368	818	755	14384	1438	6	14	13	24	2514	549	264	409	239	9	4097	53
Ccr4	MGLibA_08926	TCGTCGAGTTGACCGAGTAC	5606	2187	45	592	332	262	230	40	627	11	104	445	261	95	16	45	110	387	298	626	131	102	283	85	21	458
Ccr4	MGLibA_08927	AGTGCGCATGATCTTCGCCG	5506	1235	28	77	863	179	181	179	2226	49	10	267	618	287	9	1	102	1	23	5	0	45	6	14	25	42
Ccr4	MGLibB_08925	GTACCTAGACTACGCCATCC	4073	1203	43	399	137	2	158	2416	65	7	19	45	82	63	2	2	5	5	7	7	7	7	1027	8	37	0
Ccr4	MGLibB_08926	GCACGCGGTATTCTCCTTGA	3640	1060	33	189	90	159	31	177	83	84	51	72	369	33	17	20	683	186	4	9	14	498	196	396	10	61
Ccr4	MGLibB_08927	GCTACTACGCCGCCGACCAG	2688	705	27	61	14	231	4	10	47	13	86	1411	9	20	0	7	74	4	1	0	3	41	15	7	6	0
Cd27	KY014503	TCTTACCTGGCTCACACATC	5037	1865	36	30	46	83	54	26	91	30	186	107	20	27	11	9	49	25	40	6	18	16	5	19	15	4
Cd27	KY014504	GACAAACACTACTGGACTGG	4508	477	51	0	0	33	24	5	23	13	6	28	0	0	29	0	8	56	0	0	3	0	6	0	1	32
Cd27	MGLibA_09096	CTGGCTATAGACAGTCGAGT	3277	461	48	551	25	321	109	197	37	362	1856	31	119	483	22	18	10	733	53	12	2	47	96	17	426	52
Cd27	MGLibA_09097	CGGGTTTCCGGTAGTCCTCC	5509	2130	38	484	407	389	59	77	213	35	73	1454	195	148	70	4	42	22	26	16	45	38	308	117	12	5
Cd27	MGLibB_09097	GCTGTCCAGACAAACACTAC	2053	708	399	11	8	2535	32	14	19	12	0	25	44	366	0	22	4	263	4	1	28	12	5	1	7	9
Cd27	MGLibB_09098	TTGCACAGATGAAGACCGGC	2045	920	8	34	24	47	83	55	21	12	497	17	78	205	4	1	1	19	3	3	7	2	15	0	0	3
Cd274	KY014505	GGTCCAGCTCCCGTTCTACA	3583	1484	1119	380	2782	28	339	637	121	997	136	64	54	52	8	6	22	19	10	7	13	80	176	2	20	832
Cd274	KY014506	AGTACACCACTAACGCAAGC	1476	679	11	190	12	21	258	25	39	273	80	214	210	29	7	23	813	34	125	91	10	184	104	118	428	59
Cd274	KY014507	CTGGTTGATTTTGCGGTATG	3950	1341	223	40	110	4088	7580	19	500	240	133	27	1618	6058	23	2	180	5	49	10	5	5	74	25	45	104
Cd274	KY014508	TCTGGTTGATTTTGCGGTAT	5170	2876	2366	10078	6573	2464	1968	1622	3471	11618	5176	2619	18617	2383	1395	2319	61668	10902	316	3144	466	2419	1324	2634	2221	722
Cd274	KY014509	CTCTGGTTGATTTTGCGGTA	2354	1102	69	5391	154	155	113	179	99	220	96	69	461	650	57	603	17740	658	15	132	51	2446	69	130	148	6476
Cd274	MGLibA_09090	GTATGGCAGCAACGTCACGA	3037	1085	135	253	13	2	362	784	2695	58	453	613	1595	124	4	11	3	4	7	14	1	6	11	7	2	9
Cd274	MGLibA_09091	CTGGATCCACGGAAATTCTC	2428	944	70	18	7	19	47	68	12	25	89	4	25	31	5	330	2	3	7	0	27	3	7	10	2	3
Cd274	MGLibA_09092	TCCAAAGGACTTGTACGTGG	2687	1120	18	119	1600	679	73	35	125	18	62	30	226	276	5	3	20	6	5	3	3	2	13	2	16	8
Cd274	MGLibB_09090	GGACCGTGGACACTACAATG	2351	642	92	47	39	158	12	14	60	32	154	693	43	18	1	2	69	7	11	3	3	11	11	0	36	10
Cd274	MGLibB_09091	GGATGATCAGCTCCGCTGTG	3326	1098	11	36	117	67	12	10	11	2	481	33	19	28	3	3	2	1	7	1	0	8	37	0	5	2
Cd274	MGLibB_09092	TTTAGTGAGAATGCTAGATG	1970	773	86	104	125	1659	2042	1663	208	126	839	778	140	194	2	15	46	301	19	14	341	881	504	9	143	77
Cd276	KY014510	CCAACAAGGACCTACGTCCA	3887	1530	34	14	66	21	91	440	299	90	90	43	184	1585	1345	39	135	8	15	0	11	1477	552	19	9	6
Cd276	KY014512	AGCTGCCCTCGTCGGTTACT	4948	1987	18516	37321	6490	78943	45509	130030	10479	91713	40298	27543	71952	40552	191572	181326	76912	97597	248019	249088	144452	71335	147380	193399	28187	92142
Cd276	KY014513	TGGGGAAAAGGAGCAGCGTA	1069	474	3	1	29	155	29	2	3	1	36	4	6	37	4	0	0	0	249	2	6	25	404	7	0	0
Cd276	MGLibA_09093	GCGCGTCCGAGTAACCGACG	2211	769	35	31	8	8	11	28	8	10	18	119	23	16	2	1	17	4	0	1	0	26	5	3	4	5
Cd276	MGLibA_09094	ATCGAACAAGCCCCGCTCGT	3164	538	3	98	110	952	10	20	60	29	56	207	1468	3	1	22	3	5	3	7	3	161	220	1	8	7
Cd276	MGLibA_09095	CCCAACAAGGACCTACGTCC	3891	1602	290	45	877	63	370	36	46	17	1178	61	39	120	78	4	242	88	4	4	9	83	217	6	27	10
Cd276	MGLibB_09093	TCGGACGCGCTGCAGCCTCA	6775	2509	22	46	186	112	362	36	116	156	78	224	1941	36	112	1	270	3	63	76	12	27	439	12	157	31
Cd276	MGLibB_09094	CCTTGTAGGTGCCGAGGACC	3914	1699	157	55	125	180	216	134	67	1514	70	281	271	13	7	11	1739	30	9	83	814	80	3	3	6	6
Cd276	MGLibB_09095	TTCTCCAGCACACGAAAGCC	3438	1053	205	785	1416	145	26	41	43	235	62	20	87	28	4	6	77	20	0	76	3	5	11	10	107	100
Cd28	KY014515	ATGCCGAGTTCAACTGCGAC	2804	874	113	7	8	42	11	5	6	45	34	50	39	66	7	2	4	12	25	7	33	41	8	6	6	2
Cd28	KY014516	AAACAGTGACGTTCCGTCTC	2705	688	5	165	49	38	105	1	10	2	4	14	25	35	6	3	131	4	2	5	34	0	0	2	1	2
Cd28	KY014517	GCTGTTCACGCCCTTGTACA	3594	1007	5	47	143	548	91	23	286	144	407	31	61	25	339	1	11	9	89	8	1	123	13	2	7	6
Cd28	KY014518	CTCGGCATTCGAGCGAAACT	1652	637	8	1292	18	0	6	51	6	24	18	38	22	10	1	5	1	0	0	6	4	1	5	20	0	5
Cd28	KY014519	ATCCCCGTCGCAGTTGAACT	4398	1587	382	2163	16630	2004	3261	991	620	8265	6780	786	6879	1711	307	23	70	2585	382	511	644	552	986	102	119	98
Cd28	MGLibA_09099	CGCCTTACCTAGACAACGAG	2358	740	23	25	8	13	56	97	66	2	4	133	24	179	18	193	297	48	353	21	789	11	47	0	4	895
Cd28	MGLibA_09100	CCCGGAATTCCTTTGCGAGA	2001	434	1	4	1	541	129	1	6	1	3	8	0	16	3	6	3	2	0	0	13	2	0	0	2	0
Cd28	MGLibA_09101	GCGGTACGCTGCAAAGTCTC	2326	777	130	41	1408	5400	56	505	28	33	24	75	614	1076	7	0	99	18	15	6	1195	182	29	39	40	941
Cd28	MGLibB_09099	CTAGCAAGCCATAACAAAAC	870	537	789	22	120	55	112	29	74	475	171	5	158	42	4524	55	88	20	12	3878	28	11	1388	10	232	0
Cd28	MGLibB_09100	CCCCCTAGACAAATAGTAGA	1110	425	1	0	8	1	19	21	17	63	16	9	170	38	5	0	12	11	47	1	0	1	3	1	1	0
Cd28	MGLibB_09101	CAGTGGCTCTTTGTGTTATC	3262	1034	11	1	303	11	61	1	11	31	140	10	4	32	1	5	5	59	0	8	1	1	0	2	1	5
Cd4	KY014612	TATCACGGCCTATAAGAGTG	3013	615	434	50	792	198	88	4419	49	123	40	48	69	10	2	11	1	2	585	3347	38	6	60	505	2	7
Cd4	KY014613	CTGAACCCTTAGGTTGGACA	2262	914	23	15	3	161	234	3	22	9	13	6	91	46	2	22	9	8	37	0	3	13	23	3	23	7
Cd4	KY014614	CAGGCTGGTACCCGGACTGA	3363	940	6	428	5	9	3	0	4	8	1	13	16	12	1	1	11	2	44	19	3	21	659	1	5	0
Cd4	KY014615	GACCTTGGATAGCAACTCTA	1316	345	3	10	0	6	9	5	17	11	4	6	3	9	0	0	3	1	0	0	2	0	0	1	0	1
Cd4	MGLibA_09186	CAGCAAACTGAAGCGAGACC	2218	513	7	10	77	26	23	37	29	13	17	6	29	19	3	15	0	0	0	0	2	1	44	0	0	3
Cd4	MGLibA_09187	CTGGAACTGCACCGTGACCC	4666	1464	33	57	74	848	117	19	218	33	284	180	185	187	11	36	25	2	7	17	13	50	17	8	7	48
Cd4	MGLibA_09188	GACCTTAGAGTTGCTATCCA	2442	537	6	69	404	10	19	17	23	46	27	44	2	35	0	0	0	2	1	1	9	7	21	57	5	2
Cd4	MGLibB_09186	TCGCTTCAGTTTGCTGGTTC	4760	1621	32	457	141	178	168	206	233	63	103	2988	105	154	36	18	22	40	178	8	975	2	23	26	52	13
Cd4	MGLibB_09187	TCAAAACGATCAAACTGCGA	1504	513	452	150	98	1657	32	191	317	48	30	41	15	236	2	6	3	11	6	77	4	35	77	7	204	11
Cd4	MGLibB_09188	TCAGACTTATATCTGTGAGC	2454	403	0	0	44	61	12	3	22	0	0	14	11	7	8	0	3	10	1	3	0	1	0	1	0	4
Cd40	KY014616	TCCGCTCAGATCAAGGGCTT	3490	1111	14	44	50	199	91	1139	39286	1405	15	37	25	41	4	0	32	51	1011	11	23	3	27	140	2	3
Cd40	KY014617	TCAAGGGCTTCGGGTTAAGA	2097	446	1	2	1	31	1	0	13	2	1	0	8	0	0	0	1	0	81	0	0	1	0	0	0	0
Cd40	KY014618	CTGCACCAGCAAGGATTGCG	2225	827	38	1511	174	1240	34	47	16	3	75	190	14	397	0	1	35	15	4	3145	366	36	11	135	48	2
Cd40	MGLibA_09171	ACATGCCTCGCAATCCTTGC	6026	1942	47	1104	181	5530	183	163	2431	328	4262	135	4715	1318	33	48	1132	804	105	56	19	118	257	822	708	70
Cd40	MGLibA_09172	CCCCATAGCGCGCACAGCCG	3746	1211	172	45	92	154	408	89	204	4	52	80	38	320	52	6	51	404	2	6	3	84	39	516	110	25
Cd40	MGLibA_09173	ACGTAACACACTGCCCTAGA	3507	688	1	6	24	29	2	0	27	4	56	2	6	32	1	4	1	1	0	0	109	1	6	23	0	0
Cd40	MGLibB_09171	GACAAACAGTACCTCCACGA	1707	376	17	1	12	25	13	4	71	0	4	4	26	10	11	2	11	638	7	0	32	2	6	274	0	18
Cd40	MGLibB_09172	AGCGAATCTCCCTGTTCCAC	3615	1428	34	195	76	407	199	33	67	21	369	496	68	34	2	1	9	173	3	8	314	78	6	1	31	18
Cd40	MGLibB_09173	GCAGTGTTGTCCTTCCTTAC	3428	1251	69	565	2299	106	32570	1113	2492	332	1224	1168	11726	430	7	8	33	50	21	32	475	103	108	115	11	156
Cd40lg	KY014620	TTCCTTATCACCCAAATGAT	3110	823	39	88	14	7	333	40	53	20	41	7	75	98	2	17	2	139	3	191	25	5	83	7	3	4
Cd40lg	KY014621	AAAGCACAGATCCAATCATT	1847	408	3	1	17	14	21	10	0	5	0	1	25	0	0	0	0	96	0	1	0	1	3	0	3	0
Cd40lg	KY014622	TATTTCAAAACAGGTCGAAG	1115	163	0	6	0	0	0	3	158	0	0	0	1	11	0	0	0	34	2	0	0	18	0	0	4	0
Cd40lg	MGLibA_09168	AGTCAACGCCCATTCATCGT	3980	2024	18	97	390	58	103	89	232	14	2587	90	66	863	116	6	12	3	226	8	29	12	266	79	73	9
Cd40lg	MGLibA_09169	AGCCAGAGGCCGACGATGAA	1175	560	6	44	17	10	78	8	6	8	25	36	1	2	2	2	1	5	1	4	8	1	15	4	0	16
Cd40lg	MGLibA_09170	GCCAACAGTAATGCAGCATC	3182	1870	88	52	197	372	289	188	251	307	1632	178	517	408	158	21	14	22	57	9	18	55	231	63	64	27
Cd40lg	MGLibB_09168	ACCGGATGCTGCATTACTGT	5171	2136	183	1077	375	12722	5917	127	860	358	8910	315	225	237	18	204	281	269	37	41	3341	28	70	2507	2997	55181
Cd40lg	MGLibB_09169	GCAATTTGAAGACCTTGTCA	2803	950	5	44	40	33	712	87	220	12	22	27	7	5	0	0	46	2	4	5808	16	79	0	7	11	40
Cd40lg	MGLibB_09170	CATCTCCTCACAGTTCAGCA	4983	2185	77	667	83	306	1213	424	684	355	114	52	463	140	636	9	164	18	1567	54	95	194	216	322	101	1392
Cd70	KY014688	CCTGCTCCCCAGCGCAGTGT	4789	1526	562	12659	37	157	796	176	132	906	308	201	2276	1056	120	240	879	76	73	356	33	2445	4043	51039	55	469
Cd70	KY014689	GTGGGGTCCTTCCGAGGAAC	1330	556	8	29	5	43	11	16	30	83	0	24	15	541	1	98	16	0	31	170	8	9	2449	2	159	1
Cd70	KY014690	CTTCACACACGGACCAGAGC	2478	799	7	30	471	11	22	3	1	0	19	96	98	28	19	5	8	113	1	0	4	9	4	4	0	16
Cd70	KY014691	GAAGGACCCCACACTGCGCT	2335	687	694	25	37	35	31	37	20	344	16	2377	214	16	0	3	4	0	1	136	13	4	371	5	6	14
Cd70	KY014692	TCTGTCCCCAGTTCCTCGGA	6238	1868	9	52	56	33	72	11	88	21	64	527	160	101	8824	93	53	6446	31	344	15	10	9	13	8	10
Cd70	MGLibA_09222	GGACCGCGTTCCAGCGCCAA	2390	672	8	10	605	9	4	12	11	13	8	11	5	356	4	34	0	0	2	3	0	6	0	0	5	1
Cd70	MGLibA_09223	GCGTTGCGGGACGGCAGCAG	2724	1025	51	48	4	30	412	42	215	144	4188	112	287	134	10	6	9	21	13	9	4	2	15	25	4912	18
Cd70	MGLibA_09224	CAAGCTGATGCCGTGCGCAG	3469	1147	21	11	93	259	283	298	141	112	393	50	18	208	33	85	29	1160	2936	6	56	54	50	11	77	91
Cd70	MGLibB_09222	GCCCTTGCCCCTGGGTTCGC	7203	2693	39	917	134	167	229	102	501	223	549	32	168	45	125	718	62	626	245	43	2094	56	154	946	34	14
Cd70	MGLibB_09223	AGCTGTAACTCAGCTGTGTG	2216	684	19	2	0	0	8	2	126	1	2	13	15	3	0	0	1	7	0	0	47	1	0	0	0	0
Cd70	MGLibB_09224	GAGTTACAGCTGAATCTCAC	2009	410	16	357	190	122	13	16	3	3	271	43	120	100	7	8	48	2	54	69	34	6	35	6	17	6
Cd74	KY014698	TGTCTAGGCGGCCCTGTTGC	10405	2447	231	2313	2139	1669	572	2339	2371	1453	3138	903	1552	172	502	1812	796	82	238	8942	215	344	896	39	416	2582
Cd74	KY014700	ACCTGTGAGCCAGATGCGGA	1607	406	20	12	51	66	41	23	173	31	22	24	273	48	5	1	2	3	1	1	0	5	5	9	2	0
Cd74	KY014702	GACATTGGACGCATCAGCAA	2428	938	7	10	13	54	76	20	9	56	60	64	18	398	0	1	122	2	27	4	93	91	7	15	0	6
Cd74	MGLibA_09228	GCTGATGCGTCCAATGTCCA	4107	1081	6	342	3	28	126	19	167	9	13	9	28	188	9	3	16	0	38	2	76	14	8	2	142	6
Cd74	MGLibA_09229	ATTTCGGAAGCTTCATGCGA	2152	461	3	10	0	9	206	7	0	94	54	18	4	0	0	0	0	0	0	0	0	0	0	1	1	23
Cd74	MGLibA_09230	GAGGTCGCGTTGGTCATCCA	4183	1146	35	465	258	118	1724	36	82	173	211	52	285	284	15	38	1107	39	21	150	8	215	116	75	503	85
Cd74	MGLibB_09228	AGGGAGTAGCCATCCGCATC	2605	974	9	58	477	35	67	34	127	24	30	49	20	22	13	5	14	2	17	3	4	13	18	1	7	8
Cd74	MGLibB_09229	CTGGGTCATGTTGCCGTACT	6750	2045	20013	40262	9265	81938	49189	136441	10853	93884	41391	31611	75276	42684	208940	197839	81933	202728	267094	255791	155059	75773	152859	202838	29434	99596
Cd74	MGLibB_09230	ACCGCCCTAGAGAGCCAGAA	1943	686	6	42	37	409	280	937	70	89	9	41	51	151	70	0	27	8	7	3	6	2	23	5	12	26
Cd80	KY014713	GGCCTGGTCCTTTCAGACCG	2605	542	6	22	2	12	21	1	34	11	230	10	6	13	0	0	0	1	2	0	7	1	4	0	3	5
Cd80	KY014714	CTTCATGAGGAGAGTTGTAA	1298	251	25	54	0	1	4	9	0	3	27	0	6	21	2	1	1	1	0	2	0	2	1	0	0	14
Cd80	KY014715	TCCCAAAGCCTCGCTTCTCT	8876	3591	106	718	651	585	108	808	737	39	293	195	53	266	14	182	188	121	21	76	6	32	282	26	50	12
Cd80	KY014716	TTTCCAGACTCAGTTATGTT	4536	1807	732	318	146	112	783	141	32	2439	285	123	262	420	44	3	22	400	7	74	35	51	84	18	18	22
Cd80	KY014717	AACCAAGAGAAGCGAGGCTT	1051	586	68	53	99	197	175	650	29	19	499	73	381	297	10	3	5	31	4	238	19	7	23	0	51	2
Cd80	MGLibA_09240	GAGTCGTATTGAAATCTAGT	975	158	1	12	0	14	18	0	0	0	3	7	3	4	0	0	0	1	0	4	0	0	0	71	6	2
Cd80	MGLibA_09241	AGTCTGAAGACCGAATCTAC	2037	648	13	70	25	23	33	30	15	7	292	3	59	0	0	9	3	0	6	11	5	2	1	0	7	6
Cd80	MGLibA_09242	CATCAATACGACAATTTCCC	3440	1337	48	101	2085	409	14	83	608	12	21	149	261	183	42	1	44	4	8	247	5	8	25	4	35	17
Cd80	MGLibB_09240	TGTGGCCCGAGTATAAGAAC	1557	366	1	37	1	2	13	5	99	10	6	71	1140	9	3	71	0	19	1214	3	13	932	358	1	3423	168
Cd80	MGLibB_09241	TGTTCAGCTAATGCTTCTTC	7644	3328	2977	5693	15774	9315	4033	6018	6584	9274	4188	2390	2593	4375	7348	276	1445	956	3409	5164	2072	1177	4978	2339	8343	9751
Cd80	MGLibB_09242	ACAAGTGTGTTCTTGCTATC	4039	1322	41	110	151	336	519	158	7913	205	128	42	48	54	55	115	27	190	208	523	76	159	19	14	31	2941
Cd86	KY014734	ACTAATTCAACTAATGAGTA	1382	388	0	8	2	0	2	1	0	0	6	0	2	1	0	0	0	0	0	1	2	1	3	3	0	1
Cd86	KY014736	TGGAGGATAATTGATCCTGT	3302	1022	7	111	42	8	3	27	151	7	18	3	39	39	45	9	20	0	1	5	7	30	0	1	0	0
Cd86	KY014737	CGTACAGAACCAACTTTTGC	2352	364	24	10	59	25	874	2	7	24	8	3	48	16	147	5	2	3	0	0	1	130	43	7	0	5
Cd86	KY014738	TCTGCCGTGCCCATTTACAA	4877	2581	1466	850	3879	266	6283	2271	825	23314	4971	4479	969	7437	39	51	6000	5684	454	29902	316	7444	108	899	6618	376
Cd86	MGLibA_09255	GTGACCTTGCTTAGACGTGC	3629	1042	115	182	75	1001	7	896	39	14	15	22	615	75	26	4	3	0	19	3	7	15	18	16	13	79
Cd86	MGLibA_09256	TTGACCTGCACGTCTAAGCA	4179	1177	19	43	412	13686	593	23	338	29	41	78	121	110	19	3	8	14	9	83	7	14	15	13	9	12
Cd86	MGLibA_09257	TTCCATCTCCTCAAACGTAT	2544	1080	29	40	4	93	20	16	57	5	249	17	70	10	0	5	27	5	5	6	2	1	15	6	1	21
Cd86	MGLibB_09255	CGAGCTTTGACAGGAACAAC	2039	592	0	29	0	32	29	72	11	3	108	66	713	15	0	4	0	9	2	3	2	3	105	0	0	1
Cd86	MGLibB_09256	GAAATAAGCTTGCGTCTCCA	1981	586	2	15	24	21	1362	8	3	137	1	4	168	6	1	3	1	0	1	5	0	7	31	0	1	98
Cd86	MGLibB_09257	ATCTCCTTCCAATACGTTTG	4397	1552	88	13000	53	49	1344	1132	72	60	92	19	188	1706	103	1044	6	49	7	260	219	230	19	4	5	45
Cd8a	KY014739	GTGTTGGGGTCCGTTTCGCA	3228	1083	37	80	350	32	422	10	76	221	248	38	26	46	2	6	7	4	13	20	2	39	8	11	394	1846
Cd8a	KY014741	ATCCCACAACAAGATAACGT	1352	191	0	0	2	1	1	0	0	0	1	0	195	0	0	0	0	0	4	13	1	1	0	0	104	6
Cd8a	KY014742	CCAAGAGCATCCTTGCGAAA	1743	757	11	28	111	9	171	3	115	14	41	21	75	89	2	1	3	10	6	3	7	9	8	56	15	2
Cd8a	KY014743	TGAAGCCATATAGACAACGA	1950	859	152	129	25	56	457	37	13	56	35	352	34	84	2	28	21	0	1	1	576	59	3	9	10	5152
Cd8a	MGLibA_09258	CGTCCCACGTTATCTTGTTG	8354	4209	8214	14054	223	698	295	208	382	869	1057	2896	2369	1502	189	1075	1220	235	95	484	87	3145	4157	49590	553	751
Cd8a	MGLibA_09259	GCCCACCTTCGTTGTCTATA	4829	1602	145	187	1519	178	159	1810	330	642	109	702	631	446	8	60	245	272	196	173	198	15	1605	78	89	370
Cd8a	MGLibA_09260	ACCCTTGGCCGGAATCTGCG	3392	807	3	19	5	52	11	11	20	31	10	14	2	10	28	4	14	7	10	15	2	5	2	2	8	8389
Cd8a	MGLibB_09258	CAGAAGGGCCACGCAGATTC	2336	695	23	145	13	11	9	8	53	0	23	4	15	7	4	0	0	8	3	1	0	0	3	1	14	0
Cd8a	MGLibB_09259	GGGAGTTCGCAGCACTGGCT	1651	396	1270	200	37	17	333	20	1503	148	97	1965	110	21	7	14	553	107	1647	3	14	1656	21	61	39	12
Cd8a	MGLibB_09260	GAGCACCTAACCTGAGCCAC	2432	840	13	46	7	13	7	5	235	0	227	36	4	9	1	6	1	4	0	5	35	58	33	6	13	2
Cdc5l	KY014917	GCTCCGAGTACCTGAGGCGC	2150	35	0	26	1	0	0	0	0	1	0	1	0	0	0	0	1	4	0	0	1	0	0	0	0	0
Cdc5l	KY014918	CCGGCCTGACCCGATAGACA	2998	254	0	0	0	0	7	3	0	0	1	0	0	1	0	4	1	0	0	3	0	2	2	0	0	0
Cdc5l	KY014919	TCTTCCTATGATCGGAGCAA	2810	134	0	0	0	0	0	0	0	0	1	0	0	2	0	0	1	0	2	0	0	0	0	1	0	0
Cdc5l	KY014920	AGGACCATTGCTCCGATCAT	2697	169	0	96	1	45	1	3	44	0	2	2	153	2	3	0	6	0	0	0	7	17	169	0	4	0
Cdc5l	KY014921	TTGCCTTTAATAGGTACGAA	1188	204	0	0	0	0	1	2	9	0	0	2	0	24	3	0	6	2	5	0	0	1	0	0	0	0
Cdc5l	MGLibA_09372	CTTTAATAGGTACGAATGGC	1694	181	0	0	7	0	0	9	0	1	0	0	3	0	0	0	0	0	0	2	0	0	0	0	0	0
Cdc5l	MGLibA_09373	CAAGGGACAAAACTGCCCAA	865	144	13	3	183	42	53	12	2	2	24	837	122	9	0	0	16	0	0	3	0	0	1	1	11	6345
Cdc5l	MGLibA_09374	ACTCATAGTGTTCCAAGCAC	2342	84	0	1	19	0	0	1	14	0	1	1	1	0	0	0	0	0	0	0	0	0	0	0	0	0
Cdc5l	MGLibB_09372	TCACCCTCATCCATGTCTAT	5872	1272	163	338	290	57	98	129	36	49	83	121	152	118	1	1	55	49	25	4	59	9	11	15	108	36
Cdc5l	MGLibB_09373	TGAACTTGAGATGCTCTCCG	3524	35	0	0	0	0	0	0	0	0	0	0	0	0	0	0	0	0	0	0	0	0	0	0	0	0
Cdc5l	MGLibB_09374	GGATGAAATTCTGAAAGCAG	757	13	0	1	0	0	0	0	0	0	0	0	0	0	0	0	0	0	0	0	0	0	0	0	0	0
Cdc73	KY014933	TCCAAGTAGATCTTTTCGGT	2170	230	0	21	0	0	18	1	7	1	88	6	0	76	0	0	0	72	0	0	0	35	2	0	0	0
Cdc73	KY014934	CCAAGTAGATCTTTTCGGTC	2054	276	0	2	17	34	0	16	25	6	2	4	1	2	0	0	4	1	0	0	0	37	0	0	5	1
Cdc73	KY014935	GCTGCACGCCGGACATAAAC	373	56	0	0	0	1	1	0	0	0	0	2	0	1	0	0	0	0	2	0	2	1	0	0	3	0
Cdc73	MGLibA_09378	CCCGACCGAAAAGATCTACT	1565	296	11	76	0	11	37	3	11	5	16	5	54	6	0	5	279	10	1	31	1	56	49	5	109	92
Cdc73	MGLibA_09379	AGTTCTATTACCTCAATCCG	2422	123	0	1	2	3	0	0	0	0	0	5	0	0	0	0	0	0	0	7	3	0	2	0	1	2
Cdc73	MGLibA_09380	TTCTACTTACAGCTGCACGC	6829	320	0	1	14	36	0	6	7	4	65	0	3	20	0	0	27	0	0	0	0	7	2	1	3	108
Cdc73	MGLibB_09378	GCGAAAGGTGCACATTATTA	1970	353	1	86	203	6	422	4	17	10	10	10	323	8	159	866	11	5	2917	13	18	9	5	2	7	3
Cdc73	MGLibB_09379	CCGCTGAAGACCTATTTCCA	2011	163	0	0	85	2	0	11	0	0	41	3	30	0	0	0	0	0	0	1	0	3	2	0	0	0
Cdc73	MGLibB_09380	CAACATCAGCAAGCATAGAC	1476	570	3	115	17	57	132	42	3	15	53	39	37	159	1	0	0	2	2	7	0	17	1	0	0	0
Cdk9	KY015234	GGTTGGTGTATCGGTTGGGC	2770	273	1	0	0	110	62	2	5	0	4	32	48	4	0	1	0	0	0	1	0	4	4	0	1	0
Cdk9	KY015235	CTGCCCTTGCAGCGGTTATA	36	6	0	0	0	0	0	0	0	0	0	0	0	0	0	0	0	0	0	0	0	0	0	0	0	0
Cdk9	KY015236	CTTGCAGCGGTTATACGGTG	684	11	0	0	0	0	0	52	0	0	0	0	0	0	0	0	0	0	0	0	0	0	0	0	3	0
Cdk9	KY015238	ATTGAGATTTGTCGGACCAA	1478	180	13	0	181	0	5	0	0	0	107	0	5	20	0	0	15	1	0	0	0	0	1	10	4	1
Cdk9	MGLibA_09573	GACATTGTGGTACCGGCCTC	3411	908	11	17	36	25	4	61	19	2	35	13	17	17	44	7	17	19	0	0	4	2	5	0	1	2
Cdk9	MGLibA_09574	CTCACCGTATAACCGCTGCA	4675	298	1193	0	5	4	144	10	0	0	4	0	18	4	1	18	3	16	0	0	0	76	3	5	0	2
Cdk9	MGLibA_09575	TGGGCTGGCTATTCTTAGCT	1293	30	0	0	0	0	0	0	0	0	0	0	0	0	0	0	0	0	0	0	0	0	0	0	0	0
Cdk9	MGLibB_09573	CTTTCTTCAGAGCCACCTTC	5039	519	44	84	11	15	15	37	42	409	42	14	408	81	2	13	11	0	55	10	3	4	8	51	10	2
Cdk9	MGLibB_09574	TGGTCCGACAAATCTCAATT	2828	311	1	5	10	0	2	0	1	42	1	56	1	0	0	14	6	8	0	0	0	6	0	2	2	1130
Cdk9	MGLibB_09575	AGTTCCCCATCACAGCCTTG	2825	180	1	32	16	10	82	2	61	4	3	2	52	0	0	0	0	0	9	0	0	0	1	0	0	1
Cdyl	KY015382	GGTGCGGAGCGAGCCAGGAT	998	569	4	19	20	20	21	12	2	18	89	1	30	3	3	0	6	2	3	1	2	2	86	1	10	0
Cdyl	KY015383	TTTGCCTCTCGTTGTGGCGC	8979	2835	67	265	267	216	148	129	88	10	144	107	127	59	15	21	16	4	9	10	5	26	45	2	4	15
Cdyl	KY015384	AATCTGCTTCCGGGCGTTGC	3083	460	16	80	21	100	7	3	38	15	535	5	33	0	5	1	143	0	148	7	2	0	4	0	10	0
Cdyl	KY015385	CCGAGGTCCTGCCCTTAACG	5759	1344	52	276	951	417	205	94	306	23841	154	880	867	178	153	12	149	15087	182	334	12	30	11	8	18	234
Cdyl	KY015386	TCCTGGCTCGCTCCGCACCA	8243	2365	37	174	304	254	314	203	560	86	128	8	34	715	9	58	195	31	8	1423	21	123	87	5	3	62
Cdyl	MGLibA_09675	CGTGCCTAAGAGCCCCGTTA	3338	662	16	174	380	46	17	78	120	7	177	91	172	191	35	8	1	1	0	3	45	3	0	7	5	2
Cdyl	MGLibA_09676	AAACGCAACCGCTTGTCAAA	1451	218	11	8	2	63	9	0	154	3	184	44	5	0	0	2	1	0	5	0	0	0	0	0	3	0
Cdyl	MGLibA_09677	CAGAACCAGCTTGCTGTCGT	2976	1045	54	342	567	1613	392	288	277	937	232	135	57	183	20	25	15	69	25	50	12294	132	10	24	342	2339
Cdyl	MGLibB_09675	TCCTCGGCACCCTGATCCAC	6265	1947	39	52	90	1377	686	1209	4977	171	74	22	1223	1985	127	0	25	207	4	24	77	250	28	194	124	9
Cdyl	MGLibB_09676	TGCAGCCGACGACAGCAAGC	2382	607	17	7	0	6	10	10	9	532	37	15	269	10	6	0	0	6	4	1	3	1	11	2	0	1
Cdyl	MGLibB_09677	AGATGCTCCTCCCATAATCT	2808	686	42	0	1	9	25	12	8	19	12	7	29	134	4	5	628	3	40	1	8	4	0	0	100	11
Cdyl2	KY015387	GTGGGTCCCGTCGCAGTCAC	3531	1089	9	62	583	13	9	174	16	22	26	54	393	11	6	8	3	1	23	916	1	48	11	2	5	9
Cdyl2	KY015388	GTTGACGCGCTTCCGCTTGT	6066	1653	22	26	74	142	90	31	43	69	490	21	941	52	3	2	9	38	84	8	24	15	18	8	5	7
Cdyl2	KY015389	CGGGACCCACTCCGCGCTGG	2821	702	1	8	24	7	68	331	32	10	2	1	4	1	12	0	2	0	4	0	111	2	94	7	0	0
Cdyl2	MGLibA_09672	AGTTTATCGACGAGTTCAAC	1728	221	1	1	0	4	1	53	2	162	9	3	12	1	0	0	0	20	0	1	0	0	0	1	7	9
Cdyl2	MGLibA_09673	CGGGTCCCATCAGCCGGATC	3512	997	152	154	5	47	142	85	121	149	207	100	1444	664	11	1	36	347	95	14	0	2	8	5	100	9
Cdyl2	MGLibA_09674	CGCTGGACAGCCGGCCGATC	3536	1313	177	485	853	1878	1309	237	1487	62	7936	478	580	3644	27	84	78	285	23	1487	1353	82	1333	5	263	963
Cdyl2	MGLibB_09672	ACCATCCGACTCACGCCTGC	5016	1078	14	101	58	582	67	243	71	22	994	13	5	159	9	49	13	40	12	1	30	89	9	1	1	4
Cdyl2	MGLibB_09673	CTCGAATCGCAGAAGCTATC	2298	489	6	134	64	27	79	1	51	27	6	9	36	489	0	14	3	15	8	10	1	123	23	6	3	11
Cdyl2	MGLibB_09674	CCCATTAATGGCTACCACGA	3444	888	24	507	139	23	80	63	11	38	196	145	91	12	6	9	23	5	1	1	1	4	162	6	25	11
Cecr2	KY015487	AGATATCATTAACTACCGTT	1911	219	1	0	0	4	0	6	4	0	0	2	0	0	0	0	0	0	1	0	24	0	3	0	0	0
Cecr2	KY015488	CATTTTCTGTAGGATCCCGA	3187	444	6	3	26	6	92	38	5	1	53	115	43	3	3	14	1	5	3	13	3	318	0	2	174	1
Cecr2	KY015489	TCATTATAGATCGAGCTAAG	1941	510	38	13	46	97	121	5248	547	34	83	53	1660	191	1481	14	28	832	15	27	97	64	286	186	10	2
Cecr2	KY015490	CCTCAGGGGACGATCAGAGT	2291	461	1	0	4	6	0	120	0	1	10	1	11	2	8	0	2	0	16	1	1	0	1	0	0	0
Cecr2	KY015491	GAGGCAGCTCGGCGTGCCGG	2891	855	35	118	29	68	30	1	21	10	77	1022	41	46	290	2	10	9	0	7	2	13	5	22	59	15
Cecr2	MGLibA_09741	ATCTCTACTCGAGTACGCAG	2461	425	24	95	8	2	12	60	2	26	44	0	4	449	4	5	38	26	0	0	100	1	14	1	7	2
Cecr2	MGLibA_09742	AAGATATCATTAACTACCGT	1261	132	11	0	0	0	0	0	0	1	0	1	1	3	0	0	170	2	0	1	0	0	0	0	13	0
Cecr2	MGLibA_09743	TCCAAAGCGAAAAAAGCTAC	427	69	0	0	0	0	0	0	0	0	0	0	0	0	0	0	0	0	0	0	0	0	1	0	0	0
Cecr2	MGLibB_09741	ACAATTCAGGTGCACTCTAC	2906	799	15	51	188	147	39	12	79	27	101	29	91	177	50	11	75	29	6	26	1	29	12	2	39	2
Cecr2	MGLibB_09742	GCACAAGGAGAGTTCTCCAT	2714	623	240	98	77	6	100	189	764	305	7	255	196	145	9	9	326	13	9	1	907	38	1408	3	3	28
Cecr2	MGLibB_09743	AGCTCTTCACAGAGATGACG	847	121	0	1	0	5	850	3	1	98	15	1	0	41	0	0	6	1	57	0	1	2	1	1	1	2
Chaf1a	KY015956	TGTGGTCATTATCGACCTGA	4068	799	10	83	2	33	0	11	2	3	1184	5	268	9	0	0	10	0	66	10	1	2	1	3	13	1216
Chaf1a	KY015958	TTGGGAGCCTGCGGAGTCTT	2904	518	12	67	26	1113	27	33	24	34	133	7	26	278	62	0	3	8	5	225	22	16	15	13	4	17
Chaf1a	MGLibA_10113	GGAAGAGATACGACGAGCCA	608	38	2	0	19	0	0	2	0	0	1	532	0	0	0	0	0	0	110	0	1	0	0	2	6	0
Chaf1a	MGLibA_10114	GGAAAAACGCAAGGAGCGGC	594	34	2	0	0	0	0	0	3	0	0	0	0	0	0	0	0	0	0	0	0	0	1	0	0	0
Chaf1a	MGLibA_10115	ATAATGACCACACTCGGTAC	2072	413	6	4	0	0	5	2	4	0	25	2	0	0	0	0	5	0	0	1	1	2	0	0	0	3
Chaf1a	MGLibB_10112	TGCCCTCAAGAAGCTATCAA	1760	542	5	11	281	9	29	24	5	3	18	14	106	6	64	0	2	2	0	0	0	1	4	0	0	4
Chaf1a	MGLibB_10113	GTGGATTGCAAAGACAGACC	1019	321	0	85	9	188	4	5	14	1	18	0	3	0	1	0	0	1	0	2	0	0	0	0	6	0
Chaf1a	MGLibB_10114	CCAGTGAAGAGGTTAATACA	1666	694	30	294	111	260	465	413	1077	70	156	88	515	51	9	2	36	20	16	9	12	21	29	31	28	32
Chaf1b	KY015959	CGGGGGTGGACACCGCCGTC	1678	545	55	25	25	120	13	12	32	19	37	18	8	988	3	1	55	8	2	0	5	0	2	5	33	0
Chaf1b	KY015960	GGGGGTGGACACCGCCGTCA	4	46	0	1	1	0	1	6	3	0	0	0	9	0	0	0	6	0	1	0	0	1	0	0	0	0
Chaf1b	KY015961	CTGTCCATTTACCCTGACGG	5962	208	0	0	19	6	0	3	13	3	158	1	1	1	0	2	0	0	6	0	2	1	0	1	0	0
Chaf1b	KY015962	TTTGGTGTGTCGAGCAAGAT	2062	343	47	31	50	13	8	121	1	3	7	1	8	1	11	0	2	2	0	0	1	0	0	0	26	8
Chaf1b	KY015963	TGCTGTCGTCGTGAAACATC	3334	833	2	37	1	32	12	258	25	8	18	4	19	34	2	1	14	3	1	5	19	0	0	7	4	4
Chaf1b	MGLibA_10116	ATCATATGGGATGTCAGTAA	1750	95	1	1	2	19	0	0	0	2	0	4	0	0	3	0	0	0	0	2	0	5	6	23	0	0
Chaf1b	MGLibA_10117	GTCGCAATATATTGACCCAA	1252	73	2	0	0	0	0	0	0	0	3	0	0	0	0	33	17	0	0	0	0	0	0	2	0	0
Chaf1b	MGLibA_10118	GCGTACAACATTGACAGCTT	1506	24	3	0	0	0	1	0	0	0	1	0	0	0	0	0	0	0	0	0	0	0	0	0	0	0
Chaf1b	MGLibB_10115	GATGCTAAAATCTCCCCAGT	1094	48	0	1	0	2	0	0	0	0	0	0	1	0	0	0	0	0	0	0	0	1	0	0	0	0
Chaf1b	MGLibB_10116	CGCAGCTGAATAAGGAGAAC	1098	37	0	1	16	0	0	0	0	0	1	0	0	0	0	0	0	0	0	0	0	0	0	0	0	0
Chaf1b	MGLibB_10117	CAGATGCCGTCATTCTGTTG	5220	419	1116	703	368	2847	169	825	1217	1368	261	139	169	618	250	52	4052	134	17	64	1941	47	35	105	9	46
Chd1	KY016004	TCGGCTCCGTCGACTTTTGG	4951	1023	4	21	63	41	31	8	57	191	116	14	132	42	0	9	21	0	15	2	8	12	2	3	5	55
Chd1	KY016005	TTTGTTTTTCGGCTCGTAGT	3398	617	14	34	37	76	395	20	15	53	105	32	52	55	1	2	233	4	5	7	0	6	3	3	28	50
Chd1	KY016006	TAAATTTTAACCGTTTGGTC	1877	315	1	20	7	3	17	9	77	5	8	9	9	20	0	3	0	0	0	1	0	13	8	1	0	0
Chd1	KY016007	TAGCACTTAATCCGTAGTAG	2092	415	10	3	17	40	32	33	0	0	74	2	78	0	0	0	3	2	2	3	0	1	1	2	4	0
Chd1	MGLibA_10152	GACTCCGACGACTCGTCCAG	2759	699	7	22	12	78	8	2	7	13	6	3	3	366	1	0	3	2	0	7	0	2	3	0	0	0
Chd1	MGLibA_10153	ACCTCGGCTCCGTCGACTTT	5238	858	8	133	68	28	208	16	153	20	59	206	1817	10	22	794	5	3	0	8	15	8	13	39	48	0
Chd1	MGLibA_10154	CGCCCAGCTTCATCTAATAG	2670	756	15	95	18	4	3	5	399	5	146	26	38	3	3	1	4	2	0	4	2	6	11	4	2	3
Chd1	MGLibB_10151	GATCCACTATTAGATGAAGC	1145	65	2	0	2	0	0	0	7	0	0	0	0	0	0	0	0	0	0	0	1	0	5	0	0	0
Chd1	MGLibB_10152	GTCGTCGGAGTCTTCACTGC	5009	861	23	20	76	264	37	4842	7	23	25	21	25	12	0	2	8	6	2	5	31	3	15	0	0	4
Chd1	MGLibB_10153	GCAAAACCACCAAAAGTCGA	1152	216	1	4	1	14	16	12	0	2	2	0	1	0	0	0	0	0	3	0	0	0	0	0	0	0
Chd1l	KY016008	AGGCTACAGCTACGAGCGTG	1965	457	55	99	125	12	88	21	10	42	5	49	30	752	1	2	13	2648	1	1	6	5	10	2	4	12
Chd1l	KY016009	CACTCACCATCGAACAGATA	2235	568	0	6	34	24	25	10	5	5	2	0	2	3	0	1	0	0	0	4	0	5	4	0	0	0
Chd1l	KY016010	ACTCACCATCGAACAGATAC	1798	427	6	7	1365	26	353	22	14	1	7	6	11	7	1	3	4	66	1	311	4	0	3	13	3	9
Chd1l	KY016011	AGAACATCCTGACGCAGCTT	2140	415	18	13	0	2	1	74	10	0	59	1	4	9	0	0	0	0	0	1	1	2	2	0	0	2
Chd1l	MGLibA_10149	CGTGCTGCTGACGACATACG	4948	1016	97	10	28	77	14	12	10	57	18	15	61	476	0	1	0	0	2	6	1	1	49	2	5	5
Chd1l	MGLibA_10150	GTCTCCCCACCAAGTAAATG	1538	421	294	6981	28	268	77	38	269	6	74	298	18	32	6	7	20	117	7	62	8	3	12	30	88	90
Chd1l	MGLibA_10151	TCGTCTACGTTCTTACCAAC	2735	780	2	6	668	35	21	58	16	1	6	4	7	12	0	0	1	2	13	3	2	1	0	1	95	1
Chd1l	MGLibB_10148	TATCGCTCTCCTCATTTACT	6783	2109	17	720	347	537	392	675	1735	230	816	59	183	530	393	49	83	89	53	158	7	60	221	23	267	29
Chd1l	MGLibB_10149	GTCACCTGTGTATGTCACAC	3827	838	27	66	77	173	29	51	75	110	218	19	26	116	53	2	6	10	42	4	12	14	20	8	619	17
Chd1l	MGLibB_10150	CAGTGCTTCCATTGCCAGAA	2258	621	98	3111	146	2440	1573	4061	159	52	684	398	5403	285	20	20	36	25	142	41	628	85	34	57	159	152
Chd2	KY016013	TGGCTTCCTTAATATCGTGA	4993	529	900	12	379	11	8	5	108	13	8	346	54	21	3	1	17	519	6	1936	8	233	1	29	31	4
Chd2	KY016014	TTTTTCACTTTAGACCGTGC	4896	857	20	65	38	65	131	728	37	16	34	42	17	8	4	1	9	1	0	0	4	1	0	1	14	5
Chd2	KY016015	CAGGTAGGAGAGAAACGATA	792	90	15	41	0	9	0	0	0	0	0	0	1	19	4	3	0	0	6	0	0	0	35	0	0	0
Chd2	KY016016	GGAAGCTGTCGATACAATTC	1665	588	12	8	54	4	3	5	9	1	0	28	24	225	0	0	8	0	217	1	0	1	3	2	7	0
Chd2	KY016017	AAGCAACCTAAGATTCAGCG	1105	48	0	20	1	2	4	0	3	0	0	0	11	5	0	0	0	0	0	0	0	6	0	0	0	6
Chd2	MGLibA_10155	ACCATCACGATTTAATGTTA	2310	454	0	40	55	272	314	3	51	0	46	1	4	38	0	0	10	0	2	3	0	1	0	0	3	0
Chd2	MGLibA_10156	TCCTTAACATTAAATCGTGA	1879	596	25	1102	33	7	235	15	40	38	82	18	46	23	3	0	8	0	93	1	2	6	13	12	14	13
Chd2	MGLibA_10157	CAGCGAGTCCAATAGCAGTT	2336	572	3	102	946	72	7	19	36	3	14	7	22	16	0	1	7	19	4	4	7	1	0	3	34	3
Chd2	MGLibB_10154	CTAGAAGACCGGTCCCTAGA	1682	357	513	121	460	1953	1494	86	39	82	3552	1061	131	118	122	1453	1420	98	80	1667	71	199	973	49	5	270
Chd2	MGLibB_10155	AGAAGACTCCGAACTGCTAT	1123	181	0	5	2	7	0	11	3	0	0	0	0	0	594	2	0	3	0	0	2	0	2	0	0	1
Chd2	MGLibB_10156	CCACACTGAAGGCAAGTAGC	2082	409	71	10	11	7	3	3	2	1	20	135	0	10	0	0	8	0	6	1	2	0	0	0	0	1
Chd3	KY016018	GCCAAGCGCCGCCTGATCGA	2852	435	2	2	239	2	8	0	0	202	5	151	33	67	0	0	0	0	0	0	0	3	1	7	0	49
Chd3	KY016019	CTACCGTTTCGGCATCAAGC	2129	454	7	21	0	1	0	47	8	8	151	28	23	2	4	862	3	2	7	0	25	2	4	8	0	36
Chd3	KY016020	TAATGTACCGAAACTATCAA	1456	573	4	17	3	8	0	6	10	0	6	33	3	43	0	2	2	2	1	1	0	0	12	14	1	0
Chd3	KY016021	GCCTTGACCCCGAGCTTGAC	4668	883	867	86	20	28	935	75	42	466	21	3001	118	0	1	50	5	0	190	9	20	130	8	128	21	83
Chd3	KY016022	GCAGCTGCCGACCCTTTGAA	1592	359	2	1	1	9	4	15	6	0	1	7	2	0	0	0	5	5	4	0	0	16	238	3	273	3
Chd3	MGLibA_10158	GGTGTGAAGAAGCGAAAACG	564	63	0	0	0	0	0	0	1	0	0	0	0	0	0	0	0	0	0	4	0	0	0	0	0	0
Chd3	MGLibA_10159	TGTGGAACACGTGTTCTCCG	2424	595	916	168	18	31	4	13	11	44	18	1813	879	1	1	8	6	0	20	10	8	4	9	13	20	1
Chd3	MGLibA_10160	CAGCTGCCGACCCTTTGAAG	4030	783	253	63	3	252	78	1171	374	35	16	62	56	99	74	73	39	19	3	5	47	27	13583	150	14210	80
Chd3	MGLibB_10157	GCCACCCCCATAGCACCATC	6125	1995	84	150	268	347	87	110	732	19178	152	339	555	144	7371	139	32	113	1438	6	7	121	205	18	598	197
Chd3	MGLibB_10158	ACGAGCTTCTTCCGTTTCCT	3868	1031	12	253	73	532	124	38	15	4	25	796	49	80	22	6	8	2	0	1	0	11	4	1	10	38
Chd3	MGLibB_10159	TTCCTTCTTCGTTTCCGACC	8771	2148	916	266	286	65	321	71	265	92	66	162	2518	117	704	131	3152	21	168	20	4	109	84	11	73	14
Chd4	KY016023	TTGGTCTTGGCCTTGCGGAT	3902	695	141	779	12	10	93	774	708	10	13	1	103	250	3	4	29	0	2	27	226	81	0	0	8	1
Chd4	KY016024	GGCACACCTCGCAATAGTCC	3929	835	31	75	172	15	89	80	197	41	45	467	227	23	22	19	20	0	4	69	3	27	24	0	27	18
Chd4	KY016025	GACAGAGCCATTCGCCGTTT	2801	524	0	6	0	1	13	1	44	0	33	3	5	8	1	2	1	3	0	0	0	5	0	0	0	4
Chd4	KY016026	CCTCCAAGGGCTTGGGCGAC	2366	874	15	51	35	992	131	24	122	18	10	19	80	3	13	5	68	3	770	3	18	3	150	597	3	1
Chd4	KY016027	CAGAGGAGCGCTCACTAAGA	1348	122	0	0	0	3	0	0	0	0	0	0	1	0	0	5	0	0	0	0	0	0	0	0	0	0
Chd4	MGLibA_10161	GCTTCGGATAAATCCTCGTC	3874	759	37	197	141	1226	14	36	308	241	918	10	18	251	1	21	145	62	10	10	59	31	117	6	30	16
Chd4	MGLibA_10162	TCGGACCCTCACCAACTACA	3891	710	0	21	6	15	5	236	14	118	367	216	2	7	52	8	641	0	2	27	1	12	90	2	35	4
Chd4	MGLibA_10163	TCCTGACTTACCTAACAAAT	2016	478	3	38	11	27	2	7	2	0	123	1	0	20	0	0	3	0	1	1	0	1	0	0	0	1
Chd4	MGLibB_10160	TTGCGGATCGGCACCTCCAC	7480	2042	181	69	199	283	1346	16	2313	127	63	294	58	838	4	4	24	15	59	8	51	122	51	8	87	10
Chd4	MGLibB_10161	TAAGAGCAAGCGCCAAAAAA	540	29	1	1	0	0	1	0	0	0	0	0	0	0	0	0	0	4	0	0	0	0	0	0	1	0
Chd4	MGLibB_10162	GGCTCTGCGCTCAGACAGTG	3373	192	1	1	528	4	4	0	4	5	5	2	45	0	0	7	0	0	0	13	1	0	0	6	1	3
Chd5	KY016028	AGCGCCAACAACCCGTTTAA	1513	317	40	5	283	131	5	930	4	10	77	5	8	231	0	0	4	0	2	5	0	25	1	0	0	4
Chd5	KY016029	TGAACTTTGCCCTTCAGCGG	2926	470	45	135	6	71	275	242	2945	0	484	321	50	23	23	131	361	269	2022	100	98	2474	2	908	912	542
Chd5	KY016030	TCCACGATGGGCGTATCGGG	2988	915	30	80	17	28	48	75	25	35	75	40	789	61	78	16	3	65	2	304	3	9	0	18	3	60
Chd5	KY016031	TGGTACATCGACGCCACAGG	2184	537	13	0	0	1	11	3	35	0	32	11	0	195	0	0	0	0	0	1	1	1	2	29	0	2
Chd5	KY016032	GAGGACAACGCCATTCGCGG	1845	661	16	57	1360	24	32	90	10	527	110	78	27	171	8	2	3	1	116	75	74	3	43	3	200	1167
Chd5	MGLibA_10164	ATCTCCTCCGCGAACAGCCG	2971	565	189	33	20	23	56	29	387	4469	11	264	12	150	20727	239	14	86	3150	31160	2133	2259	7138	49	11	104
Chd5	MGLibA_10165	CTCCGCCATGAGTTGTCCCG	4316	1014	112	299	5	120	79	104	150	19	55	165	36	603	65	1	401	4	4	8	20	57	167	43	100	19
Chd5	MGLibA_10166	GACAACTCATGGCGGAGTGG	1645	866	23	23	62	259	2	19	64	41	7	212	59	61	4	0	6	31	1	0	1	8	4	16	6	2
Chd5	MGLibB_10163	TGACGAGATGTCAGACAACG	1556	404	0	0	0	6	0	17	70	18	0	0	1	0	0	0	0	1	0	1	0	0	2	0	2	0
Chd5	MGLibB_10164	GCCGGGCATGCGGGGCCCGC	4868	1558	26	61	380	185	60	474	37	176	103	254	162	53	17	79	19	114	11	6	7	23	32	2	68	22
Chd5	MGLibB_10165	AAAGAGAGCAAGTCCTCCAA	1045	198	1	7	2	0	1	9	2	7	0	0	0	0	2	0	0	5	0	0	0	0	1	0	0	2
Chd6	KY016033	CTCGGAAGCACTCAGCGCGG	1769	661	10	30	2	99	15	5	20	52	33	2	4	4	4	0	0	44	1	41	12	0	21	4	0	6
Chd6	KY016034	TTATGGGGCTTTAATGGACG	1903	354	1	63	12	8	5	3	18	3	10	184	328	3	0	0	0	0	0	7	1	0	8	0	11	0
Chd6	KY016035	CTCCCCAAGCTCATTGCCGG	4974	1208	46	1134	40	189	39	67	145	6	556	210	294	36	29	2	36	5	24	9	16	37	212	14	11	4
Chd6	KY016036	GCCAGTTCATCCCCTCGAGT	4059	1245	2239	64	59	355	1588	824	7666	43	2647	194	53	12367	6	99	3	28	175	14	2457	587	886	19	11	552
Chd6	KY016037	TAGAAAAGCTCTAGGTCGAA	411	78	0	0	0	0	0	0	0	0	0	0	0	0	0	0	0	0	0	0	0	0	0	0	0	0
Chd6	MGLibA_10167	GTTCTGCAGAAACGGCGCTC	1474	193	34	0	138	6	1	0	4	31	1	2	5	0	0	6	0	5	0	1	0	1	0	0	0	0
Chd6	MGLibA_10168	CTTATGGGGCAGACAATGAT	1755	371	8	3	9	2	264	4	19	78	17	2	2	1	129	0	1	140	482	0	1	5	1	20	85	5
Chd6	MGLibA_10169	CGGAGGCCTCCCGGTGCTTC	915	199	0	7	0	7	1	2	1	0	0	0	1	0	0	0	0	0	0	0	2	0	0	0	0	0
Chd6	MGLibB_10166	ACCGACCTCCTGGACAGTCT	2927	581	44	35	21	37	19	8	33	24	24	11	9	10	43	0	9	2	2	9	79	20	2	34	0	13
Chd6	MGLibB_10167	GGGCTGTACCTCAGCCTGCC	3207	1070	18	12	47	47	25	33	29	6	463	61	140	75	1	14	2	8	18	5	1	10	64	3	8	2
Chd6	MGLibB_10168	ATGTCTTGTAGCAGGGAGCA	2116	625	16	308	142	760	48	13	15	2569	19	400	29	14	732	8	3	0	1	0	1	6	11	13	1	4
Chd7	KY016038	GAGACGCCAATCCGTTCCCG	2034	678	2	5	0	37	3	3	91	3	5	52	14	9	13	0	7	0	0	0	0	0	4	20	0	0
Chd7	KY016039	GGCATGTGCGACAGGTGGCC	2692	637	7	4	0	7	17	3	12	109	2	2	9	5	15	0	21	2	6	1	256	13	3	3	0	5
Chd7	KY016040	GCTGCTGCTCTATCGACGGC	2351	577	176	8	20	12	3	165	4	1	506	175	4	5	2	0	2	734	6	3	3	9	119	1	17	5
Chd7	KY016041	AAGGGAATTCCGAACCTGGA	839	338	13	31	2	38	27	25	3	10	16	11	96	72	0	1	2	3	3	1	3	2	11	4	45	2
Chd7	KY016042	CGGCCATCAATCCTTTCGTA	4217	1243	16	449	296	307	194	581	763	13	49	12	51	30	0	0	14	9	20	3	1	25	6	14	39	8487
Chd7	MGLibA_10170	GAGCGTTCTGTGCGCTGACC	4822	1759	343	78	580	46	83	132	198	53	79	548	130	40	5	8	6	94	8	1	28	15	9	11	22	21
Chd7	MGLibA_10171	GAAGGTCAAAAAAGATCCGA	522	70	0	0	0	0	0	0	0	0	0	0	1	0	0	0	0	0	0	0	0	0	0	0	5	0
Chd7	MGLibA_10172	ACCGTCCCCCGCTCCTGAAG	4099	745	41	25	63	310	25	5	27	2	102	1040	40	14	234	5	8	1	1	9	1	17	9	35	87	12
Chd7	MGLibB_10169	TGTAGAAGAGGCGGTCCAGC	3269	949	9	59	270	25	43	49	270	149	2561	45	13	17	4	3	9	12	5	6	1	3	62	8	3	4
Chd7	MGLibB_10170	CAGCCGCCTAGTGAAAAAGC	1071	326	24632	25	33	330	820	70	246	22	155	209	731	35	28	0	0	10	704	6	3	9	391	316	2	1
Chd7	MGLibB_10171	GAAGCGATACACTGAAGATT	1241	385	61	1	0	9	0	2	1	1	128	4	0	2	1	0	0	0	0	71	2	0	0	0	0	26
Chd8	KY016043	CAAGCACGTTGTCATCGAAT	3001	461	8	2	6	41	8	9	17	45	20	18	16	13	3	0	37	5	0	2	0	19	0	0	0	2
Chd8	KY016044	CAGGCTATGGTTCGGTCAGC	2838	665	61	5	15	62	14	66	45	10	18	32	109	48	0	0	2	6	92	6	1	3	13	6	4	7
Chd8	KY016045	GTGGGCAACGATCTCCCAGC	2066	209	3	473	0	1	0	13	0	27	1	71	4	0	2	0	8	0	0	1	0	0	0	5	74	0
Chd8	KY016046	TATGCCTGCACAATCGCCCC	7605	1174	355	231	347	57	1015	46	156	116	56	16	331	210	845	31	325	6078	13	29	16	46	81	4	11	52
Chd8	KY016047	AGCTGTTTTACTGGTCGGCT	1127	174	4	0	0	0	0	0	0	2	0	0	4	13	0	0	3	0	1	2	2552	1	5	0	0	0
Chd8	MGLibA_10173	ATCGTCTGACAACTCTGACG	3481	543	70	0	11	75	18	123	5	32	8	19	86	7	26	5	0	12	0	0	2	5	7	0	2	0
Chd8	MGLibA_10174	TGAATCGAAACGCATCACTT	2552	361	33	46	28	3	11	110	100	19	20	6	24	110	12	9	20	0	4	6	1	27	4	1	6	5
Chd8	MGLibA_10175	GGACATCGGCATGTTGTGTT	4087	572	3	1	2	22	14	5	9	21	21	4	5	5	0	0	0	8	2	0	3	27	5	20	0	0
Chd8	MGLibB_10172	CATACCTCGAGTCCTGAATG	4192	523	4	372	3	24	5	206	14	7	99	4	23	10	96	21	8	3	13	3	2	2	7	4	417	6
Chd8	MGLibB_10173	TTATGCCTGCACAATCGCCC	5849	617	6	8	67	3	12	10	5	3	10	10	14	24	37	3	46	148	0	1	37	4	4	3	0	2
Chd8	MGLibB_10174	CCAGTCTTCCCTGCAGTATG	7495	1387	4730	12574	1942	3269	4520	765	2182	2532	5315	7108	773	6574	3864	113	1458	1901	718	454	3026	1018	361	1898	193	5526
Chd9	KY016048	TTCCCAGATCCTGTTGACGC	5342	1100	242	120	2016	212	311	842	275	181	769	39	288	615	47	269	36	160	1949	31	581	19	203	74	552	69
Chd9	KY016049	AAATGGTGATTCGTCAAATT	438	11	0	0	0	0	0	0	0	0	0	0	0	0	0	0	0	0	0	0	0	0	0	0	0	0
Chd9	KY016050	CTGGGACCTCTGCTCGGCAT	3517	1151	112	585	16	249	260	513	73	29	109	23	132	19	9	4	24	36	10	22	6	4	17	74	2	1372
Chd9	KY016051	CTTGGAACCGGTACGCTCCT	3606	1186	37	2345	9	75	173	1	42	5	112	121	146	27	55	2	9	2	63	13	11	1	29	56	7	5
Chd9	KY016052	AAAACGAATCGATCTGAATC	467	49	0	0	0	0	0	0	0	0	0	0	1	0	0	0	0	0	0	0	0	0	0	0	0	0
Chd9	MGLibA_10176	AGCTGTCCGATGCCGAGCAG	3913	645	376	13	17	89	7	265	1	6	19	27	5	13	20	0	0	3	8	0	0	2	152	6	1	55
Chd9	MGLibA_10177	CTCGGCATCGGACAGCTCAT	2154	600	290	31751	3369	22	58	60	5159	116	1036	51	396	667	37	390	86	14	17509	3036	129	31	44	13	269	141
Chd9	MGLibA_10178	TTCTCAGGGCTCATTACTCG	4568	1107	47	346	110	116	86	31	701	110	38	43	1618	163	1396	20	20	832	9	26	135	95	738	99	4	14
Chd9	MGLibB_10175	CACTAAGCTGCAGAATACCC	2809	781	8	325	33	51	5	13	2	14	17	21	6	89	27	0	0	1	0	1	0	4	0	2	5	0
Chd9	MGLibB_10176	GATCAAATCGACAAATTAAG	840	95	6	0	161	12	3	0	0	10	0	0	0	0	2	0	0	11	0	0	6	2	2	1	5	0
Chd9	MGLibB_10177	TAGACAAAATACTAGCTTGT	870	141	7	0	0	0	0	1	0	0	61	0	0	0	0	0	1	0	0	0	0	0	0	2	0	0
Chmp1b	MGLibA_10242	GCCGTCAGACTTGATCCCGA	3166	623	1	37	159	21	20	4	9	30	9	105	8	305	6	0	0	0	0	1	0	2	41	3	4	1
Chmp1b	MGLibA_10243	ACATCGTCGTGCGGCTTCGG	3449	644	74	128	51	16	9	64	163	6	11	76	11	50	29	0	0	0	0	1	178	3	8	0	19	11
Chmp1b	MGLibA_10244	GTTCTTTGGCCGCGAATTTC	2199	679	8	3	2	134	9	4	16	0	65	15	22	0	6	0	1	3	2	0	6	2	0	3	2	11
Chmp1b	MGLibB_10241	CGAACACCAGTTCGAGACTC	1586	248	1	108	1	59	1	0	0	1	2	3	1	1	0	0	0	5	0	0	3	0	0	1	0	1
Chmp1b	MGLibB_10242	ATACACAGTTACGCTAACTC	2431	538	966	63	388	23	34	10	30	7	65	10985	419	204582	5632	54	453	14	23	78	4	4933	14	25	5	352
Chmp1b	MGLibB_10243	CCGCACGACGATGTCCAACA	3361	952	22	251	16	3	24	11	2	6	70	2	8	23	9	2	22	4	1	1	3	1	24	7	2	1
Chmp2a	KY016156	AAACTTGCGTACATATCTCC	2596	30	0	13	0	0	0	0	10	0	0	0	4	0	0	0	0	0	0	0	1	0	0	0	0	0
Chmp2a	KY016157	CATATCTCCGGGTACGCACC	5098	252	0	3	9	1417	6	1	1	0	29	0	2	0	1	0	2	0	2	0	2	0	3	0	0	0
Chmp2a	KY016158	CAAAAGACCTGGTGCGTACC	2786	268	3	4	10	52	15	27	237	14	3	0	7	5	0	2	15	1	4	4	59	5	4	1	1	58
Chmp2a	MGLibA_10245	CAAACTTGCGTACATATCTC	1261	180	0	0	0	1	0	1	12	1	0	0	0	154	0	0	5	0	10	0	0	0	1	0	6	3
Chmp2a	MGLibA_10246	GCAGGATGCTGTTCGAATCA	2444	376	1	2	4	1	0	1	0	0	2	136	5	0	0	0	2	0	0	0	0	5	0	0	2	0
Chmp2a	MGLibA_10247	TCTGCAGACCTTCCCTCCAC	7081	1079	28	359	263	51	41	325	11	10	148	40	42	17	25	412	8	11	363	3	34	5	29	2	10	17
Chmp2a	MGLibB_10244	TAGTGATGCTGTTGTGTCCC	6951	1308	44	67	15	38	45	37	10	16	25	27	39	95	43	2	0	4	10	3	51	13	22	2	14	3
Chmp2a	MGLibB_10245	CACTTGACAGCTCATCTGTG	4306	65	0	0	0	0	0	0	0	0	0	1	0	0	0	0	0	0	0	2	0	0	0	0	0	0
Chmp2a	MGLibB_10246	GGCTCACTCAGTGTGGCAGC	2703	300	2	12	0	4	0	12	15	4	1	0	0	0	1	0	3	0	0	2	0	2	0	0	0	2
Chmp4b	KY016170	ATTTTTGGTGCCGTGCTTCT	5213	947	427	1624	185	161	145	53	73	186	83	404	1711	793	3418	24	31	17	11	12	5	32	50	14	1144	22
Chmp4b	KY016171	CGTCTCACCGCGTTTATTTT	3092	898	105	404	1457	1081	37	66	183	72	2728	243	1561	104	4	36	26	2	133	294	4	164	329	3	74	13
Chmp4b	KY016172	TGTCAACCATCGAGTTCCAG	3813	274	0	19	11	670	37	14	65	191	20	2	11	7	0	1	2	2	1	0	7	22	1	8	0	3
Chmp4b	KY016173	GTTGGTGTTGGCGTTCTCTA	2064	106	0	11	0	4	0	0	2	8	7	3	53	0	0	0	0	0	4	0	0	0	0	0	0	0
Chmp4b	KY016174	GTTCTTGAGCACCTCCGTGT	2503	62	71	513	332	165	198	785	17	36	23	6	210	15	25	11	14	252	35	55	17	7	51	8	1922	18
Chmp4b	MGLibA_10254	CTTTGGAGAAGAGTTCGACG	2047	262	0	6	1	2	5	2	1	1	1	1	0	4	0	1	0	0	1	2	0	0	0	0	1	0
Chmp4b	MGLibA_10255	GCATACTCACCGGGTTTGGA	1758	154	0	0	0	1	0	1	1	0	0	2	0	0	0	0	0	0	0	1	0	0	0	0	0	0
Chmp4b	MGLibA_10256	CTTCCCTCTAGCCGCCCTGC	5447	778	41	378	160	483	31	690	124	4	5	811	50	4	3	1	7	0	2	5	2	1	26	2	71	5
Chmp4b	MGLibB_10253	GCAGCACATACATGTTGTCG	1759	141	0	1	0	8	8	9	0	4	1	0	398	11	10	2	0	0	0	17	0	1	14	0	0	0
Chmp4b	MGLibB_10254	GTAGCCCTACCATCCAAACC	2378	176	0	0	0	0	1	0	0	1	5	1	0	1	0	0	1	0	0	0	0	0	0	0	4	1
Chmp4b	MGLibB_10255	CTGGAACAGTTACATGGATC	2168	309	8	9	25	93	248	191	16	1099	2	60	127	644	0	0	8	192	0	65	1	609	5	72	4	51
Chmp4c	KY016175	CGAGTTCCAGCGAGAAGCGC	1838	434	5	18	17	2	0	3	0	0	10	4	0	0	0	2	0	2	0	0	4	0	2	0	0	2
Chmp4c	KY016176	GGAGAACTCGCACACCAACA	1413	234	10	5	15	45	22	89	19	54	280	16	16	12	30	47	10	23	5	22	4	47	50	2	2	2
Chmp4c	KY016177	ACACCAACACGGAGGTCTTA	1237	419	0	15	11	114	3	1	1	5	28	45	7	0	0	0	1	1	0	0	0	2	6	1	171	1
Chmp4c	KY016178	CACGGAGGTCTTACGGAACA	2358	617	29	1625	2	253	7	158	210	7	235	590	110	166	18	0	13	19	331	0	2	1	20	0	3	1546
Chmp4c	KY016179	ACGGAGGTCTTACGGAACAT	1887	296	1	0	3	18	9	0	11	0	0	5	46	2	0	0	0	0	0	2	0	1	0	0	0	0
Chmp4c	MGLibA_10257	GTTCCGTAAGACCTCCGTGT	2201	350	49	22	308	0	57	2	0	3	0	0	99	19	0	0	0	0	1	2	0	0	1	0	1	33
Chmp4c	MGLibA_10258	ACCTACCTCATCGAAGCCAT	3516	582	16	144	775	36	374	101	26	52	297	95	117	137	39	93	7	4	3	12	22	272	2548	2153	34	253
Chmp4c	MGLibA_10259	AGTTCTCCAGCGCTTCTCGC	3411	539	4	3	55	3	61	36	41	22	43	165	1	64	31	0	5	123	2	0	2	38	2	3	195	8
Chmp4c	MGLibB_10256	GTTTGCCGATGGCTTCGATG	4645	842	3	1	27	20	444	56	1017	7	10	190	6	19	24	7	2	7	2	151	3	13	19	50	94	116
Chmp4c	MGLibB_10257	GGAACAGACCTGCTCGAGAC	1398	65	0	0	0	0	3	0	0	2	3	0	3	1	0	0	0	0	0	0	0	0	0	0	0	0
Chmp4c	MGLibB_10258	GCATGCCCTCCTCCGTGCAC	10112	2009	367	6651	313	2302	41	147	2281	55	4319	45	165	150	20	28	138	134	1747	129	105	97	836	688	65	2125
Chmp5	KY016180	TGACAAAAAGATTTCCCGGC	1147	91	3	6	0	0	0	1	0	0	0	0	0	0	0	0	0	0	0	0	0	0	0	0	0	0
Chmp5	KY016182	TGTTAAAGGACTGTTGGGCC	2386	354	7	26	7	4	56	0	0	4	15	1	92	3	0	1	1	2	0	0	10	2	2	1	0	20
Chmp5	KY016183	TATGGGGCATACCGTGGTCT	3940	906	16	1799	54	263	25	148	248	1544	62	124	162	9	8	77	2	3	7	9	25	7	26	1	21	4
Chmp5	MGLibA_10260	TGAGCAACAGCGAGACAACC	1499	262	0	0	1	2	1	0	0	1	58	0	4	1	0	0	0	0	0	0	0	0	0	0	0	0
Chmp5	MGLibA_10261	TCACTAGTTCAGCATCCAGC	2531	95	0	0	0	5	0	0	0	0	8	0	3	0	0	0	0	24	0	0	0	9	0	0	0	0
Chmp5	MGLibA_10262	TGCTGAACTAGTGAAATATA	1092	163	1	0	0	0	0	4	22	0	0	4	0	0	1	4	0	0	0	0	0	0	0	2	5	3
Chmp5	MGLibB_10259	TTAGGTTGATGCCATGAAGT	2541	257	0	28	0	1	0	11	0	0	1	0	0	2	0	0	0	0	0	0	0	0	1	0	60	0
Chmp5	MGLibB_10260	TTACACCATCCAGTCACTAA	2788	388	141	1285	24	136	316	114	16	18	98	49	5	75	1009	21	5	13	697	0	23	68	42	2	60	2
Chmp5	MGLibB_10261	GGAAATGAAGAAGGCATATA	554	59	0	1	69	0	1	0	7	70	1	0	0	0	0	2	265	3	2	0	48	0	0	0	0	0
Chrac1	KY016221	CGAGGTGTCGAGCATCAACC	3174	1814	400	5081	1537	1028	3717	281	283	1301	10883	696	913	1890	1071	215	14096	29386	66	236	1763	727	1722	124	1911	81
Chrac1	KY016222	GGTGTCGAGCATCAACCAGG	1087	111	2	0	0	2	1	0	0	0	0	1	3	2	0	0	0	0	0	0	0	0	0	2	2	0
Chrac1	KY016223	TGGTTGATGCTCGACACCTC	3596	875	1598	1397	11	654	1094	882	167	394	744	63	568	796	8551	504	1491	932	4265	12084	401	141	15486	490	27314	465
Chrac1	MGLibA_10299	GGGGCAATGACACGAGCCGC	932	147	0	0	0	1	0	7	0	0	1	0	1	1	0	1	0	0	0	0	0	0	1	0	0	12
Chrac1	MGLibA_10300	GACGCGGAAGATGGCGGACG	716	83	8	0	23	1	11	0	2	1	2	4	1	0	1	133	4	0	0	1	0	5	0	0	0	0
Chrac1	MGLibA_10301	GAGACACTTCAGTTTCTCGC	2215	446	2	126	5	52	6	4	2	6	5	4	20	0	0	0	1	2	1	0	0	0	3	1	0	3
Chrac1	MGLibB_10298	TTACTAGCTAAAATCTTCTT	1205	231	0	0	0	0	0	0	0	2	143	0	20	20	0	4	0	0	0	0	0	0	14	5	1	0
Chrac1	MGLibB_10299	AAGCGACCTTGGTGAAGCCC	2335	567	24	10	24	4	13	3	43	0	68	16	4	26	1	0	4	19	1	8	0	2	2	122	0	1
Chrac1	MGLibB_10300	CGACTTAGCCAGCACTGCAG	3138	781	13	10	38	34	20	19	19	4	45	1	217	3	0	3	222	1	64	20	3	2	12	2	2	4
Ciita	KY016487	GCTGAACTGGTCGCAGTTGA	2973	545	5	0	79	82	76	1	7	7	26	4	15	2	0	1	23	2	5	0	1	9	1	2	6	1
Ciita	KY016488	ACGGGAGGTCAGCGCAGGTT	2688	593	1000	384	537	13	182	0	35	91	1700	10	0	48	2	0	2	0	0	1	1	6	3	4	3	8
Ciita	KY016489	TCATTGCTTGGATCGTCCCG	9970	2260	53	609	110	3544	1223	157	503	2872	471	205	428	370	683	770	28	1048	50	30	2727	1124	563	78	1131	501
Ciita	KY016490	TTCCAGCGGAAGCTACTGCG	4027	779	611	2	315	344	32	31	247	138	75	7892	56	48	24	0	0	8	2	9	131	43	8	105	314	25
Ciita	KY016491	GACAGAGCAGATCCCGCAGG	1255	172	0	4	17	0	13	1	4	1	34	1	6	0	0	0	0	0	8	0	0	0	0	0	0	0
Ciita	MGLibA_10467	ACTGGATCAGTACGTGTTCC	2135	880	1969	35	169	21	8	123	20	51	40	102	845	83	3	2	16	127	21	12	2	31	163	0	2	3
Ciita	MGLibA_10468	GAGGAGATCGAACTCAGCTC	837	77	0	0	0	0	0	0	0	11	0	0	0	0	0	0	0	0	0	0	0	0	0	0	0	0
Ciita	MGLibA_10469	CCTGCAACAGCTTGCTGAAC	2861	839	1	12	1	73	46	7	2648	19	49	2	40	57	82	1	7	36	26	4	37	4	89	1	6	1
Ciita	MGLibB_10466	ATAGAGATCCCTGTAGAAGC	1023	98	0	2	0	0	0	0	0	0	0	0	2	5	0	0	0	0	0	0	0	0	0	0	0	0
Ciita	MGLibB_10467	CCAGTTCAGCAAGCTGTTGC	4441	983	51	224	125	112	36	32	359	471	117	233	54	123	28	10	66	13	9	9	91	1072	33	10	12	45
Ciita	MGLibB_10468	TACTGAAGAGGTCCTTGCTC	3550	745	380	169	86	83	226	74	58	144	102	242	84	242	10	238	68	151	258	99	24	135	84	11	40	271
Clock	KY017035	GCTGAAAGACGGCGAGAACT	1301	209	0	0	2	12	0	1	0	9	2	4	0	4	11	0	0	27	0	0	1	0	178	1	0	0
Clock	KY017036	GAACTATACAACGCACACAT	2298	693	56	357	2523	222	984	87	1892	29	73	124	9999	1902	7	3	192	37	931	19	25	11	136	44	20	9
Clock	KY017037	CTAGTGAGATTCGACAGGAC	2188	303	1573	1033	31	0	138	1993	11	194	10	3	43	16092	1	0	9	0	0	4	4	0	0	12	28	6
Clock	MGLibA_10854	AGATGCTAGTGAGATTCGAC	1551	241	1	2	0	21	8	1	2	0	1	0	0	11	0	0	1	0	1	0	1	0	1	0	0	5
Clock	MGLibA_10855	TCCTGGTAACGCGAGAAAGA	853	206	0	41	0	0	14	0	0	0	6	0	0	0	0	0	0	0	0	0	0	206	0	4	0	0
Clock	MGLibA_10856	TCCATCTTTCTCGCGTTACC	6935	2216	1322	2584	1341	2744	1359	2596	1692	3543	2043	2431	895	6146	820	285	383	135	1381	516	1036	2527	7749	1062	3915	2504
Clock	MGLibB_10853	ACTAGCATCTGACTGTGCAG	2143	391	13	480	32	0	46	112	11	11	25	10	12	3	1	1	10	0	8	98	3	21	86	6	0	4
Clock	MGLibB_10854	ATTGGTGGAAGAAGATGACA	862	185	121	14	2375	225	12	127	354	5779	206	27	61	116	11	1836	39	74	9	333	1	2043	2743	1	11	1
Clock	MGLibB_10855	TAGACCCCAGCTCCTTAATG	3774	769	14	937	57	30	68	9	49	93	1966	814	25	1874	2	7	34	3	33	30	18	41	14	2	95	11
Cml1	KY017181	TGGCAAGGAGCCGCAGAAGT	1286	389	14	837	19	15	0	14	54	14	3	12	33	6	8	7	4	2	10	213	1	2	11	1	4	4
Cml1	KY017183	AGCATGTGCCGAAAGGTAGA	1397	231	336	98	97	6939	15	12	55	4	9	16	13	22	463	37	9	8	0	36	57	14	32	3	37	289
Cml1	KY017184	AGTACATTCCCTCTACCTTT	3549	947	135	163	198	201	2648	58	751	89	121	152	33	161	532	49	112	419	163	7	614	393	1939	23	115	25932
Cml1	MGLibA_10956	CAGCATAAGCATGTGCCGAA	1474	286	0	0	18	0	1	0	0	31	4	0	4	0	0	0	0	0	0	0	4	0	41	0	3	3
Cml1	MGLibA_10957	AGTACTTCATGAGTATATTC	1661	255	21	1	1	57	80	23	0	4	18	0	113	3	2	0	0	0	0	10	3	11	0	0	13	0
Cml1	MGLibA_10958	AATGTACTCCTCCATGCCCT	4213	822	8	5	0	13	1	5	16	5	24	6	5	2	0	2	1	0	0	6	2	1	10	1	3	1
Cml1	MGLibB_10955	AGAATATACTCATGAAGTAC	1003	285	2	2	8	1039	54	24	4	0	10	0	5	36	5	2	32	0	289	1	0	9	1	17	4	5
Cml1	MGLibB_10956	AGCCACCCCTCCTAGGCAGA	2839	466	9	28	4	20	4	2	21	3	2	5	1	3	1	0	9	212	0	0	5	0	6	4	0	0
Cml1	MGLibB_10957	TGGTACTGTCGGATGTGATA	3798	922	247	85	274	106	38	216	50	7	48	25	68	155	4	29	2	9	18	66	52	11	70	0	30	303
Control	mCTRL0001	GCGAGGTATTCGGCTCCGCG	4781	1434	870	4307	670	21733	1830	1687	4596	2790	667	2143	2000	15892	486	137	302	1951	321	196	7055	354	5225	2630	64	20692
Control	mCTRL0002	GCTTTCACGGAGGTTCGACG	2571	439	6	59	41	4	10	10	19	2	44	16	117	1	0	0	0	10	1	2	3	7	11	2	9	1
Control	mCTRL0003	ATGTTGCAGTTCGGCTCGAT	3415	1047	21	633	51	233	43	552	54	48	34	9	37	49	3	0	9	2	7	8	3	3	5	143	6	7
Control	mCTRL0004	ACGTGTAAGGCGAACGCCTT	1058	469	0	16	0	0	25	6	13	13	2	1	2	22	2	534	2	0	1	52	24	2	2	2	1	0
Control	mCTRL0005	GACTCCGGGTACTAAATGTC	2068	189	201	17	11	0	12	6	1	5	13	0	2	6	0	0	4	0	46	0	0	4	4	0	1	0
Control	mCTRL0006	CCGCGCCGTTAGGGAACGAG	2643	941	285	233	27	949	217	45	141	10	65	20	16	245	2	12	45	10	276	5	4308	446	5	19	485	195
Control	mCTRL0007	ATTGTTCGACCGTCTACGGG	2731	821	1708	299	9300	96	3693	375	396	265	2500	216	992	577	19	5	42	11	6	17	3	36	254	190	55	45
Control	mCTRL0008	ACCCATCGGGTGCGATATGG	3172	951	26	12	187	60	2845	194	36	102	208	18	29	2605	1	2	24	12	1	72	6	27	4	200	432	12
Control	mCTRL0009	CGGGCGTCACCTGCTAGTAA	2724	1011	27	88	65	104	205	224	315	53	35	14	12	188	4	0	8	28	30	13	3	12	38	1	8	3
Control	mCTRL0010	GCTTCTACTCGCAACGTATT	2627	916	25	165	359	784	94	11	103	8	48	100	38	89	1	0	33	3	430	2	1	15	1	36	70	49
Control	mCTRL0011	TACAGTTATACGTCGCGGTG	2606	1407	537	4910	5084	129	4976	1583	867	692	3381	707	281	223	56	9	76	1019	561	296	5	156	28	28	848	68
Control	mCTRL0012	AAGCACAAGAACGGTCCGCC	1258	557	0	5	8	9	43	16	0	6	10	14	11	12	5	0	0	2	0	0	1	1	0	1	0	0
Control	mCTRL0013	CAGCCACCGCACCGGCGTAA	2804	2056	447	31974	2363	9170	15582	7752	19384	15833	33239	4949	2108	15129	1428	7560	26264	995	1773	2661	6108	20456	11135	9777	12111	13581
Control	mCTRL0014	GTCAAGCCGAACGCTGCCGG	1913	774	325	16749	1929	20881	1738	716	584	250	3513	3550	4132	3568	458	51	1868	522	12524	7250	2111	1054	2031	119	1689	260
Control	mCTRL0015	CCTTAGACCGGGTGTACCTC	3793	1511	36	1561	48	51	80	128	435	16	342	25	239	40	466	15	12	63	3	11	7	27	46	17	25	100
Control	mCTRL0016	AAGTCTATGCGGGGCTCGTA	1597	317	0	15	74	26	34	9	12	27	104	1	1	0	2	0	42	1	0	1	1	0	49	0	1	0
Control	mCTRL0017	TTGTCAACTTCGGCCAACGC	4566	1831	5956	352	486	3597	408	385	350	1709	568	1037	1079	2667	48	58	86	593	7829	1057	1661	1111	5866	99	182	222
Control	mCTRL0018	ATAGATGTCTACGCGCCGTT	3862	538	6	10	28	90	14	11	5	6	78	728	7	12	11	0	1	1	8	2	93	9	3	5	3	2
Control	mCTRL0019	CTCGGGCTATTCAGCGATAG	1464	685	548	691	1138	549	1130	552	2512	384	742	3456	1593	6572	509	214	202	213	168	330	43	147	240	146	171	3798
Control	mCTRL0020	GCGGTTACCGCGAAAACCAT	1715	580	3	10	2	14	4	6	142	433	5	4	6	6	6	391	24	0	4	0	4	6	12	0	2	7
Control	mCTRL0021	ACCAACGCTACGATCCCGGA	2214	408	17	1625	0	0	25	4	5	150	4	10	0	16	0	5	584	0	5	0	24	34	0	6	0	3
Control	mCTRL0022	CCCTATATGCGAGATCCATA	3303	856	2	6	2	89	4	17	20	7	264	73	23	4	4	14	3	2	7	5	19	16	8	0	17	30
Control	mCTRL0023	AGAAAGGCACGTGCGACGTC	2048	668	0	11	6	38	92	12	213	2	39	34	23	69	3491	29	17	118	1	2	2	35	2	4	7	27
Control	mCTRL0024	GACCAACCTTACGGTAACTC	2134	871	739	175	26	96	36	13	46	149	221	127	65	338	5	23	38	126	6	9	753	10	330	83	378	8
Control	mCTRL0025	ATTATTCCTCCGGATGACGA	2598	372	27	113	21	13	8	43	12	1	22	14	12	3	1	0	0	0	0	0	2	1	0	0	0	8
Control	mCTRL0026	TCTCAGTTCGTAGCGAACGA	3089	1579	10	76	42	263	43	214	80	25	467	17	188	289	45	2202	80	4	14	17	8	91	26	8	158	37
Control	mCTRL0027	TCCCGGGAGGTACGGTGTAC	501	92	0	0	1	0	0	0	0	0	0	0	1	2	0	0	1	0	2	0	0	1	0	0	1	502
Control	mCTRL0028	GGGGATGGCCTTACGTCGCG	2808	1008	10	6	22	43	7	275	10	11	6	14	1759	0	3	1	29	2	5	1	2	2	21	2	31	0
Control	mCTRL0029	GTATCCTCCTTACGGCCCGT	4154	979	201	7	68	31	64	21	117	18	40	31	219	343	3	0	5	2	8	0	0	42	16	100	5	8
Control	mCTRL0030	GCTCGGACCTTTTAGACGTC	3433	1082	62	103	834	262	196	94	72	130	83	24	136	713	477	153	89	288	210	32	36	105	29	9	35	3
Control	mCTRL0031	GTGGTTACGTTAACGACTAC	2354	564	2	0	2	6	113	0	4	6	4	38	1	1	12	0	1	0	1	1	19	19	6	0	7	3
Control	mCTRL0032	TGCAACGATGGTTACGGTAC	3115	1710	770	22	310	75	105	9	44	13	26	26	234	5145	2147	52	5	7	18	18	6	26	120	6	41	14
Control	mCTRL0033	AACGGGCGCAATACCCTTTT	3348	665	14	50	201	216	3	20	48	164	131	72	41	150	4	12	2	3	14	2	2	19	7	4	4	2
Control	mCTRL0034	TCGTGTCTAGCTATCGAGTG	2740	406	11	259	28	32	177	3	53	23	11	11	201	12	9	350	45	3	3	60	0	2	89	0	19	1
Control	mCTRL0035	GACGTCTAATTTCTGGCCGT	1389	377	45	914	1	97	46	31	347	190	34	69	26	5	14	11	3	2	1	2	1	397	29	4884	7	7
Control	mCTRL0036	TAGTCCTAGTTAGATTCGCG	3973	1245	52	27	194	5	111	16	167	4	15	6	34	28	0	0	7	0	2	19	1	38	0	44	1	3
Control	mCTRL0037	AAGGCCTTAACACGTCGACC	2636	655	13	89	12	8	3	11	78	0	42	5	277	482	0	3	13	2	1	1	1	6	3	1	0	8
Control	mCTRL0038	ATTCGTGCATCGCGGGGTTT	4297	1099	207	178	144	126	373	60	91	27	221	120	48	247	26	7	802	90	1773	1	29	1737	624	27	19	660
Control	mCTRL0039	CACCTCGCGTCATATCACTA	4631	1544	51	667	86	154	100	223	320	676	59	44	294	948	48	9	392	9	17	8	102	36	174	62	48	118
Control	mCTRL0040	GACCTCGCAATTGAGCGCTC	2512	1104	193	71	22	44	78	4	16	5	1163	15	12	45	0	5	9	9	9	2	6	5	2	1	29	6
Control	mCTRL0041	TGTATCCACCGTGACCCGGT	2406	699	67	33	20	20	13	0	64	34	24	2	18	2	2	0	4	2	3	0	1	249	16	4	8	3
Control	mCTRL0042	GATCTTACCACTCGTCGTAG	3589	587	1	18	25	2	11	69	15	45	26	10	33	12	0	0	0	4	8	0	2	7	3	0	7	2
Control	mCTRL0043	TTCGCCGGCGACGAAGTGCA	3385	1239	1168	1008	2150	28990	834	813	3234	1790	2517	4650	982	2450	51	282	273	205	540	584	151	1014	392	340	192	3662
Control	mCTRL0044	AGCACTAGGATCGCGGCCTT	1867	483	5	9	41	0	21	1	67	1	71	1	0	3	0	6	0	0	77	0	0	1	0	0	1	1
Control	mCTRL0045	GCGTATCTACCCTACCGCCG	1383	171	0	0	1	26	34	1	0	1	1	0	1	0	3	0	2	0	0	0	2	0	3	1	0	0
Control	mCTRL0046	GCGCGAGGGCACCGACAAGT	1424	1067	474	3330	772	760	219	34	34	164	1294	541	399	484	43	5	22	1467	1359	272	9	55	55	7	181	45
Control	mCTRL0047	CGCGTATATGTCACACGGCA	3316	837	25	599	11	24	90	36	21	15	734	96	71	488	267	5	1	6	4	15	16	53	52	7	113	24
Control	mCTRL0048	TAAAACCGATCACGATACGA	1171	321	29	3118	16	124	1	78	2	190	1	119	604	771	2621	1483	77	2301	21	3447	28	1002	14	202	737	7337
Control	mCTRL0049	TCCTGCGCGATGACCGTCGG	6466	2062	159	245	794	364	245	77	58	455	447	73	119	322	1268	33	99	3977	801	284	7672	2973	58	77	383	46
Control	mCTRL0050	TGGCCCACAAGGTGCGATAT	4495	1814	236	1214	189	981	19448	2033	1151	1263	117	108	905	385	83	19	146	8585	2129	113	130	153	3212	78	153	701
Control	mCTRL0051	GGGGTAGGCCTAATTACGGA	964	672	4	478	244	27	265	81	173	300	69	25	129	177	12	2	14	55	24	10	17	32	13261	142	111	10
Control	mCTRL0052	CGCTTCGTCTCTCGCAAACA	2987	950	6	1724	89	190	17	299	18	21	224	14	49	484	19	5	4	3	27	1	4	41	6	17	0	27
Control	mCTRL0053	TTATGTGCCTCTCGGCGCAT	6160	2145	37	117	426	1248	390	62	282	1739	59	157	117	230	8	215	417	19	21	20	119	279	110	76	43	67
Control	mCTRL0054	CCGTTCTGACGACGCTAAAG	2116	605	3	12	7	23	46	268	20	0	17	10	1	101	1	0	2	0	8	0	0	18	7	1	4	4
Control	mCTRL0055	AAACTCCCGTGTCAACCGAT	3047	1195	4	725	1007	63	52	2	37	8	82	126	12	7	6	2	47	13	12	7	20	42	40	5	14	103
Control	mCTRL0056	GTTTGCGAGTCAAAGTACGC	2431	770	8	23	4	17	118	33	265	2	34	8	61	129	1	3	15	38	7	14	1	4	9	3	1	53
Control	mCTRL0057	GGGTGCACACGCCGGCCTAT	1829	801	47	21	0	38	101	25	53	61	29	22	87	4	158	10	8	1	1	32	2	144	11	32	13	0
Control	mCTRL0058	CTTTATACCGCGCGTCGGCA	4820	1026	6	36	1	0	268	5	3	264	11	10	3	10	0	0	2	0	1	664	4	14	139	4	6	5
Control	mCTRL0059	TCAAACGCCCGGGCGCCCCA	3264	1274	1263	400	238	448	326	116	754	279	124	182	485	43	1567	28	60	250	15	633	6	151	195	109	16	7127
Control	mCTRL0060	GACCGGTGTGTTTACGCGTG	5091	1327	87	120	38	410	248	21	10	79	21	46	923	31	16	0	0	2	7	21	10	8	31	5	8	15
Control	mCTRL0061	CGGTGAGGATCCCTCTTGCG	2095	442	0	76	444	354	1403	22	272	117	44	14	6717	497	6	0	5	28	3	2	7	7	73	379	532	4
Control	mCTRL0062	ACGGTCCCAACGAGCGCCGG	2192	565	12	7	55	19	241	0	114	4	39	15	26	51	1	0	2	2	6	0	5	26	10	9	0	0
Control	mCTRL0063	CGCTTCATTGCCCGAACGCT	3857	990	450	275	9	27	44	374	26	200	341	64	77	117	4	0	1	7	1	3	55	1	45	6	66	4
Control	mCTRL0064	TTATACCGTCACGAGTGCCC	7056	2654	303	825	38	271	77	156	174	131	468	760	191	217	18	75	110	10	25	184	67	35	140	97	96	18
Control	mCTRL0065	TGCACCGGTACGGGCGACTC	3711	1065	283	190	44	1098	819	244	278	165	232	8	306	96	139	8	570	362	46	112	26	216	872	28	86	724
Control	mCTRL0066	GAGGCGTACTTCGGCTCTAA	1017	163	0	0	0	6	0	1	4	6	6	0	68	6	5	0	0	0	0	1	0	0	0	0	0	0
Control	mCTRL0067	TTCGAGACGGATACGTCTGC	4403	2401	456	569	9673	227	553	104	2256	1167	809	215	893	1109	37	13	61	53	17	11	333	66	50	9	34	11
Control	mCTRL0068	TAGCCCGTCGAGTACTCCCC	7376	2592	1495	2309	742	931	3569	2517	2624	4565	12565	3486	3904	2536	197	39	538	157	37	441	245	162	362	196	107	222
Control	mCTRL0069	AGCTTAGATCGTGCGTCGTA	2984	823	56	54	41	13	623	8	41	13	4	24	419	103	16	2	3	1	3	0	92	5	49	8	188	5
Control	mCTRL0070	CGCCGGATGACTGGTGGATA	2628	647	118	94	23	59	63	41	181	7	293	83	124	42	59	5	8	1	8	3824	8	2	65	41	21	985
Control	mCTRL0071	CCGTTTCGCCTATTGGTGCG	4773	1707	289	2275	480	294	855	156	426	133	356	443	243	720	280	800	24	1028	39	52	463	275	1006	46	983	127
Control	mCTRL0072	TTCGACGTGCGGCGTATTGG	7551	1965	13	105	10	57	76	194	804	10	211	19	92	61	24	96	73	5	10	5	6	9	55	106	3	1
Control	mCTRL0073	TTCAATTGTTCGCCCGAACA	2646	876	283	9	88	13	51	94	16	14	20	7	9	10	20	1	11	1	10	1930	14	14	25	6	669	2
Control	mCTRL0074	GCGGATCTGACGGTTACTTA	1805	1154	3285	3123	192	228	155	438	4066	6118	2884	924	20389	26600	149	10	195	1333	257	85	182	60	275	207	14	205
Control	mCTRL0075	AATGAAGCACCGATTGCGGA	1115	249	6	0	8	1	0	5	2	0	5	2	2	5	9	0	4	0	1	0	0	1	0	0	9	0
Control	mCTRL0076	TCCTATAATTGAGCGAACGG	2052	566	22	14	7	12	4	194	11	0	260	25	8	13	2	10	0	0	0	0	0	3	8	2	1	1
Control	mCTRL0077	GCTACAGATTTGCGTTCGAG	2647	417	16	17	0	26	5	18	0	3	34	180	1	0	2	0	2	2	5	10	3	0	6	0	0	0
Control	mCTRL0078	GGACTGAAACCGATAGTATC	920	161	7	813	3	174	7	0	6	0	0	0	0	0	0	1	0	1	0	24	0	17	0	0	0	0
Control	mCTRL0079	GCAATTCTGCAACGCACGTC	3458	909	568	202	385	80	936	318	520	211	216	312	58	228	17	18	66	74	295	128	40	54	8	82	8	21
Control	mCTRL0080	CACCCGACTCGGCCGTAAAG	2257	628	2	223	636	137	25	31	6	11	48	12	83	13	0	6	92	7	8	3	4	5	3	4	1	8
Control	mCTRL0081	CAACCGTGCGATGCGCGCTA	4543	1977	105	90	129	362	179	48	48	11	24	24	75	26	4	61	4	41	8	69	16	29	54	11	0	294
Control	mCTRL0082	TGATGGACGCGATACGTTTA	4187	1251	31	28	26	38	229	80	16	31	33	5	10	458	7	5	4	113	27	2	10	3	16	9	88	275
Control	mCTRL0083	TACCCCTTGAGGGGCGCATA	3649	1127	15	31	1481	2783	61	96	646	61	267	61	7	20	0	52	1	0	5	27	16	1	6	22	0	64
Control	mCTRL0084	CCGTATACGTATCTATGCCG	3545	1098	15	2131	68	105	16	99	464	121	74	97	147	72	4	27	2817	8	5	60	6	3286	49	15	24	89
Control	mCTRL0085	ACAGCGGCCTAATACTTCGC	3584	1201	6	297	157	2	17	803	12	11	3	14	49	9	4	0	0	5	2	51	13	20	25	1	10	1
Control	mCTRL0086	TATCGAACTGCACACGCAAC	4840	2460	11454	13169	14325	25995	61460	14960	25109	5301	18793	11529	16071	9501	91372	106922	69190	11549	61163	17310	66874	35194	90655	89128	68866	107141
Control	mCTRL0087	TGTCGGACCCATTGTCGAAC	4062	1338	41	1608	11098	34	297	19	170	91	8	249	243	82	3	5	26	55	14	67	41	119	206	14	19	8431
Control	mCTRL0088	AAACCTAGCGTAGATTCGGC	1283	201	0	1	37	0	16	0	2	4	2	11	2	0	3	0	0	0	2	46	0	23	0	6	0	0
Control	mCTRL0089	TAGATGGTGCTTCTGTCGCG	5981	2129	835	252	6388	361	756	6429	1591	27383	186	4598	911	9134	431	68	447	17928	883	34	195	1024	898	2240	1024	2669
Control	mCTRL0090	CATCGTAACACACGTACGAG	2154	1027	132	55	62	65	122	93	119	339	12	1027	9756	18	329	33	256	41915	33	47	14	83	9	50	108	37
Control	mCTRL0091	CAACGATCAGGCGTGTTATC	2640	1507	280	1038	1244	148	1507	680	2182	533	3182	191	2859	2415	73	120	9848	1840	24	244	222	317	317	1050	1625	321
Control	mCTRL0092	ACAGCAGGGGCCGCGAATAA	1448	458	5	1	94	3	57	20	6	4	148	6	15	15	2	0	1	1	0	1	5	2	6	0	10	1
Control	mCTRL0093	AGCCGGGCTTTCCGTCAAGC	1714	509	224	32	1	39	2	25	2	0	11	33	5	15	12677	141	12	14	3133	28262	1646	30	98	11	6	97
Control	mCTRL0094	ACGGTCCCTCTCGGGTCAAT	5441	2545	551	41	88	388	206	39	77	279	697	50	276	20	14605	202	274	114	14	265	27	37	650	73	47	166
Control	mCTRL0095	TCAATAGTTCTGCGCGAATT	3423	514	1	6	1	14	1	112	118	1	2	2	0	15	8	3	1	51	12	0	2	0	2	2	0	1
Control	mCTRL0096	TCGTTACATACCCCGCGGAA	3141	892	10	134	17	21	23	22	7	1	70	12	9	15	0	2	43	0	2	1	3	8	10	6	6	4
Control	mCTRL0097	CATTCGGTCCGTTCATCTCG	6649	2431	425	679	597	1853	665	57	423	45	774	227	399	148	35	36	323	33	31	54	43	367	273	38	14	52
Control	mCTRL0098	TTCGGCTCAATGGCGCGAGC	3118	819	9	0	54	52	0	6	0	2	8	10	16	653	30	0	0	7	2	10	2	22	3	4	1	4
Control	mCTRL0099	CATACCCGCGCCGTGACTCC	6526	2086	198	310	139	340	160	19	120	1164	145	13	149	2643	19	38	109	44	9	201	9	32	140	7	125	24
Control	mCTRL0100	GGACGGATGGGACGACTAGT	1399	578	62	120	528	116	7	50	36	4	1199	205	67	118	2	2	4	2	166	241	2	60	1	5	3	10
Control	mCTRL0101	GTGCAACGACTGACCCGCGG	2399	794	14	308	22	4063	44	3	13	431	52	28	54	33	6	489	4	3	10	4	0	3	19	2	4	5
Control	mCTRL0102	CGACACTTGGGCTGACGCGC	3384	1601	41	35	182	223	113	328	578	53	622	54	1421	277	16	16	24	41	1	13	4	30	239	10	2137	19
Control	mCTRL0103	TGTGTAATTACGTTTCGCGG	4373	1199	330	13	64	401	13	455	75	7524	2018	18	111	147	43	9	1	17	0	2	627	7	6	68	118	1
Control	mCTRL0104	AACCGTACTGCGAGGAGCAT	2377	1023	35	182	135	106	1102	34	94	7	129	70	102	27	2	2	84	53	5	2	3	79	295	37	5	35
Control	mCTRL0105	GATATTTACCGGCGATAAGA	836	100	1	1	1	7	19	3	4	1	4	0	5	18	0	0	0	0	0	1	2	0	0	1	6	2
Control	mCTRL0106	GCGACGTGTATCGATCACTC	4021	1145	5	24	33	76	18	4	63	17	7	24	3	11	10	33	81	10	8	0	0	2	27	37	3	3
Control	mCTRL0107	TAATGGAAGATGCGCGATAC	3459	713	37	3	21	5	160	3	4	6	0	32	2	1	1	0	0	1	33	6	0	0	3	1	2	34
Control	mCTRL0108	TGTCCTACCGAATGAACCGT	4354	1725	372	992	1798	607	1629	988	843	218	775	370	2166	352	62	318	186	679	2271	24	63	420	137	3305	50	410
Control	mCTRL0109	ACGCGAAGTGTCGCAGAGTG	2460	738	4	30	147	122	23	30	4	21	66	5	72	11	0	0	4	30	1	9	2	2	7	2	0	2
Control	mCTRL0110	GCAGAGCGTAATCGGCATCG	3761	1012	328	35	61	480	7360	37	651	22	503	736	1110	5606	5360	81	14	147	33	31	2	11	55	28	10317	170
Control	mCTRL0111	GCCGCGCCATAATATGCCAT	4976	1488	123	277	407	591	2410	2179	457	182	3170	190	470	375	142	153	2518	123	2014	25	1128	35	428	30	490	98
Control	mCTRL0112	CGAATGCGCCGGAGAATATT	1750	405	4	1	9	150	0	2	17	2	139	3	8	0	0	1	1	0	0	0	1	2	4	0	5	0
Control	mCTRL0113	CCCGCCTGGCGATTCACGGG	3206	1501	156	415	9	211	189	57	195	34	659	155	284	74	107	61	21	46	25	17	3	84	10	592	156	4
Control	mCTRL0114	AGCCTAGTCGCGCTAATATT	2908	964	8	13	78	255	24	56	65	7	84	69	15	97	6	7	53	5371	4	8	11	28	9	5	0	134
Control	mCTRL0115	GTGTGCCTCGACAGCGTAAG	1980	923	1043	582	106	4772	103	170	963	452	673	190	1380	283	763	57	1756	1161	194	569	406	855	2695	56	245	3019
Control	mCTRL0116	TCATGCGCCTCGTAATACCT	6970	2230	20	83	32	1475	98	104	3186	148	502	821	1273	1836	830	33	10	17	12	958	15	1472	1097	33	17	14
Control	mCTRL0117	TGTGCCACGCCGCTGCAACG	4250	2388	188	276	169	214	506	68	2703	74	286	46	61	117	204	6	8	8	5	98	356	18	327	42	3	31
Control	mCTRL0118	GCAAATAGGTCGGAGCGTGT	2612	1044	176	407	67	51	147	108	144	35	358	63	34	19	0	6	38	8	3	4	2	0	115	5	92	6
Control	mCTRL0119	GGATAGCCCGGTTGGTGCGT	2068	985	110	322	486	4881	161	574	1252	1843	19896	1415	5473	8002	89	528	69	330	13	87	186	124	66	257	5290	615
Control	mCTRL0120	TCGCAAAATGCGGATTCCGT	3903	1246	20	123	229	14	43	33	24	9	30	44	382	467	3	0	32	4	0	5	2	19	49	3	62	89
Control	mCTRL0121	GGTGCAGTCCGTTTAGTCGG	3598	1081	95	0	29	20	127	38	61	203	36	7	56	773	1	6	4	4	9	4	167	12	8	306	10	7
Control	mCTRL0122	TGGGTTCCGGCCCCATGTAC	5216	1579	129	553	99	793	339	162	935	570	15124	8706	8270	14789	824	1128	840	896	152	594	47	5173	4785	11400	2749	6888
Control	mCTRL0123	CCTTCGGATTCGTAGGCTGG	2784	1426	41	1560	33	123	20	2	40	17	114	20	4	21	35	33	3842	72	0	11	5	10	96	1	27	27
Control	mCTRL0124	TCCCCCGTACGTGTATGTCG	8534	2912	78	347	590	2562	996	143	3000	857	283	1413	725	1118	1316	20	11	66	64	40	24	1610	109	25	51	42
Control	mCTRL0125	AGGTGCGTGTCAACCGGTAG	2129	489	32	36	9	32	57	17	2	1	4	2	13	28	0	0	55	0	3	9	5308	9	5	1	0	1
Control	mCTRL0126	AAAAAGTCCGCGATTACGTC	2367	670	3	36	4	1	136	16	28	10	18	773	122	13	167	2	4	2	5	1	1	2	11	0	0	3
Control	mCTRL0127	TTATCGCACAACCCCGAAAG	2092	724	17	104	5	242	3083	6	38	6	2855	5	23	169	39	1	5	83	36	23	8	18	40	5	106	2
Control	mCTRL0128	CACCCCGTAGCAACGATAAA	1471	690	1060	1091	257	3832	409	178	283	2051	1031	1359	2484	116	83	283	98	39	115	333	171	68	71	43	104	1753
Control	mCTRL0129	TAACAGCTTCCGCGTAATAT	3390	982	224	45	704	387	77	109	35	119	172	63	104	616	169	6	176	116	44	61	5	38	186	129	13	26
Control	mCTRL0130	GCCATAGCCAATCGCTAGTT	3553	1579	47	301	5499	53	99	186	61	186	38	680	172	58	267	7	2	114	241	798	383	102	9	6	50	8
Control	mCTRL0131	CATCTATGAGACGTGCGTAC	3450	822	11	222	43	747	25	5	5	32	29	33	9	11	8	0	7	0	1	4	0	10	2	5	92	10
Control	mCTRL0132	TTGATAAACCGCGGCCGAAA	1201	372	36	4	0	12	25	7	8	11	0	27	38	30	1	0	0	13	7	1	0	31	0	1	12	0
Control	mCTRL0133	GTATCCTCGCAATCGTTAGG	2539	628	6	25	142	6	1092	20	506	46	148	76	6121	563	4	1	549	52	5	11	5	24	0	5	23	1
Control	mCTRL0134	TGGCGCTCCTGCGCACACGA	1641	547	12	35	63	12	9	34	272	8	10	7	218	34	8	0	0	6	4	2	0	0	27	8	1	0
Control	mCTRL0135	TTCGAAGTCTAACCCGCGGG	2422	378	0	33	1	291	5	26	4	9	1	4	4	0	3	0	0	0	0	0	0	0	0	0	0	10
Control	mCTRL0136	GTTTCCCGGGACTGTCGCGT	4828	1153	5	10	26	28	23	78	27	21	216	32	152	8	2	0	3	62	20	12	2	3	44	8	6	21
Control	mCTRL0137	AACGCCCCGGATTTCGTTGA	2613	869	19	405	272	209	179	881	169	57	16	11	222	32	8	5	45	267	49	51	2	13	45	7	129	21
Control	mCTRL0138	ACAACACGCCGACACGTCTA	2792	511	16	9	11	9	5	0	33	1	6	28	2478	6	2	0	2	0	1	23	0	1	8	2	0	1
Control	mCTRL0139	TAAGCGGCGTCATGTCGCCC	5108	1907	28	30	769	564	260	23	37	415	712	128	1489	90	16	18	38	22	95	40	1	124	21	41	39	24
Control	mCTRL0140	CCGCCCCTGCGAACTGCGTT	4928	1707	104	83	365	388	754	185	91	81	2368	210	340	815	85	26	3	40	18	14	50	464	153	20	41	5
Control	mCTRL0141	TATCTAATCGCGGAGTCGTA	3241	698	2	0	25	107	106	54	23	4	7	5	42	9	8	28	1	0	2	0	4	6	5	1	16	2
Control	mCTRL0142	ACGCTATAGTGTACGTCTAA	1958	1258	1061	2883	7882	5433	5080	4585	6063	1265	13126	1541	1132	716	9052	6628	2453	2780	4319	11864	18374	855	4803	1000	597	3462
Control	mCTRL0143	GTAGACATATTGCGTAATCG	2203	392	9	343	67	107	71	17	126	32	37	385	24	66	26	0	166	5	0	0	3	6	28	3	11	8
Control	mCTRL0144	CGTAAACCATAACGTTGGTC	2136	473	3	3	4	0	11	1	1	148	17	20	8	5	1	1	54	2	0	0	21	0	0	2	0	0
Control	mCTRL0145	GGACGTAGATTAGGGCGTAA	1813	499	215	2477	347	6653	44	225	54	179	352	89	6079	543	73	47	3812	326	909	778	10	163	1150	51	35	1069
Control	mCTRL0146	CGGGCAATATGATCGTAGGC	1709	843	153	177	1	26	6	13	14	11	40	26	20	14	3	0	26	3	117	6	2	7	215	64	6	0
Control	mCTRL0147	GGACCAATGTTACCGTAGGT	1378	462	1	17	0	1	4	4	1	3	3	0	58	9	0	0	0	0	0	0	2	4	2	0	0	1
Control	mCTRL0148	CAGGGACGTAGCCGCCGTTA	3272	920	5	10	14	45	20	270	39	3	14	11	4	9	1	4	2	2	0	10	11	9	22	2	5	2
Control	mCTRL0149	AACCCCGGCTGTCATCGCCG	5052	1332	1196	110	291	6488	133	24	124	1784	34	1489	116	390	133	14467	148	63	1895	449	483	67	4868	135	16	139
Control	mCTRL0150	GATTCATTATCGGCATACGG	2724	549	4	3	4	11	0	11	1	1	3	2	42	0	1	3	2	0	0	2	0	1	0	1	1	3
Control	mCTRL0151	AGTCATCCTCTATGCGCGTA	3161	629	22	16	347	153	314	1	13	14	60	39	10	8	4	1	4	6	1	454	3	15	485	55	0	2
Control	mCTRL0152	CGTACGGGCGCGCCGTCCAT	5015	2022	131	330	341	451	915	458	425	206	1679	246	380	402	46	55	398	19	326	22	83	1487	146	81	56	52
Control	mCTRL0153	TTGCGTGTGCGTTGTTAACG	5463	2241	24	83	1299	335	264	50	3520	70	346	412	107	1287	7	8	39	11	24	81	19	408	166	10	80	179
Control	mCTRL0154	GACCATACGCCTCGTATGCC	4143	1800	82	3438	409	1318	478	267	211	353	3117	154	536	24206	29	25	46	95	10	40	21	252	35	16	42	34
Control	mCTRL0155	CGGCAATGTGTGGCGACCGC	4758	2126	132	262	330	1084	379	234	430	134	570	4	1971	79	106	4	25	825	187	365	28	120	269	4	154	49
Control	mCTRL0156	TCGCTAAGCCGGGTAATACT	3099	1322	41	839	351	326	2266	35	25	47	31	78	87	129	63	1	18	18	10	3	10	133	468	9	62	9
Control	mCTRL0157	TTTCTAATTACCCGATACGT	3501	1109	243	128	2464	282	895	228	289	177	3962	818	4163	977	108	18	37	47	34	163	104	68	365	247	106	472
Control	mCTRL0158	ACCAGGACTGCCGCGTGAGG	2350	963	45	2508	464	695	953	251	88	238	1765	52	295	8276	25	1	21	17	5	1	5	2	7	18	57	9
Control	mCTRL0159	GCGCGTACATATAAATAGGT	931	479	169	95	2605	611	1047	192	335	122	4269	845	4299	842	108	20	37	73	32	65	98	69	270	221	86	573
Control	mCTRL0160	CTTATCCATAATAGGCGGCG	1337	176	6	16	0	63	0	1	0	0	0	0	2	0	0	0	0	0	0	0	1	38	22	0	1	0
Control	mCTRL0161	GTTATTGCGCCTTGGCCGTA	4999	1238	19	34	58	56	2513	21	210	11	297	11	2936	31	0	2	7	2	38	1	3	1	80	2	5	26
Control	mCTRL0162	TAAAAGTGGTGCGTCGTCGT	2632	1097	74	196	1564	944	144	208	691	64	705	155	113	74	9	4	50	237	23	32	15	30	68	44	36	19
Control	mCTRL0163	CTCGTGAAACAAGATCCGAC	1315	440	4	29	18	8	0	0	0	287	4	6	1	10	0	1	0	0	1	3	0	12	10	0	1	0
Control	mCTRL0164	TAAACGATTCACCGATAACA	1695	236	4	8	6	6	5	3	3	0	6	3	1	23	0	0	0	2	0	3	0	0	16	18	1	12
Control	mCTRL0165	CGGCCGTAGTGACGAATGGA	2228	703	20	35	46	233	156	5	19	3	43	67	38	439	49	33	8	3	1	90	0	2	12	1	1	1
Control	mCTRL0166	ACCGGTCGAAGTCTGGGATT	3527	1382	35	56	290	31628	1507	12	31	171	21	75	29	195	16	14	77	20	25	36	23	304	59	16	107	27
Control	mCTRL0167	TCCGTACATCGACCTATTAC	6562	2866	200	4074	323	8228	4411	5774	1722	12485	780	2454	5065	18591	157	100	5302	1021	203	456	382	772	1137	201	4680	2529
Control	mCTRL0168	CGACACGATGGTCATACTAC	2592	1102	50	1546	403	128	37841	379	134	64	522	50	87	61	374	41	65	128	60	160	167	681	28	8	27	9732
Control	mCTRL0169	ACTCGACCTAACGTCGATGT	2315	957	75	100	34	283	24	71	10	19	33	5	146	133	0	1	3	41	1	8	6	3	4	2	87	30
Control	mCTRL0170	TGCAGATCGCGAAGCGACTA	1279	336	5	1	291	34	89	7	9	20	2398	0	625	15	2	0	7	4	0	2	0	6	0	2	1	0
Control	mCTRL0171	TCTAGGATACTCTTAACGGG	1021	325	26	11	25	3588	7	3	182	4	24	97	2	7	0	0	0	0	10	1	0	4	0	0	0	21
Control	mCTRL0172	GGTCTGTCCGTTGCGACCAC	5220	2184	69	122	362	225	48	309	58	23	1507	155	531	328	32	1	30	668	18	132	24	32	3820	882	54	10
Control	mCTRL0173	ACCGGACTGCGATATGCCGT	3633	1259	4	92	144	49	248	11	124	19	11	24	29	110	8	9	339	17	1	3	4	5	3	3	10	12
Control	mCTRL0174	CTCGTATAGTATTGCGTGGT	3327	1111	80	115	33	113	25	21	46	15	18	12	4	455	0	0	1	1	34	3	3	4	4	0	6	35
Control	mCTRL0175	CTTTAGTCACGATATACGTC	3486	881	0	1	11	28	156	6	8	7	11	59	46	12	1	0	0	0	0	0	31	2	9	0	1	3
Control	mCTRL0176	GCGGCCCGTGACCGTTCAAT	3930	1539	20	64	43	445	93	556	163	165	49	274	31	345	26	2	49	14	13	49	27	175	37	13	51	3
Control	mCTRL0177	CCGGTTTATAAATTACGTGG	1718	397	7	2	4	1	43	1	2	7	0	1	35	7	18	0	0	0	1	1	4	1	6	0	0	0
Control	mCTRL0178	CAGCTCACCCTGCGTACGGT	2165	1006	4	19	39	201	110	6	17	3	40	24	29	22	0	3	4	2	9	2	13	5	0	4	2	5
Control	mCTRL0179	CTCGGCTTTACGATCGATCA	4090	1541	21	132	86	592	106	1882	82	670	87	19	65	42	1	0	31	8	64	15	808	13	41	1	2	69
Control	mCTRL0180	TCTGCACCGCGACTTAGCTT	3629	785	6	1	14	27	24	6	0	2	7	3	30	35	409	1	3	2	1	10	1	5	14	1	4	5
Control	mCTRL0181	GGCTTATAGACGAGACTCGA	1573	403	14	46	6	34	78	1	5	555	52	63	14	37	0	2	0	0	0	4	2	31	51	3	2	2
Control	mCTRL0182	ACCGGATGTGGGCGCCTCTC	3987	2220	2042	632	300	174	1237	41	379	268	100	69	98	208	152	3109	72	225	15	603	35	212	45	17	6	285
Control	mCTRL0183	CATTACGTGTCGAGCTCCGG	4868	1156	364	40	150	137	55	12	15	6	133	1373	32	67	1307	13	28	33	619	1342	272	4818	238	1	15	21
Control	mCTRL0184	GATGCGGGTGGAAAACGTTA	1075	324	2	342	13	17	102	0	2	20	0	3	1409	1	1	1	2	1	2	0	0	4	10	1	3	0
Control	mCTRL0185	GCAAAAAGCGGACACGCGAC	1738	490	2	82	20	46	39	65	25	5	26	21	135	0	0	1	0	0	0	0	13	4	14	0	0	1
Control	mCTRL0186	CGAGGATGTACATACGTAAA	1597	429	17	1097	869	72	138	75	15	22	4	73	207	19	6	27	5090	13	0	8	5	5	252	40	26	16
Control	mCTRL0187	ACACGTCTTCGGCTATACGC	6379	2946	690	1154	6451	3043	1810	1805	3886	2235	5545	1026	972	3134	1150	7273	6234	232	177	545	955	786	1210	287	845	889
Control	mCTRL0188	TCGTGCCTAGCTCGGTTGAG	3273	1186	259	1342	734	182	298	238	753	142	137	102	109	234	67	39	210	38	37	891	167	1814	147	72	156	19
Control	mCTRL0189	TCACACGGGATCTCGCCGGT	3292	1180	46	349	1123	167	260	700	206	128	263	29	26	37	8	0	45	11	51	921	35	4	350	15	6	34
Control	mCTRL0190	CGTGCGTTCGTAATAAAAGG	1376	349	9	1	2	13	39	22	11	23	0	4	12	3	0	0	1	1	3	0	0	22	0	0	1	1
Control	mCTRL0191	CCCCTTCGATATCCGATGAC	5382	1291	105	123	21	520	122	7	231	28	26	63	13	83	6	7	6	7	21	114	3	26	9	9	320	2388
Control	mCTRL0192	CGTGATTCCTAAGCCCCCGC	5627	1812	133	1198	93	169	26	42	60	211	116	333	516	120	1	18	15	299	15	33	74	32	103	19	11	10
Control	mCTRL0193	GCGTGCCATGGGAGGCCGTT	2280	1113	43	120	76	133	224	28	78	25	13	104	90	416	14	12	923	937	9	13	124	247	13	227	10	16
Control	mCTRL0194	GGCTTTACGTAAGGAGCGTA	2046	697	3069	1112	7947	740	179	522	1339	140	442	502	255	176	508	35	534	102	163	3895	4645	268	603	311	191	43
Control	mCTRL0195	ACCCTAGCCTCATCGCGACC	3989	1229	16	87	261	67	59	51	61	77	8	287	2	18	1	1	42	2	64	10	9	4	9	2	2	3
Control	mCTRL0196	GCTGATTAGACCCGGCGTAA	1724	327	3	22	1	4	16	43	4	6	4	2636	2	7	0	0	0	1	1	6	4	1	0	5	0	3
Control	mCTRL0197	GTTACCCCTTTGGCCGGAAG	2602	627	15	31	1	32	27	3	8	133	56	70	4	141	19	4	0	2	6	0	0	322	6	3	3	2
Control	mCTRL0198	TAACGTTATGTCAAACGCTC	1885	499	1	8	34	26	0	1	2	12	0	2	29	4	6	0	4	0	27	15	22	12	0	0	3	0
Control	mCTRL0199	GGATCGATCCGAGGAACGTG	2483	1254	244	45	134	32	52	14	5	63	93	9	194	15	0	0	3	42	3	9	4	28	7	5	44	7
Control	mCTRL0200	CTGCACGGCACGACATCCAA	3156	1172	32	46	105	39	48	161	201	114	88	144	23	46	45	0	9	114	15	98	16	13	31	278	170	12
Control	mCTRL0201	GGTCAAAGCGATGTTAGCCG	1342	384	0	0	1	0	0	4	27	3	9	0	6	5	2	0	0	0	0	1	0	0	0	2	0	6
Control	mCTRL0202	GCTTGTAATCTAAAGACGCG	1169	350	208	216	32	129	66	74	13	61	71	329	8	148	1	0	5	1	0	1	15	1	5	2	56	15
Control	mCTRL0203	GAGATTAAATTAACGCCGGC	461	29	0	0	0	0	0	7	0	0	0	0	0	0	0	0	0	0	0	0	0	0	0	0	0	0
Control	mCTRL0204	CGAATCGGGAAGGCGCGTGT	1495	465	2	12	17	2	11	4	2	1	8	0	1	69	1	0	31	0	1	0	0	0	20	3	0	0
Control	mCTRL0205	GGGACGCTCATCGAGTGACG	1804	670	18	16	179	5	34	34	44	6	32	12	3	9	2	0	3	8	1	0	9	7	5	2	24	128
Control	mCTRL0206	AGCGCGTAAGGCGTAGTTAC	2000	983	8	14	84	780	660	1	33	1	182	2	5	66	2	4	7	0	1	5	25	1	18	1	7	0
Control	mCTRL0207	GTTTCAGCGCGAGTTGCGCG	4905	1557	3	75	28	746	68	67	77	12	228	213	1258	65	27	2	6	6	27	22	286	8	21	8	854	163
Control	mCTRL0208	TCCTGCGTTCCACTCGTACT	7678	2768	454	1440	204	143	325	61	195	49	195	497	34	89	75	88	10	8	11	10	9	44	144	64	42	37
Control	mCTRL0209	GTTATTTGTCTGTCGAAACG	2067	445	1092	356	1394	338	41	195	163	754	65	16138	610	1858	6095	550	191	143	396	18	430	279	37409	3154	1812	354
Control	mCTRL0210	AATAAGCCTACCCGGCGAGA	1496	532	9	34	19	89	109	3	6	8	15	60	23	34	1	1	27	1	3	0	1	2	4	1	2	5
Control	mCTRL0211	GTACATGCGGCAAGTCGACT	3527	966	8	148	31	20	461	192	11	65	5	59	83	4	0	2	17	59	0	17	4	30	32	10	18	67
Control	mCTRL0212	AGCAGTTCGGGTAACGCCCA	2063	363	0	25	1	30	64	12	84	28	1353	431	54	107	5	0	0	47	6	5	0	671	5	0	0	4
Control	mCTRL0213	TGTACTCGCATAGCGGGGGC	3230	1027	193	1082	2221	591	721	260	441	6179	89	1462	2786	845	20	2089	57	187	62	284	11	2158	2790	28	19	228
Control	mCTRL0214	AACTCGCGTGGGAAGTCCGG	1943	1264	677	5122	220	19742	11424	22050	3755	16077	17859	5220	8328	42976	71288	59954	31410	18452	319246	7094	79449	48910	11905	188662	20138	26546
Control	mCTRL0215	CCTTGTGGCGTGCCAAACGA	2106	936	48	1300	42	238	61	5	24	24	11	38	429	102	18	4	89	9	2	0	726	11	558	54	21	12
Control	mCTRL0216	TGCCGACGCGACGCAGCGTA	4824	2230	297	46	113	137	170	496	882	24	404	1045	272	1452	31	408	21	60	1400	308	11	48	213	45	605	24
Control	mCTRL0217	TGCGGCAATGTTAACCCTTA	2652	1003	1800	14600	507	249	2713	871	67	272	555	240	886	337	19	11	89	435	13	170	38	33	12	4	67	260
Control	mCTRL0218	TGTATAGTCATCGCCGTAAT	5163	1836	3292	1946	8032	857	1990	702	1325	2278	468	576	121	1954	477	32	559	93	477	4283	4613	1042	794	481	2892	43
Control	mCTRL0219	TAGGCGGACGGTTACATATA	2719	620	5	16	192	5	14	28	18	64	0	17	41	4	0	0	2	2	5	21	29	16	4	0	4	19
Control	mCTRL0220	GATAAGACTCCGCGAGCTTC	1770	507	1	13	3	7	0	23	5	4	0	0	0	4	0	0	5	1	4	5	0	7	15	3	0	0
Control	mCTRL0221	TCGTGCCGGAATAACCACTA	2986	977	9	460	144	202	109	535	238	28	75	484	42	188	16	1	160	0	7	2	2	12	161	7	25	6
Control	mCTRL0222	CGAGTAATTATTTGCGGTCG	2082	579	4	51	3	0	42	25	5	1	0	2	8	10	0	1	28	0	0	0	5	12	7	2	5	12
Control	mCTRL0223	TACTTACCGACCGACAAACG	2562	742	2	10	10	69	303	0	7	2	543	38	6	108	3	0	2	3	0	0	0	3	4	5	6	0
Control	mCTRL0224	ATGGTGGCTGTACTCGTAAC	3667	910	25	82	63	4165	984	279	253	1044	93	733	468	2714	2098	18	47	645	135	94	48	27	118	303	300	29
Control	mCTRL0225	TCGTAAGTTCGCTATATGCC	6135	1096	143	57	78	191	36	308	80	74	10	596	71	65	8	13	12	195	0	24	2	9	5	2	33	2
Control	mCTRL0226	CCGGCTTGAATACCGTGCGG	1452	359	1	17	1	32	287	63	398	12	132	2	124	0	174	87	18	3	359	0	106	14	213	41	31	0
Control	mCTRL0227	GGCCCAACGAAACTAGCGTG	1601	272	0	1	15	0	169	4	10	4	13	0	25	0	1	0	2	66	0	0	1	6	4	1	0	0
Control	mCTRL0228	AGCCGCGCCGCAAAGCTTTT	2671	689	39	1	61	1	15	22	393	2	119	3	0	60	0	0	0	2	2	0	3	0	0	1	0	0
Control	mCTRL0229	ACACGACCGACCGGTGGAAT	2069	394	0	16	22	38	9	28	3	82	113	1	5	240	0	2	0	1	0	3	0	9	22	0	4	3
Control	mCTRL0230	AAACTCATACGTAGCGAATC	1525	450	105	396	166	4359	2168	1900	352	77	476	393	412	437	363	49	73	128	462	358	306	15	89	199	119	870
Control	mCTRL0231	CGATTGACGTTGGGCTCTCA	4635	1176	140	100	15872	302	344	542	130	40	137	1785	288	18	262	20	116	10220	55	28837	185	6675	4385	29	55	1625
Control	mCTRL0232	AACCAGCATTTGACCGCGCT	3270	511	3	7	91	31	103	40	12	28	1018	21	110	0	3	5	0	0	0	0	120	5	2	3	14	3
Control	mCTRL0233	ACGTCGGTCTAGAGTTAAGT	1730	726	5	9	151	221	20	18	43	151	2	2	21	46	9	6	6	0	14	0	1	0	37	8	2	0
Control	mCTRL0234	CTCCGGACGTGCATCCGAGA	3678	1909	417	14	21	39	870	18	52	155	19	28	41	75	45	10	23	7	11	2	16	5	7	44	6	16
Control	mCTRL0235	ATAAAGTCCCAGGTGCGCGC	2087	363	241	118	1107	350	722	18728	54	47	498	344	24	55	2391	26	55	550	5	341	2	238	71	23	55	17
Control	mCTRL0236	GCCGCTCTTGATAACGACGC	1658	345	3	38	30	187	1	2	121	251	31	2	62	0	0	18	3647	4	0	1	5	26	8	12	23	2
Control	mCTRL0237	CGAAACCATACCTCCTTCGA	3836	667	12	0	18	21	10	57	32	9	51	3	4	8	114	2	3	4	2	0	1	2	4	0	1	232
Control	mCTRL0238	CGCGCCTACCCTTTTACCGC	6861	1138	29	49	69	139	69	1579	83	1553	60	488	37	440	0	3	246	58	786	614	12	412	26	4	118	104
Control	mCTRL0239	TACCCCTCTGCGATGCCGGT	4391	1231	84	190	4127	94	751	47	296	83	102	8031	243	131	13	4	98	27	50	45	42	58	14	110	33	15
Control	mCTRL0240	ATATTGTCCCATACGATCGG	2445	365	16	55	0	103	4	6	0	0	15	0	8	0	0	0	5	0	0	0	0	0	0	250	0	19
Control	mCTRL0241	GGATTGACGAGACGATATCG	1326	195	50	40	137	32	117	27	394	952	46	1549	410	110	23	7	41	48	449	347	27	650	11	18	21	39
Control	mCTRL0242	CACGTAAGACGCTCCACTTA	2978	732	12	5	34	8	16	19	7	13	84	282	146	16	1607	18	7	217	50	6	2	2	8	12	2472	38
Control	mCTRL0243	GGAGTCTCACGCAATTAGCG	2399	478	3	3	27	1	0	4	1	31	7	10	0	18	2	0	6	2	22	1	0	1	0	9	0	1
Control	mCTRL0244	ATCGCAGGTCTACGCAGAGT	2552	810	334	11	147	26	15	5	125	36	69	3	29	7	2	22	49	1	4	7	5	9	4	2	1	3
Control	mCTRL0245	CGGTCGTGACAGACCTGGTG	2119	548	14	246	272	67	72	148	809	45	1350	47	42	912	58	1	26	55	3	102	17	23	9	4	23	5
Control	mCTRL0246	GCCACTCCGCTCGTTCTAGA	2933	824	100	55	481	57	179	362	201	32	27	148	64	1345	60	520	193	15	13	1566	2152	39	367	28	52	3166
Control	mCTRL0247	CCGTCGAGCAATCCCGCCAA	3242	2850	76	240	544	633	1898	130	182	45	822	816	229	674	16	11	316	9	23	12	9	31	180	8	10	17
Control	mCTRL0248	GAGTCGAGTTAATAACGCTC	977	315	1	138	0	22	1	2	0	1	2	0	17	44	34	1	12	149	3	2	1853	9	4	752	0	8
Control	mCTRL0249	CAATATCTAAGCGCTAACGA	1445	344	1	34	0	14	0	3	15	0	15	7	154	0	2	0	4	24	0	10	0	1	0	0	1	195
Control	mCTRL0250	ACCCATCCCCGCGTCCGAGA	3842	850	21	34	23	38	140	23	40	23	25	115	16	40	114	56	7382	385	4	3	106	10	33	8	58	3
Control	mCTRL0251	TAATGAGTAACGCTCATCGG	2302	799	1190	1102	1181	3530	763	2619	1450	4969	204	1429	1430	6496	5087	11901	1319	603	2815	946	3516	347	1645	4576	219	812
Control	mCTRL0252	AACGGTAGCGTACCCGTGAA	2544	667	4	555	498	0	10	1	10	11	5	1	7	4	1	0	2	2	4	13	14	12	0	0	10	1
Control	mCTRL0253	CATCGAGGGTAAACGCCATT	2846	748	11	39	4	37	13	17	12	10	181	11	24	148	3	0	9	2	5	17	0	0	1	15	4	9
Control	mCTRL0254	CGTCACCGCTAGTAATGATG	3067	764	1233	99	77	90	577	75	264	66	396	978	1	84	10	0	13	45	0	45	0	529	139	21	9	943
Control	mCTRL0255	AATCACCGACAACGTAAGAC	1268	394	2688	750	73098	3181	127	125	120925	543	32	46	1037	3320	0	1	206	67	18059	1094	58	1446	29	148	1	13
Control	mCTRL0256	CACTCAGCGGTTGGACGCCC	3058	458	4	136	70	16	9	1	9	9	35	610	3	7	0	0	5	3	2	1	1	7	30	0	3	27
Control	mCTRL0257	TCCGTAGGACGTATATATTC	1130	169	1	0	12	5	0	0	0	5	43	0	0	0	0	0	3	0	0	0	0	0	2	0	0	0
Control	mCTRL0258	AAAACGTAATTATACCGAGC	680	110	2	254	1	0	0	9	2	1	2	0	1729	0	5	0	0	0	0	0	0	0	1	0	1	0
Control	mCTRL0259	TAGGCCGCTCAGGCCGCACT	2589	878	4699	1143	3537	8051	272	2678	103	5635	289	15255	178	55	134	41	169	4080	89	117	138	123	476	36	303	37
Control	mCTRL0260	CCCACTTAATAACGCCGCTT	3424	857	228	54	20	42	407	1860	132	15	336	207	318	104	21509	20734	30	58	347	430	28	1197	1314	360	62	56
Control	mCTRL0261	ACCATACGGGGTCTTGTCGA	2827	278	17	790	121	1	3	2	20	0	3	9	5	2	0	0	3	3	0	0	5	1	1178	1	63	0
Control	mCTRL0262	ACGGAACCCGATCGGAACGG	1727	365	13765	8924	9061	8311	23914	4377	2263	37025	1085	8241	11591	12123	14720	957	80018	4429	144	4420	176078	14435	3993	1527	48836	8054
Control	mCTRL0263	GTTGCGTCCATTCCGTCGCC	3729	373	4	4	26	61	2	26	3	1	354	4	7	7	0	16	2	0	0	0	0	1	6	10	13	0
Control	mCTRL0264	ATTCCGTTTGCAGCGAGACC	3611	693	19	41	78	29	17	12	17	30	45	26	27	19	0	0	9	0	1	0	0	1	6	9	1	240
Control	mCTRL0265	CCATCGGTTCGACTTACCGC	5584	1431	296	8568	6104	894	2796	1005	3796	472	281	304	6122	5632	8907	200	1937	2590	13932	86	404	1351	2039	1316	332	978
Control	mCTRL0266	CATCGGCTATGTCGGGGACA	2659	569	25	98	27	24	34	2	102	0	7	17	1654	1	6	13	5	1	3	1	0	35	3	8	4	136
Control	mCTRL0267	AATGAGCGTCTCTCGATCGC	3133	906	11	15	2	26	13	11	54	15	285	1	66	10	0	6	81	5	10	39	51	10	23	0	8	2
Control	mCTRL0268	TTACTGATCAGTCGGACGCA	3190	760	5	62	380	805	205	19	42	9	627	107	10	8	0	4	63	0	2	1	114	16	123	3	5	59
Control	mCTRL0269	GATTGAGAAGCCGCGGTATC	1629	170	1	1	0	6	0	5	36	0	9	2	4	2	0	0	0	1	0	2	2	0	0	0	2	0
Control	mCTRL0270	GTGATGGCCACGTCCGAACC	2943	1040	26	120	146	50	12	27	112	72	15	222	15	26	4	5	0	10	1	0	15	7	116	3	2336	5
Control	mCTRL0271	TTGGACGTACACTTTCGTTC	4856	1307	162	573	79	473	75	17	85	41	112	6567	117	235	290	5	113	7	6	302	18	43	56	15	157	85
Control	mCTRL0272	ACTGCGCGTATAGGACGCAA	2171	573	12	0	0	35	0	11	22	8	104	2	28	9	1	3	18	38	0	1	2	1	1	5	0	8
Control	mCTRL0273	TAGCTGTTTACGCCGACCTG	4747	538	4	0	1	16	36	2	5	3	7	13	10	11	3	0	2	27	1	1	48	1	3	3	1	10
Control	mCTRL0274	CATGCCCGTCTGCGCCGCAT	7067	3008	1781	1325	1071	1851	1640	1889	1105	1610	2894	384	1117	468	208	86	1012	378	111	1738	439	1891	480	399	559	667
Control	mCTRL0275	TCAACTATGAACCGCCGTGC	4502	1052	53	19	1	62	22	10	1	123	39	7	10	20	1	2	17	2	3	10	0	27	4	1	295	12
Control	mCTRL0276	CGTTACGTTTCTTGCCAGGA	3904	1129	6	50	73	287	194	97	495	10	38	8	54	58	170	1	171	2	4	1	1	5	30	7	2	85
Control	mCTRL0277	TCTATATCTAGTCTCGGCGC	2384	297	0	8	10	5	16	4	12	0	1	7	34	232	0	1	1	0	8	0	0	0	4	1	0	0
Control	mCTRL0278	CTCCTCGAGGCTGGCTACGT	5483	2046	570	537	2294	1563	264	709	952	106	4696	355	527	352	55	145	69	2599	57	354	3630	104	187	133	38	59
Control	mCTRL0279	TCGTACCGCACGTGTAAGCC	4815	1554	36	39	76	375	211	25	106	15	82	87	39	99	2	12	26	15	7	779	8	198	130	10	2	25
Control	mCTRL0280	CGGGCACTAACCCGATACAC	3239	1471	397	8239	2027	825	117	77	546	4050	2748	2013	4377	154	68	215	25308	166	10	66	50	784	271	772	99	5801
Control	mCTRL0281	GAACGTAACGGCATGCATCA	2430	949	791	202	216	2185	2076	1839	257	142	924	744	457	242	9	15	39	282	41	9	408	724	705	25	155	74
Control	mCTRL0282	GCCCGATAGAATTACCCATT	2605	552	5	159	7	12	31	51	26	93	7	13	8	38	6	18	2	2	2	10	57	16	20	9	5	5
Control	mCTRL0283	GCCCTCGAGCTCACGATGAG	3403	711	13	45	6	90	31	18	91	26	66	346	21	216	1	5	43	2390	53	18	261	22	9	2	2	2
Control	mCTRL0284	TTAGGACGTGCTTCCGAGGG	2721	1890	412	222	212	185	1044	58	1455	1025	1134	158	740	351	28	7	33	36	17	14	303	27	55	12	27	9
Control	mCTRL0285	TAGTTAACCGTAAAGTGGGC	1814	187	3	5	0	0	3	0	11	1	0	174	0	0	0	0	0	7	0	13	0	2	0	2	0	0
Control	mCTRL0286	GTGGGCTGACCGTTCTCGAC	3365	1075	12	57	73	23	133	42	57	99	17	65	235	30	18	8	13	1433	15	24	42	43	82	18	36	48
Control	mCTRL0287	CAAGAGTTAACCTCGACCGG	1235	388	112	11	20	6	2	30	2	7	587	5	0	18	3	586	45	0	1	3	1	52	53	2	6	2
Control	mCTRL0288	TATGACTGCACGACTCGCTA	2709	808	21	1889	25	466	694	336	200	140	369	2344	75	22	5461	15792	593	27	12	1270	27876	792	2024	107	6496	7522
Control	mCTRL0289	GAACCGGCGTGCGTTAGCGG	3062	1777	7551	2600	5761	808	17465	499	6487	7183	8777	5676	3171	10312	230	8	1035	2083	62	29	118	103	209	12	254	2097
Control	mCTRL0290	TTCGATATAGGGGACGGCGG	2530	454	0	24	2	1	0	6	32	2	3	1	54	5	4	5	0	0	0	0	0	0	0	2	0	8
Control	mCTRL0291	GCCGTAAGCGGGCCGGTTGA	181	17	0	0	0	0	0	0	0	0	0	0	0	0	0	0	0	0	0	0	0	0	0	0	0	0
Control	mCTRL0292	CGTAACCGGAGATAATATTA	1197	267	32	206	566	227	65	13	8	86	477	830	28	100	7	12	0	28	0	2	0	2	7	7	2	60
Control	mCTRL0293	CGGCGATAACAGCGACATCG	1450	164	1	0	0	2	12	3	3	3	1	4	1	4	1	0	1	0	0	0	3	1	1136	0	0	7
Control	mCTRL0294	TCACTTCGGGCATTACGAGC	2781	517	12	27	27	62	18	21	119	1	54	11	21	28	1	0	10	0	8	3	0	0	4	7	1	7
Control	mCTRL0295	TAATAAACTATGTCCCGCCG	2972	443	0	11	50	0	3	0	0	5	11	103	10	6	0	0	3	0	0	0	2	0	1	0	0	0
Control	mCTRL0296	TGGCACGGAGTTGCATACGC	3569	1651	1932	660	626	1206	877	1070	1223	1911	1083	528	1321	692	412	43	416	321	101	229	10	392	174	167	75	44
Control	mCTRL0297	GCTAGTTCTCCCGGGCGAAA	1185	158	0	57	0	8	2	1	1	1	4	0	2	2	0	0	0	0	0	0	0	4	2	0	0	0
Control	mCTRL0298	GTTCGGTTGCAGCTTACACG	5165	928	19	28	27	9	14	5	12	14	43	8	41	89	1	7	2	69	1	1	6	417	2	5	15	8
Control	mCTRL0299	GCACCTCTAGCGCGCTCGGC	3334	684	14	164	34	179	915	499	144	12	17	21	32	11	30	9	6	556	14	4	8	61	5	4	172	9
Control	mCTRL0300	CATTGTAGACTCGTACGGAT	2851	323	35	7	1353	649	179	6	121	3578	275	7	962	979	1	0	33	1	7	1	0	16	5	7	5	6
Control	mCTRL0301	TCGGAATTCCGCAGGCCGAG	2001	438	74	8	4	3	13	14	1	0	1	7	7	13	1	0	0	12	0	0	0	9	0	0	1	0
Control	mCTRL0302	GATTACGGGGTTCCGTAACT	1326	392	0	0	10	13	10	1	0	6	104	0	7	26	0	0	3	0	0	0	3	0	7	0	1	1
Control	mCTRL0303	GCCTATGTGAATCGCGAATT	2829	955	2	29	1207	15	9	5	32	13	7	13	130	3	1	0	0	0	0	0	1	0	0	1	5	2
Control	mCTRL0304	CTCGGACGGCATACGACAAT	2914	915	33	201	1695	231	730	202	45	766	120	355	84	1011	25	28	569	401	126	69	1	27	501	19	368	6
Control	mCTRL0305	CATATGCTCGACGGTATAAA	1088	136	0	2	0	7	2	1	1	0	0	0	0	1	0	1	0	0	0	0	0	0	4	0	0	0
Control	mCTRL0306	CTCATGTACGCCTTCGCTAC	6406	1342	1336	913	355	1002	861	346	4864	2450	613	486	338	4681	39	123	1281	843	4409	2629	209	413	96	316	7173	754
Control	mCTRL0307	TTACAGTTCATACCGTCGCC	5492	1552	211	545	5505	704	1879	887	1268	4476	306	7024	2841	561	322	102	3017	332	1693	1285	1248	2276	5116	735	182	91
Control	mCTRL0308	GATGGCCAGTAACGGCGTCA	2325	412	3	639	3	38	28	1	3	2	14	3	6	0	4	4	25	1089	5	89	2	967	3	0	23	4
Control	mCTRL0309	ATTTGAATGCTCCCGTCGAC	3621	899	4690	6278	18849	22609	6310	12531	6945	13518	33611	23300	3741	19879	48533	39242	9134	18660	22075	5844	25519	27344	9642	8455	6649	3749
Control	mCTRL0310	CAACGGTCACGCTAGAATAA	1319	406	316	5987	267	326	44	21	84	9	111	43	150	12	4	2	8	94	1708	160	111	26	21	7	11	1930
Control	mCTRL0311	CTTAAGTTCGCGACGGAATG	2737	539	4	0	18	98	16	10	80	60	31	2	7	4	0	0	3	1	0	2	0	3	0	0	1	2
Control	mCTRL0312	TACTTAGGTCCGCGTAAAGC	2790	757	56	16	239	23	12	21	433	36	199	19	15	21	1	0	4	22	4	3	0	202	20	7	0	63
Control	mCTRL0313	GGTTAAAAATTAAGCGGTCC	726	326	2	2	0	1	1	3	0	18	3	0	0	3	0	0	0	0	0	1	0	0	7	0	0	3
Control	mCTRL0314	AAAACGGCTCGATCGGTGAT	1384	175	1	0	0	3	0	0	1	0	2	3	20	2	0	0	0	0	0	0	0	0	0	2	0	1
Control	mCTRL0315	ATGTTACGTACGTGATCTCC	4289	1490	3183	4870	4164	3295	1769	10797	9057	11251	988	13293	21351	1687	1175	5701	2232	2912	461	27744	1256	2267	27026	639	3738	1790
Control	mCTRL0316	AGTAGACGCTATGTTCGCGC	2958	490	1229	639	1573	200	908	282	275	394	70	17442	749	2329	5798	617	204	284	380	34	525	1041	36756	3547	2001	338
Control	mCTRL0317	TACTGCGTACCGCAGTAAGC	1138	429	8	52	25	15	7	1	12	3	128	15	0	11	0	5	2	1	6	11	0	2	3	2	7	5
Control	mCTRL0318	CCCATCATTCGCGCTGACGT	6192	1651	433	106	581	1280	107	65	66	4815	244	37	383	95	33	273	7	8	33	165	4	45	232	21	67	96
Control	mCTRL0319	CGACTATTGCCGTCCATCTC	6261	1948	2656	511	7307	188	1226	773	292	686	47	68	3015	73	68	194	9	21	713	23	140	17	44	9	85	1773
Control	mCTRL0320	ATCCGTACCAAACACGCTAC	3221	454	1081	70	35	49	941	18	274	866	39	50	28	58	42	299	29	110	79	108	356	47	6	10	14	3
Control	mCTRL0321	TGCGTAAAACTTGCGCTCGA	1833	307	1	8	3	0	6	15	4	9	701	6	5	6	6	12	2	7	86	1	4	4	5	3	9	1
Control	mCTRL0322	CATATGCCTATAACCGGCGG	1855	253	2	0	0	3	0	1	1	2	0	2	1	0	0	2	1	4	0	0	0	0	0	0	0	1
Control	mCTRL0323	GTTCCGGATATATACGGTTA	1682	479	125	9	25	18	0	7	2	3	154	98	13	0	124	6	2	0	2	2228	10	2	5	0	56	9
Control	mCTRL0324	CTAATACACCCGGACGGTAC	2874	508	0	31	16	10	0	4	3	32	0	12	10	0	2	12	42	10202	60	7	6	13	14	0	0	0
Control	mCTRL0325	GGGCGGGACGTAATATTATG	1406	391	12	11	2421	36	0	65	9	3	22	4	9	7	0	0	1	3	0	10	3	5	9	3	0	8
Control	mCTRL0326	ACTTTACATCATGTCGTCGT	2192	626	81	768	1203	846	3901	400	191	184	853	518	4756	90	22	4	89	162	31	47	6	1005	191	18	88	166
Control	mCTRL0327	CTGATCGGTGCATATCTCGG	4476	1626	30	184	2477	322	16	83	233	362	66	112	80	867	43	2	6	10	12	14	21	34	531	2	3	3
Control	mCTRL0328	GAGCCCCAACGCGCGAAGCA	1296	271	1	66	5	106	4	3	0	25	30	3	32	258	1	0	8	0	1	0	1	9	11	0	35	7
Control	mCTRL0329	GCTAAGATTCATCCGAACAC	1628	232	0	6	83	0	1	2	0	2	0	1	130	0	0	0	0	3	0	0	0	0	0	0	1	0
Control	mCTRL0330	GTTACCGTGACGATAAGAAT	1972	439	2	2	1	3	33	3	14	0	174	12	5	31	0	0	7	1	0	1	0	0	12	2	1	0
Control	mCTRL0331	GCTAAACGTATTTTACGGGC	1399	349	8	9	47	38	15	12	2	0	1	92	1	23	3	0	0	2	2	1	0	0	0	0	0	0
Control	mCTRL0332	CCGAGCCGAATTGGGCGTGT	1616	298	6	3	8	25	27	2	12	0	0	1	91	1	0	1	0	2	0	0	0	0	0	0	0	19
Control	mCTRL0333	GTTGCGTGTGTCCGTACAAA	1975	542	5	11	8	70	720	2	13	129	46	4	2	1	0	0	16	1	527	0	0	101	9	1	4	3
Control	mCTRL0334	CTTTATTCCGTTGCATGTCG	7845	1465	502	216	830	52	1545	106	117	91	172	67	846	98	81	10	17	9	17	28	19	216	2320	14	50	136
Control	mCTRL0335	AAGCGTACCCCACTCGTTAA	3166	564	19	29	12	25	1579	8	9	275	241	44	292	60	4	2	2	0	0	0	0	1	12	14	0	4
Control	mCTRL0336	ATCCGAGATCTGCGAATTAT	2630	462	30	7	0	73	7	9	62	5	5	12	10	3	0	3	2	20	1	7	2	3	5	2	0	0
Control	mCTRL0337	TCTTGACTCCGACTTCGGGC	3975	789	41	574	338	138	80	23	764	139	133	281	373	265	21	9	232	26	123	304	14	46	30	184	351	507
Control	mCTRL0338	ACCATGATGTCACCGCCGCA	4062	1021	7343	594	3969	676	409	111	224	538	343	7307	6418	366	364	366	765	405	7	176	5	4737	174	203	388	6843
Control	mCTRL0339	TCAACTTAACCTCGAGTCCG	3973	907	37	24	189	86	93	659	290	169	19	10	363	179	1062	33	2752	126	9	2	14	71	356	10	25	165
Control	mCTRL0340	CTACGAGGGCCGCGAGCGGT	356	28	0	0	0	0	0	0	0	0	0	0	0	2	0	0	0	0	3	3	0	0	0	0	0	0
Control	mCTRL0341	ATGTGTCATAGCGGCGTAGG	2236	635	7	4	11	57	1	0	34	3	1	2	7	4	2	1	1	52	1	2	0	1	13	2	4	0
Control	mCTRL0342	TGTAACGATCTGGGCGGTCT	5115	1261	508	33	110	94	25	12	45	394	98	7	132	47	6	3	11	5	4	8	117	59	222	5	19	23
Control	mCTRL0343	CCGGATCGGCTACGCTACGG	3255	730	16	29	7	12	4108	12	94	2	13	159	46	33	0	0	4	4	4	4	1	7	133	1	0	0
Control	mCTRL0344	CAATATTCGACCTACGCTCC	4610	820	22	4826	76	72	365	833	711	2074	8	98	377	57	144	55	12	220	799	6555	51	1262	525	5668	9	1849
Control	mCTRL0345	TGATAAACGATGCGAACTCG	2691	1134	180	35	325	72	145	1496	61	101	663	200	118	26	7	1	22	77	2	120	42	21	22	12	1	11
Control	mCTRL0346	TGATTGGGGGTCGTTCGCCA	4994	1096	52	298	47	300	1619	39	62	229	4086	175	253	60	17	7	41	4481	37	13	40	116	205	1052	202	9
Control	mCTRL0347	TAGTCAGTCGGCCTCCGTGC	7203	1310	21	493	68	37	658	549	108	279	4581	53	432	96	22	3	39	14	4378	2199	126	205	2017	21	532	338
Control	mCTRL0348	AACCGGCTGCGCGTTTGCAA	2834	582	27	3186	17	182	465	1138	102	2907	19274	374	3597	98	7	53	37	372	15	82	38063	53	407	30	3	23
Control	mCTRL0349	GTGCCTGATAGTGTGAAGCG	1699	431	7	196	13	18	364	350	46	35	8	119	174	28	3	10	21	3	7	8	1	33	7	558	44	388
Control	mCTRL0350	CGACGACCCATTTCGGTTAT	5068	1456	293	1085	81	132	612	46	15396	534	52	9831	558	138	294	519	35	25	613	44	23	546	4551	158	2785	1869
Control	mCTRL0351	GGGGGGTCTAATACCGATTG	1	70	0	0	5	0	0	0	0	0	16	10	0	62	150	2	0	1	0	0	0	0	3	0	0	1
Control	mCTRL0352	TTTTTAGACCTAATTCGCGC	3023	524	181	78	95	48	52	76	55	29	6	49	159	28	40	6	47	9397	14	61	3	224	12	328	7	198
Control	mCTRL0353	TCTACACGCGCGTTCAACCG	5152	1192	143	624	24	347	123	247	182	5	17	29	320	214	25	0	0	0	509	10	5	16	21	2	32	6
Control	mCTRL0354	CGGGGCGTACATGTGTGGCC	3685	957	618	870	52	827	95	83	24	209	1249	401	150	306	19	40	31	4	0	29	132	16	613	238	5	17
Control	mCTRL0355	CGACTCGCTTAACCGTGCAG	2276	824	102	111	658	989	68	467	396	884	1443	2645	386	412	130	90	305	28	30	35	10	73	1255	32	14	15
Control	mCTRL0356	GCGTACCTATCGATAAACCA	2106	464	83	161	195	759	252	110	69	98	215	29	38	28	4	0	12	0	5	7	4	490	20	5	24	20
Control	mCTRL0357	ATATGAGCCCGACCTCTCGA	3076	1083	10	10	17	407	41	17	90	6	4	2046	25	7	6	6	4	1	27	22	4	56	53	24	10	517
Control	mCTRL0358	CGCGCCGAGGGCCTCGTTAC	6134	1154	3057	536	88	103	120	208	241	257	166	185	930	42	68	10	14	419	712	12	4	99	161	20	100	676
Control	mCTRL0359	CTCCGACGACTACGCAAGGA	1531	437	10	1195	655	31	4	9	14	8	42	13	1994	6	0	4	7	1	171	0	0	2	0	1	1	3
Control	mCTRL0360	TATCTCTGGATGCCGTCGGT	1813	320	21	5	2	142	44	12	5	1	32	130	6	37	1	1	0	22	11	2	0	2	0	19	2	4
Control	mCTRL0361	TTTCAGTTGTCGCGCGACTC	5671	1017	823	30	12	119	20	39	56	2	8	75	209	34	71	4	78	7	1358	11	1	324	19	2	2	47
Control	mCTRL0362	AGTTTACGTGGTCCGATGTC	4206	642	16	19	6	38	56	7	36	62	358	14	28	3826	30	3	14	1	6	1	5	18	23	0	565	5
Control	mCTRL0363	GCGTGACGCGATCAAACGGT	1153	370	43	10	103	6	3	13	4	0	16	2	158	8	0	2	0	0	10	18	1	1	9	1	0	2
Control	mCTRL0364	ACTAGCTCCATAACGTGTAC	1002	132	1	2	0	0	1	0	2	0	0	1	0	0	0	0	1	0	0	0	0	0	0	0	1	0
Control	mCTRL0365	CGCATAGTGTACCGTTGCGC	2940	712	155	31	345	5707	530	21	13616	33	86	8	251	26	42	120	64	48	101	15	66	240	7	9	66	28268
Control	mCTRL0366	CCGCTTGGGCGCTATTAATT	2462	642	21	170	150	65	363	63	40	21	178	253	1137	239	27885	3494	18	927	24	3967	954	3006	37	24	104	313
Control	mCTRL0367	GCTTCATTATTAACCGGCGT	1961	788	4199	14124	1791	8592	12799	8279	6411	11983	19468	20335	21001	30844	7674	16753	6804	5455	1286	4890	254	48055	10947	27726	6110	15989
Control	mCTRL0368	TATACTCGCCTGTCACAGCG	4703	838	11	31	62	3	26	6	179	2	7	31	161	27	10	12	4	3	7	4	4	10	10	3	2	698
Control	mCTRL0369	ACGCTGTTCGTAACCGCGGG	2286	885	509	240	798	562	15928	165	977	225	2	157	134	387	6	5	24	34	87	390	12	786	10248	4	20	22
Control	mCTRL0370	AGACGTTGATTTACCGGCCA	3024	567	38	1	5	9	8	24	9	15	0	18	2	2	1	169	0	0	66	2	4	6	604	5	5	6
Control	mCTRL0371	AACGGTCAAATCCGTGAGGG	272	45	0	1	10	0	0	0	0	1	7	0	21	0	0	0	0	0	0	2	0	0	0	0	0	0
Control	mCTRL0372	CATAGCAACGCCCAAACTCG	2568	645	9	62	5	12	0	0	10	267	0	1	0	55	0	0	1	3	0	1	1	1	3	0	0	0
Control	mCTRL0373	CGTCAATGTGTCCGGACGGT	2158	437	8	9	1703	2	26	3	27	98	86	1	3	35	0	0	14	1195	0	0	12	3	29	4	1	0
Control	mCTRL0374	ACTGTCCCATTGTACGACGG	3147	823	4549	11693	468	3951	14522	643	1086	13300	320	295	17703	413	19037	658	20671	220	7121	121	385	1570	6898	754	147	1261
Control	mCTRL0375	CTATCGGCCCGCAGTGATGG	5613	1532	165	98	7253	54	64	36	1976	88	93	32	277	217	13	5	38	20	19	1	31	29	4961	77	98	57
Control	mCTRL0376	GATCGAGTGACACCCACCCG	2200	617	9	848	60	2192	17	24	64	2	724	6	329	4	18	1	215	4	11	3	4	12	37	1	0	106
Control	mCTRL0377	TCCGCGGCAACGTTTGGGTC	6830	2119	1988	748	1018	974	2567	3162	1056	860	55	1443	1082	574	8222	385	2063	9758	6732	3815	1282	192	27750	733	31356	121
Control	mCTRL0378	ACTTGTATACGACGGCTAGA	1688	249	1	3	1	3	0	3	9	0	130	22	2	0	1	0	0	5	1	0	0	1	1	4	0	0
Control	mCTRL0379	TTCGACTGCGCACGCCATGA	6956	2172	909	3679	1126	2203	1056	863	1585	1426	2704	3822	2863	770	142	98	325	1348	23268	371	758	257	2186	2157	357	206
Control	mCTRL0380	AGCATGGAGTCAACGTCCGC	3172	476	10	45	0	12	16	0	1	2	0	7	59	0	5	1	5	1	1	1	0	2	1	0	0	2
Control	mCTRL0381	TGACTTGACACGTTCGATAT	3078	1482	681	2803	282	17152	719	261	316	930	805	1931	1122	423	155	188	2359	608	37	61	65	146	68	195	282	217
Control	mCTRL0382	CCGGACTTGTTATACTTGAT	2192	636	8193	5336	5739	5180	15463	3135	1187	25420	654	7959	10651	11255	12958	800	70594	4036	148	3966	155852	12271	3832	1367	48737	8289
Control	mCTRL0383	GTACCATGATAACCGTACTA	704	180	1	0	87	1	0	1	63	0	0	3	0	9	0	0	2	0	0	2	61	0	4	1	2	0
Control	mCTRL0384	CACCGCTGCCCTAGTACCGG	5508	2108	453	781	818	2965	385	788	974	1222	282	662	622	421	325	93	4475	619	158	1588	72	281	310	151	112	752
Control	mCTRL0385	GGATATTCGCGCGGTCTTCA	2486	427	13	4	2	10	2	1	210	16	6	3	1	1	0	1	8	15	0	2	2	15	0	12	3	2
Control	mCTRL0386	AGGCAGCCCGCGTTAGAGAT	1677	423	0	0	0	0	4	0	319	1	2	0	0	3	0	0	2	0	0	2	2	1	3	5	0	0
Control	mCTRL0387	TTCTCCATACCGTAACTCCG	6360	1541	2456	546	299	854	2319	696	2300	342	519	943	170	872	86	66	355	1591	360	3637	128	663	60	58	260	202
Control	mCTRL0388	ACCCGCATATGCCGCCTAAG	2706	633	3	21	0	6	113	6	7	7	689	24	51	0	1	0	0	1	2	0	18	0	5	3	0	6
Control	mCTRL0389	CGAAGTACACGGTTCTCTCG	2711	794	29	49	29	66	143	10	48	3	62	12	40	10	2	25	17	4	371	13	19	13	4	2	5	6
Control	mCTRL0390	CACAATACGCGGCAGAGGTC	2230	559	2	15	1	33	5	59	6	2	0	4	19	2	0	0	2	1	2	36	1	54	287	0	0	2
Control	mCTRL0391	TGAGACCAATGCCGCGGAAT	3300	1460	163	226	208	610	298	156	916	1179	338	1628	669	1146	53	14	510	2093	607	781	19	778	267	139	136	457
Control	mCTRL0392	CTCGACCCAGTAGTAGACGG	1442	270	8	2	36	1619	5	1	0	19	0	0	13	9	0	1	62	3	16	7	0	3	0	5	0	14
Control	mCTRL0393	CGTACCGACAGTAGTCCAAG	1924	686	22	28	43	19	40	47	790	7	2570	3759	109	143	21	1	39	9	4232	2278	87	165	1892	44	513	658
Control	mCTRL0394	AATTGTCTGATCGCGCCATA	2157	605	19	631	8	171	14	6	48	7	70	105	108	3176	6	3	15	4	3	4	14	20	80	13	23	2
Control	mCTRL0395	TTTAGTCAGACGAGCCGGAT	1576	221	1	5	2	2	0	1	50	6	2	16	1	6	0	1	0	1	0	0	2	1	1	16	1	3
Control	mCTRL0396	TGCGCGTCCTGTTATGACCG	5565	1817	114	2019	78	1638	817	966	2585	253	766	488	504	1685	73	14	167	6598	39	34	259	352	149	876	38	23
Control	mCTRL0397	CTTATCGATTTGGGTTCAAC	3505	1292	291	52	1554	147	373	158	75	14	2245	331	34	143	10	1128	153	3	29	161	7	5192	53	24	17	31
Control	mCTRL0398	AACATGTTAAGTCGCGTTAT	2395	502	10	9	1	52	28	33	8	13	0	1	14	136	0	1	2	0	0	2	4	1	0	0	0	13
Control	mCTRL0399	TACGACATCGCATGGTAACG	1980	277	3	4	1	3	0	6	18	0	1	2	1	3	5	1	3	0	4	1	0	0	0	1	0	18
Control	mCTRL0400	CAGCTGACCGTTAATCGATA	2592	609	55	9	44	837	99	27	338	35	98	311	301	485	9	15	4	1	4	21	101	14	3	11	0	7
Control	mCTRL0401	TACACGCCCTAAGCTAGTAA	2372	681	33	13	1	1	160	79	9	100	4	11	18	97	19	3	1	9	6	5	0	0	6	8	0	3
Control	mCTRL0402	CCGACTGCCGAGCTAGGCGT	1678	665	207	10	620	13	6	124	3	68	9	7	19	58	0	0	0	114	4	0	6	8	3	0	2	1
Control	mCTRL0403	GTTGCGGCGACCTAGATATC	2863	627	61	75	22	4	3	35	6	5	21	9	21	48	5	0	3	2	2	2	3	5	25	2	1	8
Control	mCTRL0404	TAGACGTCCACCGACTCTGA	2927	732	31	742	4	135	173	67	53	3	5	22	327	6	16	23	7	3	16	2	1	10	8	43	1	7
Control	mCTRL0405	TCACGCACGACTAAGGGAAT	1628	850	1	262	15	11	27	7	4	0	32	26	16	22	6	863	8	264	7	7	5	0	6	4	2	319
Control	mCTRL0406	GCTTATCGTTCCGCTACGAT	4237	1658	10	135	62	402	160	56	27	177	162	655	257	1030	31	0	109	522	153	18	2	9	10	20	146	7
Control	mCTRL0407	ACCGGTTCAGCCGCCGGAAC	2133	730	9	20	2	8	17	9	28	3	158	33	301	164	1	0	3	9	0	0	3	25	2	4	27	2
Control	mCTRL0408	CTACCCGTCTATTACGATCT	4433	849	17	63	0	37	42	4	92	18	66	14	118	33	5	3	155	1	3	4	4	9	3	5	0	10
Control	mCTRL0409	TGTCGCCGATGGTCAGTCGC	7125	2203	131	220	948	1434	225	104	372	844	77	405	93	120	7	328	10828	606	34	96	54	39	572	6	12	862
Control	mCTRL0410	CGGGCGGTAAGAGCTCTACG	1155	248	0	0	0	0	8	0	1	1	82	0	9	2	0	0	54	1	0	2	2	3	5	1	0	0
Control	mCTRL0411	GGCACCGTTCGGAAACCGAC	2087	487	9	52	2	176	262	2	11	0	33	4	0	11	2	0	6	1	9	42	72	1	10	2	0	1
Control	mCTRL0412	TCTCGAATAAATTTTCTCGC	2054	297	0	0	22	170	2	9	0	2	4	4	0	15	14	0	0	2	2	0	0	4	2	11	0	2
Control	mCTRL0413	GCATTCTTGAGCTCCGCGCC	5619	1577	105	25	153	44	50	65	30	43	1898	69	1140	83	18	631	188	9	3753	9	18	59	1378	10	53	116
Control	mCTRL0414	ATTCGGACCGTTATCTCACC	4613	1191	174	55	1448	105	66277	545	285	3845	31	229	707	59	9	58	37	4238	30	1762	11381	1285	26	63	288	33
Control	mCTRL0415	GTTCTTCAAAGACGGGCGGC	1054	223	1	0	0	56	2	36	20	28	1	5	0	29	0	0	0	0	0	0	0	1	0	0	0	0
Control	mCTRL0416	TTCCCCGCCCGTGCGGTCAT	7411	2625	481	851	5468	4403	1937	371	4388	112	1294	571	323	2452	37	1730	49	860	78	178	47	1644	331	1528	263	1711
Control	mCTRL0417	TAGTAGGTTGATCGCGTCGC	4439	1237	17	64	528	63	20	18	83	21	316	96	161	5	0	117	6	0	298	3	4	12	18	183	23	4
Control	mCTRL0418	CGCTCGGTGACGTATACACG	2800	936	86	73	1157	121	54	81	184	124	9	96	24	238	14	1	161	122	56	0	9	42	12	1	11	4
Control	mCTRL0419	ATTATAGCAGCCCCCCGAAT	1856	259	1	6	23	25	9	0	50	1	18	0	61	2	8	0	4	4	2	7	0	234	2	3	2	0
Control	mCTRL0420	CGGTCAGTCGTCTTCCCGGA	3022	1632	6	61	64	21	187	40	84	10	13	13	163	196	0	2	37	0	55	2	2	13	1	16	2	5
Control	mCTRL0421	TGGATCCGCTTCGCACGGCG	3062	1039	10	7	4	42	12	1	448	38	19	30	2756	57	24	1	26	3	51	3	2	246	7	5	5	58
Control	mCTRL0422	AAACCCCCGCGCGGAGCGTC	1587	179	0	0	13	0	0	0	0	0	0	1	0	4	0	0	0	0	1	0	0	0	1	0	1	4
Control	mCTRL0423	CATAGATCCGCGATTGTACG	1953	420	35	13	111	1486	1	56	148	39	21	143	45	2608	50	97	210	166	82	424	1920	2134	27	377	350	20
Control	mCTRL0424	GTTTCAGGAACGACGGCGAG	1513	431	172	64	141	580	2298	6	97	2649	8	16	2494	407	3061	45	124	454	10	2913	13	57	270	1	17	33
Control	mCTRL0425	ACCGTCTCTATTATACGGCA	1861	841	4594	9414	7411	1507	2625	941	4706	16226	2689	5432	462	475	3457	1282	10671	963	6014	70	4415	1659	13792	4677	23315	2092
Control	mCTRL0426	TGTTCGCCCTCTCACGATTG	4517	1499	339	250	700	418	881	377	711	583	1004	1156	317	182	124	851	281	55	92	110	1087	310	452	62	93	125
Control	mCTRL0427	AACTAACTCACTACGCACGA	2340	448	1	4	15	21	140	4	387	1	1	12	44	4	39	4	7	11	0	3	8	2	3	1	1	5
Control	mCTRL0428	TCGCTCCGCTAGTAGTGGGT	2637	807	160	1744	134	6209	234	221	78	171	383	93	6213	584	37	28	3718	106	842	916	14	207	1400	10	45	1078
Control	mCTRL0429	TCGGCGCAGCCTAATGTATA	1824	838	22	2005	18	32	78	5	21	6	3	18	149	37	67	6	8	2	0	87	0	14	14	3	1	4
Control	mCTRL0430	CAACCTGCCTAGCGACCCGC	5275	962	5	108	70	33	92	5	117	21	111	16	37	10	0	0	19	0	14	28	3	6	61	5	2	43
Control	mCTRL0431	GTCGGCTCATCGGAAAATAT	1216	317	23	1011	21	1237	90	544	64	304	3322	112	22	2226	45	2274	84	0	10	538	5	163	192	5006	11607	69
Control	mCTRL0432	GACAGTTGACGCGACGGAGA	1139	382	0	9	40	15	0	18	7	0	98	4	13	1	0	0	0	3	1	2	0	3	0	9	0	6
Control	mCTRL0433	CCCTGATGTGCTATACGCGC	3654	1326	365	1682	109	692	1196	346	255	105	337	52	333	306	80	11	333	26	7	122	11	19	287	52	49	467
Control	mCTRL0434	TAACCCTTGATCAACCGATA	1771	549	29	91	138	320	231	325	5127	962	2148	696	50	550	78	2	245	16	229	237	50	16	2500	203	57	253
Control	mCTRL0435	CTATTGGGAGCGGCCTCTCG	3253	849	120	20	43	21	22	191	3828	7	138	44	6	108	25	0	3	400	30	0	42	5	1037	0	68	221
Control	mCTRL0436	GCTTATCGTCATGCGGGTGA	2653	938	9388	1155	110	233	9121	1091	2097	633	308	79560	234	7354	89515	4333	61253	10626	137	4888	1963	23216	76	611	57	17863
Control	mCTRL0437	TGATGCCGGTACCCGTAACT	4695	1669	65	4291	87	4673	640	2965	98	2104	32418	1207	200	19748	920	13893	487	19	22	41	39	988	986	40325	95207	620
Control	mCTRL0438	GGCGCTACTGTAATGACGGT	1014	257	8	0	2	14	265	1	0	1	2	3	2	13	3	1	1	1	1	0	0	3	44	1	1	1
Control	mCTRL0439	ACGGATTGCTGACGCTATCA	2548	634	7	37	4	7	32	0	15	20	549	2	4	534	3	0	5	0	6	1	34	10	2	1	10	7
Control	mCTRL0440	TAATGCGAATGCGACCTCTC	4070	729	67	460	3	10	113	12	45	198	35	40	79	5394	0	4	44	4686	13	360	8	49	60	11	120	40
Control	mCTRL0441	TTAACTGGGGGGACCGGACG	1489	243	38	13	1	17	3	1	23	0	1	2	47	10	1	1	0	93	587	3	0	0	1	0	0	0
Control	mCTRL0442	CGCAGAGTTCAAATCCGCGC	1335	474	59	54	0	141	55	2	9	7	2	10	16	2	0	0	0	2	0	0	0	7	4	0	0	0
Control	mCTRL0443	TGTTTATGCGGAACTTCCGC	4877	2397	154	234	1342	56	51	78	167	416	52690	2499	117	110	18	82	112	26	22	143	31	762	153	14	15	21
Control	mCTRL0444	ACAGACCGAATAACCGACGA	1493	166	3	0	0	0	0	0	0	12	15	10	2	46	0	0	0	0	5	0	7	0	0	0	0	0
Control	mCTRL0445	TGACGCTAAGGCCCGCTAAC	4206	1282	200	219	327	111	519	158	152	89	201	491	181	86	53	135	307	113	957	34	200	110	672	383	45	160
Control	mCTRL0446	ACTCGCGAAACCGTACATGA	1463	279	1	0	7	1	8	0	20	46	1	0	1	5	0	0	2	3	0	0	2	9	11	0	0	1
Control	mCTRL0447	ATAGGCGCACGGGCTACTCC	3835	1347	351	1433	13365	483	2557	656	4725	4871	2732	695	5727	507	68	410	25665	1817	455	2657	1477	798	563	844	97	6333
Control	mCTRL0448	AGATTCTCGCGTAACCAGAG	762	74	1	0	0	4	0	0	1	0	9	0	0	0	0	0	0	1	0	0	1	0	0	0	0	0
Control	mCTRL0449	ACAATTCGGTTTATGCGCGT	2989	785	12	88	4	41	23	10	67	15	98	124	15	203	3	4	30	7	19	6	10	8	1	1	7	3
Control	mCTRL0450	CGGGTTATAGATAGTCGTCG	1570	379	6	7	13	15	24	10	25	25	2141	14	10	3	4	968	8	81	5	3	162	0	1	6	4	0
Control	mCTRL0451	AGGGTTAGGCTGACCCGCGA	1582	416	3	4	13	32	0	2	10	4	1	15	3	4	0	0	3	1	10	0	3	0	0	0	2	0
Control	mCTRL0452	AGCTATCCCCACGTTCGCGG	3433	1051	26	424	65	92	12	43	49	143	71	244	888	160	7	14	1	162	5	21	81	1785	42	6	23	165
Control	mCTRL0453	ATCATGCCTTCGCATTAACC	3285	1268	75	2068	4	49	34	42	50	94	107	13	125	42	1	31	31	6	34	0	4	26	13	11	3	143
Control	mCTRL0454	TGGGTCCTAAACGCGGTTCA	2305	1532	15	731	586	74	80	280	89	190	120	34	1220	38	14	287	43	13	27	2304	21	79	16	131	15	33
Control	mCTRL0455	CATACTGTTATCGACCCGCA	3065	686	4	21	75	97	24	25	70	47	16	45	71	15	4	0	1	0	1	3	10	0	66	6	0	6
Control	mCTRL0456	TGAGCGCTTTCCCGATCCGG	3329	1024	4	241	12	5	81	4	9	4	411	4	79	106	7	2	6	9	2	0	1	6	0	3	3	3
Control	mCTRL0457	GCCTTCCTCGCAGACCCGAC	5010	1266	11	20	3253	36	116	64	107	48	360	23	216	450	534	8	23	8	37	16	8	175	47	7	65	8
Control	mCTRL0458	CCCTTAAAGTGACGGACGAA	855	373	3	0	0	6	66	3	23	2	313	11	38	4	0	0	0	216	1	0	0	2	1	2	1	55
Control	mCTRL0459	TGGTTCGACCAACATGGTTC	2703	1018	168	138	35	10	325	15	33	22	2	380	111	1	67	5	27	261	1	0	2	2	1	1	12	2
Control	mCTRL0460	TGGGCCATAGTGGCGCGTGA	2167	703	2	15	28	1	9	5	0	14	0	2	225	6	7	3	5	0	1	0	0	0	0	74	0	8
Control	mCTRL0461	TCATATTAGACAATCTCCGC	3242	1097	169	76	133	468	421	962	36	273	5623	27	142	88	4	6	22	8	18	18	0	30	33	15	11	17
Control	mCTRL0462	TAGCCGAGTTCACGCCAGTA	2562	980	80	115	69	28	259	52	27	36	330	45	41	11	31	23	42	44	8	21	14	27	158	8	8523	3302
Control	mCTRL0463	ACCAGGCGCGGACCGCACAT	3351	1137	148	66	63	24	20	28	2	10	726	12	53	83	7	6	9	225	1	34	26	2126	31	8	39	10
Control	mCTRL0464	GCGCGAGTGCCAAACGAGTG	1437	447	3	76	3	19	10	35	2	1	0	4	16	7	0	0	1	21	4	5	13	4	14	36	0	4
Control	mCTRL0465	AACGGCTGCGCCCGCGGCAA	1758	607	1	46	33	220	23	15	5	20	11	4	141	1	12	3	48	4	20	43	11	3	19	67	2	87
Control	mCTRL0466	ACGGTCGAGCACGGTTATGA	2135	870	85	28	335	561	2451	1016	24	27	31	604	14	4274	151	1520	121	9	189	1380	175	3252	43	3	33	2411
Control	mCTRL0467	TCATGTTGCGTCGTCCGTTA	4002	1160	61	20	87	786	157	21	284	122	40	2519	77	449	0	4	163	97	6	5	2	16	27	4	4	20
Control	mCTRL0468	CGCTCCGTATCCTCTCATAA	3540	1687	35	942	442	100	706	829	154	123	468	73	498	607	7	153	41	134	159	76	43	12	55	13	123	17
Control	mCTRL0469	AAACGAGGCTGTTCGTACAC	2246	625	8	40	0	87	20	4	856	9	3	6	1	31	24	2	0	155	7	1	0	30	7	2	4	0
Control	mCTRL0470	CACGTATACTTAGGTCAGCG	1755	540	5	311	4	0	1485	141	70	13	14	43	23	853	63	1	18	0	24	1	27	15	5	2	8	0
Control	mCTRL0471	ATCGAGCACCGAGTTGTGAT	2824	2142	452	1467	782	305	4293	108	2443	226	1374	222	3963	409	287	8537	410	47	236	50	685	3023	10239	110	64	33
Control	mCTRL0472	TCACTTTAAGCACCCCGCGC	4792	1238	1	153	29	111	40	20	549	15	83	257	14	45	0	4	6	10	8	1	0	2	4	6	28	1
Control	mCTRL0473	CTACTTGTGACGACCTCGCG	4551	1060	15	148	1239	84	1414	223	99	12	624	183	301	998	90	2	5	16	47	11	11	103	27	3	30	2
Control	mCTRL0474	CTACGGATAGGCGCGGGTGA	1644	521	3	45	1	11	19	7	14	14	7	0	26	15	2	0	0	4	0	14	5	1	11	3	1	23
Control	mCTRL0475	GCTTACCTACTCCGCCCCGC	6266	1849	947	1922	541	289	121	365	1006	149	78	326	189	337	22	11	91	26	27	2507	37	2481	106	86	101	27
Control	mCTRL0476	TAACACGCACTCACGTCCGG	3743	978	105	17	27	34	49	4	37	4	10	50	33	5	26	0	4	3	0	7	1	104	7	1	170	4
Control	mCTRL0477	ACTCACCTCGCACGATCGTA	2513	1161	32	781	185	20	135	311	187	151	120	183	188	187	24	15	22	343	20	10	4	208	262	23	1088	50
Control	mCTRL0478	ACACCCGTGTATGCACCGGG	2269	692	88	1657	1100	142	366	166	593	66	54	74	1003	845	2049	53	442	519	3085	29	123	360	444	260	89	141
Control	mCTRL0479	GCATAACGGCCGAGCACCAC	2475	836	5	54	57	5	9	28	234	87	367	2	41	5	3	1	5	5	1	111	2	88	7	2	28	11
Control	mCTRL0480	CCAGCGGACGGCGAACTCCA	1427	445	114	387	481	789	347	494	826	145	93	87	137	376	115	0	56	74	32	89	2	23	32	11	65	72
Control	mCTRL0481	TGACCCTCTTAATCTCCGGT	2748	1407	372	1370	270	1662	1501	6262	228	1218	1775	481	317	612	95	30	328	485	371	75	597	72	1428	227	1243	6618
Control	mCTRL0482	CCCTAAACCATAGTTTCGCC	2064	501	12	20	0	1	1	6	17	0	2	0	4	0	0	1	11	26	2	0	0	2	3	94	59	0
Control	mCTRL0483	CCCTAGCTCGGTTAGAGAAT	1260	271	12	1	2	17	14	1	6	0	5	12	22	1	1	1	2	3	3	8	0	1	60	2	1	0
Control	mCTRL0484	GAATTGAGCCGCAACTCGGC	1643	313	0	4	1	2	29	0	0	1	0	2	0	7	0	1	1	3	0	2	0	1	0	0	0	3
Control	mCTRL0485	TGCTTAGGGCCCTTCGGCGG	4427	1339	10	143	34	86	84	22	6280	16	725	23	755	43	17	0	23	4	5	13	4	4	6	314	15	60
Control	mCTRL0486	TCTCCGGGCCGTGTTAGACC	3108	1071	23	12	30	427	122	43	87	518	46	13	19	19	3	1	13	30	9	3	0	10	40	4	172	50
Control	mCTRL0487	ATCACACGTTAAACGGGGCG	1714	225	10	18	10	5	22	7	48	80	0	39	28	20	1	0	0	31	6	46	0	0	208	0	13	7
Control	mCTRL0488	GATCCCCTACGCTTCAACCT	4061	1686	568	1893	1807	3993	6479	907	3777	1405	3152	2209	1437	3261	4754	1356	904	944	1154	1538	907	3462	4826	1572	487	677
Control	mCTRL0489	TTATTTACGCGCTGAACTTG	2703	568	51	74	104	12	14	26	83	32	94	7	183	27	5	10	3	3	3	3	15	26	15	0	0	7
Control	mCTRL0490	ACCGTTGTTTCCGTCGAAAC	2270	413	37	0	11	10	10	14	2	90	9	1	5	3	62	2	12	619	1	22	4	1	3	129	0	31
Control	mCTRL0491	CGAGACGAATCCATCATGCG	1557	312	210	170	135	5	30	116	5	31	33	548	25	141	40	0	18	1	0	4	3	3	519	8	10	54
Control	mCTRL0492	ATATGCTCGACCCATCGTCC	2982	694	7	24	1	81	4	6	4	24	161	148	0	7	2	1	3	329	1	4	0	2	3	704	0	3
Control	mCTRL0493	AACCTCGTCTCATGTACGAA	1552	337	0	20	0	0	0	2	5	1	3	1	6	400	1	0	0	0	3	0	10	0	0	0	215	0
Control	mCTRL0494	AATTTTTTCGGAATCTAGCG	738	131	0	0	6	0	0	0	3	0	1	1	0	1	0	0	0	0	0	0	1	0	1	0	1	1
Control	mCTRL0495	AGCGAGTGTCCGTGACGTTC	3782	1193	848	11872	460	4860	1207	3049	675	1257	544	2523	6141	27374	4307	60015	9713	208	124	5504	472	5789	1697	193	296	1288
Control	mCTRL0496	AACGTCACCAACCTCGATCC	3293	1040	224	6	0	64	49	5	30	8	3	4	9	16	4	0	3	0	6	1	1	3	6	2	3	1
Control	mCTRL0497	GTCCTAGATCCTATCGGGAG	2064	795	290	3	54	56	2	0	18	0	10	1	27	55	3	0	4	3	1	423	2	6	6	0	4	11
Control	mCTRL0498	CATATACTCTTGCGCTAGAC	1881	240	13	120	2	3	110	20	1	6	0	23	0	2	0	0	28	1	6	1	0	4	5	7	0	0
Control	mCTRL0499	ACGTCGATGCTTATCCGTCT	3703	690	0	7	32	11	436	12	110	4	11	19	876	2	21	0	9	15	6	2	0	6	5	0	1	2
Control	mCTRL0500	CCGCGCATTAACGATCAGTA	2915	1164	140	46	125	24012	1490	44	142	9	29	342	31	104	6	10	150	44	11	39	16	5	52	13	204	185
Control	mCTRL0501	CCTATTAGTCCGGTTTAGTC	2873	678	2	24	6	2	196	4	27	4	70	1	103	391	6	0	6	2	14	0	2	3	5	8	33	2
Control	mCTRL0502	ACCTCGTGCAAATCGGTGGC	3113	708	1	2	32	9	181	371	46	67	4	8	6	10	1	0	1	0	4	0	0	3	6	2	186	6
Control	mCTRL0503	CACGCAGGAGCGGCGACACT	1848	974	46	17	15	20	418	43	38	45	17	49	1361	316	2	11	9	8	31	5	2	426	39	274	9	1
Control	mCTRL0504	GTCGGCCGCTTAACCCTTTC	4519	1210	14	10	303	81	7	20	91	19	45	54	499	5	2	7	10	15	22	1	12	17	7	9	35	6
Control	mCTRL0505	TGATCAACGTCGGTGGACGG	2680	1081	4	117	30	122	355	487	346	17	15	5	32	23	6	5	425	5	257	22	1	556	5	8	4	12
Control	mCTRL0506	GAACCACGAGCGAGCGTATA	1049	230	0	0	1	1	0	6	0	0	125	3	16	4	9	0	1	2	3	36	0	31	0	1	0	0
Control	mCTRL0507	GAACCCGGGAAACACGTCCG	1450	451	1	4	2	47	802	3	1	42	1	7	0	168	0	1	28	0	0	0	26	2	2	3	0	0
Control	mCTRL0508	GGAAACGTTACATTCGACGC	1560	284	1	22	317	4	145	0	9	6	600	108	2	14	0	0	3	0	0	3	2	1	1	6	0	0
Control	mCTRL0509	AATAGGAACTCCGCACCCGA	1634	559	3	1	18	19	135	41	2	3	49	11	7	2	7	86	1	0	5	1	14	14	5	17	129	10
Control	mCTRL0510	GTAGTGCGTGTGATGTCGGG	2642	727	14	0	12	565	295	6	1	19	1	4	3	17	27	0	1	2	2	0	53	0	0	4	16	12
Control	mCTRL0511	TTTGACATTTTCGTCTCGCG	3967	1911	1453	115	151	533	661	166	69	38	158	142	253	126	81	16	58	502	5	93	35	27	196	12	17	96
Control	mCTRL0512	AGGTCCGCTGGCGCAATGGG	2314	1040	606	11292	6413	5976	10882	1597	2539	2747	14246	1663	4597	4612	1859	36638	13483	9869	2568	8525	1644	16826	1730	986	5788	19540
Control	mCTRL0513	CCGCCCGGGTGTGAGTTGAG	2224	860	6	18	9	10	245	64	0	64	55	11	28	39	8	251	0	0	4	74	2	6	3	3	0	5
Control	mCTRL0514	GCCGAGAGGCGTAAGCGCGA	1754	477	3	49	161	4	3	1	7	7	26	19	15	3	24	0	0	0	3	0	32	0	0	3	0	1
Control	mCTRL0515	TAATTCGCAACTCGGATCAT	2992	738	20	29	246	18	234	136	30	17	117	57	42	51	21	13	59	56	2	7	5	4	32	12	13	15
Control	mCTRL0516	TAAGACTGGGTGTCCCGCGT	2489	602	13	222	14	79	101	0	50	13	242	5	27	46	23	2	89	18	0	1	28	17	16	1	19	36
Control	mCTRL0517	TTACGCAAAGCTGCGATGAG	1992	425	1	24	0	76	0	3	24	0	8	12	4	6	25	8	1	0	0	0	2	3	0	2	2	0
Control	mCTRL0518	GGACACTCGCCGACCCCACT	2580	772	24	217	967	77	168	168	124	690	761	146	498	90	148	18652	71	343	236	11	200	372	33	150	24	15
Control	mCTRL0519	TACGTCTGCGCAAATAGAAT	1522	525	3	0	17	2	37	4	1	2	3	5	11	0	14	0	0	1	7	1	37	21	8	0	2	1
Control	mCTRL0520	ATACGCGTGATGACCTTATG	3748	794	8	29	107	46	10	8	100	0	35	27	13	13	2	4	2	0	0	1	1	0	9	42	13	3
Control	mCTRL0521	CGCGCGACTGCAGCTAATCT	3275	1080	45	108	11254	1175	75	168	372	155	92	463	71	33	10	11	131	51	106	286	15	26	22	452	10	3512
Control	mCTRL0522	ACTTCCCGCGGTTCCGTTGA	4415	1136	27	768	701	192	237	119	937	14	169	235	1899	37	2	6	17	7	5	27	23	19	62	23	6	152
Control	mCTRL0523	TTATGACCTCGATGCGACAT	3049	831	149	170	61	71	74	30	30	5	9	14	6	4	0	4	36	37	96	5	1	377	4	1	6	3
Control	mCTRL0524	TGACGCGCCTCGGACCAACC	3896	916	1282	415	1635	482	1092	190	5032	348	78	215	403	1364	1679	39	31	322	2174	225	25	168	39	101	562	58
Control	mCTRL0525	TATCCCGATCCGGAAACTAG	1433	418	1	0	0	13	0	1	15	0	0	24	0	11	0	2	0	0	0	0	2	0	0	2	0	3
Control	mCTRL0526	AGTACACTACATCGACTTCG	1630	588	20	30	3	440	22	31	50	5	250	20	199	3	10	2	0	5	5	0	1	2	0	1	1	6
Control	mCTRL0527	TTCCAGTATACCGAATTCGC	3538	1030	83	4094	1865	184	3654	30	138	297	31	133	4590	266	81	12761	58	2008	1948	5217	29	2486	413	335	1164	211
Control	mCTRL0528	CCCGGCAGACTAACTAGCGC	1194	530	0	0	1	0	0	6	0	6	5	0	1	2	0	0	0	0	0	0	0	0	0	0	1	0
Control	mCTRL0529	GCAACGGACAGTCATCGAAC	1337	369	10	0	0	6	2	5	0	3	92	7	19	5	0	0	0	0	4	2	1	2	9	2	0	2
Control	mCTRL0530	GCTAGCGTTCAGCCCGATGT	2221	1105	32	3	62	24	410	306	1434	464	218	52	10	0	5	0	2	0	7	5	3	76	8	0	0	1
Control	mCTRL0531	TATGAACTAGGCGTAAACGG	1091	336	10	3	3	16	3	14	20	4	65	2	64	0	181	7	0	29	3	2	0	2	10	0	2	4
Control	mCTRL0532	CGCGCGGATATTTAAACTTC	1306	373	18	6	18	6	69	15	149	3	306	10	20	17	92	2	0	0	15	6	0	73	888	15	2	0
Control	mCTRL0533	AAGCAGCGACTACTCGACGC	2080	714	73	39	73	12	6	14	40	10	31	13	91	15	3	0	2	28	211	0	1	11	22	21	3	9
Control	mCTRL0534	CCCCTATAGGCGCGCTAAGG	1259	762	3	57	0	1	8	59	4	13	34	16	44	58	0	0	2	0	1	4	1	3	5	2	4	0
Control	mCTRL0535	CCGAGATGGCTCGGATAGAC	2268	737	14	17	122	38	243	76	132	221	80	17	31	256	0	0	106	5	17	4	24	29	17	20	8	5
Control	mCTRL0536	AGCACGCGCACAAGAGCCGC	2220	935	83	29	1852	58	1241	1150	1608	243	4592	163	17	126	39	10	26	105	6	4	223	6	19	76	0	31
Control	mCTRL0537	TCGTAAAGTCGCAGCGACGT	1686	631	27	165	183	70	16	32	12	144	8	6	345	963	0	4	6	8	1	14	0	2	119	0	226	18
Control	mCTRL0538	GTCTAACATCGGCGCACGTG	3605	802	19	20	165	19	79	7	14	36	15	10	6	835	614	10	13	0	3	3	8	36	2	1	20	28
Control	mCTRL0539	TTCAACGACGGAAGACGCGC	2426	675	10	66	2	47	8	35	127	12	59	6	83	39	11	0	0	0	34	4	7	6	19	1	1	35
Control	mCTRL0540	CGCTCGGTAAGGTCGATTGG	3794	2127	85	922	174	1105	1053	104	599	91	838	68	1454	428	1289	21	15	742	52	19	120	82	211	107	219	8
Control	mCTRL0541	TAGGGGTGCGCATTAGACTA	1676	1010	4	6	81	25	43	138	507	253	9	13	5	6	0	2	24	3	4	3	5	3	7	2	7	0
Control	mCTRL0542	GCCCGACCTCCACGTAAATC	2517	1272	19	23	104	162	105	1077	62	48	18	44	23	23	14	3	6	20	2	11	13	123	21	7	2	4
Control	mCTRL0543	TATGAAACATCTCGGCGACG	1551	160	1	3	1	24	411	7	27	1	11	5	0	2	0	0	0	0	0	5	1	0	1	0	0	16
Control	mCTRL0544	CTGCTTGAACGCCTAGACGG	2826	722	39	39	35	62	144	15	23	9	233	81	9	148	45	5	50	301	17	76	1	41	14	3	1	15
Control	mCTRL0545	GGGCCGGCACTCTGTCGGAC	2022	730	2	24	20	5	34	56	75	885	21	5	16	29	56	11	25	0	4	3	5	37	5	83	7	0
Control	mCTRL0546	GCCGACCAACGATGACCACG	2191	728	26	7	74	36	528	42	46	2	10	21	12	1110	6	2	5	3	1	2	0	12	23	1	2	8
Control	mCTRL0547	ATCGCGGCGCGTTAAGGCAG	3133	1008	241	766	1002	1010	433	235	1238	53	52	575	226	598	450	76	38	55	15	18	181	612	283	891	380	64
Control	mCTRL0548	CGACGGTTGTGCTGAGGCTT	4856	992	16	38	17	1406	208	73	83	14	337	6099	15	31	25	1	4	381	11	4106	46	104	711	9	16	67
Control	mCTRL0549	CGGATCCTCCCGTACTATCC	6957	1528	12	4	36	58	375	6	71	27	8	506	119	30	26	7	202	200	10	0	126	32	44	12	2	10
Control	mCTRL0550	CCATTAGTACGAACATTGCG	2507	1297	6	2	10	298	33	191	370	21	98	11	36	89	48	4	154	2	18	17	13	35	1235	6	2	7
Control	mCTRL0551	GCTCATACTGATGAACGTCC	3131	408	1	19	1	36	7	45	28	0	5	1	107	11	0	1	5	0	14	0	7	7	2	1	0	0
Control	mCTRL0552	GCCGAATCGCGTTATTCCAA	3476	834	24	144	376	68	77	63	27	57	442	11	97	14	51	0	4	63	1	7	13	2	208	25	0	8
Control	mCTRL0553	CAAGGATCGTGCCGTGATTT	5369	1243	14	378	151	100	112	970	10	37	161	36	62	103	6937	68	19	74	438	881	18	762	5	2	26	53
Control	mCTRL0554	GTTAATATTGTGGCCCGCAC	3952	675	1	1	9	124	6	170	18	9	24	1	30	7	0	0	3	6	4	1	91	4	14	5	0	1
Control	mCTRL0555	CCAACCCGGCATCGTCCGCT	5410	2072	40	139	4126	201	1116	47	598	826	122	7002	161	100	7	35	14	122	90	6	18	22	68	11	22	84
Control	mCTRL0556	GCGAGCGCTATCCCGGTGGA	3172	692	423	960	7056	604	43320	125	16591	366	68	166	474	364	74	137	73	8436	208	201	312	1215	772	28	9602	45
Control	mCTRL0557	GTGTATGACGAGAAGCGAAG	1095	180	0	0	1	0	0	0	0	0	0	104	0	13	0	0	11	0	0	0	0	0	0	21	3	0
Control	mCTRL0558	GGTGTGGACCGCTTTTACGC	8063	1204	43	118	2	47	156	5	76	11	9	2216	21	50	3	16	0	2	4	28	16	9	15	5	22	1
Control	mCTRL0559	GTTATACCACCTACTATGAC	4305	690	2	8	0	4	49	26	6	103	4	18	3	22	0	0	1	2	18	1	9	4	11	5	3	156
Control	mCTRL0560	GATACGTGAGGTTGCCGGTG	1719	389	11	17	16	37	7	0	19	3	53	4	4	150	2	1	4	5	0	0	41	0	0	1	200	0
Control	mCTRL0561	TATGCCATATGCCCGTTTTT	7882	1921	526	79	27	1287	180	19	31	210	18	13	90	20	42	9	10	488	6	5	21	12	26	8	63	6
Control	mCTRL0562	TCATCTACGGTATCGAAAGG	2766	753	1	33	5	6	83	15	18	2	1	8	4	12	3	0	4	0	0	1	1	0	1	0	0	0
Control	mCTRL0563	AGTGTCACGGCAAAGTCGAG	1957	342	1	13	3	6	10	2	8	1	5	15	34	0	0	1	10	3	0	0	16	3	74	0	0	2
Control	mCTRL0564	CAATGGCGTCTGCCGTTCAG	3192	840	3	710	19	2	177	12	30	109	550	11	18	19	0	0	4	0	1	3	0	29	16	4	0	4
Control	mCTRL0565	GCTCGCTGATGTGTAATCCG	3518	750	14	123	33	193	29	7	4	1	5	26	60	14	204	4	18	3128	207	116	5	6	4	7	0	1
Control	mCTRL0566	GGATACATCGGCGCGCTAGT	2436	534	6	32	245	35	12	2	14	1	54	184	22	29	6	0	6	40	2	4	5	20	562	3	4	37
Control	mCTRL0567	CAGCACCACGCGTCGTGCGG	3683	1087	18	83	164	101	57	119	244	49	14	31	17	18	1	1	2	85	85	1	2	142	90	3	30	17
Control	mCTRL0568	CGATGTCGAAAGTCGGTCAA	3153	706	8	40	43	310	4	156	96	9	98	30	5	263	1025	9	11	0	0	3	0	3	2	21	330	17
Control	mCTRL0569	CGATACGCTATAGAATAGTC	1899	330	1	2	0	18	0	0	23	25	0	1	0	0	0	0	0	0	0	0	2	0	3	0	8	0
Control	mCTRL0570	GCGTGGAGTTCGTCGCTCTT	3518	836	41	50	48	23	55	12	64	2	213	28	66	69	30	14	4	1	3	8	48	2	6	3	6	12
Control	mCTRL0571	CACAACGCCTACCAGCGGAC	3176	924	31	5	53	122	18	377	96	3	6	14	19	6513	2	0	1	7	3	12	0	2	3	20	4	9
Control	mCTRL0572	ATTTGCCCGTCCATACGCGG	6672	858	2440	107	82	23	82	110	25	593	55	153	847	4282	392	2	16	157	8	1	97	33	74	3	13	82
Control	mCTRL0573	CGGTAAGATGGTTATACCGT	3111	711	0	27	2	8	218	15	12	13	9	3	5	2	5	1	2	55	0	2	0	2	1	0	2	1
Control	mCTRL0574	GTTCGCGGGGGCTTCTATCA	2825	651	1149	193	291	6745	692	54	1359	284	24	24	197	323	292	662	749	20	68	67	57	615	23	41	3	23
Control	mCTRL0575	GGCACCGCGTTTATTGCACT	5897	1136	2652	4643	1476	20357	40551	1220	2714	4655	1162	133	21730	181	1159	1134	1815	1763	1862	762	837	207	453	373	28	15884
Control	mCTRL0576	TGACAACCGCGGTACCTCTA	3443	746	6	31	85	177	29	79	9	19	32	16	70	1500	1	0	189	55	3	72	5	1	1	1	0	737
Control	mCTRL0577	GGTCGCTCGATTTCATTTAA	1497	890	27	172	381	4	48	27	50	20	79	141	4	258	487	33	32	5	3	181	5	147	2	14	11	445
Control	mCTRL0578	GACGAAAGGTCCTACGAAGT	1276	183	1	0	2	11	0	0	10	59	0	0	0	1	1	0	1	48	133	0	0	0	2	25	1	0
Control	mCTRL0579	GTACCACTTATCGACCTTGC	5220	708	12	5	0	16	86	5	45	2	27	11	14	3	51	0	0	0	3	8	1	14	0	4	21	1
Control	mCTRL0580	TTCAAGTGTTATGGACGCGC	3316	619	273	4	9	4	7	15	17	170	111	61	7	13	1	0	7	0	130	17	1	16	0	3	12	10
Control	mCTRL0581	TGAGAGCAAGGCGCATACGC	2930	878	86	187	49	972	107	32	217	238	177	1190	66	516	3023	55	595	56	63	69	50	22	152	32	55	45
Control	mCTRL0582	CATTCTCTGACGAATGCGCC	1244	305	1	0	0	5	6	0	8	0	8	21	7	30	10	0	2	3	0	1	1	1	29	0	1	0
Control	mCTRL0583	ATCCCCCCGACTTAGGGATT	2702	731	9	15	0	28	294	13	13	179	42	7	20	10	1	0	0	0	7	3	0	1	2	9	0	2
Control	mCTRL0584	CAGTGCCGGTAGCGGCACGG	2030	841	6	62	103	37	201	101	49	18	30	14	464	83	1	2	3	4	3	5	7	7	6	5	198	1
Control	mCTRL0585	ACGACGTCCGCTGTGTGTAT	7396	2150	9	64	873	1194	61	109	127	220	861	290	90	130	31	14	10	135	6	120	6	17	1931	15	512	4
Control	mCTRL0586	GCGCTCGAACAAACATGGTC	1519	235	0	0	0	0	0	0	0	0	2	0	4	0	0	0	0	1	0	0	0	0	1	0	0	9
Control	mCTRL0587	GGCAACGCACGCTGGGTTGT	3291	738	28	37	10	188	353	59	1071	8	364	10	36	91	5	0	0	2	0	5	2	5	4	107	1	2
Control	mCTRL0588	GCTATTCCGCTCGTCAATTT	3365	715	46	519	93	54	35	15	56	27	5502	406	24	40	8	25	301	8190	28	93	10	17	17	1	185	9
Control	mCTRL0589	TTCATCGCAGATCGATTTCG	3941	1087	4	10	8	2	1	5	23	8	1069	9	12	2	1	5	3	0	1	14	28	5	0	2	0	4
Control	mCTRL0590	TTCATCCTTCGTAGCGCAGC	3472	486	1	9	25	12	0	1	9	3	5	4	6	5	0	0	4	2	0	0	0	9	1	1	0	3
Control	mCTRL0591	TGGTTCACCACTCGAGATCG	4182	1124	43	982	40	101	97	3	150	39	1098	3	111	36	0	8	9	31	16	203	1	40	20	3	20	31
Control	mCTRL0592	TTGAGCGGACCCCCCTACAA	2238	465	14	487	847	64	0	101	24	1	314	120	69	2	63	3	21	3245	9	365	15325	283	27367	1	6	21
Control	mCTRL0593	ATGTGTATGAAGCCCGTCAT	4387	860	1	117	17	11	154	12	179	50	10	31	566	107	2	0	2	0	1	0	5	2	8	3	21	0
Control	mCTRL0594	TAGGTGGCGCCCAATCGGAC	3166	713	45	15	19	1	35	52	65	26	10	264	10	1735	9	0	56	21	2	4	3	9	1	33	115	15
Control	mCTRL0595	CTCGTGTCACTCCTCGGTTC	13131	2484	82	198	66	311	259	501	106	172	677	277	154	53	6	47	34	2	16	331	48	52	152	134	379	22
Control	mCTRL0596	ATGCCAATGCCGTTGTTAGC	4061	782	56	14	410	85	30	12	8	12	185	65	7	0	60	10	5	1	3	349	3	55	130	21	2	141
Control	mCTRL0597	CCTTACGGCGGAGAACGAGT	87	34	0	0	0	29	6	0	0	0	0	0	0	1	0	0	0	0	0	0	0	0	0	0	0	0
Control	mCTRL0598	CGCGCGGATCTTCCGTACAA	2700	596	189	3439	1372	10147	4342	1365	1524	11281	476	596	13954	1503	12	21	5	19	2325	403	308	477	337	15	4395	18
Control	mCTRL0599	CGGCAAGCGCATTCCTATGG	3707	837	1	26	7	8	5	18	17	7	17	118	21	9	2	1	0	0	4	2	1	3	9	2	1	8
Control	mCTRL0600	TATGATCGTATGGCCCTTCC	7501	2250	16	154	650	74	80	81	153	1202	124	35	1751	61	28	8	4	20	6	8	26	45	64	108	5	14
Control	mCTRL0601	ATCGCCTAGCCCAAGCGACG	2249	221	3	8	91	37	51	2	2	4	47	3	4	81	0	0	0	0	0	1	0	0	0	0	1	1
Control	mCTRL0602	GCGATCGCCGGTATAGCTTT	359	37	0	4	0	0	7	0	0	3	0	0	0	0	0	0	0	0	0	0	0	0	0	0	0	0
Control	mCTRL0603	CCGTTCAATTATGCTGGCGT	3132	1247	21	493	71	45	28	56	12	56	7	16	17	19	0	4	5	2	12	10	1	18	24	2	117	5
Control	mCTRL0604	CCAGCTAACGTTTTAGTACG	4583	1266	4	1	72	89	75	4	315	24	35	980	5	19	9	4	2	2	3	9	75	82	54	7	29	6
Control	mCTRL0605	TCCCCTTCGTCGGCGCCAGG	6935	1783	29	186	22	279	209	36	504	9	56	48	63	146	12	506	305	7	6	20	10	8	982	16	1	17
Control	mCTRL0606	TTCTGATTAGATACGTACGA	3469	966	388	98	34	22	25	2189	49	7	22	27	24	90	11	4	167	155	919	49	38	75	6	312	28	164
Control	mCTRL0607	TTTTCGTCGACTAAGTCAAG	2697	481	3	14	12	499	13	6	130	4	1	4	10	7	4	0	1	31	0	14	0	8	3	2	4	1
Control	mCTRL0608	TCAATTAGTGGCCGCCAAGC	5888	1360	9802	19694	990	482	257	509	408	63	151	20873	1335	66	475	306	11232	513	52332	14927	1236	12197	88	1290	98850	149
Control	mCTRL0609	TCAGCTACGATCGGACCCAA	2892	830	37	53	1673	195	392	1898	98	744	762	67	104	357	3219	98	306	106	5	11	173	4	385	78	57	97
Control	mCTRL0610	GCACGAACCCGTTCGTATGG	2836	801	27	5	13	323	5	17	46	497	23	20	29	18	1380	23	109	17	889	33	7823	3293	28	6	398	7
Control	mCTRL0611	CAATATGCACGTAGCCTCGT	4431	2146	46	945	28	60	69	23	226	32	26	465	996	1191	39	92	4	13	1223	112	2571	952	355	9	3354	205
Control	mCTRL0612	GACCGACGGTATACCCTACT	4180	1068	32	66	71	18	34	82	5	137	16	52	788	188	61	368	2	4	1	20	0	6	2	5	0	0
Control	mCTRL0613	TTGAAGTAGGGTCGGATTGA	3016	775	5	118	413	26	13	15	157	9	31	8	14	17	16	6	70	10	528	26	3	31	38	1	2	1
Control	mCTRL0614	AAGGCGTAAACGAGTACACG	1663	525	40	1	1	12	1	34	4	15	7	0	68	98	2	0	2	493	0	2	17	8	75	0	5	139
Control	mCTRL0615	AATGAGCTTCGAGTTCGTCT	2108	233	2	0	36	1	0	0	22	0	0	427	0	22	0	1	309	0	50	0	0	4	0	1	0	0
Control	mCTRL0616	ACGTGTTCTCGTACTTAGCT	2609	517	1	28	5	6	528	15	87	9	11	21	75	273	14	1712	24	11	218	8	161	2580	4	28	24	2531
Control	mCTRL0617	TTAGCCTTGCCCCGTCATAC	8592	2344	6138	11020	136	4048	41	114	359	267	814	14121	1448	3779	12878	107	163	185	288	860	70	7145	288	108	69	42014
Control	mCTRL0618	GCCTTTTCCGCCCGTTCAAG	3351	1950	3646	21202	10649	10244	25492	39442	21246	4107	5072	18331	4815	6111	1115	527	1561	1442	3124	1361	3177	1910	1457	5639	4407	7096
Control	mCTRL0619	CAGAAACTCTTACCGAGCGC	2504	329	9	852	61	949	11	6	30	26	725	3	290	0	20	1	159	7	1	0	0	8	31	0	1	0
Control	mCTRL0620	CTTGAAAAAGGGGCGACTAT	1725	245	0	4	0	0	16	0	0	3	0	12	0	3	0	0	2	4	2	0	0	0	0	1	0	1
Control	mCTRL0621	CCTACTAACGACGAGTCAAA	2097	416	7	38	48	49	6	16	5	169	7	33	57	95	64	420	1	27	1	18	6	1	1	1	3	823
Control	mCTRL0622	CATTTCCGGGGTCCGATGCA	5589	1048	95	39	9756	109	3985	135	438	283	144	7	42	49	4	0	4	51	4	109	3	14	168	3	5	7
Control	mCTRL0623	CCGGGCGCCGTATCCCCTAC	5050	1078	56	377	211	49	23	57	27	30	2078	292	1293	129	588	39	53	3835	69	2	44	735	23	5	18	1295
Control	mCTRL0624	GAGACCCATTATGATCCTAG	1462	249	1	3	5	1	0	7	4	0	0	4	454	387	11	0	0	189	3	3	8	1	0	0	21	5
Control	mCTRL0625	CGAACTTCTACCGTTGTGCG	3256	767	14	505	11	6	191	18	1382	773	55	2	16	85	10	2	13	1	30	14	5	6	26	1	66	9991
Control	mCTRL0626	TGGCTTAATGGACAGCGCGA	2206	738	10	328	18	257	113	4	53	2	8	74	64	10	2	2	1	0	16	50	31	46	16	12	34	4
Control	mCTRL0627	CCGGCGCTGCGGTCGGCTTG	3006	1003	771	687	2102	1058	4388	1071	1402	2063	3927	278	1779	1086	902	514	9183	7183	4094	2090	2059	1250	6293	2680	13699	577
Control	mCTRL0628	GTTACTTACCTGACCGGCAA	2647	629	1	12	5	46	2	13	3	5	49	17	34	466	1	57	6	86	4	34	4	16	14	3	5	4
Control	mCTRL0629	CGTTATTGTACACCACGCTC	4630	1027	42	95	1576	969	2713	172	87	550	571	331	55	1061	23	17	553	41	17	285	21	39	550	15	331	41
Control	mCTRL0630	CGAGCTCGGCAAATTTGATT	3048	738	45	12	1	97	7	2	13	16	16	181	0	40	47	4	4	0	69	16	7	0	14	0	15	8
Control	mCTRL0631	TGGTACCACTCGCCGAATCT	5624	1336	37	95	60	1218	96	79	173	593	168	286	35	1290	19	8	106	26	25	9	7	30	86	19	5	22
Control	mCTRL0632	CGTGTTTTACCTCGCTTCGA	5162	1262	71	108	204	105	79	189	29	24	85	9	316	50	2	2	26	26	8	598	79	24	798	107	10	60
Control	mCTRL0633	CGTCCTCGCAGCGTAGACTG	4489	1479	74	91	56	339	3022	296	175	423	605	681	565	177	18	3	919	25	4	122	36	39	458	10	76	34
Control	mCTRL0634	GTACGCAGGGTGTAGCGACC	2507	599	356	184	43	34	175	76	5	14	2	8	7	5	2	0	9	0	1	3	0	0	4	1	4	4
Control	mCTRL0635	CCTTTGATGGGCGCGTACTC	3739	781	21	17	104	1072	2328	65	71	88	1192	85	3968	316	45	3	9	426	8	651	764	202	103	46	12	13
Control	mCTRL0636	CCCTCGGTTGAGCAGCGCGA	4499	1526	1180	4435	1531	3908	241	3685	1669	181	126	1915	1524	1820	45	27	87	346	372	46	409	1225	253	60	82	150
Control	mCTRL0637	AAGCGTGAGATTCACCGCCG	1758	207	7	1	146	0	45	0	11	1	0	2	0	0	6	3	0	1	0	0	1	5	0	0	5	1
Control	mCTRL0638	GCGGGACCCCCGGTATAGTC	1026	231	1	0	0	3	834	4	5	142	0	0	0	0	23	0	0	0	0	1	2	0	12	0	0	4
Control	mCTRL0639	GACAGCCGGTTGACCGGGTC	1981	279	1	11	4	2	6	5	17	10	10	22	20	51	10	0	0	3	0	1	0	11	11	0	0	0
Control	mCTRL0640	GGAAACTCTTGCTCGACACG	1379	234	87	569	1506	6	554	38	42	5	21	183	365	726	83	3	12	2	46	90	33	84	112	58	3	458
Control	mCTRL0641	TTGAACACGACACCCGTGCC	5631	1184	197	33	1011	38	39	42	124	48	203	39	2338	23	3	22	4	11	9	2	90	94	1	3	7	22
Control	mCTRL0642	GTCGCTCGAACTCACGTAGC	3721	935	226	30	20	34	44	48	13	2	12	9	124	2032	4	3	8	20	17	82	7	4	13	156	14	10
Control	mCTRL0643	GGGCGCGTCATAGACACACG	1605	1585	1165	4879	2501	10536	14582	1471	1664	24706	666	521	216	3888	1204	144	2148	307	198	383	44	664	622	58	1673	1127
Control	mCTRL0644	CGTCGAAGATACGCAGGCTG	2539	508	5	132	88	5	15	5	152	0	26	4	39	21	12	2	3	0	2	1	0	3	0	1	3	36
Control	mCTRL0645	TAATGGCACTTACCGGGTCT	3958	1082	322	565	1661	2442	1124	395	638	1474	1260	13572	1233	248	42	34	274	102	65	5236	189	618	216	6791	1608	74
Control	mCTRL0646	CTAACAGCGCCGTTATCTAC	4495	775	342	22	268	120	358	79	65	682	61	152	52	132	4	2	43	24	5	16	7	375	35	16	40	115
Control	mCTRL0647	TTAGTTCGACCACTCCTGAT	4816	1471	33	556	199	181	79	67	169	53	138	288	122	18	25	24	38	22	25	93	3	716	338	115	108	792
Control	mCTRL0648	AATGCTGCGTACGATAACCG	3292	285	0	6	2	0	4	1	37	3	2499	1	71	1	2	0	10	1	1	0	0	3	2	0	0	124
Control	mCTRL0649	TATGACACACAATCTGCGAC	2840	485	54	196	21	131	241	34	49	59	58	107	109	313	127	56	19	9	35	233	18	232	55	45	1	212
Control	mCTRL0650	TTGGCGGCTCGCTCCTGCGT	9938	2320	3929	12819	1817	9759	11548	6596	6905	10077	15913	18146	17878	27211	7361	15304	6086	4826	1130	4146	264	43471	9500	25041	5840	13919
Control	mCTRL0651	AGTCAGCTCCGGGGTATACG	2413	527	8	13	0	95	15	2	2	7	81	25	187	4	7	1	1	1	1	31	21	32	7	1	1	2
Control	mCTRL0652	GCGAGTTATTTCGCTATAGG	2186	473	2	0	7	0	1	58	4	1	95	2	6	0	0	0	4	33	0	0	0	0	3	0	113	0
Control	mCTRL0653	ACGTTGCAGCTCGCGTTTCG	4143	858	65	63	90	148	103	54	87	54	382	96	6	122	13	4	21	2073	6	3	4	19	44	3	19	6
Control	mCTRL0654	CATCGGTAGTCACTACGCCC	6077	1792	51	90	157	127	78	64	34	155	104	552	65	18	4	71	114	3	9	1592	5	62	50	18	20	32
Control	mCTRL0655	GACCACTATGTACTTATCGC	4792	1081	74	847	31	92	36	93	342	94	81	1593	75	15752	5	2	85	2018	7	11	399	11	23	17	9	81
Control	mCTRL0656	ACCGCGCATCATTGACGGTG	3400	695	30	6	15	31	125	30	1001	34	1	9	12	61	2	17	4074	15	0	1	18	5	5	0	6	440
Control	mCTRL0657	CAAACGAGGCCACGTACGTG	2339	509	129	128	49	12	30	88	90	13	4	2	2	38	25	299	14	0	148	3	0	0	2	0	2	0
Control	mCTRL0658	TCACTCAAAGTGCGTAGTCG	4152	951	17	24	35	102	91	3	28	35	444	15	56	60	67	37	6	16	8	3	8	8	5	1	34	1
Control	mCTRL0659	GTGTCTTTCGGTCTTACGAG	2901	699	6	10	2	12	37	11	251	6	10	10	229	5	6	0	5	5	26	5	1	1	1	4	1	15
Control	mCTRL0660	CCGTGATTTCGGTAGCGTAC	3745	1197	245	47	15	51	70	41	18	3	437	381	68	110	35	8	21	1	8	992	601	14	28	12	2573	27
Control	mCTRL0661	CTTTGGCGTCGAGAAGCGCA	2802	907	14	2	23	110	45	13	62	241	106	46	125	18	43	3	7	5	4	0	2	16	14	3	1	0
Control	mCTRL0662	AGATAGCGCAATCCCGCATG	2564	253	5	17	0	74	52	28	15	11	37	25	4	1	320	0	3	5	1	12	6	49	433	2	0	0
Control	mCTRL0663	CATCAGCCCATTATGACTCG	3832	1030	1	103	3	9	0	1	10	5	128	12	2	41	0	0	15	2	3	0	1	1	1	0	26	2
Control	mCTRL0664	CCGGAGCGCGTTGCAGTTCT	4319	1421	1000	48	22	89	65	115	553	49	183	1020	295	269	25	8	17	237	5	39	57	39	23	16	24	3858
Control	mCTRL0665	TTTTAGTAGGTCAACGCTGT	3036	779	1	14	52	53	103	33	21	15	66	12	55	9	1	219	1	5	6	2	1	28	0	4	3	12
Control	mCTRL0666	CTAATTCCAATATCCGTCTG	5753	1253	159	720	28	134	203	142	120	48	127	130	23	107	266	8	21	11	21	14	16	79	20	20	28	2981
Control	mCTRL0667	AGTTAAGCGCGTATCTACGT	2991	852	2	10	6	1	4	8	5	4	10	5	2	59	0	0	1	0	8	6	8	5	0	0	12	2
Control	mCTRL0668	AGTCCGGTCGAAATCTGTAT	3792	1067	102	87	37	919	93	21	61	80	61	13	72	210	161	3	6	12	2	4	0	7	84	103	48	1
Control	mCTRL0669	ACGCACCCATACAGGCGCTT	2848	733	65	6	6	131	4	2	19	25	36	5	9	71	0	0	2	3	0	1	193	3	1	2	1	1
Control	mCTRL0670	AGGCCCCGAGACGCGCCACA	3365	813	8	56	54	48	385	618	102	5	8	907	108	25	1074	5	56	254	543	853	219	3622	14	4	1	7
Control	mCTRL0671	TGACCCGTCTCTTCGCGCAC	7301	1662	33	100	207	437	97	309	277	335	153	40	24	219	18	63	82	255	50	34	159	36	148	19	3	10
Control	mCTRL0672	TCCTCCGATCGACCAGGGTA	4513	1834	194	56	103	123	210	161	110	229	932	64	249	336	84	251	38	216	1647	280	291	364	542	205	165	34
Control	mCTRL0673	CGTTAATCCACCGTATGGGC	3054	532	9	7	33	4	66	1	85	3	20	2	5	7	4	0	5	112	0	0	11	8	2	0	1	1
Control	mCTRL0674	ATTAGGTGACTGGAACACGT	2762	473	29	256	218	148	62	87	37	1353	1390	42	417	98	5975	190	34	84	21	1	48	168	1430	3	1	12
Control	mCTRL0675	TCTTCTCGAGCGTGCGGGCC	6782	1670	196	194	22	2956	396	93	115	9	544	334	3921	2057	2704	47	29	7	87	212	72	116	15	1	2	18
Control	mCTRL0676	CGTGTGTTTACAGCCCTTAC	5581	1219	54	48	25	26	450	8	938	25	303	4	29	7	0	6	522	0	0	2	7	4	29	5	448	4
Control	mCTRL0677	CTACCGGTCACGTTGTGACC	2814	508	4	6	0	10	5	8	30	10	0	8	37	2	21	2	1	6	44	14	0	0	0	0	6	3
Control	mCTRL0678	TGCTGGCCGATACGTGCTTG	9472	3431	783	3805	1443	6500	8901	931	3299	2203	1696	2352	1193	5265	7831	2256	1185	1701	1681	3234	705	5696	7064	3347	707	1012
Control	mCTRL0679	ATACCTCCGCTACACCGTCT	8916	1778	123	93	367	165	106	290	497	98	3625	464	2751	94	23	23	32	18	152	88	44	3960	40	9	49	31
Control	mCTRL0680	CTCGTCGGCTTTCGTGCTGC	10225	1862	109	316	371	66	101	77	137	23	95	65	75	84	12	9	165	68	16	12	202	379	41	217	29	28
Control	mCTRL0681	GTAGGCCGCTGATCGAATAA	2029	684	49	33	143	21	12	2	588	3	106	223	88	14	0	2	8	23	1	1	40	0	7	2	3	0
Control	mCTRL0682	TTTCTAGGGCCGCCGCCCGC	10033	1999	201	815	470	587	4701	2863	197	331	2683	577	159	2897	3827	481	12115	19584	2771	1178	68	56	1122	201	814	1156
Control	mCTRL0683	CACGGCAGGCATCTCGTCTA	4396	1192	101	1071	568	453	3417	1494	301	262	127	50	650	166	88	7	268	121	913	30	296	39	3587	819	191	55
Control	mCTRL0684	GAGCGCCAAGCGTGCGTTGA	3031	930	10	35	13	8	77	33	16	0	43	63	5	15	3	13	2	9	4	5	4	5	20	5	6	20
Control	mCTRL0685	CTCGATGCCACGGAAGGCGG	1811	701	7	6	6	8	21	294	0	5	2	2	0	11	0	0	0	5	0	2	2	2	0	2	1095	7
Control	mCTRL0686	CACGCCTTCGTCAACCCTAT	4702	1311	49	56	102	878	79	11	146	58	474	75	60	93	25	359	3	7	57	13	10	16	19	7	0	1
Control	mCTRL0687	GCCCGTTGTGAGCGGCATGC	6190	1741	86	38	51	754	183	3923	495	357	105	144	114	78	56	35	77	55	184	35	29	8	612	13	11	22
Control	mCTRL0688	GAGCGCGGGCCAGCGAACGT	1785	520	39	833	2250	2658	17	62	150	1822	207	18	953	3594	46	1	28	49	7	67	12	19	68	23	24	12
Control	mCTRL0689	TCGGATCGGTACATAAAGTT	2919	1141	34	48	3206	73	82	685	23	51	11	25	90	24	287	207	0	2	0	5	1	5	23	0	0	4
Control	mCTRL0690	TGTCTGCCGCATACGCTATA	7164	2860	278	11088	919	3656	2009	5625	164	219	776	549	7059	1203	310	30	58	40	215	49	839	121	92	92	222	840
Control	mCTRL0691	TCACCCGCGTATACGACCTG	6605	1448	29	94	1349	524	654	61	31	27	313	106	4	102	19	7	31	57	5	9	30	30	9	10	12	18
Control	mCTRL0692	TGTGCCTACGCCATTCGGCT	6605	2216	276	987	269	3915	546	29	762	141	341	2353	1591	2123	753	323	63	5682	49	64	74	230	184	18	161	1690
Control	mCTRL0693	ACCATCCGATATTACGAGCA	2469	582	7	80	70	68	41	58	26	213	144	25	15	8	0	3	0	7	5	0	2	11	40	1	1	3
Control	mCTRL0694	GCTTCGGAGGCTACGTAGTA	1760	507	910	48	4	50	57	29	19	401	0	314	147	88	295	1219	9	2	4	5	4	14	4	7	2	2140
Control	mCTRL0695	TGAGCCGGTGCGCTCTCGGT	881	183	1	0	0	0	0	6	1	0	1	0	3	0	0	0	1	0	2	0	2	2	1	0	0	1
Control	mCTRL0696	TTTACGTATGCTGTGCGCGA	6088	1218	112	399	67	366	369	768	254	146	1449	180	4029	675	336	18	88	160	826	654	76	2301	1960	222	893	44
Control	mCTRL0697	TAACTCTAATGCGTTCCAAG	2037	973	190	94	0	71	231	25	432	20	12	6	290	44	2	0	4	1	0	10	8	16	11	64	6	307
Control	mCTRL0698	TATGAACCTCCGGATCGGTG	2429	301	0	0	6	13	6	3	9	3	10	16	11	15	2	4	5	0	0	6	3	2	0	0	0	0
Control	mCTRL0699	CGTTAATAAACGCGGTTTCA	252	11	0	0	0	0	0	0	0	0	0	0	0	0	0	0	0	0	0	0	0	0	0	0	0	0
Control	mCTRL0700	CGCCCCTAGTTGTCCCGCCC	11016	2621	82	119	690	584	566	136	180	170	164	38	110	91	148	125	159	51	19	177	204	37	46	66	13	10
Control	mCTRL0701	TTGTTTCAGCCTTGAGCGCG	4232	1037	115	892	2512	2738	248	572	4853	382	98	623	189	1207	65458	671	1021	6081	154	792	236	3419	167	1409	153	200
Control	mCTRL0702	CTCTCTGCGAGTCGATGATT	4552	1587	85	1510	290	500	1187	127	791	79	256	412	1815	208	75	4	24	6	907	39	42	125	1232	410	5	9
Control	mCTRL0703	CGAGTATCAGCATGTCGACG	3064	768	93	290	518	2729	163	146	306	24421	156	541	1096	131	159	19	697	16575	15	61	12	59	81	7	64	252
Control	mCTRL0704	AGTGCCGGGGGTGTATACCG	2551	176	3	0	8	4	16	3	0	3	1	1	3	44	0	0	2	0	0	0	0	0	1	4	0	1
Control	mCTRL0705	CGGTACCACGCCCCACCTCG	6227	1887	74	61	55	156	16	38	759	148	278	538	1059	71	1903	104	320	1889	21	19	22	33	703	26	12	1911
Control	mCTRL0706	GTACTGACGTTACGTTCATA	5670	1570	97	46	233	115	9338	79	128	219	299	73	159	504	133	16	23	65	35	28	0	293	146	27	401	19
Control	mCTRL0707	ACGCAAGCGGAACGCGTCTA	1633	546	76	11	72	20	0	5	342	3	1	111	26	290	105	15	0	3	2	58	155	2	0	1	7	9
Control	mCTRL0708	GAGCGTCCCGTGATTTAAAG	1806	567	12	13	50	6	0	288	3	64	20	6	3	67	3	31	15	2660	12	5	2	0	173	0	2	1
Control	mCTRL0709	GGTAAAAAGCGTAACGAGTA	974	74	1	3	1	2	15	15	0	1	1	0	3	2	0	0	1	0	3	0	0	0	1	4	0	0
Control	mCTRL0710	CGTGAATCGACCCTCAATAA	2728	719	3	6	49	35	65	13	10	2	430	17	11	28	1	28	19	2	11	1	2	10	1	11	4	9
Control	mCTRL0711	AGAGGCGGAGCAATACTCGC	2189	416	1	0	26	1	63	8	4	3	14	1	13	6	0	2	1	0	2	0	3	1	0	1	2	0
Control	mCTRL0712	TAGAGCAGATCCCCTCAACG	2429	347	164	2821	42	12	32	396	29	2	2	32	1612	7	16	14	3	0	1	0	410	6	3	10	2	1
Cramp1l	KY018395	CCGATACCTGAAGTCGTGCC	5163	1200	10	112	148	5129	87	47	102	8	44	124	77	73	14	18	7	23	17	54	9	154	25	8	20	8
Cramp1l	KY018396	AGAGGGTGGCCGGTGCAAAC	1354	444	44	167	2	41	1	1	14	35	8	21	3	7	3	0	62	1	4	0	0	324	0	3	2	15
Cramp1l	KY018397	TCTGTACTCGTGCCCAAGCG	4709	1407	2	5	15	10	75	8	40	23	14	7	27	202	12	18	9	23	62	5	16	277	58	6	17	31
Cramp1l	KY018398	CCCTTTATAACGTACTGTGG	4172	509	3	32	0	3	7	3	7	6	2	518	1	0	48	3	0	2	0	0	0	0	0	5	1	1
Cramp1l	KY018399	AGCACAGGGTGCGTCCTTCC	2127	926	6	10	13	1	104	47	17	17	22	4	19	18	7884	85	9	18	113	12	1	261	75	26	2	1
Cramp1l	MGLibA_11814	GGCGAGCTACGCAAGAAGAT	916	159	0	0	0	9	0	0	0	0	0	0	0	0	1	0	0	0	1	2	0	0	0	0	0	0
Cramp1l	MGLibA_11815	AGGTGCGGTAGTAAAAATGC	1275	263	0	0	8	5	11	0	2	0	1	0	3	7	0	0	1	2	2	0	0	0	0	1	0	1
Cramp1l	MGLibA_11816	CTCATACAGTCCCTCGAAGA	1957	401	7	21	17	1335	17	1	3	2	3	234	10	41	0	16	3	0	1	31	16	3	2086	12	506	3
Cramp1l	MGLibB_11813	CGCTCCTCCTCCCGGAACAT	5554	1320	11	424	4	69	911	167	5	14	22	28	5	10	0	0	0	17	2	2	5	3	0	0	11	5
Cramp1l	MGLibB_11814	AAGTCATCCCAGGAACTCTA	1424	274	0	1	8	0	0	2	0	1	19	2	71	1	2	24	4	0	2	3	2	5	0	0	0	0
Cramp1l	MGLibB_11815	TTGTTCTTCACCATGCTTGC	5740	1768	379	1380	1528	716	1340	360	383	465	372	138	272	697	158	213	780	80	102	197	677	134	609	43	562	46
Crebbp	KY018465	TGGATATTGCTGTGGACGAA	1864	344	2	0	85	0	29	34	5	0	0	7	3	0	0	0	0	0	0	0	8	1	0	0	0	1
Crebbp	KY018466	AAGTGCCTGGCGTAGCTCCT	3000	358	12	5	17	57	3	0	1	0	7	4	3	19	0	0	2	0	1	45	0	1	0	0	1	0
Crebbp	KY018467	ACCTACTTTTTTTGCGTGGC	3906	713	30	164	86	178	10	6	231	4	122	0	177	162	600	3	17	3	0	469	98	56	2	7	1	2
Crebbp	KY018468	TTTGCCAGTGAATCGCATGC	3892	1211	344	1716	870	443	534	559	3395	768	4123	352	371	922	193	227	113	245	83	825	53	57	836	84	192	665
Crebbp	KY018469	GCACTGGTGTTCGAAAAGGC	1461	230	2	52	4	11	2	22	20	2	0	1	3	10	26	0	2	25	16	0	0	0	0	0	0	1
Crebbp	MGLibA_11859	TAACTGGGGGTTCACTCCAG	2818	161	19	5	0	0	2	0	1	5	0	0	73	3	2234	28	2	4	1	0	0	0	0	0	0	0
Crebbp	MGLibA_11860	GGACAACCCTTTAGTCAAAC	1060	247	5	0	0	0	3	0	0	0	0	2	6	0	0	2	0	0	0	0	0	0	0	1	0	0
Crebbp	MGLibA_11861	TTGTTGGTTTCGCTTGTCAC	6339	1688	175	95	434	798	221	1924	4337	874	1178	825	1774	855	1522	76	339	1599	494	320	142	121	1737	336	67	231
Crebbp	MGLibB_11858	CCATTGGGGATCAGCTCATC	3563	654	7	96	2	136	1267	85	45	3	5	56	10	15	1735	20	0	3	2	1	3	1	4	0	23	1
Crebbp	MGLibB_11859	CACGACAAATCATCTCTCAT	3913	1007	14	379	85	324	1372	48	50	63	164	135	10474	624	13	4	2	10	14	6	19	10	124	592	676	9
Crebbp	MGLibB_11860	CCTGATGAGCTGATCCCCAA	2829	391	12	12	1	48	58	2	0	1255	3	3	9	20	10	1	32	17	0	0	1	3	0	231	0	2
Csf2	KY018783	GACCCTGCTCGAATATCTTC	2326	1029	14	9	32	892	105	29	94	10	217	17	15	17	1	7	20	4	3	0	27	4	0	386	15	11
Csf2	KY018784	ATATTCGAGCAGGGTCTACG	2217	524	113	37	1496	13	26	14	7	44	112	5	3	67	1	3	2	3	8	542	13	11	23	4	24	1
Csf2	KY018785	CGCCTGAAGATATTCGAGCA	2103	1051	55	255	672	72	64	69	61	7	0	87	24	34	0	4	7	154	6503	5	3	2045	6	4	5	57
Csf2	KY018786	AGAGAAGCAGCTTACCTTGA	1820	622	0	68	7	4	245	61	3	3	14	8	195	1	15	0	12	4	7	52	1	26	15	0	1	15
[truncated: 5,782 more rows]
