# Supplementary material for: Epigenetic CRISPR Screens Identify Npm1 as a Therapeutic Vulnerability in Non–Small Cell Lung Cancer
Source: Oxford University Press journal article supplement (doi:10.1158/0008-5472.can-19-3782), 2020-07-09
Supplement: 00085472can193782-sup-233330_3_supp_6380847_qcfg17.xlsx [file 00085472can193782-sup-233330_3_supp_6380847_qcfg17.xlsx]

## Sheet: In vitro Clone 7
id	num	neg|score	neg|p-value	neg|fdr	neg|rank	neg|goodsgrna	neg|lfc	pos|score	pos|p-value	pos|fdr	pos|rank	pos|goodsgrna	pos|lfc
Plk1	10	5.3045e-12	4.9479e-06	0.00018	1	10	-1.6169	1	1	0.999995	727	0	-1.6169
Eif6	11	3.1127e-10	4.9479e-06	0.00018	2	11	-1.3447	1	1	0.999995	726	0	-1.3447
Rpl23a	8	1.087e-09	4.9479e-06	0.00018	3	8	-1.6621	1	1	0.999995	725	0	-1.6621
Terf1	11	8.4982e-09	4.9479e-06	0.00018	4	9	-2.1719	0.99997	0.99998	0.999995	714	0	-2.1719
Dmap1	11	1.5615e-08	4.9479e-06	0.00018	5	10	-1.4547	0.97079	0.97044	0.999995	646	0	-1.4547
Huwe1	11	1.7616e-08	4.9479e-06	0.00018	6	8	-2.0066	0.8708	0.87088	0.999995	568	0	-2.0066
Carm1	10	1.9433e-08	4.9479e-06	0.00018	7	9	-1.1621	0.9955	0.99528	0.999995	676	0	-1.1621
Rpl9	6	2.5065e-08	4.9479e-06	0.00018	8	6	-2.1512	1	1	0.999995	724	0	-2.1512
Smc4	11	4.168e-08	4.9479e-06	0.00018	9	9	-1.6896	0.99978	0.99982	0.999995	705	0	-1.6896
Kat8	10	4.3586e-08	4.9479e-06	0.00018	10	7	-1.8527	0.99925	0.99917	0.999995	698	0	-1.8527
Prmt5	9	5.466e-08	4.9479e-06	0.00018	11	7	-1.6299	0.99954	0.99949	0.999995	701	0	-1.6299
Smc2	11	6.4396e-08	4.9479e-06	0.00018	12	9	-1.583	0.29332	0.29506	0.999995	181	1	-1.583
Map3k7	11	1.544e-07	4.9479e-06	0.00018	13	8	-1.1716	0.99921	0.99926	0.999995	697	0	-1.1716
Rcc1	8	1.8941e-07	4.9479e-06	0.00018	14	7	-1.4327	0.96579	0.96583	0.999995	639	0	-1.4327
Rbbp4	10	2.2306e-07	4.9479e-06	0.00018	15	9	-1.2533	1	1	0.999995	723	0	-1.2533
Sin3a	11	3.2831e-07	1.4844e-05	0.000491	16	9	-1.1726	0.99642	0.99662	0.999995	679	0	-1.1726
Kras	8	3.4195e-07	4.9479e-06	0.00018	17	7	-1.0745	0.98566	0.98595	0.999995	662	0	-1.0745
Nfs1	10	4.8864e-07	4.9479e-06	0.00018	18	8	-1.3068	0.99993	0.99992	0.999995	712	0	-1.3068
Smc1a	10	5.1265e-07	4.9479e-06	0.00018	19	6	-1.839	0.042272	0.073778	0.999995	40	1	-1.839
Smarcb1	10	9.6949e-07	4.9479e-06	0.00018	20	8	-0.88894	0.14129	0.15451	0.999995	88	1	-0.88894
Rpl32	9	1.0074e-06	4.9479e-06	0.00018	21	7	-1.7486	0.96352	0.96354	0.999995	635	0	-1.7486
Prpf19	11	1.1071e-06	2.4739e-05	0.000692	22	8	-1.2412	0.99842	0.99848	0.999995	686	0	-1.2412
Cdc5l	11	1.4415e-06	2.4739e-05	0.000692	23	9	-1.1078	0.99998	1	0.999995	716	0	-1.1078
Rpl7	8	2.3727e-06	1.4844e-05	0.000491	24	6	-1.2865	0.038944	0.060825	0.999995	37	1	-1.2865
Chmp5	9	2.6775e-06	2.4739e-05	0.000692	25	7	-1.1906	0.92518	0.92536	0.999995	604	0	-1.1906
Ruvbl2	11	2.7702e-06	3.4635e-05	0.000899	26	8	-1.4372	0.756	0.7555	0.999995	483	0	-1.4372
Phb	8	3.5164e-06	2.4739e-05	0.000692	27	7	-1.186	1	1	0.999995	721	0	-1.186
Gtf3c4	11	5.0551e-06	4.4531e-05	0.001079	28	8	-1.3779	0.99386	0.99402	0.999995	673	0	-1.3779
Aurkb	9	5.413e-06	4.4531e-05	0.001079	29	6	-1.2024	0.99997	0.99997	0.999995	713	0	-1.2024
Chaf1b	10	6.6624e-06	3.4635e-05	0.000899	30	8	-1.3209	0.99664	0.99644	0.999995	680	0	-1.3209
Elp3	11	8.4037e-06	6.4323e-05	0.001375	31	8	-1.1197	0.99277	0.99294	0.999995	672	0	-1.1197
Terf2	11	9.4245e-06	6.4323e-05	0.001375	32	8	-0.87732	0.99955	0.9996	0.999995	702	0	-0.87732
Vhl	11	1.2902e-05	0.00010391	0.002042	33	8	-1.2296	0.96247	0.96199	0.999995	632	0	-1.2296
Myc	10	1.3987e-05	6.4323e-05	0.001375	34	7	-1.2414	0.99998	0.99998	0.999995	715	0	-1.2414
Mybl2	9	1.429e-05	9.401e-05	0.001898	35	7	-1.4967	0.99999	0.99999	0.999995	719	0	-1.4967
Ash2l	9	1.4482e-05	9.401e-05	0.001898	36	7	-0.89363	0.87426	0.87393	0.999995	571	0	-0.89363
Rps17	6	1.5358e-05	6.4323e-05	0.001375	37	6	-1.1184	0.99998	1	0.999995	718	0	-1.1184
Cdk9	10	2.2484e-05	0.00014349	0.002745	38	7	-0.9049	0.98443	0.98403	0.999995	661	0	-0.9049
Dnajc2	11	3.6853e-05	0.00024245	0.004299	39	7	-1.0902	0.51619	0.51662	0.999995	326	0	-1.0902
Gars	10	3.7219e-05	0.00021276	0.003966	40	7	-0.88726	0.99993	0.99992	0.999995	711	0	-0.88726
Chmp2a	9	3.7757e-05	0.00023255	0.004227	41	7	-0.71682	0.99847	0.99831	0.999995	687	0	-0.71682
Mis18bp1	10	4.5274e-05	0.00028203	0.004882	42	7	-1.0252	0.999	0.99886	0.999995	693	0	-1.0252
Dpf2	11	4.5822e-05	0.00032161	0.005438	43	7	-0.87462	0.99972	0.99977	0.999995	704	0	-0.87462
Ube2n	9	5.5414e-05	0.00033151	0.005477	44	7	-1.1092	0.9999	0.99987	0.999995	709	0	-1.1092
Sf3b3	10	5.7546e-05	0.00037109	0.005865	45	7	-1.0345	0.86958	0.86875	0.999995	567	0	-1.0345
Hdac3	10	5.8464e-05	0.00037109	0.005865	46	7	-1.0081	0.99852	0.99831	0.999995	689	0	-1.0081
Brd4	10	7.3406e-05	0.00048984	0.007268	47	6	-0.98664	0.060672	0.091462	0.999995	50	1	-0.98664
Aurka	10	7.5242e-05	0.00048984	0.007268	48	7	-0.98353	0.99987	0.99981	0.999995	708	0	-0.98353
Setd2	11	8.3009e-05	0.0005789	0.008417	49	7	-0.83872	0.7036	0.70319	0.999995	445	0	-0.83872
Rae1	10	9.1314e-05	0.0005987	0.008534	50	7	-0.96166	1	1	0.999995	722	0	-0.96166
Rnf20	11	9.9068e-05	0.00067786	0.009434	51	7	-0.93696	0.99992	0.99995	0.999995	710	0	-0.93696
Brd8	11	0.00010175	0.00068776	0.009434	52	7	-0.87884	0.61168	0.61122	0.999995	376	0	-0.87884
Rps19	8	0.00010316	0.00048984	0.007268	53	6	-0.87775	0.99823	0.99813	0.999995	684	0	-0.87775
Npm1	10	0.00011713	0.00076692	0.010325	54	7	-0.71307	0.98621	0.98567	0.999995	666	0	-0.71307
Yeats4	10	0.00013281	0.00085599	0.011113	55	6	-0.87665	0.3679	0.36604	0.999995	238	0	-0.87665
Smc3	11	0.00013605	0.00094505	0.012054	56	6	-0.69463	0.13338	0.15443	0.999995	83	1	-0.69463
Jmjd6	11	0.00014806	0.0010341	0.012962	57	7	-0.67681	0.31067	0.31142	0.999995	192	1	-0.67681
Uhrf1	11	0.00015467	0.0010638	0.01301	58	7	-0.65286	0.79453	0.79423	0.999995	508	0	-0.65286
Taf5	11	0.00016968	0.0011529	0.013518	59	7	-0.83861	0.99937	0.99946	0.999995	699	0	-0.83861
Phf23	10	0.0001844	0.0011133	0.013268	60	7	-0.64057	0.91657	0.91589	0.999995	595	0	-0.64057
Rpl7a	8	0.00018514	0.0008263	0.010922	61	5	-0.98176	0.68663	0.68788	0.999995	430	0	-0.98176
Polr2b	10	0.00019637	0.0011924	0.013545	62	7	-0.9777	0.012155	0.024398	0.886871	20	1	-0.9777
Rbbp7	11	0.00020009	0.0014102	0.015301	63	7	-0.90856	0.99915	0.99923	0.999995	696	0	-0.90856
Noc4l	7	0.00021957	0.0011825	0.013545	64	5	-1.3338	0.99966	0.99969	0.999995	703	0	-1.3338
Wrb	10	0.00023261	0.0013805	0.015206	65	6	-0.84712	0.94809	0.94716	0.999995	616	0	-0.84712
Rps7	8	0.0002336	0.0010737	0.01301	66	6	-0.85304	0.95546	0.95531	0.999995	626	0	-0.85304
Cdc73	9	0.00024729	0.0012914	0.014444	67	6	-0.69027	0.80129	0.80167	0.999995	513	0	-0.69027
Brd9	11	0.00029061	0.0019841	0.020905	68	7	-0.64292	0.68381	0.68362	0.999995	429	0	-0.64292
Atrx	11	0.00031782	0.0022216	0.023073	69	6	-0.8515	0.93585	0.9349	0.999995	610	0	-0.8515
Brca2	11	0.00032641	0.002281	0.023356	70	7	-0.71252	0.99998	1	0.999995	717	0	-0.71252
Atp6v0c	6	0.00033436	0.0017268	0.018462	71	5	-1.2986	0.99986	0.99977	0.999995	707	0	-1.2986
Prmt1	10	0.00064307	0.0030627	0.030925	72	5	-0.61557	0.65588	0.65376	0.999995	412	0	-0.61557
Phf12	10	0.000709	0.0033893	0.033754	73	6	-0.75419	0.98154	0.98113	0.999995	659	0	-0.75419
Taf1	11	0.00076604	0.0044976	0.042558	74	6	-0.71142	0.96946	0.96922	0.999995	643	0	-0.71142
Ube2i	10	0.00082116	0.0039336	0.038645	75	6	-0.63817	0.43203	0.42919	0.999995	269	0	-0.63817
Set	6	0.00090958	0.0040919	0.039664	76	4	-0.92919	0.73884	0.73771	0.999995	472	0	-0.92919
Taf8	9	0.00096892	0.0045075	0.042558	77	5	-0.844	0.999	0.99885	0.999995	694	0	-0.844
Ruvbl1	11	0.0010949	0.0058237	0.053593	78	6	-0.66992	0.95966	0.95962	0.999995	630	0	-0.66992
Msl3	8	0.0013384	0.0054575	0.050867	79	3	-0.19944	0.76599	0.76609	0.999995	486	0	-0.19944
Snapc4	11	0.0013574	0.0070409	0.063194	80	5	-0.53632	0.43865	0.43954	0.999995	274	0	-0.53632
Gmeb2	11	0.0014061	0.0072685	0.064441	81	6	-0.64859	0.99953	0.99958	0.999995	700	0	-0.64859
Sap18	8	0.0015033	0.0061799	0.05616	82	5	-0.85571	0.12759	0.13498	0.999995	81	1	-0.85571
Chmp4b	11	0.0015344	0.0078523	0.06663	83	6	-0.64213	0.99568	0.99598	0.999995	678	0	-0.64213
Chd8	11	0.0015422	0.007882	0.06663	84	6	-0.6361	0.99739	0.99747	0.999995	681	0	-0.6361
Eif3a	10	0.0015989	0.0074367	0.065138	85	6	-0.70903	0.21147	0.21486	0.999995	129	1	-0.70903
Dnmt1	11	0.001769	0.0090101	0.075291	86	5	-0.5307	0.065203	0.10146	0.999995	53	1	-0.5307
Kdm8	6	0.001914	0.0077336	0.06663	87	4	-0.77014	0.64115	0.63897	0.999995	403	0	-0.77014
Smarca4	10	0.0020312	0.0093466	0.076752	88	5	-0.55572	0.97235	0.97149	0.999995	649	0	-0.55572
Brca1	11	0.0022994	0.011256	0.089928	89	6	-0.60259	0.99519	0.99547	0.999995	675	0	-0.60259
Smndc1	8	0.0023108	0.0093961	0.076752	90	5	-0.69896	0.99999	0.99999	0.999995	720	0	-0.69896
Taf10	11	0.0024584	0.012009	0.094894	91	4	-0.081815	0.95516	0.95494	0.999995	623	0	-0.081815
Suds3	8	0.0026635	0.010821	0.08741	92	5	-0.70068	0.99867	0.9986	0.999995	691	0	-0.70068
Bptf	10	0.0029757	0.012731	0.09952	93	5	-0.48339	0.99789	0.99774	0.999995	682	0	-0.48339
Zmynd8	11	0.0036934	0.017313	0.132488	94	6	-0.55936	0.99264	0.99279	0.999995	671	0	-0.55936
Polr2d	9	0.0042464	0.016392	0.126779	95	5	-0.62134	0.1514	0.16108	0.999995	94	1	-0.62134
Phf6	9	0.004716	0.018055	0.136728	96	5	-0.61664	0.97745	0.9777	0.999995	652	0	-0.61664
Smarca5	9	0.004868	0.018659	0.138416	97	5	-0.60601	0.97027	0.97014	0.999995	644	0	-0.60601
Brd1	10	0.0052052	0.020608	0.151333	98	5	-0.59785	0.99979	0.99971	0.999995	706	0	-0.59785
Supt5	6	0.0052617	0.018243	0.136728	99	4	-0.63784	0.39143	0.389	0.999995	255	0	-0.63784
Setd1a	10	0.005891	0.022934	0.163457	100	4	-0.3427	0.86306	0.86202	0.999995	560	0	-0.3427
Supt4a	6	0.0066436	0.02228	0.160375	101	3	-0.58434	0.7396	0.7385	0.999995	474	0	-0.58434
Phf20	9	0.0073226	0.027476	0.19393	102	5	-0.5607	0.25444	0.25528	0.999995	158	1	-0.5607
Ttf1	11	0.0076847	0.031731	0.219699	103	4	-0.28868	0.73774	0.73765	0.999995	469	0	-0.28868
Taf9	5	0.0078954	0.021657	0.157446	104	3	-0.87115	0.97874	0.97812	0.999995	654	0	-0.87115
Mier1	9	0.0081344	0.030504	0.213233	105	5	-0.54568	0.27644	0.27713	0.999995	175	0	-0.54568
Zzz3	11	0.0091601	0.036135	0.245512	106	3	-0.18077	0.68082	0.68042	0.999995	428	0	-0.18077
Sp110	9	0.010055	0.035739	0.245113	107	3	-0.38347	0.12194	0.13554	0.999995	78	1	-0.38347
Psmd1	10	0.011423	0.040904	0.27282	108	4	-0.22378	0.24209	0.24223	0.999995	151	1	-0.22378
Ccnt1	11	0.012425	0.046476	0.30098	109	5	-0.53477	0.24107	0.24605	0.999995	150	1	-0.53477
Rbbp5	10	0.012607	0.044675	0.295258	110	5	-0.54847	0.96446	0.96338	0.999995	637	0	-0.54847
Kat5	10	0.01317	0.046278	0.30098	111	3	0.073018	0.33211	0.33018	0.999995	206	0	0.073018
Kmt2b	5	0.014546	0.037154	0.2501	112	3	-0.70719	0.70924	0.70713	0.999995	453	0	-0.70719
Chd4	11	0.016441	0.058826	0.375142	113	4	-0.18159	0.89617	0.8961	0.999995	584	0	-0.18159
Asxl1	11	0.017385	0.061715	0.383478	114	5	-0.46237	0.33841	0.33904	0.999995	211	0	-0.46237
Kmt2d	6	0.017425	0.046782	0.30098	115	3	-0.68156	0.94059	0.94156	0.999995	613	0	-0.68156
Prdm15	11	0.018561	0.065386	0.399782	116	5	-0.45288	0.33548	0.33632	0.999995	207	0	-0.45288
Wnk1	9	0.019473	0.059568	0.376572	117	2	0.10777	0.098981	0.11577	0.999995	70	1	0.10777
Atf7ip	10	0.021568	0.067089	0.399782	118	4	-0.43151	0.72584	0.72506	0.999995	461	0	-0.43151
Kif11	8	0.022179	0.065891	0.399782	119	3	-0.36297	0.27518	0.27434	0.999995	172	0	-0.36297
Alg10b	9	0.022354	0.066465	0.399782	120	4	-0.17059	0.5306	0.53186	0.999995	334	0	-0.17059
Mphosph8	9	0.022503	0.06695	0.399782	121	4	-0.325	0.99841	0.99825	0.999995	685	0	-0.325
Rbx1	8	0.023419	0.069038	0.404995	122	3	-0.18724	0.1412	0.14646	0.999995	87	1	-0.18724
Cramp1l	11	0.023758	0.08028	0.463201	123	4	-0.3842	0.83057	0.83056	0.999995	535	0	-0.3842
Nelfa	6	0.024513	0.061448	0.383478	124	3	-0.58991	0.99866	0.99877	0.999995	690	0	-0.58991
Sp140	8	0.026657	0.077321	0.449698	125	4	-0.53283	0.96431	0.96431	0.999995	636	0	-0.53283
Supt6	6	0.028325	0.069078	0.404995	126	3	-0.4673	0.953	0.95378	0.999995	620	0	-0.4673
Kdm2a	11	0.029931	0.094144	0.52648	127	4	-0.09058	0.00070735	0.0024987	0.181655	10	1	-0.09058
Arid4b	10	0.030345	0.087899	0.503172	128	4	-0.38625	0.65785	0.65562	0.999995	414	0	-0.38625
Setdb1	11	0.031503	0.097578	0.541518	129	4	-0.39503	0.99084	0.99121	0.999995	670	0	-0.39503
Nat10	11	0.032193	0.099171	0.54619	130	4	-0.41004	0.96283	0.96233	0.999995	634	0	-0.41004
Taf12	10	0.032705	0.093857	0.52648	131	2	-0.14061	0.23605	0.23683	0.999995	143	1	-0.14061
Rbm14	11	0.034077	0.10306	0.563342	132	4	-0.39849	0.55051	0.55139	0.999995	349	0	-0.39849
Mrgbp	6	0.039967	0.093639	0.52648	133	3	-0.27355	0.72069	0.7195	0.999995	459	0	-0.27355
Orc1	11	0.043119	0.12255	0.662057	134	4	-0.24653	0.94976	0.94926	0.999995	618	0	-0.24653
Crebbp	11	0.043257	0.12294	0.662057	135	4	-0.42077	0.90042	0.9002	0.999995	587	0	-0.42077
Sp100	9	0.051466	0.13309	0.708896	136	2	0.09691	0.218	0.22081	0.999995	132	1	0.09691
Chaf1a	8	0.056692	0.13359	0.708896	137	1	-0.25614	0.88944	0.88941	0.999995	580	0	-0.25614
Suz12	11	0.05868	0.15575	0.820483	138	4	-0.45911	0.5292	0.52989	0.999995	333	0	-0.45911
Smarcd1	10	0.061797	0.1593	0.833161	139	4	-0.18839	0.98599	0.98538	0.999995	664	0	-0.18839
Dicer1	11	0.071586	0.1827	0.928837	140	4	-0.35941	0.78736	0.78695	0.999995	499	0	-0.35941
Hdac2	9	0.074094	0.17142	0.883846	141	2	-0.022687	0.071166	0.092659	0.999995	56	1	-0.022687
Ino80	11	0.076734	0.19308	0.956663	142	4	-0.31491	0.099233	0.12694	0.999995	71	1	-0.31491
Ep400	11	0.076929	0.19344	0.956663	143	4	-0.28369	0.4104	0.41099	0.999995	264	0	-0.28369
Hmga1-rs1	7	0.077028	0.16593	0.861639	144	1	0.093503	0.24047	0.2376	0.999995	148	0	0.093503
Morf4l1	9	0.077067	0.17638	0.903004	145	2	0.0069157	0.69969	0.70178	0.999995	441	0	0.0069157
Yeats2	11	0.07771	0.19517	0.958706	146	4	-0.16272	0.97798	0.97813	0.999995	653	0	-0.16272
Sap130	11	0.08701	0.21324	0.999995	147	4	-0.47225	0.97289	0.97287	0.999995	650	0	-0.47225
Nat9	9	0.087148	0.19265	0.956663	148	3	-0.30544	0.44312	0.44369	0.999995	277	0	-0.30544
Smarce1	9	0.087592	0.1934	0.956663	149	3	-0.34626	0.87371	0.87339	0.999995	570	0	-0.34626
Cxxc1	10	0.093841	0.2086	0.999995	150	3	-0.29329	0.81118	0.80999	0.999995	522	0	-0.29329
Baz1b	10	0.096922	0.21307	0.999995	151	3	-0.078402	0.46807	0.46541	0.999995	301	0	-0.078402
Vdac1	9	0.10162	0.21584	0.999995	152	3	-0.30049	0.85635	0.85588	0.999995	556	0	-0.30049
Meaf6	9	0.10404	0.21983	0.999995	153	3	-0.19127	0.27818	0.27892	0.999995	176	0	-0.19127
Mecom	9	0.10963	0.22828	0.999995	154	3	-0.38163	0.84169	0.84184	0.999995	542	0	-0.38163
Smn1	10	0.11053	0.23318	0.999995	155	3	-0.42495	0.65291	0.65068	0.999995	411	0	-0.42495
Whsc1l1	9	0.11213	0.23205	0.999995	156	3	-0.17328	0.73327	0.73442	0.999995	467	0	-0.17328
Smyd4	10	0.11225	0.23564	0.999995	157	2	-0.12504	0.53727	0.53592	0.999995	338	0	-0.12504
Dimt1	10	0.11692	0.2422	0.999995	158	3	-0.080945	0.96741	0.96654	0.999995	640	0	-0.080945
C920025E04Rik	6	0.11813	0.20387	0.994713	159	2	-0.33198	0.28955	0.2887	0.999995	179	0	-0.33198
Cbx1	10	0.11859	0.24485	0.999995	160	1	-0.10684	0.030863	0.055313	0.999995	28	2	-0.10684
Eif3b	11	0.12174	0.26302	0.999995	161	3	-0.25261	0.039846	0.070621	0.999995	38	2	-0.25261
Taf3	11	0.13198	0.27694	0.999995	162	3	-0.25369	0.73437	0.73429	0.999995	468	0	-0.25369
Ctcf	10	0.13229	0.26441	0.999995	163	3	0.0022226	0.21251	0.21555	0.999995	131	1	0.0022226
Phc1	9	0.14538	0.28362	0.999995	164	1	0.041981	0.86634	0.86589	0.999995	566	0	0.041981
Prr14	11	0.14661	0.29667	0.999995	165	2	-0.25169	0.74314	0.74282	0.999995	476	0	-0.25169
Tdrd12	9	0.1615	0.30907	0.999995	166	2	-0.017252	0.50889	0.51021	0.999995	324	0	-0.017252
Setd8	9	0.16399	0.31306	0.999995	167	2	-0.17902	0.99799	0.998	0.999995	683	0	-0.17902
H2-Q1	9	0.16488	0.3144	0.999995	168	3	-0.12504	0.43411	0.43494	0.999995	271	0	-0.12504
Psma3	6	0.17245	0.26916	0.999995	169	2	-0.20396	0.94842	0.94924	0.999995	617	0	-0.20396
Sirt5	10	0.17327	0.32366	0.999995	170	1	-0.064679	0.8517	0.85055	0.999995	552	0	-0.064679
Asxl2	6	0.17617	0.27383	0.999995	171	2	-0.38326	0.93858	0.93948	0.999995	611	0	-0.38326
Dnajc1	11	0.1772	0.33727	0.999995	172	3	-0.4459	0.99911	0.9992	0.999995	695	0	-0.4459
Kat6b	6	0.18078	0.2792	0.999995	173	2	0.4514	0.033862	0.045427	0.999995	31	1	0.4514
Ncor2	10	0.20774	0.37413	0.999995	174	3	-0.395	0.44428	0.44164	0.999995	278	0	-0.395
Chd9	11	0.21055	0.38027	0.999995	175	3	-0.097123	0.87363	0.87395	0.999995	569	0	-0.097123
Elmsan1	6	0.21255	0.31835	0.999995	176	2	-0.35314	0.081602	0.087355	0.999995	63	1	-0.35314
Phip	11	0.21845	0.39033	0.999995	177	3	-0.39878	0.10565	0.1319	0.999995	73	1	-0.39878
Ccnt2	11	0.22006	0.39264	0.999995	178	2	-0.04974	0.073158	0.10743	0.999995	60	1	-0.04974
Glt28d2	9	0.22127	0.36849	0.999995	179	2	-0.14219	0.48371	0.48458	0.999995	306	0	-0.14219
Lbr	10	0.22492	0.3921	0.999995	180	2	0.18025	0.8766	0.87619	0.999995	574	0	0.18025
Ring1	10	0.23081	0.39715	0.999995	181	2	0.18725	0.79042	0.78915	0.999995	504	0	0.18725
Dpep2	11	0.23187	0.40828	0.999995	182	2	0.053231	0.22551	0.23165	0.999995	136	1	0.053231
Phc2	6	0.23248	0.34274	0.999995	183	2	-0.29261	0.81949	0.81803	0.999995	527	0	-0.29261
Pick1	10	0.23302	0.39893	0.999995	184	1	0.22292	0.63254	0.63063	0.999995	395	0	0.22292
Prdm10	11	0.23598	0.41366	0.999995	185	3	-0.11829	0.75678	0.75616	0.999995	484	0	-0.11829
2410016O06Rik	10	0.23605	0.40134	0.999995	186	2	-0.18409	0.34189	0.34006	0.999995	215	0	-0.18409
Alkbh1	11	0.23757	0.41572	0.999995	187	3	-0.095793	0.23776	0.24287	0.999995	146	1	-0.095793
Tdrkh	10	0.24314	0.4071	0.999995	188	2	-0.12371	0.97984	0.97934	0.999995	656	0	-0.12371
Cecr2	11	0.24317	0.42299	0.999995	189	3	-0.10866	0.7771	0.77709	0.999995	492	0	-0.10866
Ing3	8	0.24593	0.37407	0.999995	190	2	0.019495	0.35913	0.35875	0.999995	230	0	0.019495
Piwil4	11	0.24637	0.42697	0.999995	191	3	-0.026396	0.53558	0.53647	0.999995	337	0	-0.026396
Mbd4	9	0.24799	0.39286	0.999995	192	2	-0.37118	0.78768	0.78775	0.999995	500	0	-0.37118
Mllt10	10	0.25106	0.41332	0.999995	193	1	0.088246	0.60333	0.60184	0.999995	373	0	0.088246
H2-Q7	7	0.25392	0.37311	0.999995	194	2	-0.27077	0.98746	0.98788	0.999995	667	0	-0.27077
Alg13	11	0.25566	0.43871	0.999995	195	3	-0.048622	0.95583	0.9557	0.999995	627	0	-0.048622
Hdac7	11	0.2585	0.44242	0.999995	196	3	-0.21371	0.70593	0.7056	0.999995	450	0	-0.21371
Men1	10	0.26101	0.42098	0.999995	197	2	-0.20395	0.79479	0.79369	0.999995	509	0	-0.20395
Il12a	7	0.26926	0.39014	0.999995	198	2	0.087882	0.36697	0.36725	0.999995	237	0	0.087882
Suv420h2	9	0.27097	0.4144	0.999995	199	2	-0.12929	0.9656	0.96585	0.999995	638	0	-0.12929
Ash1l	11	0.27558	0.45664	0.999995	200	2	-0.15248	0.83694	0.83669	0.999995	540	0	-0.15248
Phf11d	6	0.27668	0.38205	0.999995	201	1	0.043952	0.0019282	0.0045867	0.303139	11	1	0.043952
Gsg2	9	0.27912	0.42157	0.999995	202	2	-0.13987	0.66636	0.66733	0.999995	418	0	-0.13987
Tgfb2	9	0.28274	0.42517	0.999995	203	2	-0.041094	0.87734	0.8773	0.999995	575	0	-0.041094
Sin3b	9	0.2832	0.42549	0.999995	204	2	-0.18527	0.98068	0.98071	0.999995	658	0	-0.18527
Chd2	11	0.28576	0.46433	0.999995	205	2	-0.061633	0.46166	0.46259	0.999995	294	0	-0.061633
Trim33	10	0.28699	0.44328	0.999995	206	2	0.032843	0.38306	0.38131	0.999995	253	0	0.032843
Cbx4	10	0.29826	0.45278	0.999995	207	1	0.15066	0.30571	0.30389	0.999995	187	0	0.15066
Ube2v1	9	0.3146	0.45522	0.999995	208	1	-0.23902	0.99561	0.99575	0.999995	677	0	-0.23902
Ccdc79	11	0.317	0.488	0.999995	209	2	0.16783	0.55153	0.55234	0.999995	352	0	0.16783
Zfp57	10	0.31706	0.46876	0.999995	210	2	0.11834	0.26872	0.26701	0.999995	166	1	0.11834
Prkaa1	9	0.32273	0.4628	0.999995	211	2	-0.0070658	0.82961	0.82965	0.999995	533	0	-0.0070658
Ezh1	11	0.32522	0.49423	0.999995	212	2	0.11535	0.46647	0.46733	0.999995	298	0	0.11535
Aire	9	0.32773	0.46742	0.999995	213	1	-0.10655	0.44586	0.44646	0.999995	281	0	-0.10655
Braf	9	0.32954	0.46913	0.999995	214	2	0.28955	0.36578	0.3661	0.999995	236	0	0.28955
Brd2	6	0.332	0.41228	0.999995	215	1	-0.30614	0.94197	0.94289	0.999995	614	0	-0.30614
Ctcfl	10	0.33211	0.48167	0.999995	216	1	-0.07334	0.39216	0.39075	0.999995	256	0	-0.07334
Kdm5a	11	0.33288	0.5004	0.999995	217	2	-0.025866	0.97989	0.97989	0.999995	657	0	-0.025866
Rere	11	0.33397	0.50112	0.999995	218	2	0.34622	0.069188	0.10455	0.999995	54	1	0.34622
Ctnnb1	8	0.33652	0.46798	0.999995	219	2	-0.31088	0.20396	0.20427	0.999995	124	1	-0.31088
Hemk1	10	0.34012	0.48867	0.999995	220	1	0.070345	0.62622	0.62481	0.999995	391	0	0.070345
Gm11127	9	0.3418	0.48084	0.999995	221	2	0.042847	0.566	0.56669	0.999995	359	0	0.042847
Gatad2a	11	0.34435	0.50918	0.999995	222	2	-0.070183	0.25201	0.25592	0.999995	157	1	-0.070183
Rnf17	11	0.34871	0.51263	0.999995	223	2	-0.24039	0.86472	0.86459	0.999995	564	0	-0.24039
Nfkb2	11	0.35416	0.51697	0.999995	224	2	-0.092559	0.53909	0.53957	0.999995	340	0	-0.092559
Chd5	11	0.3547	0.51741	0.999995	225	2	0.22138	0.52562	0.52627	0.999995	331	0	0.22138
Cml1	9	0.3572	0.4956	0.999995	226	2	0.13425	0.83008	0.83011	0.999995	534	0	0.13425
Ciita	11	0.36231	0.52338	0.999995	227	1	0.07487	0.56566	0.56599	0.999995	358	0	0.07487
Smad2	8	0.36257	0.49624	0.999995	228	2	-0.22894	0.99847	0.99841	0.999995	688	0	-0.22894
Chmp4c	11	0.36502	0.52546	0.999995	229	2	-0.0029955	0.91781	0.91744	0.999995	596	0	-0.0029955
Mbd5	11	0.36556	0.52595	0.999995	230	2	-0.22697	0.93079	0.92991	0.999995	607	0	-0.22697
Stk31	10	0.3679	0.51346	0.999995	231	1	0.064978	0.7218	0.72075	0.999995	460	0	0.064978
L3mbtl2	11	0.36792	0.52755	0.999995	232	1	0.044622	0.8444	0.84427	0.999995	548	0	0.044622
Ube2b	9	0.36964	0.50712	0.999995	233	1	0.015232	0.32447	0.32545	0.999995	202	0	0.015232
Supt3	6	0.37388	0.43652	0.999995	234	1	0.050838	0.34567	0.34416	0.999995	218	0	0.050838
Arid1b	10	0.37543	0.52012	0.999995	235	2	-0.22238	0.83649	0.83558	0.999995	539	0	-0.22238
Glyr1	10	0.37889	0.52333	0.999995	236	2	-0.055331	0.73062	0.72999	0.999995	464	0	-0.055331
Egfr	11	0.3807	0.53792	0.999995	237	2	-0.34974	0.99899	0.99907	0.999995	692	0	-0.34974
Sirt3	11	0.38124	0.53846	0.999995	238	2	0.01744	0.95406	0.95387	0.999995	622	0	0.01744
Msh6	11	0.38501	0.54155	0.999995	239	2	-0.099835	0.33938	0.33992	0.999995	212	0	-0.099835
H2-DMb1	9	0.38781	0.52533	0.999995	240	2	0.16675	0.46142	0.46183	0.999995	293	0	0.16675
Ido2	9	0.38871	0.52608	0.999995	241	2	0.11882	0.54804	0.54935	0.999995	345	0	0.11882
Baz2a	9	0.39943	0.53677	0.999995	242	2	0.30968	0.28594	0.28677	0.999995	178	0	0.30968
Ncor1	9	0.40121	0.53864	0.999995	243	2	-0.20119	0.78385	0.78362	0.999995	497	0	-0.20119
Mtf2	10	0.40152	0.5441	0.999995	244	2	0.017376	0.66223	0.66044	0.999995	416	0	0.017376
Dxo	6	0.40957	0.4588	0.999995	245	1	-0.084146	0.92148	0.92222	0.999995	600	0	-0.084146
Fos	10	0.41129	0.5529	0.999995	246	2	-0.0057184	0.91476	0.91394	0.999995	594	0	-0.0057184
Cbx7	9	0.41276	0.55011	0.999995	247	2	0.10551	0.092629	0.11011	0.999995	66	1	0.10551
Eed	10	0.41518	0.55645	0.999995	248	2	-0.1616	0.84244	0.8415	0.999995	544	0	-0.1616
Kat7	6	0.41847	0.46475	0.999995	249	1	-0.43642	0.80195	0.80082	0.999995	514	0	-0.43642
Alkbh3	10	0.42003	0.56077	0.999995	250	2	0.095557	0.62034	0.61894	0.999995	386	0	0.095557
Smarcd3	11	0.42682	0.57632	0.999995	251	1	0.055841	0.58259	0.5823	0.999995	366	0	0.055841
H2-Bl	6	0.42872	0.47145	0.999995	252	1	-0.047812	0.98603	0.98585	0.999995	665	0	-0.047812
Hdgfl1	10	0.43498	0.57403	0.999995	253	2	0.13295	0.5506	0.54918	0.999995	350	0	0.13295
Senp3	11	0.44223	0.5893	0.999995	254	2	0.06791	0.91854	0.91826	0.999995	598	0	0.06791
Btla	10	0.44456	0.58258	0.999995	255	2	-0.077734	0.20312	0.20755	0.999995	123	1	-0.077734
H2-Aa	10	0.44551	0.58329	0.999995	256	2	0.14332	0.26969	0.26784	0.999995	167	1	0.14332
Stat2	11	0.44742	0.59357	0.999995	257	2	-0.13629	0.15669	0.1737	0.999995	99	1	-0.13629
Caprin2	10	0.45312	0.59069	0.999995	258	2	-0.08161	0.70893	0.70767	0.999995	452	0	-0.08161
Ing1	11	0.45517	0.60027	0.999995	259	1	-0.049707	0.45108	0.45242	0.999995	286	0	-0.049707
Kdm4c	11	0.45842	0.60284	0.999995	260	1	0.16175	0.39535	0.39544	0.999995	257	0	0.16175
L3mbtl4	6	0.46086	0.49345	0.999995	261	1	-0.15896	0.061284	0.069464	0.999995	51	1	-0.15896
Setmar	11	0.46186	0.60597	0.999995	262	2	-0.055424	0.13462	0.15549	0.999995	84	1	-0.055424
Smyd5	10	0.46295	0.59941	0.999995	263	1	-0.243	0.93428	0.93366	0.999995	609	0	-0.243
Kdm4a	10	0.46445	0.60086	0.999995	264	2	-0.085157	0.4846	0.48238	0.999995	308	0	-0.085157
Nat6	10	0.46586	0.60229	0.999995	265	2	-0.083503	0.96788	0.967	0.999995	641	0	-0.083503
Kdm1b	11	0.47258	0.61468	0.999995	266	2	-0.0013253	0.44944	0.45054	0.999995	284	0	-0.0013253
Prdm14	11	0.47756	0.61937	0.999995	267	1	0.13986	0.29847	0.30007	0.999995	186	1	0.13986
Gm8909	11	0.48421	0.62484	0.999995	268	2	0.29037	0.0545	0.093787	0.999995	48	1	0.29037
Pmp22	10	0.48635	0.62161	0.999995	269	2	-0.021092	0.63044	0.62857	0.999995	393	0	-0.021092
Il6	9	0.4882	0.60053	0.999995	270	1	0.085957	0.3261	0.32725	0.999995	203	0	0.085957
Hdgfrp3	10	0.49049	0.62593	0.999995	271	2	0.08163	0.83548	0.83451	0.999995	538	0	0.08163
Chrac1	9	0.49202	0.60225	0.999995	272	1	-0.31833	0.40993	0.4104	0.999995	263	0	-0.31833
Mael	11	0.49227	0.63178	0.999995	273	1	0.14845	0.074478	0.10849	0.999995	61	1	0.14845
Kdm5c	11	0.49522	0.63409	0.999995	274	2	0.085945	0.3187	0.31959	0.999995	198	1	0.085945
Ezh2	11	0.51152	0.64827	0.999995	275	2	-0.032773	0.26495	0.26783	0.999995	164	1	-0.032773
Cbx2	8	0.51187	0.5818	0.999995	276	1	-0.20589	0.95532	0.95512	0.999995	625	0	-0.20589
Jmjd1c	11	0.5125	0.64911	0.999995	277	2	-0.073732	0.37257	0.37287	0.999995	246	0	-0.073732
Arnt	11	0.51396	0.65043	0.999995	278	2	0.019944	0.86311	0.86298	0.999995	561	0	0.019944
G2e3	11	0.51738	0.65368	0.999995	279	2	-0.036441	0.44862	0.44969	0.999995	283	0	-0.036441
Smyd3	11	0.51981	0.65589	0.999995	280	2	-0.12463	0.86288	0.86277	0.999995	559	0	-0.12463
Kalrn	10	0.52161	0.64541	0.999995	281	1	0.11303	0.16565	0.17468	0.999995	102	1	0.11303
Trdmt1	11	0.5232	0.65916	0.999995	282	2	-0.19264	0.8822	0.88262	0.999995	578	0	-0.19264
Ep300	11	0.52417	0.66021	0.999995	283	2	-0.042887	0.23665	0.24189	0.999995	144	1	-0.042887
Rnf40	9	0.52466	0.61752	0.999995	284	1	0.45993	0.23276	0.23472	0.999995	139	1	0.45993
Mina	11	0.52513	0.66096	0.999995	285	2	-0.27152	0.58003	0.57973	0.999995	364	0	-0.27152
Smarcc1	11	0.53346	0.66868	0.999995	286	1	-0.098518	0.050177	0.087622	0.999995	46	2	-0.098518
Hif1a	11	0.53909	0.67341	0.999995	287	1	0.088304	0.010563	0.023686	0.886871	19	1	0.088304
Phf13	11	0.54044	0.67478	0.999995	288	2	-0.019157	0.97299	0.97295	0.999995	651	0	-0.019157
Prdm1	11	0.54139	0.67573	0.999995	289	2	0.16431	0.34518	0.34583	0.999995	217	0	0.16431
Prmt3	10	0.54334	0.65396	0.999995	290	1	0.18814	0.83497	0.83411	0.999995	537	0	0.18814
Il13	10	0.55806	0.66018	0.999995	291	1	0.093178	0.24609	0.24602	0.999995	154	1	0.093178
Cxcl10	10	0.56419	0.66318	0.999995	292	1	-0.11225	0.93087	0.93035	0.999995	608	0	-0.11225
Pcgf5	8	0.57355	0.61747	0.999995	293	1	0.044813	0.42436	0.42431	0.999995	267	0	0.044813
Phf7	8	0.5755	0.61869	0.999995	294	1	-0.16676	0.97136	0.97178	0.999995	647	0	-0.16676
Smarcal1	10	0.57563	0.66789	0.999995	295	1	0.050361	0.78788	0.78631	0.999995	501	0	0.050361
H2-Ob	10	0.57681	0.66837	0.999995	296	1	0.063136	0.35588	0.35413	0.999995	226	0	0.063136
Tdrd3	10	0.58154	0.67032	0.999995	297	1	-0.078783	0.92243	0.92171	0.999995	602	0	-0.078783
Chd7	11	0.58323	0.69851	0.999995	298	1	0.18861	0.042097	0.074273	0.999995	39	2	0.18861
Cxcr4	11	0.58387	0.69874	0.999995	299	1	-0.15663	0.85525	0.85543	0.999995	554	0	-0.15663
Suv420h1	6	0.58932	0.59211	0.999995	300	1	0.3575	0.15255	0.15334	0.999995	96	1	0.3575
Nf2	11	0.58957	0.70069	0.999995	301	1	2.3503	1.2042e-20	4.9479e-06	0.0006	1	10	2.3503
Fbxo11	10	0.59599	0.67663	0.999995	302	1	0.16225	0.4092	0.40701	0.999995	262	0	0.16225
Hmg20b	11	0.59645	0.70341	0.999995	303	1	0.2695	0.25527	0.25897	0.999995	159	1	0.2695
Chd1	10	0.6111	0.68325	0.999995	304	1	0.044655	0.15465	0.16536	0.999995	98	1	0.044655
Wt1	10	0.61438	0.68482	0.999995	305	1	0.11106	0.19997	0.20463	0.999995	120	1	0.11106
Gzmn	9	0.61813	0.66578	0.999995	306	1	0.069848	0.64757	0.64863	0.999995	407	0	0.069848
Kat2b	11	0.62175	0.71367	0.999995	307	1	0.0022793	0.76563	0.76514	0.999995	485	0	0.0022793
Prmt10	10	0.62728	0.69104	0.999995	308	1	-0.21339	0.32853	0.32679	0.999995	204	0	-0.21339
Ncoa3	10	0.62887	0.69167	0.999995	309	1	0.064677	0.67415	0.67313	0.999995	422	0	0.064677
Brd3	11	0.62928	0.71689	0.999995	310	1	0.099637	0.84283	0.84266	0.999995	545	0	0.099637
Kdm5b	11	0.63214	0.71808	0.999995	311	1	0.15465	0.30764	0.30856	0.999995	188	1	0.15465
Aurkc	8	0.63218	0.65561	0.999995	312	1	0.29845	0.62264	0.62366	0.999995	388	0	0.29845
Dnmt3a	11	0.63271	0.71836	0.999995	313	1	-0.13203	0.45599	0.45716	0.999995	290	0	-0.13203
Brwd1	9	0.63642	0.67711	0.999995	314	1	0.096967	0.5571	0.55811	0.999995	354	0	0.096967
Tdrd6	11	0.63696	0.72	0.999995	315	1	0.098144	0.68924	0.68893	0.999995	432	0	0.098144
Dpep3	9	0.63971	0.67913	0.999995	316	1	-0.13	0.8644	0.86387	0.999995	563	0	-0.13
Tcf7l1	10	0.64081	0.69789	0.999995	317	1	0.0068396	0.11167	0.13084	0.999995	74	1	0.0068396
Hdac10	11	0.64255	0.72241	0.999995	318	1	0.00082038	0.73983	0.73969	0.999995	475	0	0.00082038
Ppargc1a	9	0.64849	0.68427	0.999995	319	1	0.1412	0.44243	0.44298	0.999995	276	0	0.1412
Smad4	9	0.64986	0.68509	0.999995	320	1	0.26355	0.3179	0.31893	0.999995	197	0	0.26355
Jade3	6	0.65026	0.64786	0.999995	321	1	0.40864	0.26482	0.26492	0.999995	163	0	0.40864
Nap1l5	10	0.65042	0.70238	0.999995	322	1	0.18639	0.74676	0.74582	0.999995	477	0	0.18639
Epc2	8	0.65064	0.66848	0.999995	323	1	-0.24715	0.2338	0.23263	0.999995	141	1	-0.24715
Mbd1	10	0.65341	0.70383	0.999995	324	1	0.036187	0.53856	0.53722	0.999995	339	0	0.036187
Traf7	6	0.6541	0.6518	0.999995	325	1	0.11193	0.60203	0.59983	0.999995	372	0	0.11193
Gm10094	6	0.65442	0.65223	0.999995	326	1	-0.29778	0.89773	0.89794	0.999995	586	0	-0.29778
Tada2a	9	0.65574	0.68891	0.999995	327	1	-0.18911	0.61665	0.61718	0.999995	382	0	-0.18911
Tnfrsf9	11	0.65646	0.72795	0.999995	328	1	0.070948	0.89435	0.89437	0.999995	582	0	0.070948
Jade1	6	0.65664	0.65439	0.999995	329	0	0.10802	0.67732	0.67522	0.999995	427	0	0.10802
Kdm6b	11	0.65806	0.72864	0.999995	330	1	-0.060198	0.66807	0.66725	0.999995	420	0	-0.060198
Prmt7	9	0.65975	0.69133	0.999995	331	1	-0.0046159	0.86223	0.8617	0.999995	558	0	-0.0046159
Paxip1	9	0.66108	0.69206	0.999995	332	1	0.5081	0.1534	0.16272	0.999995	97	1	0.5081
Pml	11	0.66858	0.73363	0.999995	333	1	-0.080448	0.47204	0.47237	0.999995	302	0	-0.080448
Kdm3a	11	0.67168	0.73502	0.999995	334	1	0.038891	0.20278	0.21198	0.999995	122	1	0.038891
Phf11b	5	0.67544	0.67426	0.999995	335	0	-0.28243	0.49043	0.48929	0.999995	312	0	-0.28243
Mta1	10	0.67555	0.71629	0.999995	336	1	0.10656	0.79633	0.79535	0.999995	510	0	0.10656
Tyw5	6	0.67612	0.67399	0.999995	337	0	0.022765	0.92286	0.9236	0.999995	603	0	0.022765
Nf1	10	0.67741	0.71727	0.999995	338	1	0.044305	0.48389	0.48158	0.999995	307	0	0.044305
H2-DMb2	10	0.68794	0.7232	0.999995	339	1	-0.090705	0.71894	0.71795	0.999995	458	0	-0.090705
Prdm5	9	0.68961	0.7112	0.999995	340	1	0.010474	0.43689	0.43766	0.999995	273	0	0.010474
Btg3	7	0.68966	0.69228	0.999995	341	1	0.078974	0.86543	0.86594	0.999995	565	0	0.078974
Hdac8	8	0.68997	0.69865	0.999995	342	1	0.087204	0.87981	0.87929	0.999995	577	0	0.087204
Rel	9	0.69124	0.71236	0.999995	343	1	-0.19913	0.96081	0.96044	0.999995	631	0	-0.19913
H2-DMa	6	0.69149	0.68904	0.999995	344	0	0.14146	0.07294	0.079933	0.999995	59	1	0.14146
Map2k1	9	0.69246	0.71318	0.999995	345	1	-0.023373	0.3681	0.36847	0.999995	240	0	-0.023373
Cbx3	6	0.69895	0.6967	0.999995	346	0	0.5853	0.12874	0.13079	0.999995	82	1	0.5853
Asf1a	8	0.70052	0.70708	0.999995	347	1	0.077762	0.38381	0.38409	0.999995	254	0	0.077762
Brd7	9	0.70207	0.72002	0.999995	348	1	-0.22852	0.90735	0.90762	0.999995	590	0	-0.22852
Il2	9	0.71025	0.72562	0.999995	349	1	0.21086	0.52823	0.5295	0.999995	332	0	0.21086
Nap1l4	10	0.71188	0.73736	0.999995	350	1	0.33311	0.33835	0.33653	0.999995	210	0	0.33311
Tcf3	11	0.7151	0.75687	0.999995	351	1	0.10056	0.61645	0.61624	0.999995	381	0	0.10056
Prdm6	11	0.7169	0.75778	0.999995	352	1	0.1661	0.62175	0.62129	0.999995	387	0	0.1661
Hmgn5	9	0.72086	0.73329	0.999995	353	1	0.11005	0.35489	0.35562	0.999995	224	0	0.11005
Setd1b	6	0.72519	0.72388	0.999995	354	0	-0.094889	0.43017	0.42817	0.999995	268	0	-0.094889
Cbx5	8	0.72604	0.72845	0.999995	355	1	0.14092	0.31089	0.3105	0.999995	193	0	0.14092
Pcgf6	11	0.7275	0.7635	0.999995	356	1	-0.16999	0.49986	0.49996	0.999995	316	0	-0.16999
Setdb2	11	0.72794	0.76368	0.999995	357	1	-0.28487	0.27558	0.2778	0.999995	173	1	-0.28487
Myb	10	0.72824	0.74816	0.999995	358	1	-0.14779	0.84317	0.84225	0.999995	546	0	-0.14779
Alkbh2	9	0.73183	0.74111	0.999995	359	1	0.11596	0.92813	0.92842	0.999995	606	0	0.11596
Lag3	10	0.73803	0.75475	0.999995	360	1	-0.12545	0.9389	0.93839	0.999995	612	0	-0.12545
Setd3	9	0.73893	0.74654	0.999995	361	1	-0.012062	0.65122	0.65229	0.999995	409	0	-0.012062
Kdm4d	11	0.74149	0.77105	0.999995	362	1	-0.020737	0.24217	0.24693	0.999995	152	1	-0.020737
Mecp2	11	0.74231	0.77153	0.999995	363	1	0.114	0.17707	0.19058	0.999995	106	1	0.114
Ptger3	10	0.74338	0.75835	0.999995	364	1	0.12959	0.442	0.43926	0.999995	275	0	0.12959
Adora3	6	0.74384	0.74269	0.999995	365	0	0.040224	0.91799	0.91847	0.999995	597	0	0.040224
Tdrd7	10	0.74413	0.75893	0.999995	366	1	0.019422	0.46221	0.45992	0.999995	295	0	0.019422
Rela	11	0.74519	0.77305	0.999995	367	1	-0.29932	0.2108	0.21875	0.999995	128	1	-0.29932
Mllt6	10	0.74714	0.76077	0.999995	368	1	-0.066401	0.50067	0.49882	0.999995	317	0	-0.066401
Chd6	11	0.74884	0.77522	0.999995	369	1	0.074914	0.62291	0.62245	0.999995	389	0	0.074914
Smarcad1	10	0.75213	0.76393	0.999995	370	1	0.28124	0.36534	0.36338	0.999995	235	0	0.28124
Trerf1	6	0.75216	0.75077	0.999995	371	0	0.15919	0.70234	0.70037	0.999995	443	0	0.15919
Slc25a15	11	0.756	0.77928	0.999995	372	1	-0.28965	0.39892	0.3992	0.999995	259	0	-0.28965
L3mbtl3	10	0.75847	0.76806	0.999995	373	1	0.076039	0.808	0.8068	0.999995	520	0	0.076039
Mllt3	6	0.76073	0.75969	0.999995	374	0	0.19179	0.55667	0.55366	0.999995	353	0	0.19179
Chd3	11	0.76373	0.78399	0.999995	375	1	0.011483	0.95077	0.95049	0.999995	619	0	0.011483
H2-T23	10	0.76379	0.7721	0.999995	376	1	0.0054507	0.7778	0.77621	0.999995	494	0	0.0054507
Scmh1	10	0.76414	0.77235	0.999995	377	1	0.21566	0.18511	0.19176	0.999995	110	1	0.21566
Ing2	11	0.76827	0.78666	0.999995	378	1	0.045449	0.89417	0.89416	0.999995	581	0	0.045449
Hells	11	0.76939	0.78734	0.999995	379	1	0.34882	0.051226	0.089156	0.999995	47	2	0.34882
Nap1l1	8	0.77	0.77006	0.999995	380	0	0.094361	0.19208	0.19252	0.999995	115	1	0.094361
Ing5	11	0.77013	0.78787	0.999995	381	1	0.052764	0.91897	0.91856	0.999995	599	0	0.052764
Hdac1	8	0.77029	0.77029	0.999995	382	0	-0.32662	0.7118	0.71319	0.999995	454	0	-0.32662
Prkab1	9	0.77044	0.77244	0.999995	383	1	0.20407	0.73858	0.73968	0.999995	471	0	0.20407
Cbx6	10	0.77191	0.77854	0.999995	384	1	0.054071	0.87835	0.87801	0.999995	576	0	0.054071
Nt5e	10	0.77276	0.7792	0.999995	385	1	0.1269	0.84122	0.84016	0.999995	541	0	0.1269
Prdm2	10	0.77445	0.78045	0.999995	386	1	-0.065317	0.76866	0.76742	0.999995	487	0	-0.065317
Brdt	11	0.77638	0.79213	0.999995	387	1	-0.12254	0.26602	0.2688	0.999995	165	1	-0.12254
Aanat	8	0.78304	0.78338	0.999995	388	0	0.12973	0.85068	0.85018	0.999995	551	0	0.12973
Tcf19	11	0.78352	0.79652	0.999995	389	1	0.11483	0.23333	0.23886	0.999995	140	1	0.11483
Smad7	10	0.78371	0.78734	0.999995	390	1	0.017515	0.18938	0.19556	0.999995	112	1	0.017515
Snd1	11	0.78388	0.79677	0.999995	391	1	0.18224	0.46807	0.46877	0.999995	300	0	0.18224
Entpd1	10	0.78435	0.78782	0.999995	392	1	-0.016602	0.22487	0.22652	0.999995	135	1	-0.016602
Cbx8	10	0.785	0.7884	0.999995	393	1	0.23053	0.17759	0.18484	0.999995	107	1	0.23053
Atad2	10	0.78596	0.78908	0.999995	394	1	-0.18026	0.64438	0.64202	0.999995	405	0	-0.18026
Bahcc1	11	0.78702	0.79895	0.999995	395	1	-0.14408	0.61704	0.61682	0.999995	383	0	-0.14408
H2-Ab1	10	0.78757	0.7903	0.999995	396	1	-0.084058	0.94654	0.94582	0.999995	615	0	-0.084058
Hmgn3	8	0.78759	0.78802	0.999995	397	0	-0.19157	0.53183	0.53109	0.999995	335	0	-0.19157
H2-Q10	8	0.78812	0.78851	0.999995	398	0	-0.23487	0.66985	0.67056	0.999995	421	0	-0.23487
Prdm4	10	0.7882	0.79084	0.999995	399	1	0.20444	0.60944	0.60777	0.999995	375	0	0.20444
Hspbap1	10	0.78947	0.79188	0.999995	400	1	0.35196	0.0090263	0.019618	0.792366	18	2	0.35196
Padi4	10	0.7901	0.79248	0.999995	401	1	0.11107	0.61329	0.6115	0.999995	378	0	0.11107
Stat4	9	0.79058	0.79096	0.999995	402	1	-0.18219	0.16234	0.17068	0.999995	100	1	-0.18219
Mysm1	11	0.79318	0.80325	0.999995	403	1	-0.18083	0.23555	0.24095	0.999995	142	1	-0.18083
Tdrd5	10	0.79324	0.79537	0.999995	404	1	-0.019052	0.63566	0.63407	0.999995	398	0	-0.019052
Brpf3	9	0.79487	0.79503	0.999995	405	1	-0.10365	0.32283	0.32389	0.999995	200	0	-0.10365
Sfmbt2	9	0.79543	0.79568	0.999995	406	1	0.014353	0.84415	0.84407	0.999995	547	0	0.014353
Irf4	10	0.79633	0.79819	0.999995	407	1	0.033222	0.70251	0.70118	0.999995	444	0	0.033222
Mbd2	11	0.79687	0.80613	0.999995	408	1	-0.088363	0.20966	0.21777	0.999995	126	1	-0.088363
H2-Q6	10	0.79725	0.79894	0.999995	409	1	0.049523	0.042557	0.074283	0.999995	42	2	0.049523
Mier3	9	0.80019	0.80064	0.999995	410	0	0.19247	0.64343	0.64473	0.999995	404	0	0.19247
Epc1	9	0.80074	0.80122	0.999995	411	0	0.22774	0.32854	0.32959	0.999995	205	0	0.22774
Arid2	10	0.8012	0.80229	0.999995	412	1	0.12887	0.20207	0.20653	0.999995	121	1	0.12887
Sfmbt1	11	0.80179	0.80982	0.999995	413	1	0.024203	0.11456	0.13923	0.999995	76	1	0.024203
Mbd6	11	0.80244	0.81041	0.999995	414	1	-0.12353	0.64504	0.64414	0.999995	406	0	-0.12353
Prdm12	8	0.8025	0.80247	0.999995	415	0	-0.025708	0.2289	0.22797	0.999995	137	1	-0.025708
Smad6	11	0.80277	0.81072	0.999995	416	1	0.042824	0.63555	0.63478	0.999995	397	0	0.042824
Hdgfrp2	10	0.80299	0.80364	0.999995	417	1	-0.20319	0.77713	0.7756	0.999995	493	0	-0.20319
Cd40lg	9	0.80565	0.80633	0.999995	418	0	0.040767	0.58914	0.58978	0.999995	368	0	0.040767
Kmt2c	6	0.8069	0.80569	0.999995	419	0	-0.17624	0.78942	0.78831	0.999995	502	0	-0.17624
Smyd2	10	0.80713	0.80711	0.999995	420	1	0.099797	0.3772	0.37551	0.999995	251	0	0.099797
Stat5b	10	0.808	0.80801	0.999995	421	1	-0.017507	0.72624	0.72548	0.999995	462	0	-0.017507
Cd40	9	0.80807	0.80862	0.999995	422	0	0.13297	0.87462	0.87423	0.999995	572	0	0.13297
Ednrb	11	0.80851	0.81512	0.999995	423	1	-0.10659	0.75482	0.75431	0.999995	482	0	-0.10659
Pcgf2	10	0.80916	0.80911	0.999995	424	1	-0.095018	0.90987	0.90904	0.999995	593	0	-0.095018
Psmb8	10	0.81375	0.81331	0.999995	425	1	-0.24136	0.98845	0.98811	0.999995	668	0	-0.24136
Pcgf1	11	0.81624	0.8207	0.999995	426	1	0.76875	0.045062	0.079092	0.999995	43	2	0.76875
Lrp6	11	0.81685	0.82123	0.999995	427	1	0.10964	0.80244	0.80267	0.999995	515	0	0.10964
Cd28	11	0.81715	0.82146	0.999995	428	1	0.099798	0.66703	0.66623	0.999995	419	0	0.099798
Pax5	10	0.8174	0.81669	0.999995	429	1	0.089003	0.84171	0.8407	0.999995	543	0	0.089003
Nat8	10	0.81796	0.81721	0.999995	430	1	0.16846	0.26092	0.25968	0.999995	162	1	0.16846
Cdyl2	9	0.81823	0.81837	0.999995	431	0	-0.077814	0.92164	0.9218	0.999995	601	0	-0.077814
Zcwpw1	11	0.82104	0.82468	0.999995	432	1	0.10312	0.65269	0.65154	0.999995	410	0	0.10312
Nfe2l2	9	0.82126	0.8213	0.999995	433	0	0.1333	0.80592	0.80662	0.999995	518	0	0.1333
Ccl2	10	0.82478	0.82404	0.999995	434	1	0.086587	0.007852	0.01755	0.750529	17	2	0.086587
Hat1	10	0.82559	0.82503	0.999995	435	1	-0.022422	0.7051	0.70382	0.999995	447	0	-0.022422
Pbrm1	9	0.82792	0.82793	0.999995	436	0	-0.15532	0.42355	0.42419	0.999995	266	0	-0.15532
Rcor2	11	0.82972	0.83188	0.999995	437	1	0.20274	0.37442	0.37478	0.999995	249	0	0.20274
Nhs	11	0.83029	0.83239	0.999995	438	1	-0.17303	0.36792	0.36842	0.999995	239	0	-0.17303
Shprh	10	0.83086	0.83018	0.999995	439	1	0.14644	0.53469	0.53328	0.999995	336	0	0.14644
Jade2	6	0.83103	0.8297	0.999995	440	0	-0.05622	0.34132	0.34006	0.999995	214	0	-0.05622
Nap1l3	10	0.83189	0.83128	0.999995	441	0	-0.24477	0.32402	0.32228	0.999995	201	0	-0.24477
Dpf1	10	0.83267	0.83194	0.999995	442	0	0.0098291	0.98172	0.98134	0.999995	660	0	0.0098291
Chmp1b	6	0.83295	0.83176	0.999995	443	0	0.096656	0.58229	0.57997	0.999995	365	0	0.096656
H2-M3	9	0.83364	0.83327	0.999995	444	0	0.12412	0.4882	0.48943	0.999995	309	0	0.12412
Satb1	10	0.83421	0.83338	0.999995	445	0	-0.12859	0.14799	0.15985	0.999995	92	1	-0.12859
Phf21b	10	0.83548	0.83451	0.999995	446	0	-0.14168	0.56174	0.56025	0.999995	356	0	-0.14168
Setd4	11	0.83557	0.83665	0.999995	447	1	-0.032582	0.98865	0.98902	0.999995	669	0	-0.032582
Ccl12	7	0.83567	0.83659	0.999995	448	0	-0.15241	0.33781	0.33696	0.999995	209	0	-0.15241
Icos	8	0.83626	0.83596	0.999995	449	0	0.20073	0.71387	0.71517	0.999995	456	0	0.20073
Mybl1	11	0.83748	0.83843	0.999995	450	1	0.042141	0.3167	0.31767	0.999995	194	1	0.042141
Ido1	10	0.83849	0.83783	0.999995	451	0	-0.03312	0.85467	0.85344	0.999995	553	0	-0.03312
Gm6251	6	0.84012	0.83883	0.999995	452	0	-0.024232	0.85054	0.84981	0.999995	550	0	-0.024232
Snai1	11	0.84151	0.84197	0.999995	453	1	0.19495	0.0021207	0.0064471	0.390588	12	1	0.19495
Trim28	9	0.84304	0.84302	0.999995	454	0	0.064651	0.30795	0.30887	0.999995	189	0	0.064651
Psmb9	11	0.84414	0.84455	0.999995	455	1	-0.045191	0.45436	0.45569	0.999995	287	0	-0.045191
Smarcc2	11	0.84544	0.84588	0.999995	456	1	0.12904	0.37164	0.37194	0.999995	244	0	0.12904
Angpt2	10	0.84606	0.84527	0.999995	457	0	-0.078408	0.44806	0.44538	0.999995	282	0	-0.078408
4632428N05Rik	11	0.84621	0.84656	0.999995	458	1	-0.054699	0.83197	0.83179	0.999995	536	0	-0.054699
Mum1	10	0.84654	0.84582	0.999995	459	0	0.16443	0.61493	0.61344	0.999995	379	0	0.16443
Nptxr	11	0.84699	0.84731	0.999995	460	1	0.10345	0.19118	0.20273	0.999995	114	1	0.10345
Tapbp	11	0.84775	0.84807	0.999995	461	1	0.10937	0.40777	0.40842	0.999995	261	0	0.10937
Dscam	11	0.84979	0.84995	0.999995	462	1	0.054592	0.29538	0.29712	0.999995	183	1	0.054592
Rab33b	10	0.851	0.84975	0.999995	463	0	0.16613	0.057018	0.088622	0.999995	49	1	0.16613
Ado	10	0.85602	0.8548	0.999995	464	0	0.0057277	0.99412	0.99382	0.999995	674	0	0.0057277
Jak3	11	0.85815	0.8582	0.999995	465	1	0.041647	0.58705	0.58683	0.999995	367	0	0.041647
Phf19	11	0.85863	0.85853	0.999995	466	1	-0.21993	0.46407	0.46501	0.999995	296	0	-0.21993
B2m	10	0.85892	0.85791	0.999995	467	0	0.058628	0.33746	0.33572	0.999995	208	0	0.058628
Tsc1	10	0.85958	0.85857	0.999995	468	0	0.25012	0.072762	0.1001	0.999995	58	1	0.25012
Il4	9	0.86002	0.85932	0.999995	469	0	-0.023997	0.80457	0.80516	0.999995	517	0	-0.023997
Phf11a	6	0.86144	0.86079	0.999995	470	0	0.077581	0.5088	0.50643	0.999995	323	0	0.077581
Cd86	10	0.86177	0.86085	0.999995	471	0	0.10027	0.63876	0.63709	0.999995	400	0	0.10027
Gm7030	9	0.86183	0.86124	0.999995	472	0	0.064597	0.69327	0.69482	0.999995	435	0	0.064597
Pygo1	11	0.8638	0.86365	0.999995	473	0	-0.039853	0.561	0.56116	0.999995	355	0	-0.039853
Hdac6	11	0.86449	0.86437	0.999995	474	0	0.11849	0.36042	0.36108	0.999995	231	0	0.11849
Phf11c	6	0.86512	0.86431	0.999995	475	0	-0.056068	0.6623	0.66008	0.999995	417	0	-0.056068
Kir3dl1	10	0.86625	0.8652	0.999995	476	0	-0.060439	0.40518	0.40348	0.999995	260	0	-0.060439
Phf10	10	0.86667	0.8655	0.999995	477	0	-0.11931	0.62939	0.62768	0.999995	392	0	-0.11931
Pygo2	10	0.86709	0.86601	0.999995	478	0	0.15195	0.37383	0.37203	0.999995	248	0	0.15195
Dpep1	11	0.86835	0.86823	0.999995	479	0	-0.016309	0.77236	0.77205	0.999995	489	0	-0.016309
Psmb10	10	0.86855	0.86749	0.999995	480	0	0.064333	0.47675	0.47453	0.999995	303	0	0.064333
Smc1b	11	0.8688	0.8688	0.999995	481	0	0.18549	0.54118	0.54187	0.999995	343	0	0.18549
Arid1a	11	0.87013	0.87011	0.999995	482	0	-0.15593	0.34132	0.34172	0.999995	213	0	-0.15593
Ehmt2	10	0.87019	0.86943	0.999995	483	0	0.19856	0.79355	0.79242	0.999995	507	0	0.19856
Hif1an	11	0.87189	0.8723	0.999995	484	0	-0.16099	0.73181	0.73162	0.999995	466	0	-0.16099
Prkaa2	10	0.87203	0.87141	0.999995	485	0	0.21657	0.69464	0.69344	0.999995	437	0	0.21657
Vegfb	9	0.87278	0.87244	0.999995	486	0	0.14984	0.81975	0.81986	0.999995	528	0	0.14984
Hif3a	10	0.87323	0.87285	0.999995	487	0	0.0077689	0.36192	0.36017	0.999995	232	0	0.0077689
Prmt2	10	0.87363	0.87324	0.999995	488	0	0.046299	0.92571	0.92514	0.999995	605	0	0.046299
Mapk1	9	0.87426	0.87393	0.999995	489	0	-0.095073	0.85921	0.8586	0.999995	557	0	-0.095073
Tcf20	11	0.87471	0.87497	0.999995	490	0	-0.077983	0.29022	0.29205	0.999995	180	1	-0.077983
H2-Eb1	10	0.8768	0.87636	0.999995	491	0	-0.11498	0.97969	0.97913	0.999995	655	0	-0.11498
Mmp9	11	0.87788	0.87831	0.999995	492	0	-0.089745	0.28189	0.28361	0.999995	177	1	-0.089745
Prdm13	11	0.88016	0.88063	0.999995	493	0	0.054056	0.36979	0.37029	0.999995	242	0	0.054056
Mr1	10	0.88103	0.88066	0.999995	494	0	0.10153	0.77512	0.77383	0.999995	490	0	0.10153
Hdac4	11	0.882	0.88239	0.999995	495	0	-0.11572	0.82859	0.82849	0.999995	532	0	-0.11572
Tdo2	10	0.88235	0.88203	0.999995	496	0	-0.05391	0.71812	0.71713	0.999995	457	0	-0.05391
Hmga1	6	0.88256	0.88222	0.999995	497	0	0.10547	0.46086	0.45904	0.999995	292	0	0.10547
Eng	10	0.88531	0.88506	0.999995	498	0	0.0033856	0.88347	0.88314	0.999995	579	0	0.0033856
Rnase12	9	0.88585	0.88623	0.999995	499	0	-0.055038	0.3541	0.3548	0.999995	222	0	-0.055038
H2-D1	9	0.88619	0.88662	0.999995	500	0	-0.10664	0.95962	0.95924	0.999995	629	0	-0.10664
Pdcd1	11	0.88678	0.88697	0.999995	501	0	0.19451	0.54879	0.54947	0.999995	348	0	0.19451
Prkab2	10	0.88731	0.88716	0.999995	502	0	-0.19476	0.52227	0.52061	0.999995	330	0	-0.19476
Scml2	8	0.88779	0.88756	0.999995	503	0	0.022038	0.96267	0.96268	0.999995	633	0	0.022038
Map2k2	10	0.88875	0.88866	0.999995	504	0	0.079948	0.22896	0.23029	0.999995	138	1	0.079948
Icosl	11	0.8891	0.88919	0.999995	505	0	0.084058	0.52201	0.52264	0.999995	329	0	0.084058
Smarca2	6	0.88963	0.88951	0.999995	506	0	0.27343	0.20558	0.20563	0.999995	125	0	0.27343
Kdm1a	11	0.88967	0.8898	0.999995	507	0	0.51247	0.16514	0.18051	0.999995	101	1	0.51247
Trim24	11	0.89157	0.8917	0.999995	508	0	-0.19816	0.96794	0.96761	0.999995	642	0	-0.19816
Baz2b	10	0.89347	0.89329	0.999995	509	0	-0.15595	0.80388	0.80276	0.999995	516	0	-0.15595
Socs6	10	0.89364	0.8935	0.999995	510	0	0.43687	0.033508	0.059726	0.999995	30	2	0.43687
Ccl5	9	0.89431	0.89461	0.999995	511	0	-0.093845	0.46674	0.46706	0.999995	299	0	-0.093845
Ptprc	6	0.89458	0.89454	0.999995	512	0	-0.089051	0.7791	0.7777	0.999995	495	0	-0.089051
Taf6l	9	0.89524	0.89566	0.999995	513	0	0.81866	0.020081	0.036501	0.999995	24	2	0.81866
H2-K1	11	0.89526	0.89523	0.999995	514	0	0.074932	0.81318	0.81325	0.999995	524	0	0.074932
Tnfsf9	11	0.89563	0.89563	0.999995	515	0	-0.02247	0.44532	0.44607	0.999995	280	0	-0.02247
Prdm16	11	0.89671	0.89661	0.999995	516	0	0.092071	0.84647	0.84646	0.999995	549	0	0.092071
Nkx2-1	11	0.89707	0.89695	0.999995	517	0	0.04036	0.15183	0.16993	0.999995	95	1	0.04036
Slc26a1	11	0.89778	0.89772	0.999995	518	0	0.26346	0.16634	0.18148	0.999995	103	1	0.26346
Ccl17	9	0.89817	0.89864	0.999995	519	0	0.03295	0.87608	0.87579	0.999995	573	0	0.03295
Phc3	10	0.89916	0.89875	0.999995	520	0	0.063747	0.66077	0.65878	0.999995	415	0	0.063747
Areg	9	0.90132	0.90178	0.999995	521	0	0.27811	0.1906	0.19587	0.999995	113	1	0.27811
Fxyd1	10	0.9019	0.90133	0.999995	522	0	0.094377	0.56722	0.56634	0.999995	361	0	0.094377
Mfge8	11	0.90485	0.90461	0.999995	523	0	-0.018498	0.74964	0.74941	0.999995	480	0	-0.018498
Hyal1	11	0.90518	0.90494	0.999995	524	0	-0.1133	0.070513	0.10557	0.999995	55	1	-0.1133
Tada3	11	0.90535	0.90512	0.999995	525	0	0.18181	0.042422	0.074748	0.999995	41	2	0.18181
Sirt2	11	0.90667	0.90638	0.999995	526	0	0.32905	0.036409	0.065386	0.999995	33	2	0.32905
Hdgf	11	0.90683	0.90654	0.999995	527	0	0.21792	0.60138	0.60094	0.999995	371	0	0.21792
Pdcd1lg2	11	0.90877	0.90831	0.999995	528	0	0.063638	0.78458	0.78415	0.999995	498	0	0.063638
Fto	10	0.90987	0.90904	0.999995	529	0	0.090818	0.30849	0.30653	0.999995	190	0	0.090818
Satl1	11	0.91052	0.91	0.999995	530	0	0.017519	0.67679	0.67638	0.999995	426	0	0.017519
Ereg	9	0.912	0.91222	0.999995	531	0	0.15043	0.64017	0.6415	0.999995	402	0	0.15043
Tnfrsf4	9	0.91332	0.91359	0.999995	532	0	-0.092276	0.89695	0.89734	0.999995	585	0	-0.092276
Sirt7	9	0.91398	0.91413	0.999995	533	0	-0.27697	0.90833	0.90849	0.999995	591	0	-0.27697
Stat5a	9	0.91489	0.91503	0.999995	534	0	-0.087721	0.54171	0.54297	0.999995	344	0	-0.087721
Stat1	11	0.91544	0.91512	0.999995	535	0	-0.17597	0.95525	0.9551	0.999995	624	0	-0.17597
Mgmt	11	0.91663	0.91639	0.999995	536	0	0.039966	0.027418	0.051077	0.999995	27	2	0.039966
Cd4	10	0.91684	0.91612	0.999995	537	0	-0.17617	0.46588	0.46342	0.999995	297	0	-0.17617
Clock	9	0.91707	0.91701	0.999995	538	0	0.081208	0.29533	0.29585	0.999995	182	0	0.081208
Adora2a	11	0.91752	0.91722	0.999995	539	0	0.16017	0.95389	0.95376	0.999995	621	0	0.16017
Hdac5	11	0.91839	0.91805	0.999995	540	0	-0.15393	0.82687	0.82702	0.999995	531	0	-0.15393
Phf2	11	0.9194	0.91896	0.999995	541	0	-0.15137	0.01678	0.033809	0.999995	22	2	-0.15137
Tgfb3	10	0.91994	0.91917	0.999995	542	0	0.20943	0.74863	0.74739	0.999995	479	0	0.20943
Uhrf2	11	0.92026	0.91959	0.999995	543	0	-0.16896	0.78033	0.78008	0.999995	496	0	-0.16896
Kdm7a	6	0.92027	0.921	0.999995	544	0	0.0081108	0.2761	0.27614	0.999995	174	0	0.0081108
Phf20l1	10	0.92087	0.92021	0.999995	545	0	0.1664	0.82478	0.82392	0.999995	529	0	0.1664
Jmjd7	10	0.92255	0.92183	0.999995	546	0	0.16347	0.098868	0.1206	0.999995	69	1	0.16347
Nat14	11	0.92278	0.92204	0.999995	547	0	0.38136	0.26066	0.26393	0.999995	161	1	0.38136
Tinagl1	9	0.92342	0.92359	0.999995	548	0	0.046871	0.36346	0.364	0.999995	233	0	0.046871
Tdrd1	11	0.92509	0.92424	0.999995	549	0	0.11317	0.27452	0.27687	0.999995	171	1	0.11317
Vtcn1	10	0.92546	0.92494	0.999995	550	0	0.10152	0.72744	0.72666	0.999995	463	0	0.10152
Brpf1	11	0.92562	0.9247	0.999995	551	0	0.37441	0.12714	0.14942	0.999995	80	1	0.37441
Mta2	10	0.92785	0.92729	0.999995	552	0	0.50262	0.27163	0.26967	0.999995	168	1	0.50262
Dnmt3l	9	0.92802	0.92827	0.999995	553	0	0.06866	0.55146	0.5528	0.999995	351	0	0.06866
Setd6	11	0.92876	0.92781	0.999995	554	0	-0.16291	0.81071	0.8109	0.999995	521	0	-0.16291
Deaf1	9	0.92901	0.92922	0.999995	555	0	0.052299	0.17901	0.18577	0.999995	108	1	0.052299
Kdm5d	11	0.93153	0.93052	0.999995	556	0	-0.032753	0.34614	0.34669	0.999995	219	0	-0.032753
Setd5	11	0.93202	0.931	0.999995	557	0	0.36728	0.24656	0.25077	0.999995	155	1	0.36728
Cd80	11	0.93264	0.93168	0.999995	558	0	-0.048915	0.32268	0.32359	0.999995	199	1	-0.048915
Cd27	6	0.93278	0.93363	0.999995	559	0	0.062961	0.80014	0.79907	0.999995	512	0	0.062961
Prdm9	11	0.933	0.93202	0.999995	560	0	-0.096331	0.80661	0.80705	0.999995	519	0	-0.096331
Pwwp2a	10	0.93406	0.93342	0.999995	561	0	0.18613	0.25007	0.24968	0.999995	156	1	0.18613
Rsf1	11	0.93468	0.9337	0.999995	562	0	-0.040539	0.70172	0.70143	0.999995	442	0	-0.040539
Mta3	9	0.93475	0.93489	0.999995	563	0	0.12307	0.50083	0.50226	0.999995	318	0	0.12307
Tnfsf4	11	0.93562	0.93459	0.999995	564	0	0.19743	0.036869	0.066119	0.999995	35	1	0.19743
Cdyl	11	0.93574	0.93479	0.999995	565	0	0.21324	0.16754	0.18249	0.999995	104	1	0.21324
Ing4	9	0.93597	0.93599	0.999995	566	0	0.053012	0.89587	0.89626	0.999995	583	0	0.053012
Cd8a	10	0.93603	0.93548	0.999995	567	0	-0.018557	0.68929	0.68829	0.999995	433	0	-0.018557
Lgals9	11	0.93609	0.93519	0.999995	568	0	0.17607	0.81411	0.81416	0.999995	525	0	0.17607
Tsc2	9	0.93697	0.93694	0.999995	569	0	0.50107	0.036545	0.064466	0.999995	34	2	0.50107
Stat3	11	0.93712	0.93622	0.999995	570	0	-0.075533	0.97074	0.9704	0.999995	645	0	-0.075533
Thbs1	9	0.93776	0.93764	0.999995	571	0	0.21624	0.10004	0.1167	0.999995	72	1	0.21624
Tap1	9	0.93786	0.93772	0.999995	572	0	-0.009483	0.14638	0.15669	0.999995	91	1	-0.009483
Havcr2	9	0.93834	0.93818	0.999995	573	0	0.25132	0.67498	0.67616	0.999995	424	0	0.25132
Uty	11	0.93971	0.9392	0.999995	574	0	0.16972	0.017001	0.034136	0.999995	23	2	0.16972
Phf8	10	0.94014	0.93954	0.999995	575	0	0.14094	0.51895	0.51704	0.999995	327	0	0.14094
Cd70	11	0.94025	0.93977	0.999995	576	0	-0.044981	0.9723	0.97218	0.999995	648	0	-0.044981
Ltbr	10	0.94034	0.93979	0.999995	577	0	0.034421	0.19469	0.20006	0.999995	118	1	0.034421
Bmi1	9	0.94111	0.94095	0.999995	578	0	-0.10018	0.37194	0.37219	0.999995	245	0	-0.10018
Nfkb1	11	0.94134	0.9408	0.999995	579	0	0.15875	0.092778	0.12179	0.999995	67	1	0.15875
Arg2	10	0.94145	0.94078	0.999995	580	0	0.038423	0.35675	0.35513	0.999995	228	0	0.038423
L3mbtl1	10	0.94165	0.94091	0.999995	581	0	-0.091503	0.86413	0.86309	0.999995	562	0	-0.091503
Sirt1	11	0.94366	0.94329	0.999995	582	0	0.37238	0.37534	0.37585	0.999995	250	0	0.37238
Arrb1	11	0.94376	0.94342	0.999995	583	0	0.07804	0.61228	0.61182	0.999995	377	0	0.07804
Dpf3	11	0.94407	0.94371	0.999995	584	0	0.24113	0.68972	0.68943	0.999995	434	0	0.24113
Asxl3	9	0.94492	0.94496	0.999995	585	0	0.11923	0.65031	0.65139	0.999995	408	0	0.11923
Prmt8	9	0.94691	0.94683	0.999995	586	0	0.016306	0.079805	0.099586	0.999995	62	1	0.016306
Smyd1	10	0.94746	0.94655	0.999995	587	0	0.0923	0.51292	0.51108	0.999995	325	0	0.0923
Nat8l	9	0.94759	0.9476	0.999995	588	0	0.22085	0.73823	0.73929	0.999995	470	0	0.22085
Sirt4	11	0.94815	0.94765	0.999995	589	0	0.21476	0.34228	0.34279	0.999995	216	0	0.21476
Ehmt1	6	0.94868	0.94958	0.999995	590	0	0.30704	0.43306	0.43124	0.999995	270	0	0.30704
Klrk1	9	0.94917	0.94921	0.999995	591	0	-0.16105	0.70832	0.71014	0.999995	451	0	-0.16105
Jmjd8	9	0.94949	0.94955	0.999995	592	0	0.025621	0.48307	0.48393	0.999995	305	0	0.025621
Dido1	11	0.94994	0.9495	0.999995	593	0	0.2391	0.61881	0.61855	0.999995	384	0	0.2391
Jun	10	0.94999	0.94906	0.999995	594	0	0.13307	0.22385	0.22564	0.999995	134	1	0.13307
Prdm8	11	0.95041	0.95001	0.999995	595	0	0.03096	0.565	0.56525	0.999995	357	0	0.03096
Phf1	10	0.95191	0.95095	0.999995	596	0	0.10883	0.35415	0.35245	0.999995	223	0	0.10883
Rps6ka5	10	0.95224	0.95125	0.999995	597	0	0.24769	0.12088	0.13819	0.999995	77	1	0.24769
Arid4a	11	0.95302	0.95283	0.999995	598	0	-0.04558	0.12338	0.14642	0.999995	79	1	-0.04558
Tnrc18	11	0.9531	0.95291	0.999995	599	0	-0.10976	0.22214	0.22879	0.999995	133	1	-0.10976
Prmt6	11	0.95371	0.95357	0.999995	600	0	-0.027445	0.54811	0.54877	0.999995	346	0	-0.027445
Smchd1	9	0.95373	0.95337	0.999995	601	0	0.1478	0.6196	0.62038	0.999995	385	0	0.1478
Dmtf1	10	0.95396	0.95291	0.999995	602	0	0.19334	0.03731	0.065377	0.999995	36	1	0.19334
Bahd1	11	0.95449	0.95429	0.999995	603	0	0.12988	0.071837	0.10645	0.999995	57	1	0.12988
H2-Q4	9	0.9547	0.9545	0.999995	604	0	-0.091941	0.7056	0.70753	0.999995	449	0	-0.091941
Adora1	11	0.95542	0.95521	0.999995	605	0	0.026293	0.70547	0.70511	0.999995	448	0	0.026293
Flt4	11	0.95575	0.95559	0.999995	606	0	0.11211	0.77638	0.77636	0.999995	491	0	0.11211
Tet1	11	0.95682	0.95677	0.999995	607	0	0.1235	0.13833	0.15868	0.999995	86	1	0.1235
Hdac9	11	0.95747	0.9574	0.999995	608	0	0.08044	0.46085	0.46173	0.999995	291	0	0.08044
Nsd1	10	0.95768	0.95663	0.999995	609	0	0.11739	0.45107	0.44852	0.999995	285	0	0.11739
Rcor3	6	0.95785	0.95836	0.999995	610	0	0.054729	0.68741	0.68509	0.999995	431	0	0.054729
Hdac11	10	0.95813	0.95706	0.999995	611	0	0.042576	0.69509	0.69394	0.999995	438	0	0.042576
Ube2a	11	0.95834	0.95826	0.999995	612	0	0.44928	0.022946	0.043833	0.999995	25	2	0.44928
Mbd3	10	0.95865	0.95752	0.999995	613	0	0.21067	0.18832	0.19451	0.999995	111	1	0.21067
Zfp541	11	0.95981	0.95981	0.999995	614	0	0.26088	0.44449	0.4453	0.999995	279	0	0.26088
Dnmt3b	11	0.96034	0.96019	0.999995	615	0	0.19222	0.049106	0.08595	0.999995	45	1	0.19222
2610002M06Rik	8	0.96107	0.96097	0.999995	616	0	0.30265	0.6309	0.63176	0.999995	394	0	0.30265
Nap1l2	10	0.96121	0.96007	0.999995	617	0	0.12588	0.42111	0.4185	0.999995	265	0	0.12588
Foxp3	10	0.96189	0.96064	0.999995	618	0	0.27834	0.54872	0.54756	0.999995	347	0	0.27834
Arg1	11	0.96247	0.96199	0.999995	619	0	0.056004	0.78943	0.7887	0.999995	503	0	0.056004
Tap2	10	0.96256	0.96127	0.999995	620	0	0.24327	0.37299	0.37104	0.999995	247	0	0.24327
Jak1	11	0.96311	0.96268	0.999995	621	0	0.17275	0.29744	0.29905	0.999995	185	1	0.17275
Csf2	10	0.96336	0.96218	0.999995	622	0	0.23412	0.36363	0.36173	0.999995	234	0	0.23412
Kir3dl2	8	0.96442	0.96441	0.999995	623	0	0.13784	0.49002	0.48965	0.999995	311	0	0.13784
Prdm11	9	0.96484	0.965	0.999995	624	0	0.01376	0.69529	0.69683	0.999995	439	0	0.01376
Ccr4	10	0.96687	0.96597	0.999995	625	0	0.023751	0.67648	0.67525	0.999995	425	0	0.023751
Lrp5	9	0.96779	0.96792	0.999995	626	0	-0.088988	0.77138	0.77161	0.999995	488	0	-0.088988
Smad1	11	0.96843	0.96806	0.999995	627	0	0.21827	0.52129	0.52189	0.999995	328	0	0.21827
Npcd	6	0.96862	0.96907	0.999995	628	0	0.16707	0.69695	0.69461	0.999995	440	0	0.16707
Vegfc	9	0.96924	0.96917	0.999995	629	0	-0.05016	0.70364	0.70572	0.999995	446	0	-0.05016
Kat6a	6	0.96939	0.96969	0.999995	630	0	0.32323	0.50494	0.50249	0.999995	322	0	0.32323
Asz1	9	0.96945	0.9694	0.999995	631	0	0.026593	0.79936	0.79979	0.999995	511	0	0.026593
Whsc1	10	0.97013	0.96932	0.999995	632	0	0.10474	0.63722	0.63559	0.999995	399	0	0.10474
Kdm3b	11	0.97039	0.97013	0.999995	633	0	0.117	0.0034242	0.01001	0.52852	13	3	0.117
H2-Q2	10	0.97147	0.97059	0.999995	634	0	0.076329	0.1491	0.16067	0.999995	93	1	0.076329
Relb	11	0.97153	0.97128	0.999995	635	0	0.063091	0.75204	0.75178	0.999995	481	0	0.063091
H2-Oa	10	0.9723	0.97145	0.999995	636	0	0.13689	0.63928	0.63755	0.999995	401	0	0.13689
Mgea5	9	0.97258	0.97239	0.999995	637	0	0.077453	0.18289	0.18911	0.999995	109	1	0.077453
Phf21a	11	0.97262	0.97252	0.999995	638	0	0.18058	0.35664	0.35724	0.999995	227	0	0.18058
Rnf2	11	0.97315	0.9731	0.999995	639	0	0.2989	0.49379	0.4937	0.999995	313	0	0.2989
Slc38a1	9	0.97323	0.97323	0.999995	640	0	0.060362	0.57583	0.57659	0.999995	363	0	0.060362
Map3k12	11	0.97326	0.97319	0.999995	641	0	0.071951	0.14203	0.16175	0.999995	90	1	0.071951
Baz1a	11	0.97391	0.97392	0.999995	642	0	0.17191	0.43445	0.43518	0.999995	272	0	0.17191
Phrf1	10	0.97512	0.97446	0.999995	643	0	0.13607	0.31766	0.31599	0.999995	195	0	0.13607
Lef1	10	0.97553	0.97481	0.999995	644	0	0.12711	0.81233	0.81109	0.999995	523	0	0.12711
Ptger2	10	0.97612	0.97545	0.999995	645	0	0.11502	0.7318	0.7312	0.999995	465	0	0.11502
Fbxl19	11	0.97658	0.97664	0.999995	646	0	0.4118	0.35189	0.35255	0.999995	220	0	0.4118
Satb2	10	0.97687	0.97628	0.999995	647	0	0.25459	0.7923	0.79109	0.999995	506	0	0.25459
Flt1	10	0.97772	0.97721	0.999995	648	0	0.10487	0.097696	0.11973	0.999995	68	1	0.10487
Atad2b	10	0.97785	0.97733	0.999995	649	0	0.19863	0.54111	0.53946	0.999995	342	0	0.19863
Csf3	9	0.9779	0.97811	0.999995	650	0	0.042505	0.2124	0.21574	0.999995	130	1	0.042505
Il10	9	0.97861	0.97876	0.999995	651	0	0.042793	0.69368	0.69515	0.999995	436	0	0.042793
Jmjd4	9	0.98016	0.98021	0.999995	652	0	-0.049589	0.98576	0.98605	0.999995	663	0	-0.049589
Smarca1	11	0.98076	0.98075	0.999995	653	0	0.24569	0.50211	0.50233	0.999995	319	0	0.24569
Grhl1	10	0.98122	0.98083	0.999995	654	0	0.18028	0.083523	0.10847	0.999995	64	1	0.18028
Setd7	11	0.9813	0.98121	0.999995	655	0	0.16755	0.79046	0.78964	0.999995	505	0	0.16755
Kdr	11	0.98175	0.98179	0.999995	656	0	0.055014	0.62524	0.62474	0.999995	390	0	0.055014
Mllt1	10	0.98179	0.98141	0.999995	657	0	0.14943	0.11398	0.13247	0.999995	75	1	0.14943
Smarcd2	10	0.98186	0.98146	0.999995	658	0	-0.043875	0.61547	0.61395	0.999995	380	0	-0.043875
Arnt2	6	0.98242	0.98255	0.999995	659	0	0.22531	0.50279	0.50044	0.999995	320	0	0.22531
Naa60	6	0.98253	0.98268	0.999995	660	0	0.44552	0.49803	0.49579	0.999995	315	0	0.44552
Pwwp2b	9	0.98292	0.983	0.999995	661	0	0.36132	0.3588	0.3595	0.999995	229	0	0.36132
Gfi1b	9	0.98304	0.98314	0.999995	662	0	-0.0055954	0.45471	0.45501	0.999995	288	0	-0.0055954
Epas1	11	0.98308	0.98313	0.999995	663	0	0.078325	0.73941	0.73918	0.999995	473	0	0.078325
Kat2a	11	0.98339	0.98352	0.999995	664	0	0.49557	0.23997	0.2448	0.999995	147	1	0.49557
Trim66	10	0.98356	0.98326	0.999995	665	0	0.051201	0.95886	0.95772	0.999995	628	0	0.051201
Kmt2a	6	0.98394	0.98386	0.999995	666	0	0.14825	0.014196	0.026308	0.910757	21	1	0.14825
Asf1b	10	0.98415	0.98377	0.999995	667	0	0.33294	0.5392	0.53775	0.999995	341	0	0.33294
Sat1	10	0.9844	0.98398	0.999995	668	0	0.10151	0.90928	0.9086	0.999995	592	0	0.10151
Hr	10	0.98464	0.98425	0.999995	669	0	0.094048	0.23706	0.23783	0.999995	145	1	0.094048
Mier2	11	0.98612	0.98645	0.999995	670	0	0.15942	0.90699	0.90673	0.999995	589	0	0.15942
Piwil2	10	0.98648	0.98594	0.999995	671	0	0.11919	0.4789	0.47648	0.999995	304	0	0.11919
Supt7l	9	0.98671	0.98682	0.999995	672	0	0.43137	0.37804	0.37823	0.999995	252	0	0.43137
Tgfb1	11	0.98681	0.98717	0.999995	673	0	0.03978	0.35284	0.35358	0.999995	221	0	0.03978
Cd274	11	0.98695	0.98738	0.999995	674	0	0.12627	0.19931	0.20916	0.999995	119	1	0.12627
Proc	9	0.98708	0.98725	0.999995	675	0	0.016607	0.85573	0.85537	0.999995	555	0	0.016607
Dot1l	11	0.98718	0.98765	0.999995	676	0	0.45821	0.17232	0.1866	0.999995	105	1	0.45821
Gmeb1	10	0.98769	0.98734	0.999995	677	0	0.10483	0.4548	0.45278	0.999995	289	0	0.10483
Brwd3	10	0.98791	0.98756	0.999995	678	0	0.28299	0.25699	0.25612	0.999995	160	1	0.28299
Ubr7	10	0.98866	0.9883	0.999995	679	0	0.047732	0.65686	0.6548	0.999995	413	0	0.047732
Il17a	9	0.98868	0.9888	0.999995	680	0	0.10865	0.71294	0.7146	0.999995	455	0	0.10865
Zmynd11	10	0.98902	0.98864	0.999995	681	0	0.40013	0.13566	0.14959	0.999995	85	1	0.40013
Grn	10	0.98928	0.98884	0.999995	682	0	0.36114	0.3713	0.36937	0.999995	243	0	0.36114
Ube2e1	10	0.98956	0.98917	0.999995	683	0	0.12649	0.39626	0.39438	0.999995	258	0	0.12649
Hira	11	0.98986	0.9902	0.999995	684	0	0.56363	0.00063015	0.0023008	0.181655	9	3	0.56363
Stat6	11	0.99048	0.99087	0.999995	685	0	0.27298	0.3177	0.31883	0.999995	196	1	0.27298
Hltf	11	0.991	0.99129	0.999995	686	0	-0.057627	0.74763	0.74713	0.999995	478	0	-0.057627
Kdm4b	9	0.99128	0.99145	0.999995	687	0	0.084653	0.82597	0.82587	0.999995	530	0	0.084653
Jak2	10	0.99189	0.99145	0.999995	688	0	0.34245	0.061888	0.092254	0.999995	52	1	0.34245
Kmt2e	6	0.99225	0.9921	0.999995	689	0	0.38431	0.048766	0.058647	0.999995	44	1	0.38431
Chd1l	10	0.99243	0.99199	0.999995	690	0	0.19482	0.24309	0.24325	0.999995	153	1	0.19482
Cd276	9	0.99325	0.99338	0.999995	691	0	0.12173	0.81772	0.81788	0.999995	526	0	0.12173
Tada2b	10	0.99419	0.9939	0.999995	692	0	0.97255	7.6617e-07	4.9479e-06	0.0006	6	5	0.97255
Tnfrsf14	10	0.99429	0.99405	0.999995	693	0	0.14542	0.57024	0.56935	0.999995	362	0	0.14542
Ctla4	9	0.99437	0.9945	0.999995	694	0	0.2022	0.14134	0.15261	0.999995	89	1	0.2022
Ints12	10	0.99438	0.99415	0.999995	695	0	0.30583	0.49443	0.49219	0.999995	314	0	0.30583
Adora2b	9	0.99476	0.99487	0.999995	696	0	0.044123	0.59019	0.59086	0.999995	369	0	0.044123
Bcor	10	0.99507	0.99477	0.999995	697	0	0.57643	0.36875	0.36685	0.999995	241	0	0.57643
Nos2	11	0.99544	0.99568	0.999995	698	0	0.1254	0.90249	0.90218	0.999995	588	0	0.1254
Tdrd9	11	0.99558	0.99582	0.999995	699	0	0.12899	0.083669	0.11519	0.999995	65	1	0.12899
Kdm6a	11	0.99603	0.99623	0.999995	700	0	0.016868	0.59521	0.59461	0.999995	370	0	0.016868
Cd74	9	0.99609	0.99621	0.999995	701	0	0.045939	0.21052	0.21386	0.999995	127	1	0.045939
Rai1	10	0.99626	0.99604	0.999995	702	0	0.076072	0.60667	0.60502	0.999995	374	0	0.076072
Phf14	9	0.99635	0.9965	0.999995	703	0	0.338	0.48948	0.49061	0.999995	310	0	0.338
Jarid2	11	0.99649	0.99667	0.999995	704	0	0.11559	0.19235	0.20359	0.999995	116	1	0.11559
Apc	8	0.99662	0.99666	0.999995	705	0	0.26031	0.004622	0.010178	0.52852	14	1	0.26031
Cxcl12	9	0.99674	0.9969	0.999995	706	0	0.33564	0.24096	0.24232	0.999995	149	1	0.33564
Stk11	10	0.99692	0.99675	0.999995	707	0	0.26936	0.29733	0.29505	0.999995	184	1	0.26936
Smad3	11	0.99695	0.99706	0.999995	708	0	0.35516	0.50361	0.50371	0.999995	321	0	0.35516
Mbtd1	10	0.99732	0.99712	0.999995	709	0	0.62427	0.0072933	0.016561	0.750529	16	2	0.62427
Rb1	11	0.99808	0.99816	0.999995	710	0	0.83587	0.0048578	0.013552	0.656835	15	3	0.83587
Rcor1	9	0.99813	0.99807	0.999995	711	0	0.67866	0.032156	0.057005	0.999995	29	2	0.67866
Suv39h2	11	0.99825	0.99831	0.999995	712	0	0.12981	0.30966	0.31054	0.999995	191	1	0.12981
Phf3	11	0.99854	0.99865	0.999995	713	0	0.30349	0.2724	0.27468	0.999995	169	1	0.30349
Trp53	10	0.9986	0.99839	0.999995	714	0	0.14503	0.026063	0.047594	0.999995	26	1	0.14503
Akap1	11	0.99877	0.99892	0.999995	715	0	0.09315	0.56698	0.56708	0.999995	360	0	0.09315
Vegfa	11	0.99899	0.99907	0.999995	716	0	0.17064	0.67475	0.67442	0.999995	423	0	0.17064
Mapk3	11	0.99929	0.99936	0.999995	717	0	0.39418	0.63441	0.63373	0.999995	396	0	0.39418
Kdm2b	11	0.99955	0.9996	0.999995	718	0	0.73457	4.411e-06	2.4739e-05	0.002569	7	5	0.73457
Usp22	10	0.99982	0.99975	0.999995	719	0	0.42567	1.888e-05	3.4635e-05	0.003147	8	4	0.42567
Pgls	11	0.99984	0.99986	0.999995	720	0	0.35487	0.0355	0.063912	0.999995	32	1	0.35487
Sirt6	9	0.99984	0.99984	0.999995	721	0	0.45897	0.35567	0.35645	0.999995	225	0	0.45897
Suv39h1	9	0.99985	0.99984	0.999995	722	0	0.46325	0.27384	0.27427	0.999995	170	0	0.46325
Tada1	10	0.99986	0.99978	0.999995	723	0	1.1739	2.7505e-09	4.9479e-06	0.0006	3	7	1.1739
Taf5l	11	0.99996	0.99997	0.999995	724	0	1.0351	1.5321e-07	4.9479e-06	0.0006	4	6	1.0351
Pten	11	0.99999	1	0.999995	725	0	0.9654	6.0512e-07	4.9479e-06	0.0006	5	6	0.9654
Fbxw7	11	1	1	0.999995	726	0	1.7005	2.0638e-11	4.9479e-06	0.0006	2	6	1.7005
Control	712	1	1	0.999995	727	28	0.12371	0.19389	0.20497	0.999995	117	23	0.12371

## Sheet: In vitro Clone 9
id	num	neg|score	neg|p-value	neg|fdr	neg|rank	neg|goodsgrna	neg|lfc	pos|score	pos|p-value	pos|fdr	pos|rank	pos|goodsgrna	pos|lfc
Rpl7	8	1.0079e-11	4.9479e-06	0.000225	1	8	-1.6007	1	1	0.999995	726	0	-1.6007
Cdc5l	11	5.1505e-11	4.9479e-06	0.000225	2	11	-1.4935	1	1	0.999995	723	0	-1.4935
Rpl23a	8	5.1691e-11	4.9479e-06	0.000225	3	8	-1.7208	1	1	0.999995	727	0	-1.7208
Eif6	11	1.0436e-10	4.9479e-06	0.000225	4	11	-1.7054	1	1	0.999995	725	0	-1.7054
Brca1	11	8.2935e-10	4.9479e-06	0.000225	5	11	-0.83483	1	1	0.999995	724	0	-0.83483
Rbbp4	10	6.3418e-09	4.9479e-06	0.000225	6	9	-1.2302	0.59371	0.59238	0.999995	388	0	-1.2302
Ube2n	9	1.7823e-08	4.9479e-06	0.000225	7	9	-0.9306	1	1	0.999995	722	0	-0.9306
Gtf3c4	11	2.0227e-08	4.9479e-06	0.000225	8	11	-1.0967	0.9998	0.99983	0.999995	716	0	-1.0967
Huwe1	11	7.1746e-08	4.9479e-06	0.000225	9	10	-1.094	0.99529	0.99558	0.999995	696	0	-1.094
Vhl	11	1.0167e-07	4.9479e-06	0.000225	10	8	-0.63323	0.8603	0.86001	0.999995	570	0	-0.63323
Rpl7a	8	1.3043e-07	4.9479e-06	0.000225	11	6	-0.97037	0.24996	0.2488	0.999995	146	0	-0.97037
Smc1a	10	1.4621e-07	4.9479e-06	0.000225	12	8	-1.1654	0.70467	0.70331	0.999995	468	0	-1.1654
Terf1	11	1.489e-07	4.9479e-06	0.000225	13	9	-1.0735	0.096656	0.096192	0.999995	54	0	-1.0735
Smc2	11	3.5444e-07	1.4844e-05	0.0006	14	9	-1.1124	0.26602	0.26669	0.999995	155	0	-1.1124
Atp6v0c	6	5.8057e-07	4.9479e-06	0.000225	15	6	-1.4165	0.99308	0.9929	0.999995	694	0	-1.4165
Prmt5	9	1.5247e-06	1.4844e-05	0.0006	16	8	-1.2854	0.99608	0.9962	0.999995	699	0	-1.2854
Smc4	11	1.7873e-06	2.4739e-05	0.000899	17	9	-1.2767	0.75403	0.75374	0.999995	500	0	-1.2767
Prpf19	11	2.0697e-06	3.4635e-05	0.001199	18	9	-0.99808	0.95345	0.95329	0.999995	650	0	-0.99808
Hdac3	10	2.3977e-06	4.9479e-06	0.000225	19	10	-1.0805	0.99951	0.99946	0.999995	712	0	-1.0805
Rae1	10	3.2025e-06	4.9479e-06	0.000225	20	10	-0.90048	1	1	0.999995	721	0	-0.90048
Rps19	8	4.7513e-06	2.4739e-05	0.000899	21	8	-1.1182	0.99736	0.99743	0.999995	702	0	-1.1182
Kat8	10	7.3738e-06	4.4531e-05	0.001472	22	8	-0.98377	0.9703	0.9695	0.999995	668	0	-0.98377
Uhrf1	11	8.488e-06	6.4323e-05	0.001948	23	11	-0.8455	0.99999	1	0.999995	720	0	-0.8455
Nfs1	10	1.3014e-05	9.401e-05	0.002734	24	10	-0.91796	0.99973	0.99966	0.999995	713	0	-0.91796
Rpl32	9	1.3197e-05	0.0001237	0.003459	25	9	-1.0844	0.99979	0.99976	0.999995	715	0	-1.0844
Rbx1	8	1.3461e-05	6.4323e-05	0.001948	26	8	-0.67189	0.99858	0.99851	0.999995	710	0	-0.67189
Wrb	10	2.2676e-05	0.00020286	0.005462	27	9	-0.70107	0.95274	0.9517	0.999995	647	0	-0.70107
Aurkb	9	3.9518e-05	0.00034141	0.008807	28	7	-1.091	0.5469	0.54807	0.999995	351	0	-1.091
Taf8	9	4.3248e-05	0.0003513	0.008807	29	8	-0.85801	0.97142	0.97137	0.999995	671	0	-0.85801
Npm1	10	4.4061e-05	0.00040078	0.009712	30	8	-0.86064	0.68974	0.68881	0.999995	460	0	-0.86064
Smarcb1	10	4.5407e-05	0.00043047	0.010095	31	9	-0.66706	0.69991	0.69871	0.999995	465	0	-0.66706
Stk11	10	5.1268e-05	0.00049974	0.011009	32	10	-0.58268	0.99995	0.99994	0.999995	719	0	-0.58268
Mybl2	9	5.6448e-05	0.00045026	0.010229	33	9	-0.66675	0.99994	0.99993	0.999995	718	0	-0.66675
Nat10	11	0.00011047	0.00096484	0.019484	34	9	-0.74812	0.99794	0.99807	0.999995	704	0	-0.74812
Ruvbl2	11	0.00012159	0.0010935	0.021486	35	9	-0.65404	0.30663	0.30759	0.999995	186	0	-0.65404
Ube2i	10	0.00012488	0.0011727	0.021673	36	7	-0.89199	0.16236	0.16109	0.999995	91	0	-0.89199
Polr2b	10	0.00012876	0.0011825	0.021673	37	8	-0.51478	0.35501	0.3531	0.999995	216	0	-0.51478
Rps7	8	0.00013348	0.00077682	0.01661	38	7	-0.9071	0.9579	0.95781	0.999995	653	0	-0.9071
Dmap1	11	0.00013616	0.0012617	0.022372	39	11	-0.81651	0.99986	0.99991	0.999995	717	0	-0.81651
Rps17	6	0.00015527	0.00087578	0.018191	40	6	-1.0693	0.9857	0.98556	0.999995	689	0	-1.0693
Gsg2	9	0.00016922	0.0011924	0.021673	41	7	-0.45218	0.57421	0.57485	0.999995	373	0	-0.45218
Mis18bp1	10	0.00017135	0.0014992	0.025951	42	9	-0.90527	0.99832	0.99815	0.999995	707	0	-0.90527
Myc	10	0.00018147	0.0015784	0.026686	43	8	-0.70036	0.96182	0.9606	0.999995	658	0	-0.70036
Chd8	11	0.00020658	0.0019247	0.031802	44	8	-0.35588	0.70686	0.70669	0.999995	470	0	-0.35588
Rbbp7	11	0.00024436	0.0021325	0.033703	45	10	-0.33308	0.55221	0.55287	0.999995	356	0	-0.33308
Taf1	11	0.00024439	0.0021325	0.033703	46	11	-0.80582	0.99976	0.9998	0.999995	714	0	-0.80582
Eif3b	11	0.00034946	0.0031419	0.047056	47	9	-0.48499	0.67168	0.6709	0.999995	445	0	-0.48499
Prmt1	10	0.00036906	0.0031023	0.047056	48	7	-0.74771	0.18297	0.18191	0.999995	102	0	-0.74771
Ube2v1	9	0.00042116	0.0031716	0.047056	49	8	-0.53628	0.98292	0.983	0.999995	686	0	-0.53628
Plk1	10	0.00047884	0.0038742	0.056331	50	8	-0.91464	0.95586	0.95482	0.999995	651	0	-0.91464
Setd1a	10	0.00051386	0.0040721	0.056931	51	8	-0.43029	0.25994	0.25781	0.999995	152	0	-0.43029
Brd1	10	0.00072897	0.0055268	0.075811	52	10	-0.26749	0.99927	0.99921	0.999995	711	0	-0.26749
Elmsan1	6	0.00073247	0.0040424	0.056931	53	5	-0.67727	0.075835	0.076153	0.999995	43	0	-0.67727
Terf2	11	0.00078696	0.0063185	0.085065	54	6	-0.47579	0.30865	0.30953	0.999995	187	0	-0.47579
Cdk9	10	0.00098286	0.0074169	0.096287	55	9	-1.0123	0.009607	0.0097919	0.790967	9	1	-1.0123
Brd9	11	0.0010228	0.0077731	0.099142	56	8	-0.54386	0.29538	0.2966	0.999995	178	0	-0.54386
Smarca4	10	0.0013688	0.0097919	0.114708	57	8	-0.47283	0.95828	0.95722	0.999995	654	0	-0.47283
Rpl9	6	0.0013709	0.0073575	0.096287	58	5	-0.75561	0.85859	0.85798	0.999995	568	0	-0.75561
Ash2l	9	0.0015084	0.0093862	0.114708	59	9	-0.30971	0.99849	0.99832	0.999995	709	0	-0.30971
Ctcf	10	0.0015553	0.0109	0.120068	60	6	-0.78151	0.20312	0.2021	0.999995	115	0	-0.78151
Setd2	11	0.0016262	0.011939	0.128809	61	7	-0.30536	0.91997	0.91938	0.999995	612	0	-0.30536
Sp140	8	0.0016493	0.0098315	0.114708	62	7	-0.92508	0.98054	0.98106	0.999995	683	0	-0.92508
Kif11	8	0.0016662	0.0099106	0.114708	63	7	-0.73901	0.71111	0.71233	0.999995	475	0	-0.73901
Kras	8	0.0017666	0.010494	0.117377	64	8	-0.67548	0.99823	0.99815	0.999995	706	0	-0.67548
Gars	10	0.0017849	0.012048	0.128809	65	8	-0.64921	0.70552	0.70421	0.999995	469	0	-0.64921
Carm1	10	0.0018371	0.012385	0.129856	66	8	-0.55149	0.83215	0.8315	0.999995	550	0	-0.55149
Bptf	10	0.0018583	0.012503	0.129856	67	7	-0.45756	0.75595	0.75472	0.999995	504	0	-0.45756
Kdm8	6	0.0018997	0.0099403	0.114708	68	6	-0.48652	0.9981	0.99817	0.999995	705	0	-0.48652
Phf11b	5	0.00196	0.0083174	0.104255	69	5	-0.69986	0.97242	0.97201	0.999995	673	0	-0.69986
Set	6	0.0019908	0.010306	0.117075	70	5	-0.86091	0.88987	0.88971	0.999995	596	0	-0.86091
Hdac4	11	0.0020924	0.015116	0.154778	71	8	-0.47202	0.93597	0.93505	0.999995	634	0	-0.47202
Dnajc2	11	0.0021531	0.015541	0.156924	72	10	-0.34782	0.97315	0.9731	0.999995	674	0	-0.34782
Prdm15	11	0.0024386	0.017431	0.168969	73	10	-0.46433	0.98238	0.9824	0.999995	684	0	-0.46433
Senp3	11	0.0028052	0.019757	0.186536	74	9	-0.3007	0.99784	0.99797	0.999995	703	0	-0.3007
Nelfa	6	0.0031758	0.015789	0.157239	75	5	-0.72296	0.29822	0.29731	0.999995	182	0	-0.72296
Suds3	8	0.0031816	0.018619	0.178105	76	5	-0.82114	0.93546	0.93544	0.999995	631	0	-0.82114
Kmt2d	6	0.0035061	0.017293	0.168969	77	4	-0.57779	0.56522	0.56226	0.999995	366	0	-0.57779
Chmp5	9	0.0036858	0.02132	0.198718	78	5	-0.44899	0.18289	0.18439	0.999995	101	0	-0.44899
Sp110	9	0.003908	0.02231	0.205309	79	7	-0.83394	0.97656	0.97684	0.999995	679	0	-0.83394
Smarcc1	11	0.0041239	0.027773	0.243261	80	8	-0.44644	0.84673	0.84668	0.999995	562	0	-0.44644
Nat9	9	0.0041728	0.023745	0.215782	81	7	-0.31639	0.44036	0.4409	0.999995	274	0	-0.31639
2410016O06Rik	10	0.0042303	0.0261	0.234257	82	9	-0.27829	0.97521	0.97452	0.999995	676	0	-0.27829
Sin3a	11	0.0042614	0.028475	0.246446	83	9	-0.33322	0.96167	0.96134	0.999995	657	0	-0.33322
Taf10	11	0.0047785	0.031493	0.260178	84	9	-0.28011	0.92668	0.92567	0.999995	619	0	-0.28011
Clock	9	0.0048297	0.027179	0.240963	85	7	-0.50751	0.76217	0.76254	0.999995	507	0	-0.50751
Eif3a	10	0.0049738	0.030039	0.25184	86	7	-0.38982	0.91277	0.91193	0.999995	608	0	-0.38982
Psmd1	10	0.0049923	0.030138	0.25184	87	6	-0.093078	0.13791	0.1367	0.999995	79	0	-0.093078
Prmt7	9	0.005263	0.029405	0.251502	88	7	-0.28122	0.76088	0.76139	0.999995	506	0	-0.28122
Mysm1	11	0.0058318	0.037322	0.298166	89	10	-0.46618	0.64669	0.64585	0.999995	430	0	-0.46618
Yeats4	10	0.0062017	0.036619	0.295803	90	6	-0.30312	0.45107	0.44852	0.999995	288	0	-0.30312
Smc3	11	0.0063592	0.039994	0.31264	91	9	-0.36754	0.11709	0.11762	0.999995	69	0	-0.36754
Prdm11	9	0.0063979	0.034868	0.284819	92	7	-0.11365	0.35017	0.35106	0.999995	213	0	-0.11365
Zzz3	11	0.0077633	0.047119	0.353148	93	9	-0.35231	0.89361	0.89355	0.999995	600	0	-0.35231
Polr2d	9	0.008094	0.043319	0.328799	94	8	-0.38291	0.18579	0.18738	0.999995	105	0	-0.38291
Chmp2a	9	0.008116	0.043418	0.328799	95	8	-0.73442	0.99585	0.99597	0.999995	698	0	-0.73442
Supt6	6	0.0083182	0.038203	0.301885	96	5	-0.53471	0.8595	0.85887	0.999995	569	0	-0.53471
Dnmt1	11	0.008334	0.049642	0.368265	97	7	-0.41265	0.96042	0.96027	0.999995	655	0	-0.41265
Trim33	11	0.0086068	0.050859	0.373483	98	9	-0.30145	0.26815	0.26901	0.999995	157	0	-0.30145
Cbx3	6	0.0096101	0.04318	0.328799	99	2	0.24033	0.3559	0.35412	0.999995	218	0	0.24033
Taf12	10	0.0098523	0.054541	0.39048	100	6	-0.42596	0.57264	0.5717	0.999995	371	0	-0.42596
Aurka	10	0.0099488	0.055016	0.39048	101	8	-0.52707	0.4548	0.45278	0.999995	293	0	-0.52707
Taf5	11	0.010201	0.058163	0.406579	102	8	-0.69571	0.49835	0.49859	0.999995	323	0	-0.69571
Orc1	11	0.010465	0.05934	0.41086	103	8	-0.34938	0.7789	0.77878	0.999995	519	0	-0.34938
Sap130	11	0.011128	0.062388	0.425906	104	9	-0.21034	0.7178	0.71748	0.999995	479	0	-0.21034
Sirt3	11	0.011204	0.062685	0.425906	105	9	-0.15696	0.21194	0.21192	0.999995	120	0	-0.15696
Chmp4b	11	0.011502	0.063932	0.430356	106	8	-0.34815	0.95086	0.95058	0.999995	645	0	-0.34815
Snapc4	11	0.011876	0.065555	0.432206	107	7	-0.20284	0.41215	0.41277	0.999995	252	0	-0.20284
Ccl2	10	0.012548	0.06599	0.432206	108	8	-0.26821	0.9966	0.99638	0.999995	701	0	-0.26821
Crebbp	11	0.012581	0.068781	0.43888	109	7	-0.14751	0.66703	0.66623	0.999995	439	0	-0.14751
Mrgbp	6	0.012689	0.05461	0.39048	110	4	-0.48419	0.40658	0.40402	0.999995	250	0	-0.48419
Jmjd4	9	0.013116	0.065377	0.432206	111	7	-0.22573	0.99652	0.99666	0.999995	700	0	-0.22573
Chd5	11	0.013429	0.072373	0.457523	112	7	-0.36195	0.12213	0.12241	0.999995	71	0	-0.36195
Lrp5	9	0.013847	0.068326	0.43888	113	7	-0.12169	0.97865	0.97881	0.999995	681	0	-0.12169
Taf9	5	0.014703	0.055322	0.39048	114	5	-0.59569	0.9853	0.9843	0.999995	688	0	-0.59569
Ep400	11	0.014758	0.078419	0.481505	115	9	-0.30998	0.27979	0.28056	0.999995	164	0	-0.30998
Phb	8	0.014889	0.06882	0.43888	116	7	-0.23906	0.88189	0.8813	0.999995	589	0	-0.23906
Elp3	11	0.014983	0.079478	0.481505	117	7	-0.33317	0.4838	0.48383	0.999995	314	0	-0.33317
Smarce1	9	0.015309	0.074471	0.462738	118	7	-0.45642	0.71749	0.71906	0.999995	478	0	-0.45642
Yeats2	11	0.016729	0.08694	0.514069	119	6	-0.13237	0.15427	0.15515	0.999995	88	0	-0.13237
Map3k7	11	0.016874	0.087672	0.514069	120	9	-0.42984	0.62697	0.62659	0.999995	414	0	-0.42984
Tet1	11	0.016879	0.087682	0.514069	121	9	-0.16169	0.66072	0.65965	0.999995	434	0	-0.16169
Tgfb2	9	0.01736	0.083545	0.501962	122	8	-0.15074	0.96795	0.96807	0.999995	665	0	-0.15074
Rbm14	11	0.017659	0.091046	0.525323	123	8	-0.24302	0.93585	0.9349	0.999995	632	0	-0.24302
Supt5	6	0.018088	0.073808	0.462571	124	4	-0.59769	0.97242	0.97262	0.999995	672	0	-0.59769
Kdm3b	11	0.018463	0.094371	0.530188	125	8	-0.20843	0.73138	0.73099	0.999995	485	0	-0.20843
Ttf1	11	0.018878	0.096439	0.531148	126	7	-0.19768	0.46807	0.46877	0.999995	307	0	-0.19768
Kat5	10	0.019763	0.093698	0.530188	127	5	-0.012973	0.72784	0.72709	0.999995	484	0	-0.012973
Supt4a	6	0.019825	0.078894	0.481505	128	3	-0.036363	0.43881	0.43686	0.999995	271	0	-0.036363
Hr	10	0.020049	0.094807	0.530188	129	7	-0.32446	0.78532	0.78386	0.999995	523	0	-0.32446
Shprh	10	0.020462	0.096301	0.531148	130	8	-0.2156	0.28125	0.27889	0.999995	165	0	-0.2156
Pcgf5	8	0.020463	0.090393	0.525323	131	7	-0.43019	0.99536	0.99539	0.999995	697	0	-0.43019
Brd4	10	0.021086	0.098686	0.539433	132	7	-0.4311	0.53145	0.5295	0.999995	344	0	-0.4311
Sap18	8	0.02144	0.093985	0.530188	133	6	-0.28759	0.92881	0.92884	0.999995	622	0	-0.28759
Dnajc1	11	0.021636	0.10803	0.57747	134	6	-0.36651	0.44862	0.44969	0.999995	285	0	-0.36651
Tada2a	9	0.021766	0.099972	0.542387	135	5	-0.21158	0.34382	0.34457	0.999995	205	0	-0.21158
Egfr	11	0.021938	0.10918	0.579347	136	6	-0.10826	0.60077	0.60024	0.999995	394	0	-0.10826
Chaf1b	10	0.023101	0.10595	0.570557	137	8	-0.34099	0.66704	0.66554	0.999995	440	0	-0.34099
Rnf20	11	0.023115	0.11378	0.593756	138	9	-0.16656	0.69505	0.69473	0.999995	462	0	-0.16656
Ino80	11	0.023597	0.11584	0.594549	139	7	-0.35916	0.68182	0.68164	0.999995	451	0	-0.35916
Hdgf	11	0.02406	0.11772	0.594549	140	8	-0.18662	0.62175	0.62129	0.999995	410	0	-0.18662
Bahcc1	11	0.024423	0.11923	0.597792	141	8	-0.24528	0.24437	0.24494	0.999995	143	0	-0.24528
Cdc73	9	0.024942	0.1107	0.583177	142	6	-0.219	0.10529	0.10586	0.999995	61	0	-0.219
Prdm16	11	0.025001	0.12151	0.600915	143	9	-0.12545	0.99848	0.99855	0.999995	708	0	-0.12545
Entpd1	10	0.025393	0.11434	0.593756	144	8	-0.19511	0.43971	0.43693	0.999995	273	0	-0.19511
Rnf40	9	0.027046	0.11776	0.594549	145	6	-0.33911	0.9086	0.90878	0.999995	605	0	-0.33911
Cd274	11	0.027796	0.13198	0.627098	146	5	0.13319	0.29022	0.29134	0.999995	173	0	0.13319
Rel	9	0.028121	0.12149	0.600915	147	4	0.0093417	0.81125	0.81145	0.999995	536	0	0.0093417
Brd8	11	0.029551	0.13891	0.655774	148	9	-0.27666	0.8856	0.88596	0.999995	591	0	-0.27666
Alg10b	9	0.030369	0.12855	0.623046	149	7	-0.24479	0.0017354	0.0016477	0.399281	3	1	-0.24479
Ido2	8	0.030576	0.12767	0.623046	150	4	-0.31876	0.28214	0.28166	0.999995	166	0	-0.31876
Aanat	8	0.031796	0.13176	0.627098	151	5	-0.10097	0.8352	0.83501	0.999995	552	0	-0.10097
Kmt2c	6	0.032875	0.11624	0.594549	152	5	-0.31154	0.50106	0.49884	0.999995	325	0	-0.31154
Kdm1b	11	0.032887	0.1511	0.704183	153	8	-0.22038	0.96928	0.96899	0.999995	666	0	-0.22038
Dimt1	10	0.03582	0.15036	0.704183	154	7	-0.18897	0.68659	0.68571	0.999995	456	0	-0.18897
Pdcd1	11	0.036384	0.16212	0.736623	155	8	-0.23469	0.98803	0.98842	0.999995	692	0	-0.23469
Kat7	6	0.037302	0.12845	0.623046	156	4	-0.49656	0.86144	0.86079	0.999995	572	0	-0.49656
Jade3	6	0.0377	0.12954	0.623684	157	5	-0.23186	0.9244	0.92511	0.999995	618	0	-0.23186
Foxp3	10	0.038078	0.15812	0.727552	158	7	-0.16013	0.71104	0.70971	0.999995	474	0	-0.16013
Arnt	11	0.039087	0.16995	0.757978	159	8	-0.12868	0.36231	0.36308	0.999995	223	0	-0.12868
Chd2	11	0.040484	0.17425	0.769675	160	7	-0.13637	0.71465	0.71441	0.999995	477	0	-0.13637
Icos	8	0.040925	0.15777	0.727552	161	6	-0.15019	0.93003	0.93014	0.999995	623	0	-0.15019
Psmb8	10	0.041055	0.16851	0.756217	162	6	-0.15623	0.34892	0.34702	0.999995	211	0	-0.15623
Nat6	10	0.043014	0.17469	0.769675	163	7	-0.15575	0.84606	0.84527	0.999995	560	0	-0.15575
Jmjd6	11	0.043235	0.18233	0.793715	164	8	-0.1371	0.10309	0.10293	0.999995	59	0	-0.1371
Rbbp5	10	0.044091	0.17818	0.780337	165	7	-0.15511	0.74262	0.74182	0.999995	494	0	-0.15511
Dpf2	11	0.048339	0.19732	0.842337	166	7	-0.38856	0.24765	0.24817	0.999995	144	0	-0.38856
C920025E04Rik	6	0.049231	0.1604	0.733383	167	4	-0.23711	0.52063	0.51789	0.999995	337	0	-0.23711
Mapk1	9	0.049582	0.18688	0.807309	168	7	-0.15508	0.97102	0.97089	0.999995	670	0	-0.15508
Setd8	9	0.049846	0.18767	0.807309	169	7	-0.29623	0.99352	0.9936	0.999995	695	0	-0.29623
Dpep1	11	0.051972	0.2075	0.862014	170	8	-0.19171	0.41909	0.41975	0.999995	261	0	-0.19171
Kat6b	6	0.052259	0.16763	0.756217	171	5	-0.21289	0.964	0.96442	0.999995	660	0	-0.21289
Rnase12	9	0.05377	0.19813	0.842337	172	7	-0.081328	0.66897	0.66996	0.999995	442	0	-0.081328
Alkbh2	9	0.055541	0.20292	0.852726	173	5	-0.31046	0.7553	0.75575	0.999995	502	0	-0.31046
Smarcd1	10	0.056261	0.21636	0.893701	174	6	-0.10913	0.74148	0.74056	0.999995	493	0	-0.10913
Prdm4	10	0.057975	0.22063	0.906211	175	5	-0.099241	0.7322	0.73152	0.999995	486	0	-0.099241
Gmeb2	11	0.058025	0.22429	0.907734	176	8	-0.21972	0.20278	0.20259	0.999995	114	0	-0.21972
Noc4l	7	0.059192	0.20187	0.852726	177	6	-0.23664	0.94953	0.94951	0.999995	644	0	-0.23664
Mier2	11	0.063551	0.23961	0.926584	178	7	-0.1215	0.39892	0.3992	0.999995	247	0	-0.1215
Ccr4	10	0.063848	0.2344	0.926016	179	7	-0.14723	0.39051	0.38894	0.999995	240	0	-0.14723
Nap1l5	10	0.064014	0.23475	0.926016	180	7	-0.089689	0.96465	0.96357	0.999995	662	0	-0.089689
Ehmt2	10	0.06438	0.23541	0.926016	181	5	0.021838	0.34541	0.34368	0.999995	208	0	0.021838
Phf12	10	0.064483	0.23564	0.926016	182	5	-0.048002	0.77579	0.77436	0.999995	517	0	-0.048002
Taf3	11	0.065191	0.24418	0.934324	183	7	-0.30031	0.0063498	0.0063778	0.772782	6	1	-0.30031
Il17a	9	0.065878	0.23223	0.926016	184	5	-0.11936	0.39971	0.40041	0.999995	248	0	-0.11936
Mael	11	0.066039	0.24653	0.938359	185	8	-0.14965	0.89743	0.89736	0.999995	601	0	-0.14965
Asxl2	6	0.066677	0.20433	0.853738	186	5	-0.40696	0.87566	0.8753	0.999995	585	0	-0.40696
H2-Q7	7	0.069347	0.22475	0.907734	187	5	-0.35002	0.18623	0.18373	0.999995	106	0	-0.35002
Mbd5	11	0.071705	0.26159	0.970287	188	5	0.015066	0.18298	0.18354	0.999995	103	0	0.015066
Aurkc	8	0.072748	0.23849	0.926584	189	6	-0.24015	0.73902	0.73946	0.999995	489	0	-0.24015
Mier1	9	0.073127	0.25246	0.955917	190	6	-0.19935	0.016664	0.016373	0.915606	13	1	-0.19935
Phf7	8	0.073183	0.23952	0.926584	191	5	-0.29948	0.29437	0.29391	0.999995	177	0	-0.29948
Phf3	11	0.073265	0.2656	0.980152	192	8	-0.20697	0.61645	0.61624	0.999995	406	0	-0.20697
Sirt7	9	0.074354	0.25572	0.958299	193	6	-0.077533	0.82719	0.82713	0.999995	545	0	-0.077533
Vegfa	11	0.074804	0.26938	0.989081	194	4	0.076043	0.63724	0.63626	0.999995	426	0	0.076043
Phf11a	6	0.075225	0.22464	0.907734	195	5	-0.25483	0.94696	0.94777	0.999995	641	0	-0.25483
Rere	11	0.079376	0.28111	0.999995	196	8	-0.23229	0.96123	0.96095	0.999995	656	0	-0.23229
Prdm12	8	0.079708	0.2538	0.956033	197	6	-0.41892	0.9362	0.93631	0.999995	635	0	-0.41892
Hat1	10	0.079973	0.27117	0.990655	198	7	-0.20889	0.98701	0.98659	0.999995	691	0	-0.20889
Gm10094	6	0.083264	0.2431	0.934324	199	4	-0.45224	0.93318	0.93389	0.999995	627	0	-0.45224
Tgfb1	11	0.083828	0.29258	0.999995	200	6	-0.0749	0.89761	0.8975	0.999995	602	0	-0.0749
Phf6	9	0.085003	0.28274	0.999995	201	7	-0.20533	0.46142	0.46183	0.999995	302	0	-0.20533
Kdm4d	11	0.085163	0.29591	0.999995	202	8	-0.20688	0.090184	0.090067	0.999995	49	0	-0.20688
Uty	11	0.088956	0.3056	0.999995	203	8	-0.23589	0.92222	0.92151	0.999995	615	0	-0.23589
H2-DMa	6	0.089612	0.25752	0.9601	204	5	-0.11406	0.96429	0.96467	0.999995	661	0	-0.11406
H2-Q6	10	0.090895	0.29621	0.999995	205	7	-0.12258	0.15354	0.15219	0.999995	87	0	-0.12258
Ruvbl1	11	0.091235	0.31115	0.999995	206	7	-0.34859	0.86858	0.86852	0.999995	580	0	-0.34859
Msh6	11	0.093139	0.31556	0.999995	207	8	-0.080813	0.565	0.56525	0.999995	365	0	-0.080813
Nos2	11	0.093604	0.31665	0.999995	208	5	0.012369	0.33059	0.33127	0.999995	197	0	0.012369
Hif3a	10	0.094775	0.3054	0.999995	209	7	-0.052149	0.95323	0.95223	0.999995	649	0	-0.052149
Mbd3	10	0.095383	0.30683	0.999995	210	6	-0.18999	0.88254	0.88224	0.999995	590	0	-0.18999
Smn1	10	0.095457	0.30707	0.999995	211	6	-0.16608	0.3602	0.35847	0.999995	221	0	-0.16608
Satb1	10	0.095807	0.30773	0.999995	212	7	-0.10104	0.52293	0.52141	0.999995	339	0	-0.10104
Tap1	9	0.098724	0.31262	0.999995	213	5	-0.074346	0.8644	0.86387	0.999995	575	0	-0.074346
Arid4a	11	0.1001	0.33245	0.999995	214	8	-0.087461	0.72003	0.71966	0.999995	482	0	-0.087461
Cecr2	11	0.1004	0.33315	0.999995	215	8	-0.17674	0.81533	0.8155	0.999995	540	0	-0.17674
Setdb2	11	0.10101	0.33453	0.999995	216	8	-0.09745	0.13338	0.13331	0.999995	77	0	-0.09745
Ado	10	0.10163	0.32089	0.999995	217	4	0.061124	0.65882	0.6567	0.999995	433	0	0.061124
G2e3	11	0.10178	0.33634	0.999995	218	8	-0.11576	0.44532	0.44607	0.999995	281	0	-0.11576
Fbxl19	11	0.10286	0.33903	0.999995	219	8	-0.19534	0.98416	0.98428	0.999995	687	0	-0.19534
Tdo2	10	0.10329	0.32455	0.999995	220	7	-0.14533	0.60667	0.60502	0.999995	400	0	-0.14533
Psmb9	11	0.10442	0.3428	0.999995	221	8	-0.21134	0.96648	0.96623	0.999995	664	0	-0.21134
Adora2a	11	0.10498	0.3441	0.999995	222	5	0.012204	0.4752	0.47563	0.999995	310	0	0.012204
Arid4b	10	0.10633	0.33138	0.999995	223	7	-0.18057	0.97437	0.97365	0.999995	675	0	-0.18057
Sfmbt1	11	0.10634	0.3474	0.999995	224	7	-0.15115	0.27346	0.27419	0.999995	160	0	-0.15115
Suv39h2	11	0.1075	0.3502	0.999995	225	7	-0.075284	0.88986	0.88996	0.999995	595	0	-0.075284
Cxcr4	11	0.10838	0.35215	0.999995	226	6	-0.021802	0.25635	0.25691	0.999995	150	0	-0.021802
Ehmt1	6	0.10854	0.29888	0.999995	227	4	-0.050729	0.72361	0.72221	0.999995	483	0	-0.050729
Smad6	11	0.10877	0.35298	0.999995	228	6	-0.13112	0.43192	0.43254	0.999995	266	0	-0.13112
Smad7	10	0.11224	0.34376	0.999995	229	6	-0.088359	0.39626	0.39438	0.999995	244	0	-0.088359
Kdm5a	11	0.11274	0.36237	0.999995	230	7	-0.32845	0.22775	0.22793	0.999995	128	0	-0.32845
Smyd3	11	0.11385	0.36466	0.999995	231	7	-0.13452	0.29126	0.29239	0.999995	175	0	-0.13452
Epc2	8	0.1169	0.33527	0.999995	232	5	-0.099447	0.82383	0.82366	0.999995	543	0	-0.099447
Prdm10	11	0.11744	0.37127	0.999995	233	7	-0.048886	0.23665	0.23701	0.999995	137	0	-0.048886
Phf19	11	0.11759	0.37159	0.999995	234	7	-0.041813	0.66284	0.66179	0.999995	437	0	-0.041813
Ptger3	10	0.11948	0.35881	0.999995	235	5	-0.018847	0.44428	0.44164	0.999995	279	0	-0.018847
Chd6	11	0.11955	0.37507	0.999995	236	5	0.037081	0.41302	0.4135	0.999995	254	0	0.037081
Prmt6	11	0.11968	0.37526	0.999995	237	6	-0.13154	0.71055	0.71036	0.999995	472	0	-0.13154
Msl3	8	0.12036	0.34256	0.999995	238	6	-0.10655	0.31608	0.31564	0.999995	189	0	-0.10655
Dnmt3b	11	0.12057	0.37681	0.999995	239	4	0.094123	0.81775	0.81775	0.999995	541	0	0.094123
Stat5a	9	0.12134	0.35455	0.999995	240	6	-0.05864	0.50332	0.50467	0.999995	328	0	-0.05864
Arid1a	11	0.12615	0.3869	0.999995	241	7	-0.13379	0.48612	0.48618	0.999995	317	0	-0.13379
Asxl3	9	0.12665	0.36469	0.999995	242	6	-0.10125	0.6969	0.69873	0.999995	463	0	-0.10125
Ing3	8	0.12993	0.36238	0.999995	243	5	-0.14299	0.60564	0.60642	0.999995	399	0	-0.14299
Asz1	9	0.13077	0.3723	0.999995	244	6	-0.21157	0.40557	0.40604	0.999995	249	0	-0.21157
B2m	10	0.13141	0.38258	0.999995	245	5	-0.015684	0.095348	0.094708	0.999995	52	0	-0.015684
Sf3b3	10	0.13269	0.38508	0.999995	246	7	-0.34947	0.74034	0.73947	0.999995	492	0	-0.34947
Phrf1	10	0.13344	0.38643	0.999995	247	7	-0.1388	0.60889	0.60721	0.999995	401	0	-0.1388
Fbxo11	10	0.13605	0.39174	0.999995	248	6	-0.15247	0.79168	0.79039	0.999995	525	0	-0.15247
Smndc1	8	0.13633	0.37497	0.999995	249	5	-0.39541	0.65715	0.65839	0.999995	432	0	-0.39541
Il4	9	0.1383	0.38565	0.999995	250	3	0.040148	0.62882	0.6298	0.999995	416	0	0.040148
Hmgn3	8	0.13909	0.38015	0.999995	251	5	-0.21822	0.45292	0.45259	0.999995	290	0	-0.21822
Smchd1	9	0.14039	0.38903	0.999995	252	6	-0.13565	0.86692	0.86651	0.999995	578	0	-0.13565
Smarca5	9	0.14183	0.39152	0.999995	253	4	0.011026	0.62448	0.62552	0.999995	411	0	0.011026
Alg13	11	0.1452	0.42082	0.999995	254	7	-0.3198	0.70825	0.7079	0.999995	471	0	-0.3198
Ccnt2	11	0.14627	0.42258	0.999995	255	7	-0.38503	0.20622	0.20614	0.999995	117	0	-0.38503
Alkbh3	10	0.15106	0.42081	0.999995	256	6	-0.16952	0.37972	0.37798	0.999995	237	0	-0.16952
Ep300	11	0.156	0.43946	0.999995	257	6	-0.0061696	0.87996	0.88045	0.999995	586	0	-0.0061696
Phf23	10	0.1567	0.43163	0.999995	258	7	-0.1516	0.66175	0.66	0.999995	435	0	-0.1516
Sat1	10	0.15698	0.43206	0.999995	259	6	-0.11361	0.30107	0.29908	0.999995	183	0	-0.11361
Kdm4b	9	0.15771	0.41841	0.999995	260	6	-0.16924	0.61367	0.6141	0.999995	402	0	-0.16924
Dnmt3a	11	0.16136	0.44801	0.999995	261	7	-0.14153	0.23555	0.23594	0.999995	136	0	-0.14153
Nptxr	11	0.16387	0.45214	0.999995	262	6	-0.057014	0.71959	0.7192	0.999995	481	0	-0.057014
L3mbtl3	10	0.16438	0.44607	0.999995	263	7	-0.11878	0.98264	0.98234	0.999995	685	0	-0.11878
Flt4	11	0.17075	0.4635	0.999995	264	4	0.25275	0.42938	0.42991	0.999995	265	0	0.25275
Stat4	9	0.1724	0.44349	0.999995	265	6	-0.17027	0.95188	0.9517	0.999995	646	0	-0.17027
Suv420h1	6	0.17384	0.3959	0.999995	266	3	-0.017217	0.20175	0.20162	0.999995	113	0	-0.017217
Hspbap1	10	0.17543	0.46486	0.999995	267	2	0.087159	0.89069	0.89046	0.999995	598	0	0.087159
Mphosph8	9	0.17692	0.45046	0.999995	268	6	-0.18293	0.70128	0.70321	0.999995	466	0	-0.18293
Smad4	9	0.17696	0.4505	0.999995	269	5	-0.05147	0.46076	0.46107	0.999995	301	0	-0.05147
L3mbtl2	11	0.17826	0.47548	0.999995	270	3	0.30296	0.097945	0.097617	0.999995	56	0	0.30296
Prkaa2	10	0.17827	0.46922	0.999995	271	6	-0.10172	0.51157	0.50989	0.999995	333	0	-0.10172
Tinagl1	9	0.17876	0.45366	0.999995	272	5	-0.0097111	0.2642	0.26504	0.999995	154	0	-0.0097111
Tnrc18	11	0.1804	0.47867	0.999995	273	6	-0.1434	0.41127	0.41194	0.999995	251	0	-0.1434
Pygo2	10	0.18085	0.47306	0.999995	274	6	-0.094396	0.24309	0.24139	0.999995	140	0	-0.094396
Phf8	10	0.18318	0.47622	0.999995	275	5	-0.074221	0.43511	0.43231	0.999995	270	0	-0.074221
Atad2b	10	0.18743	0.48223	0.999995	276	5	0.045528	0.47603	0.47374	0.999995	311	0	0.045528
Chd1	10	0.18807	0.48317	0.999995	277	6	-0.22903	0.93679	0.93622	0.999995	637	0	-0.22903
Dicer1	11	0.18829	0.49118	0.999995	278	7	-0.071108	0.60505	0.60459	0.999995	397	0	-0.071108
Phip	11	0.18948	0.49298	0.999995	279	7	-0.13171	0.21762	0.21766	0.999995	122	0	-0.13171
Hdac7	11	0.19349	0.49896	0.999995	280	7	-0.1934	0.97639	0.9765	0.999995	678	0	-0.1934
Chrac1	9	0.19675	0.48178	0.999995	281	5	-0.033931	0.1209	0.12162	0.999995	70	0	-0.033931
Mina	11	0.19881	0.50698	0.999995	282	7	-0.35482	0.46004	0.46082	0.999995	299	0	-0.35482
Brd2	6	0.1992	0.43129	0.999995	283	4	-0.15741	0.78345	0.78218	0.999995	521	0	-0.15741
Kdr	11	0.20428	0.51482	0.999995	284	5	0.10658	0.76373	0.76338	0.999995	509	0	0.10658
Mecp2	11	0.20447	0.51504	0.999995	285	7	-0.09032	0.86678	0.86678	0.999995	577	0	-0.09032
Tdrd3	10	0.20724	0.50963	0.999995	286	6	-0.029163	0.94599	0.94531	0.999995	640	0	-0.029163
Cxxc1	10	0.20884	0.51182	0.999995	287	4	0.10229	0.56662	0.56568	0.999995	367	0	0.10229
Hdac10	11	0.21047	0.52377	0.999995	288	5	0.015765	0.10947	0.1096	0.999995	65	0	0.015765
Phf10	10	0.21055	0.51402	0.999995	289	6	-0.04284	0.96356	0.96236	0.999995	659	0	-0.04284
Piwil2	10	0.21172	0.5157	0.999995	290	6	-0.042575	0.63876	0.63709	0.999995	427	0	-0.042575
Pmp22	10	0.21194	0.51595	0.999995	291	5	-0.046873	0.50819	0.50636	0.999995	332	0	-0.046873
Rela	11	0.21446	0.52966	0.999995	292	7	-0.065336	0.57615	0.57602	0.999995	376	0	-0.065336
Meaf6	9	0.21463	0.5091	0.999995	293	6	-0.19241	0.66766	0.66862	0.999995	441	0	-0.19241
Rcc1	8	0.21568	0.49194	0.999995	294	5	-0.062488	0.1073	0.10751	0.999995	64	0	-0.062488
Mta1	10	0.21598	0.52091	0.999995	295	6	-0.038575	0.44956	0.44694	0.999995	286	0	-0.038575
Setdb1	11	0.21646	0.53264	0.999995	296	5	0.017023	0.023104	0.023507	0.999995	15	0	0.017023
Stk31	10	0.21648	0.52146	0.999995	297	6	-0.076094	0.00064307	0.00089557	0.32554	2	1	-0.076094
Sp100	9	0.21718	0.51282	0.999995	298	6	-0.21424	0.93697	0.93694	0.999995	638	0	-0.21424
Mbd6	11	0.21761	0.53424	0.999995	299	5	0.081533	0.82514	0.82518	0.999995	544	0	0.081533
H2-K1	11	0.21899	0.53614	0.999995	300	6	-0.030193	0.19235	0.19266	0.999995	109	0	-0.030193
Phf11d	6	0.21946	0.45949	0.999995	301	4	-0.17846	0.062016	0.062447	0.999995	36	0	-0.17846
Eng	10	0.2206	0.52676	0.999995	302	4	0.094945	0.20731	0.20617	0.999995	118	0	0.094945
Prdm9	11	0.22079	0.53913	0.999995	303	7	-0.078808	0.90797	0.90765	0.999995	604	0	-0.078808
Brca2	11	0.22209	0.54081	0.999995	304	7	-0.29952	0.44283	0.44365	0.999995	278	0	-0.29952
Setd4	11	0.22301	0.54235	0.999995	305	6	-0.1936	0.83364	0.83354	0.999995	551	0	-0.1936
Pax5	10	0.22339	0.5303	0.999995	306	5	-0.013607	0.4846	0.48238	0.999995	316	0	-0.013607
Sirt2	11	0.22758	0.54882	0.999995	307	7	-0.06372	0.14326	0.14385	0.999995	82	0	-0.06372
Ash1l	11	0.22785	0.54918	0.999995	308	7	-0.14276	0.56233	0.56247	0.999995	364	0	-0.14276
Ing5	11	0.23055	0.55336	0.999995	309	5	0.10694	0.93491	0.93391	0.999995	630	0	0.10694
Setd7	11	0.23258	0.55613	0.999995	310	6	-0.10238	0.79885	0.7988	0.999995	530	0	-0.10238
Havcr2	9	0.23592	0.53937	0.999995	311	3	0.14152	0.23185	0.23291	0.999995	133	0	0.14152
Chmp4c	11	0.23731	0.56262	0.999995	312	7	-0.073514	0.61467	0.61425	0.999995	404	0	-0.073514
Phf13	11	0.23758	0.56312	0.999995	313	6	-0.075482	0.84518	0.84515	0.999995	559	0	-0.075482
Hdgfl1	10	0.24036	0.55247	0.999995	314	3	0.19926	0.63979	0.63808	0.999995	428	0	0.19926
Ezh1	11	0.24235	0.57009	0.999995	315	6	-0.042108	0.34228	0.34279	0.999995	204	0	-0.042108
Adora2b	9	0.25076	0.56073	0.999995	316	4	0.0067308	0.94699	0.94694	0.999995	642	0	0.0067308
Gm11127	9	0.25128	0.56141	0.999995	317	4	0.18612	0.44586	0.44646	0.999995	282	0	0.18612
Hif1an	11	0.25196	0.5832	0.999995	318	7	-0.054323	0.56896	0.56886	0.999995	368	0	-0.054323
Ncoa3	10	0.25224	0.56761	0.999995	319	6	-0.082195	0.86434	0.86328	0.999995	574	0	-0.082195
Zmynd8	11	0.25402	0.58584	0.999995	320	6	-0.11197	0.85229	0.8523	0.999995	566	0	-0.11197
Tap2	10	0.25467	0.57081	0.999995	321	6	-0.056198	0.013426	0.013404	0.885873	11	1	-0.056198
Rcor2	11	0.25561	0.58769	0.999995	322	6	-0.14757	0.0091601	0.0089705	0.790967	8	1	-0.14757
Smad2	8	0.25984	0.54782	0.999995	323	5	-0.062042	0.93666	0.9368	0.999995	636	0	-0.062042
Il13	10	0.2601	0.57702	0.999995	324	6	-0.061824	0.97057	0.96976	0.999995	669	0	-0.061824
Ciita	11	0.26037	0.59409	0.999995	325	7	-0.059494	0.80725	0.80775	0.999995	534	0	-0.059494
Wnk1	9	0.26155	0.57379	0.999995	326	4	0.18145	0.43341	0.43441	0.999995	268	0	0.18145
Csf2	10	0.26201	0.57936	0.999995	327	6	-0.030956	0.93838	0.9379	0.999995	639	0	-0.030956
Ing4	9	0.26374	0.57595	0.999995	328	3	0.088769	0.57366	0.57428	0.999995	372	0	0.088769
Rsf1	11	0.26378	0.59838	0.999995	329	7	-0.059759	0.68282	0.68265	0.999995	452	0	-0.059759
Nsd1	10	0.26421	0.58229	0.999995	330	6	-0.11416	0.92803	0.92749	0.999995	621	0	-0.11416
Prmt2	10	0.265	0.58331	0.999995	331	5	0.014892	0.81147	0.8103	0.999995	537	0	0.014892
Kdm5d	11	0.26835	0.60414	0.999995	332	7	-0.056363	0.84621	0.84617	0.999995	561	0	-0.056363
Jak2	10	0.26886	0.58777	0.999995	333	6	-0.044466	0.057018	0.057608	0.999995	34	0	-0.044466
Glyr1	10	0.26899	0.58784	0.999995	334	5	0.012291	0.041033	0.040607	0.999995	26	0	0.012291
Kir3dl2	8	0.26931	0.56001	0.999995	335	4	0.014515	0.91691	0.91699	0.999995	610	0	0.014515
Smyd2	10	0.27113	0.59004	0.999995	336	6	-0.15576	0.98859	0.98826	0.999995	693	0	-0.15576
Mllt6	10	0.27325	0.59261	0.999995	337	5	0.084865	0.87182	0.87124	0.999995	583	0	0.084865
L3mbtl4	6	0.27411	0.53047	0.999995	338	2	0.11697	0.91031	0.91057	0.999995	607	0	0.11697
Smarca2	6	0.27492	0.53138	0.999995	339	2	0.07122	0.8381	0.83681	0.999995	555	0	0.07122
Scml2	8	0.27523	0.5674	0.999995	340	5	-0.080671	0.58798	0.58818	0.999995	382	0	-0.080671
Psma3	6	0.27561	0.53237	0.999995	341	3	-0.021173	0.34999	0.3484	0.999995	212	0	-0.021173
Flt1	10	0.278	0.59857	0.999995	342	5	-0.010091	0.58271	0.58161	0.999995	380	0	-0.010091
Kdm5b	11	0.27872	0.61662	0.999995	343	6	-0.043823	0.86813	0.868	0.999995	579	0	-0.043823
Phf2	11	0.28024	0.61843	0.999995	344	5	0.054109	0.60261	0.60201	0.999995	396	0	0.054109
Baz1b	10	0.28124	0.60243	0.999995	345	5	-0.092241	0.63044	0.62857	0.999995	418	0	-0.092241
Hmgn5	9	0.28164	0.59378	0.999995	346	4	0.14781	0.09581	0.095539	0.999995	53	0	0.14781
Smyd5	10	0.28378	0.60526	0.999995	347	6	-0.12006	0.3938	0.3922	0.999995	241	0	-0.12006
Tnfrsf14	10	0.28448	0.60606	0.999995	348	5	0.025414	0.79664	0.79562	0.999995	527	0	0.025414
Tada3	11	0.28572	0.62382	0.999995	349	6	-0.0015041	0.36325	0.36383	0.999995	224	0	-0.0015041
Tdrkh	10	0.28663	0.60855	0.999995	350	6	-0.035765	0.97977	0.97922	0.999995	682	0	-0.035765
Myb	10	0.28674	0.60869	0.999995	351	3	0.010664	0.89052	0.8903	0.999995	597	0	0.010664
Kdm7a	6	0.28955	0.54925	0.999995	352	2	0.1916	0.46591	0.464	0.999995	305	0	0.1916
Smyd1	10	0.29006	0.61274	0.999995	353	5	0.01825	0.39544	0.39377	0.999995	243	0	0.01825
Cd86	10	0.29006	0.61275	0.999995	354	6	-0.055226	0.93417	0.93352	0.999995	628	0	-0.055226
Tdrd9	11	0.29175	0.62981	0.999995	355	5	0.0060211	0.96987	0.96961	0.999995	667	0	0.0060211
Vdac1	9	0.29364	0.60598	0.999995	356	4	0.2046	0.5058	0.50727	0.999995	329	0	0.2046
Adora3	6	0.29409	0.55477	0.999995	357	3	-0.015921	0.56983	0.56705	0.999995	369	0	-0.015921
Tdrd1	11	0.29803	0.63585	0.999995	358	6	-0.049172	0.7556	0.75515	0.999995	503	0	-0.049172
Mllt3	6	0.29979	0.56148	0.999995	359	4	-0.041851	0.86928	0.86838	0.999995	581	0	-0.041851
Zfp57	10	0.30128	0.62609	0.999995	360	4	0.31118	0.53856	0.53722	0.999995	349	0	0.31118
Brdt	11	0.30256	0.64036	0.999995	361	4	0.019914	0.13586	0.13584	0.999995	78	0	0.019914
Cbx8	10	0.30321	0.62832	0.999995	362	5	0.050374	0.46661	0.46413	0.999995	306	0	0.050374
Atrx	11	0.30764	0.64525	0.999995	363	5	0.0049658	0.83197	0.83179	0.999995	548	0	0.0049658
Brpf3	9	0.30878	0.62126	0.999995	364	4	0.19535	0.67199	0.67312	0.999995	446	0	0.19535
Grhl1	10	0.31052	0.6361	0.999995	365	5	-0.030298	0.11051	0.11024	0.999995	66	0	-0.030298
Scmh1	10	0.31144	0.63704	0.999995	366	5	0.083483	0.8609	0.85979	0.999995	571	0	0.083483
Cbx6	10	0.31159	0.63717	0.999995	367	5	0.0023486	0.92139	0.92061	0.999995	613	0	0.0023486
Chd1l	10	0.31757	0.64406	0.999995	368	5	0.049872	0.015965	0.015907	0.915606	12	1	0.049872
H2-Q2	10	0.31885	0.64546	0.999995	369	5	-0.067425	0.60556	0.60393	0.999995	398	0	-0.067425
Vtcn1	10	0.31948	0.64611	0.999995	370	3	0.072449	0.5599	0.55849	0.999995	362	0	0.072449
Lbr	10	0.32071	0.64746	0.999995	371	5	-0.012244	0.47025	0.46763	0.999995	309	0	-0.012244
Mr1	10	0.32084	0.64755	0.999995	372	6	-0.092033	0.84713	0.84632	0.999995	563	0	-0.092033
Cbx4	10	0.32227	0.64922	0.999995	373	5	0.0061864	0.052125	0.052433	0.999995	32	0	0.0061864
Smc1b	11	0.32293	0.65967	0.999995	374	5	0.012648	0.81071	0.8109	0.999995	535	0	0.012648
H2-T23	10	0.32372	0.65085	0.999995	375	5	-0.029245	0.91874	0.91792	0.999995	611	0	-0.029245
Chaf1a	8	0.32383	0.62374	0.999995	376	5	-0.14685	0.25395	0.25268	0.999995	148	0	-0.14685
Hemk1	10	0.32414	0.65146	0.999995	377	6	-0.028136	0.26092	0.25885	0.999995	153	0	-0.028136
Hdgfrp2	10	0.33111	0.65942	0.999995	378	4	0.13629	0.029825	0.02989	0.999995	19	0	0.13629
Stat1	11	0.33124	0.66722	0.999995	379	5	0.15628	0.19002	0.19049	0.999995	108	0	0.15628
Nfkb2	11	0.33225	0.66793	0.999995	380	4	0.05744	0.81472	0.8148	0.999995	539	0	0.05744
Gatad2a	11	0.33397	0.66956	0.999995	381	4	0.13147	0.24327	0.24387	0.999995	141	0	0.13147
Ing2	11	0.33443	0.66995	0.999995	382	6	-0.091436	0.29744	0.2986	0.999995	181	0	-0.091436
Hdgfrp3	10	0.33835	0.66745	0.999995	383	5	0.017228	0.93271	0.93208	0.999995	626	0	0.017228
Snd1	11	0.33889	0.67395	0.999995	384	4	0.059033	0.38995	0.38979	0.999995	238	0	0.059033
Supt3	6	0.34038	0.60996	0.999995	385	4	-0.034357	0.60023	0.59785	0.999995	393	0	-0.034357
Baz2b	10	0.34363	0.67308	0.999995	386	5	0.024579	0.27741	0.2751	0.999995	162	0	0.024579
Ccdc79	11	0.34575	0.68057	0.999995	387	6	-0.029651	0.61881	0.61855	0.999995	407	0	-0.029651
Vegfb	9	0.35302	0.66345	0.999995	388	4	0.014256	0.89177	0.89204	0.999995	599	0	0.014256
Gfi1b	9	0.35406	0.66432	0.999995	389	4	0.10877	0.31625	0.31716	0.999995	190	0	0.10877
Hif1a	11	0.35437	0.68859	0.999995	390	4	0.18746	0.92167	0.92093	0.999995	614	0	0.18746
Ptger2	10	0.35457	0.68514	0.999995	391	4	0.073831	0.91377	0.91285	0.999995	609	0	0.073831
Pwwp2b	9	0.36733	0.67653	0.999995	392	2	0.15104	0.37117	0.37139	0.999995	231	0	0.15104
Cbx1	10	0.36781	0.69855	0.999995	393	6	-0.15887	0.10354	0.10311	0.999995	60	0	-0.15887
Gmeb1	10	0.36818	0.69887	0.999995	394	4	0.0022917	0.7811	0.77943	0.999995	520	0	0.0022917
Smarcd2	10	0.36893	0.69977	0.999995	395	5	0.0025634	0.35415	0.35245	0.999995	215	0	0.0025634
Tdrd5	10	0.36991	0.7007	0.999995	396	4	0.095628	0.63254	0.63063	0.999995	421	0	0.095628
Brwd3	10	0.37055	0.7013	0.999995	397	5	0.0041734	0.048441	0.048791	0.999995	28	0	0.0041734
Cml1	9	0.37117	0.68023	0.999995	398	3	0.074571	0.17022	0.17173	0.999995	96	0	0.074571
Jade2	6	0.37195	0.63357	0.999995	399	3	0.10583	0.52396	0.52128	0.999995	340	0	0.10583
Mum1	10	0.37314	0.70407	0.999995	400	5	-0.034913	0.084712	0.084268	0.999995	46	0	-0.034913
Epas1	11	0.37315	0.70604	0.999995	401	4	0.18672	0.51984	0.52034	0.999995	336	0	0.18672
Fto	10	0.37345	0.70445	0.999995	402	3	0.14026	0.62992	0.62815	0.999995	417	0	0.14026
Mbd4	9	0.3757	0.68434	0.999995	403	4	0.076191	0.15639	0.15728	0.999995	90	0	0.076191
Satl1	11	0.37573	0.70866	0.999995	404	6	-0.011424	0.3735	0.3737	0.999995	233	0	-0.011424
Caprin2	10	0.37664	0.70771	0.999995	405	6	-0.025358	0.97708	0.97658	0.999995	680	0	-0.025358
L3mbtl1	10	0.37898	0.7095	0.999995	406	5	-0.0061448	0.50204	0.50039	0.999995	326	0	-0.0061448
Tcf3	11	0.37956	0.71213	0.999995	407	6	-0.02878	0.96622	0.96593	0.999995	663	0	-0.02878
Tcf20	11	0.38269	0.71478	0.999995	408	6	-0.0094419	0.83775	0.83745	0.999995	554	0	-0.0094419
Nap1l2	10	0.38306	0.71257	0.999995	409	5	0.11978	0.17001	0.1683	0.999995	95	0	0.11978
Kmt2b	5	0.38384	0.61285	0.999995	410	2	0.049998	0.41757	0.41724	0.999995	258	0	0.049998
Setd3	9	0.38737	0.69489	0.999995	411	5	-0.017747	0.33178	0.33261	0.999995	199	0	-0.017747
Cramp1l	11	0.38768	0.71903	0.999995	412	5	0.057439	0.15548	0.15623	0.999995	89	0	0.057439
Kdm6b	11	0.3877	0.71904	0.999995	413	4	0.16448	0.2311	0.2314	0.999995	132	0	0.16448
H2-DMb2	10	0.38938	0.71724	0.999995	414	5	-0.026625	0.42581	0.42324	0.999995	264	0	-0.026625
Tapbp	11	0.3907	0.72149	0.999995	415	5	0.058533	0.19584	0.19603	0.999995	111	0	0.058533
Cxcl12	9	0.3913	0.69868	0.999995	416	5	-0.0030969	0.18386	0.18542	0.999995	104	0	-0.0030969
Kmt2a	6	0.3955	0.65127	0.999995	417	3	0.11012	0.7431	0.74177	0.999995	495	0	0.11012
H2-Q4	9	0.40046	0.70738	0.999995	418	4	0.13645	0.2825	0.28322	0.999995	167	0	0.13645
Glt28d2	9	0.40453	0.71081	0.999995	419	5	-0.14133	0.63595	0.63709	0.999995	424	0	-0.14133
Tnfrsf9	11	0.40482	0.73473	0.999995	420	2	0.33121	0.16394	0.16436	0.999995	92	0	0.33121
Piwil4	11	0.41287	0.74154	0.999995	421	5	0.046246	0.92374	0.92299	0.999995	617	0	0.046246
Zcwpw1	11	0.41319	0.74176	0.999995	422	6	-0.011875	0.5983	0.59783	0.999995	392	0	-0.011875
Pdcd1lg2	11	0.41543	0.74376	0.999995	423	4	0.16874	0.85452	0.85468	0.999995	567	0	0.16874
Mecom	9	0.41569	0.72091	0.999995	424	5	-0.014781	0.64574	0.64696	0.999995	429	0	-0.014781
Prkab2	10	0.41596	0.73586	0.999995	425	5	0.019163	0.54872	0.54756	0.999995	353	0	0.019163
Setd6	11	0.41626	0.7446	0.999995	426	6	-0.04468	0.67117	0.6704	0.999995	444	0	-0.04468
Chd3	11	0.41669	0.74494	0.999995	427	6	-0.039535	0.33255	0.3334	0.999995	200	0	-0.039535
Satb2	10	0.41706	0.73674	0.999995	428	5	0.0005704	0.64892	0.64658	0.999995	431	0	0.0005704
Fxyd1	10	0.41805	0.73734	0.999995	429	5	0.032103	0.3679	0.36604	0.999995	230	0	0.032103
Il12a	7	0.41912	0.69443	0.999995	430	4	-0.038951	0.85145	0.85213	0.999995	564	0	-0.038951
Arg1	11	0.41968	0.74744	0.999995	431	6	-0.014595	0.46487	0.46587	0.999995	303	0	-0.014595
Hltf	11	0.4255	0.75258	0.999995	432	6	-0.08507	0.35854	0.35904	0.999995	220	0	-0.08507
Trim24	11	0.4265	0.75343	0.999995	433	4	0.28992	0.042325	0.043438	0.999995	27	0	0.28992
Slc25a15	11	0.42682	0.75383	0.999995	434	3	0.078994	0.28502	0.28583	0.999995	169	0	0.078994
Phf20	9	0.42731	0.73075	0.999995	435	4	0.012462	0.67541	0.67649	0.999995	447	0	0.012462
Phf20l1	10	0.42767	0.74428	0.999995	436	5	-0.011212	0.46515	0.46281	0.999995	304	0	-0.011212
Jmjd7	10	0.42892	0.74519	0.999995	437	4	0.1129	0.25896	0.25693	0.999995	151	0	0.1129
Alkbh1	11	0.43065	0.75687	0.999995	438	6	-0.16269	0.39713	0.39726	0.999995	245	0	-0.16269
Jak1	11	0.43293	0.75865	0.999995	439	5	0.037568	0.98661	0.98691	0.999995	690	0	0.037568
Ereg	9	0.43476	0.73727	0.999995	440	3	0.063251	0.76824	0.76858	0.999995	514	0	0.063251
Arid1b	10	0.44121	0.75393	0.999995	441	3	0.34486	0.30386	0.30196	0.999995	185	0	0.34486
Ccl12	7	0.44544	0.71817	0.999995	442	3	0.065801	0.62509	0.62675	0.999995	412	0	0.065801
H2-Bl	6	0.44562	0.68899	0.999995	443	3	0.095559	0.33859	0.33729	0.999995	201	0	0.095559
Nap1l3	10	0.44794	0.75867	0.999995	444	4	0.10443	0.46	0.45776	0.999995	298	0	0.10443
Npcd	6	0.44828	0.69097	0.999995	445	3	0.0015708	0.34404	0.34264	0.999995	206	0	0.0015708
Jade1	6	0.44856	0.69118	0.999995	446	3	-0.035829	0.23444	0.23395	0.999995	135	0	-0.035829
Ccnt1	11	0.45156	0.7738	0.999995	447	6	-0.14819	0.86218	0.86202	0.999995	573	0	-0.14819
Cxcl10	10	0.45215	0.76163	0.999995	448	5	0.0108	0.61384	0.61204	0.999995	403	0	0.0108
Stat3	11	0.45275	0.77464	0.999995	449	4	0.12097	0.79786	0.79791	0.999995	529	0	0.12097
Prdm6	11	0.45308	0.77496	0.999995	450	6	-0.088815	0.67014	0.6694	0.999995	443	0	-0.088815
Tdrd12	9	0.45355	0.75365	0.999995	451	5	-0.1865	0.29702	0.29789	0.999995	179	0	-0.1865
Phc1	9	0.45528	0.75537	0.999995	452	5	-0.013196	0.97563	0.97585	0.999995	677	0	-0.013196
Braf	9	0.45543	0.75546	0.999995	453	4	0.012287	0.63642	0.63746	0.999995	425	0	0.012287
Gzmn	9	0.45673	0.75656	0.999995	454	3	0.16463	0.71102	0.71268	0.999995	473	0	0.16463
Suv420h2	9	0.4573	0.75701	0.999995	455	4	0.0044551	0.66285	0.66377	0.999995	438	0	0.0044551
Cd28	11	0.46009	0.78031	0.999995	456	5	0.0098505	0.43949	0.44038	0.999995	272	0	0.0098505
Lag3	10	0.46163	0.76785	0.999995	457	4	0.08595	0.47962	0.47723	0.999995	312	0	0.08595
Dpf3	11	0.46414	0.7834	0.999995	458	5	0.046702	0.10692	0.10699	0.999995	63	0	0.046702
Phf11c	6	0.46492	0.70298	0.999995	459	3	-0.051144	0.098724	0.09926	0.999995	57	0	-0.051144
Arnt2	6	0.46553	0.70344	0.999995	460	3	-0.044853	0.6151	0.61318	0.999995	405	0	-0.044853
Cd80	11	0.46591	0.78473	0.999995	461	6	-0.0080287	0.34614	0.34669	0.999995	210	0	-0.0080287
Hdac1	8	0.46683	0.74526	0.999995	462	3	0.086639	0.93073	0.9308	0.999995	625	0	0.086639
Mllt10	10	0.46821	0.77231	0.999995	463	5	0.01664	0.24109	0.23932	0.999995	139	0	0.01664
Nat14	11	0.46851	0.78674	0.999995	464	4	0.46419	0.25201	0.25255	0.999995	147	0	0.46419
Brwd1	9	0.46995	0.76726	0.999995	465	5	-0.11329	0.74415	0.7454	0.999995	496	0	-0.11329
Dpep2	11	0.47125	0.78888	0.999995	466	3	0.3191	0.45108	0.45242	0.999995	289	0	0.3191
Setd1b	6	0.4731	0.70908	0.999995	467	3	0.031827	0.74901	0.74788	0.999995	498	0	0.031827
Tnfsf9	11	0.47552	0.79226	0.999995	468	4	0.12846	0.71374	0.71349	0.999995	476	0	0.12846
Whsc1l1	9	0.47816	0.77396	0.999995	469	5	-0.093271	0.59072	0.59123	0.999995	384	0	-0.093271
H2-Q10	8	0.47872	0.75423	0.999995	470	3	0.12824	0.84188	0.84149	0.999995	557	0	0.12824
Dpf1	10	0.47874	0.77966	0.999995	471	5	-0.018042	0.76762	0.76614	0.999995	512	0	-0.018042
Nkx2-1	11	0.47927	0.79516	0.999995	472	5	0.1379	0.12338	0.12366	0.999995	72	0	0.1379
Pcgf6	11	0.47946	0.7953	0.999995	473	6	-0.1211	0.86449	0.86437	0.999995	576	0	-0.1211
Prdm1	11	0.47991	0.79563	0.999995	474	4	0.058207	0.59083	0.59043	0.999995	385	0	0.058207
4632428N05Rik	11	0.48541	0.79971	0.999995	475	3	0.27201	0.88678	0.88697	0.999995	593	0	0.27201
Brd3	11	0.4879	0.80172	0.999995	476	4	0.040913	0.95666	0.95653	0.999995	652	0	0.040913
Atf7ip	10	0.48957	0.78746	0.999995	477	4	0.18753	0.28696	0.28447	0.999995	171	0	0.18753
Nat8l	9	0.49255	0.78504	0.999995	478	4	0.0037717	0.79684	0.79717	0.999995	528	0	0.0037717
Mier3	9	0.49387	0.78617	0.999995	479	4	0.082113	0.78356	0.78336	0.999995	522	0	0.082113
Kdm4c	11	0.49464	0.80671	0.999995	480	5	0.22239	0.35569	0.35629	0.999995	217	0	0.22239
Ncor2	10	0.49691	0.79247	0.999995	481	4	0.15087	0.092994	0.092471	0.999995	50	0	0.15087
Ints12	10	0.49697	0.79254	0.999995	482	5	-0.068857	0.45926	0.45711	0.999995	297	0	-0.068857
Cdyl	11	0.49748	0.80917	0.999995	483	5	0.059644	0.013362	0.013117	0.885873	10	1	0.059644
Pygo1	11	0.49756	0.80923	0.999995	484	6	-0.01422	0.76259	0.76215	0.999995	508	0	-0.01422
Map2k2	10	0.49965	0.79444	0.999995	485	4	0.14002	0.36363	0.36173	0.999995	225	0	0.14002
Chd4	11	0.50236	0.8119	0.999995	486	4	0.1298	0.049106	0.050434	0.999995	29	0	0.1298
Gm8909	11	0.50468	0.8131	0.999995	487	5	0.022997	0.094072	0.093906	0.999995	51	0	0.022997
Asxl1	11	0.50668	0.81422	0.999995	488	5	0.06223	0.44449	0.4453	0.999995	280	0	0.06223
Smad1	11	0.50934	0.81572	0.999995	489	3	0.25468	0.0077559	0.007783	0.790967	7	1	0.25468
Smarcal1	10	0.5109	0.80194	0.999995	490	3	0.21059	0.62675	0.6253	0.999995	413	0	0.21059
Sin3b	9	0.51176	0.79753	0.999995	491	4	0.28302	0.87167	0.87122	0.999995	582	0	0.28302
Cbx5	8	0.51242	0.7778	0.999995	492	1	0.36704	0.11657	0.11658	0.999995	68	0	0.36704
Tcf19	11	0.51299	0.8176	0.999995	493	4	0.097643	0.36418	0.36476	0.999995	226	0	0.097643
Mgmt	11	0.51339	0.81783	0.999995	494	5	0.16138	0.3207	0.32159	0.999995	192	0	0.16138
Fos	10	0.51428	0.80386	0.999995	495	3	0.049136	0.57503	0.57406	0.999995	374	0	0.049136
H2-Oa	10	0.51786	0.80639	0.999995	496	5	-0.024582	0.28601	0.2837	0.999995	170	0	-0.024582
Nap1l4	10	0.5202	0.80782	0.999995	497	5	0.0057439	0.4986	0.49643	0.999995	324	0	0.0057439
Stat2	11	0.52099	0.82225	0.999995	498	5	0.35907	0.45842	0.45925	0.999995	295	0	0.35907
Psmb10	10	0.52753	0.81264	0.999995	499	5	0.10183	0.12773	0.12707	0.999995	74	0	0.10183
Kdm5c	11	0.52899	0.82672	0.999995	500	3	0.39882	0.14203	0.14257	0.999995	81	0	0.39882
Cd70	11	0.52995	0.82736	0.999995	501	2	0.34074	0.27028	0.27105	0.999995	159	0	0.34074
H2-Eb1	10	0.53228	0.81554	0.999995	502	4	0.10068	0.69904	0.69773	0.999995	464	0	0.10068
Hdac9	11	0.53485	0.82987	0.999995	503	5	0.010614	0.6778	0.67757	0.999995	450	0	0.010614
Map2k1	9	0.53589	0.81076	0.999995	504	3	0.18414	0.37423	0.37455	0.999995	234	0	0.18414
Nap1l1	8	0.53699	0.79499	0.999995	505	4	-0.042368	0.30268	0.30225	0.999995	184	0	-0.042368
Ccl5	9	0.53997	0.81285	0.999995	506	3	0.10297	0.5027	0.504	0.999995	327	0	0.10297
Prdm14	11	0.5401	0.83238	0.999995	507	5	0.080067	0.75521	0.75478	0.999995	501	0	0.080067
Smarcad1	10	0.54551	0.82418	0.999995	508	4	0.22571	0.39789	0.39576	0.999995	246	0	0.22571
Nt5e	10	0.54598	0.82452	0.999995	509	5	0.17852	0.55247	0.55081	0.999995	357	0	0.17852
Trim66	10	0.54809	0.82585	0.999995	510	3	0.038329	0.49374	0.49161	0.999995	322	0	0.038329
Ctla4	9	0.55004	0.81795	0.999995	511	4	0.22237	0.57583	0.57659	0.999995	375	0	0.22237
Dscam	11	0.55092	0.83843	0.999995	512	5	0.014207	0.42168	0.42225	0.999995	263	0	0.014207
Jmjd1c	11	0.55357	0.84007	0.999995	513	5	0.048405	0.065203	0.065624	0.999995	37	0	0.048405
Cd4	10	0.5599	0.83358	0.999995	514	3	0.22288	0.032326	0.032166	0.999995	22	0	0.22288
Phf1	10	0.56109	0.8343	0.999995	515	4	0.048114	0.53405	0.53266	0.999995	345	0	0.048114
Ednrb	11	0.56224	0.84475	0.999995	516	4	0.14017	0.6907	0.69052	0.999995	461	0	0.14017
Sirt4	11	0.5626	0.84502	0.999995	517	4	0.12734	0.44614	0.44698	0.999995	283	0	0.12734
Phf21b	10	0.56359	0.83593	0.999995	518	5	0.0016102	0.5977	0.59653	0.999995	391	0	0.0016102
Ptprc	6	0.56522	0.77627	0.999995	519	1	0.18436	0.50794	0.50578	0.999995	331	0	0.18436
2610002M06Rik	8	0.56568	0.81481	0.999995	520	2	0.10844	0.68439	0.68541	0.999995	454	0	0.10844
Tdrd7	10	0.56753	0.83864	0.999995	521	5	0.052203	0.87223	0.87159	0.999995	584	0	0.052203
Ing1	11	0.57028	0.8493	0.999995	522	5	0.04369	0.11456	0.11484	0.999995	67	0	0.04369
Smarca1	11	0.57033	0.84932	0.999995	523	5	0.12108	0.57028	0.57011	0.999995	370	0	0.12108
Tyw5	6	0.57049	0.78043	0.999995	524	3	-0.043598	0.417	0.41449	0.999995	257	0	-0.043598
Phc3	10	0.57237	0.84196	0.999995	525	5	0.11216	0.78916	0.78761	0.999995	524	0	0.11216
Kmt2e	6	0.57779	0.78557	0.999995	526	2	0.51143	0.074388	0.074718	0.999995	40	0	0.51143
Aire	9	0.57923	0.83327	0.999995	527	3	0.22504	0.53414	0.53505	0.999995	346	0	0.22504
Hdac8	8	0.58517	0.82758	0.999995	528	3	0.34972	0.4419	0.44178	0.999995	276	0	0.34972
Prkaa1	9	0.58823	0.83809	0.999995	529	4	0.14386	0.88635	0.88675	0.999995	592	0	0.14386
Epc1	9	0.59176	0.83994	0.999995	530	4	0.15213	0.41354	0.4142	0.999995	255	0	0.15213
Mfge8	11	0.59209	0.86037	0.999995	531	3	0.30229	0.68776	0.68757	0.999995	457	0	0.30229
Btla	10	0.59327	0.85522	0.999995	532	5	0.011051	0.43203	0.42919	0.999995	267	0	0.011051
Angpt2	10	0.59597	0.85682	0.999995	533	4	0.033723	0.83674	0.83577	0.999995	553	0	0.033723
Il10	9	0.59726	0.84276	0.999995	534	4	0.052849	0.58598	0.58675	0.999995	381	0	0.052849
Lgals9	11	0.59801	0.86342	0.999995	535	5	0.019214	0.92682	0.92585	0.999995	620	0	0.019214
Tnfsf4	11	0.60077	0.86489	0.999995	536	5	0.14364	0.41823	0.4189	0.999995	259	0	0.14364
Ctnnb1	8	0.60338	0.83965	0.999995	537	3	0.28547	0.26738	0.26612	0.999995	156	0	0.28547
Sirt6	9	0.60605	0.84743	0.999995	538	3	0.023872	0.71824	0.71981	0.999995	480	0	0.023872
Kalrn	10	0.60944	0.8653	0.999995	539	3	0.2535	0.52688	0.52534	0.999995	343	0	0.2535
Prkab1	9	0.61184	0.85051	0.999995	540	3	0.35954	0.62786	0.62888	0.999995	415	0	0.35954
Prmt8	9	0.61191	0.85055	0.999995	541	3	0.11219	0.16826	0.16981	0.999995	94	0	0.11219
Klrk1	9	0.61227	0.85071	0.999995	542	4	0.084758	0.92354	0.92366	0.999995	616	0	0.084758
Phc2	6	0.61405	0.8119	0.999995	543	3	0.015193	0.097308	0.097746	0.999995	55	0	0.015193
Setd5	11	0.61407	0.8715	0.999995	544	2	0.049124	0.12464	0.12464	0.999995	73	0	0.049124
Rab33b	10	0.6141	0.86824	0.999995	545	4	0.16163	0.55185	0.55023	0.999995	355	0	0.16163
Arg2	10	0.6179	0.87054	0.999995	546	2	0.2955	0.51628	0.51455	0.999995	334	0	0.2955
Il6	9	0.61899	0.85453	0.999995	547	4	0.096081	0.37804	0.37823	0.999995	236	0	0.096081
Morf4l1	9	0.61918	0.85459	0.999995	548	3	0.018672	0.14638	0.14738	0.999995	83	0	0.018672
Chmp1b	6	0.61941	0.81536	0.999995	549	3	-0.02393	0.76699	0.76579	0.999995	511	0	-0.02393
Prdm2	10	0.62088	0.8722	0.999995	550	3	0.25477	0.27549	0.27295	0.999995	161	0	0.25477
Padi4	10	0.62329	0.87343	0.999995	551	4	0.089725	0.88803	0.88794	0.999995	594	0	0.089725
Sirt5	10	0.62516	0.87427	0.999995	552	4	0.14053	0.93593	0.93535	0.999995	633	0	0.14053
Stat6	11	0.62546	0.87723	0.999995	553	4	0.13172	0.63498	0.63423	0.999995	423	0	0.13172
Mbd1	10	0.62675	0.87492	0.999995	554	3	0.10496	0.4688	0.46612	0.999995	308	0	0.10496
Areg	9	0.63054	0.86075	0.999995	555	3	0.14865	0.68466	0.68633	0.999995	455	0	0.14865
Prmt3	10	0.63566	0.87843	0.999995	556	2	0.17416	0.31948	0.31758	0.999995	191	0	0.17416
Rnf2	11	0.63618	0.88246	0.999995	557	4	0.11521	0.83856	0.83835	0.999995	556	0	0.11521
Zmynd11	10	0.63798	0.87948	0.999995	558	4	0.28212	0.12887	0.12806	0.999995	76	0	0.28212
Prdm5	9	0.6394	0.8653	0.999995	559	4	0.044312	0.030268	0.029692	0.999995	20	0	0.044312
Cdyl2	9	0.64207	0.86647	0.999995	560	4	0.024567	0.53531	0.53628	0.999995	347	0	0.024567
H2-Aa	10	0.64406	0.8818	0.999995	561	4	0.064618	0.43434	0.43156	0.999995	269	0	0.064618
Kdm6a	11	0.64504	0.88693	0.999995	562	4	0.21959	0.038236	0.03938	0.999995	24	0	0.21959
Ring1	10	0.64738	0.88295	0.999995	563	4	0.11537	0.93064	0.93017	0.999995	624	0	0.11537
Ube2e1	10	0.65197	0.88477	0.999995	564	4	0.11419	0.32853	0.32679	0.999995	195	0	0.11419
Sfmbt2	9	0.65507	0.87355	0.999995	565	3	0.21895	0.48243	0.48325	0.999995	313	0	0.21895
Kdm2a	11	0.65515	0.89154	0.999995	566	5	0.062904	0.32268	0.32359	0.999995	193	0	0.062904
Grn	10	0.65621	0.88646	0.999995	567	4	0.19706	0.41875	0.41619	0.999995	260	0	0.19706
Nf2	11	0.65966	0.89368	0.999995	568	1	2.5661	0.0002161	0.00044036	0.320144	1	2	2.5661
Lef1	10	0.6598	0.88792	0.999995	569	3	0.19767	0.36705	0.3651	0.999995	229	0	0.19767
Traf7	6	0.66074	0.84375	0.999995	570	2	0.34675	0.36441	0.36244	0.999995	227	0	0.34675
Smyd4	10	0.66138	0.88861	0.999995	571	4	0.05056	0.67741	0.67624	0.999995	449	0	0.05056
Kdm4a	10	0.66368	0.88949	0.999995	572	3	0.17613	0.031076	0.031018	0.999995	21	0	0.17613
Kdm3a	11	0.6691	0.89873	0.999995	573	4	0.088313	0.58131	0.58102	0.999995	379	0	0.088313
Slc38a1	9	0.6694	0.88103	0.999995	574	2	0.16529	0.52406	0.52539	0.999995	341	0	0.16529
Hdac2	9	0.6707	0.88177	0.999995	575	2	0.36551	0.22633	0.22729	0.999995	127	0	0.36551
Smarcd3	11	0.67105	0.89963	0.999995	576	5	0.0034438	0.67679	0.67638	0.999995	448	0	0.0034438
Trdmt1	11	0.67249	0.90029	0.999995	577	3	0.065017	0.39445	0.39465	0.999995	242	0	0.065017
Brpf1	11	0.67322	0.90064	0.999995	578	1	0.85321	0.17944	0.17992	0.999995	98	0	0.85321
Stat5b	10	0.68246	0.897	0.999995	579	4	0.074376	0.57681	0.57589	0.999995	377	0	0.074376
Prdm13	11	0.68282	0.90585	0.999995	580	3	0.29049	0.48997	0.48999	0.999995	318	0	0.29049
Cd74	9	0.68511	0.88957	0.999995	581	4	0.13398	0.63073	0.63188	0.999995	419	0	0.13398
Icosl	11	0.68687	0.90776	0.999995	582	4	0.10432	0.54396	0.54465	0.999995	350	0	0.10432
Il2	9	0.68931	0.89163	0.999995	583	4	0.067456	0.59696	0.59743	0.999995	390	0	0.067456
Gm7030	9	0.69083	0.89247	0.999995	584	3	0.1207	0.73717	0.73825	0.999995	488	0	0.1207
Ppargc1a	9	0.6921	0.89305	0.999995	585	4	0.015833	0.77324	0.77365	0.999995	516	0	0.015833
Brd7	9	0.69321	0.89362	0.999995	586	4	0.10076	0.81282	0.8131	0.999995	538	0	0.10076
Phf21a	11	0.69598	0.91218	0.999995	587	3	0.23335	0.16514	0.16567	0.999995	93	0	0.23335
Mmp9	11	0.69984	0.91377	0.999995	588	4	0.25276	0.44116	0.442	0.999995	275	0	0.25276
Nhs	11	0.70266	0.91514	0.999995	589	4	0.1745	0.79385	0.79346	0.999995	526	0	0.1745
Mgea5	9	0.70504	0.89959	0.999995	590	4	0.080526	0.59281	0.59319	0.999995	387	0	0.080526
Tcf7l1	10	0.7061	0.90671	0.999995	591	3	0.1607	0.22282	0.22125	0.999995	126	0	0.1607
Cd40	9	0.70755	0.90088	0.999995	592	2	0.34005	0.23093	0.23201	0.999995	131	0	0.34005
H2-DMb1	9	0.71073	0.90241	0.999995	593	2	0.18757	0.19919	0.20012	0.999995	112	0	0.18757
Mta3	9	0.71216	0.90305	0.999995	594	3	0.1994	0.37652	0.37681	0.999995	235	0	0.1994
Ccl17	9	0.71824	0.90628	0.999995	595	2	0.070258	0.77169	0.772	0.999995	515	0	0.070258
Nat8	10	0.72261	0.9136	0.999995	596	3	0.078168	0.18082	0.17957	0.999995	99	0	0.078168
Arrb1	11	0.72877	0.92665	0.999995	597	4	0.056311	0.66231	0.66131	0.999995	436	0	0.056311
Cbx7	9	0.72958	0.91166	0.999995	598	3	0.29415	0.035887	0.035224	0.999995	23	0	0.29415
Hyal1	11	0.72966	0.92692	0.999995	599	4	0.22643	0.36042	0.36108	0.999995	222	0	0.22643
Ctcfl	10	0.73649	0.91951	0.999995	600	4	0.043485	0.33122	0.32912	0.999995	198	0	0.043485
Chd9	11	0.74162	0.93034	0.999995	601	4	0.2373	0.084976	0.085	0.999995	47	0	0.2373
Snai1	11	0.74643	0.93164	0.999995	602	4	0.10966	0.42082	0.42131	0.999995	262	0	0.10966
Cbx2	8	0.74743	0.90601	0.999995	603	3	0.11022	0.41573	0.41536	0.999995	256	0	0.11022
Dido1	11	0.74924	0.93262	0.999995	604	2	0.21659	0.80438	0.80481	0.999995	531	0	0.21659
Adora1	11	0.75188	0.9334	0.999995	605	3	0.11897	0.45436	0.45569	0.999995	292	0	0.11897
Ezh2	11	0.75254	0.93368	0.999995	606	4	0.34073	0.52633	0.52696	0.999995	342	0	0.34073
Jak3	11	0.75282	0.93373	0.999995	607	3	0.24602	0.94718	0.94658	0.999995	643	0	0.24602
Btg3	7	0.75573	0.9041	0.999995	608	2	0.13784	0.73966	0.74055	0.999995	490	0	0.13784
Hmg20b	11	0.75709	0.93515	0.999995	609	3	0.39598	0.079741	0.079953	0.999995	44	0	0.39598
Ltbr	10	0.76058	0.92849	0.999995	610	3	0.20411	0.56113	0.55972	0.999995	363	0	0.20411
H2-M3	9	0.7642	0.92558	0.999995	611	3	0.06764	0.55878	0.55973	0.999995	361	0	0.06764
Mllt1	10	0.76528	0.93036	0.999995	612	4	0.061479	0.70251	0.70118	0.999995	467	0	0.061479
Dpep3	9	0.7655	0.92601	0.999995	613	3	0.11808	0.45369	0.45413	0.999995	291	0	0.11808
Pick1	10	0.76929	0.93198	0.999995	614	4	0.27294	0.022287	0.02236	0.999995	14	0	0.27294
Smarcc2	11	0.77178	0.93949	0.999995	615	2	0.22521	0.55561	0.55604	0.999995	360	0	0.22521
Bmi1	9	0.772	0.92812	0.999995	616	3	0.37674	0.049254	0.048217	0.999995	30	0	0.37674
Mtf2	10	0.77208	0.93335	0.999995	617	2	0.28953	0.26969	0.26735	0.999995	158	0	0.28953
Vegfc	9	0.77246	0.92827	0.999995	618	3	0.15932	0.68797	0.68956	0.999995	458	0	0.15932
Kat2a	11	0.77272	0.93966	0.999995	619	3	0.14958	0.10565	0.10566	0.999995	62	0	0.14958
Atad2	10	0.77826	0.9357	0.999995	620	4	0.063169	0.29733	0.29505	0.999995	180	0	0.063169
Hdac5	11	0.77868	0.94141	0.999995	621	4	0.029816	0.77638	0.77636	0.999995	518	0	0.029816
Pcgf1	11	0.77929	0.94154	0.999995	622	3	0.4654	0.28711	0.28797	0.999995	172	0	0.4654
Cd40lg	9	0.78957	0.93351	0.999995	623	3	0.32569	0.62107	0.62197	0.999995	409	0	0.32569
Rps6ka5	10	0.79204	0.94124	0.999995	624	4	0.10212	0.76658	0.76496	0.999995	510	0	0.10212
Cd276	9	0.79952	0.93667	0.999995	625	2	0.10534	0.54918	0.55057	0.999995	354	0	0.10534
Tdrd6	11	0.8014	0.94853	0.999995	626	4	0.17722	0.20737	0.20726	0.999995	119	0	0.17722
Mybl1	11	0.80184	0.9487	0.999995	627	4	0.10921	0.74803	0.74755	0.999995	497	0	0.10921
Lrp6	11	0.80374	0.94939	0.999995	628	4	0.12247	0.45761	0.45856	0.999995	294	0	0.12247
Ubr7	10	0.80438	0.94589	0.999995	629	4	0.06578	0.29075	0.28809	0.999995	174	0	0.06578
Akap1	11	0.80452	0.94965	0.999995	630	4	0.38393	0.10052	0.10038	0.999995	58	0	0.38393
Pwwp2a	10	0.80575	0.9464	0.999995	631	4	0.10952	0.37214	0.3703	0.999995	232	0	0.10952
Tsc2	9	0.80807	0.93942	0.999995	632	1	0.70311	0.22909	0.2301	0.999995	130	0	0.70311
Wt1	10	0.80915	0.94772	0.999995	633	4	0.09183	0.80536	0.80414	0.999995	532	0	0.09183
Hmga1	6	0.81156	0.90689	0.999995	634	2	0.10006	0.88021	0.87943	0.999995	587	0	0.10006
Whsc1	10	0.81228	0.94908	0.999995	635	4	0.08329	0.48389	0.48158	0.999995	315	0	0.08329
H2-Ob	10	0.81846	0.95135	0.999995	636	4	0.11181	0.578	0.57717	0.999995	378	0	0.11181
Ube2b	9	0.82106	0.94377	0.999995	637	3	0.10645	0.34462	0.34533	0.999995	207	0	0.10645
Ube2a	11	0.82384	0.95566	0.999995	638	3	0.40443	0.040964	0.042042	0.999995	25	0	0.40443
Sirt1	11	0.82529	0.9561	0.999995	639	4	0.088152	0.82163	0.8217	0.999995	542	0	0.088152
Kat2b	11	0.82661	0.95652	0.999995	640	4	0.067492	0.68431	0.68421	0.999995	453	0	0.067492
Hira	11	0.82916	0.95726	0.999995	641	1	0.98159	0.074478	0.074916	0.999995	41	0	0.98159
Kdm1a	11	0.83057	0.95782	0.999995	642	3	0.46623	0.0049419	0.0050518	0.734532	5	1	0.46623
Chd7	11	0.83209	0.95835	0.999995	643	4	0.2005	0.54811	0.54877	0.999995	352	0	0.2005
Rcor3	6	0.83382	0.91789	0.999995	644	2	0.29314	0.68858	0.68637	0.999995	459	0	0.29314
Trerf1	6	0.83622	0.91929	0.999995	645	2	0.076782	0.55353	0.55058	0.999995	358	0	0.076782
Kir3dl1	10	0.83871	0.95771	0.999995	646	3	0.14856	0.8816	0.88113	0.999995	588	0	0.14856
Phf14	9	0.84097	0.95021	0.999995	647	3	0.046381	0.58967	0.59026	0.999995	383	0	0.046381
Cd8a	10	0.8422	0.95839	0.999995	648	3	0.29784	0.49094	0.4888	0.999995	320	0	0.29784
Tnfrsf4	9	0.84769	0.95241	0.999995	649	3	0.2206	0.21893	0.21986	0.999995	124	0	0.2206
Ncor1	9	0.84934	0.95296	0.999995	650	3	0.056416	0.35724	0.35793	0.999995	219	0	0.056416
Dnmt3l	9	0.85217	0.95404	0.999995	651	2	0.11947	0.081953	0.081388	0.999995	45	0	0.11947
Bcor	10	0.85546	0.96125	0.999995	652	3	0.26734	0.59428	0.59303	0.999995	389	0	0.26734
Ido1	10	0.85862	0.96201	0.999995	653	3	0.21348	0.1819	0.18076	0.999995	100	0	0.21348
Kat6a	6	0.86144	0.93239	0.999995	654	1	0.54191	0.24427	0.24425	0.999995	142	0	0.54191
Proc	9	0.86532	0.95862	0.999995	655	2	0.17722	0.95289	0.95257	0.999995	648	0	0.17722
Supt7l	9	0.87009	0.96041	0.999995	656	2	0.36364	0.218	0.21897	0.999995	123	0	0.36364
Nfkb1	11	0.87646	0.97195	0.999995	657	4	0.099889	0.49074	0.49069	0.999995	319	0	0.099889
Suv39h1	9	0.87859	0.96348	0.999995	658	2	0.31147	0.83199	0.83172	0.999995	549	0	0.31147
Hells	11	0.87873	0.97265	0.999995	659	4	0.1721	0.19351	0.19392	0.999995	110	0	0.1721
Mta2	10	0.88042	0.9676	0.999995	660	3	0.13779	0.80654	0.80531	0.999995	533	0	0.13779
Uhrf2	11	0.88472	0.97462	0.999995	661	4	0.0095167	0.76789	0.76725	0.999995	513	0	0.0095167
Usp22	10	0.88571	0.96889	0.999995	662	2	0.49914	0.62034	0.61894	0.999995	408	0	0.49914
Hmga1-rs1	7	0.8866	0.95053	0.999995	663	2	0.098217	0.41237	0.41337	0.999995	253	0	0.098217
Pbrm1	9	0.88714	0.96669	0.999995	664	3	0.27733	0.44655	0.44722	0.999995	284	0	0.27733
Tgfb3	10	0.88862	0.96965	0.999995	665	3	0.17945	0.76026	0.75851	0.999995	505	0	0.17945
Dxo	6	0.89097	0.94905	0.999995	666	1	0.17207	0.14985	0.15007	0.999995	85	0	0.17207
Pten	11	0.8925	0.97628	0.999995	667	2	1.2367	0.070513	0.070988	0.999995	39	0	1.2367
Gm6251	6	0.89291	0.94951	0.999995	668	1	0.18446	0.027846	0.028168	0.999995	17	0	0.18446
Hdac6	11	0.89917	0.9775	0.999995	669	3	0.18945	0.73479	0.73471	0.999995	487	0	0.18945
Irf4	10	0.90221	0.9736	0.999995	670	2	0.19565	0.21458	0.21322	0.999995	121	0	0.19565
Pcgf2	10	0.90405	0.97416	0.999995	671	3	0.24222	0.06915	0.069325	0.999995	38	0	0.24222
Jmjd8	9	0.90539	0.97312	0.999995	672	2	0.29708	0.31543	0.31634	0.999995	188	0	0.29708
Prdm8	11	0.90793	0.97913	0.999995	673	3	0.17222	0.83057	0.83056	0.999995	547	0	0.17222
H2-Ab1	10	0.90815	0.97544	0.999995	674	3	0.097887	0.21974	0.21828	0.999995	125	0	0.097887
Prmt10	10	0.91354	0.97688	0.999995	675	3	0.40623	0.13904	0.13796	0.999995	80	0	0.40623
Mapk3	11	0.91637	0.98076	0.999995	676	3	0.12351	0.85205	0.8521	0.999995	565	0	0.12351
Setmar	11	0.91722	0.98091	0.999995	677	3	0.13209	0.12839	0.12829	0.999995	75	0	0.13209
Paxip1	9	0.91767	0.97575	0.999995	678	2	0.285	0.46009	0.46046	0.999995	300	0	0.285
Pml	11	0.92153	0.98167	0.999995	679	1	0.24291	0.8283	0.82822	0.999995	546	0	0.24291
Thbs1	9	0.92541	0.97713	0.999995	680	1	0.075627	0.22818	0.22916	0.999995	129	0	0.075627
Fbxw7	11	0.93634	0.98518	0.999995	681	3	0.27826	0.49303	0.49293	0.999995	321	0	0.27826
H2-D1	9	0.94026	0.98016	0.999995	682	1	0.16624	0.60158	0.60201	0.999995	395	0	0.16624
Taf6l	9	0.94194	0.98059	0.999995	683	1	1.1378	0.05257	0.051701	0.999995	33	0	1.1378
Cd27	6	0.94769	0.96422	0.999995	684	1	0.16535	0.45016	0.44869	0.999995	287	0	0.16535
Mbd2	11	0.95466	0.98952	0.999995	685	2	0.30042	0.44199	0.44286	0.999995	277	0	0.30042
Map3k12	11	0.96085	0.99109	0.999995	686	2	0.35263	0.55425	0.55477	0.999995	359	0	0.35263
H2-Q1	9	0.96146	0.98615	0.999995	687	2	0.090216	0.39008	0.39076	0.999995	239	0	0.090216
Baz2a	9	0.96158	0.98621	0.999995	688	2	0.4098	0.17901	0.18058	0.999995	97	0	0.4098
Pgls	11	0.96351	0.99196	0.999995	689	3	0.11794	0.9348	0.9338	0.999995	629	0	0.11794
Nfe2l2	9	0.96387	0.98693	0.999995	690	2	0.48247	0.1514	0.15252	0.999995	86	0	0.48247
Men1	10	0.96559	0.99007	0.999995	691	1	0.24641	0.34189	0.34006	0.999995	202	0	0.24641
Jun	10	0.96598	0.99015	0.999995	692	2	0.2554	0.73995	0.73909	0.999995	491	0	0.2554
Zfp541	11	0.96731	0.99296	0.999995	693	2	0.23029	0.59146	0.59102	0.999995	386	0	0.23029
Smad3	11	0.96809	0.9931	0.999995	694	2	0.39097	0.63157	0.63084	0.999995	420	0	0.39097
Asf1b	10	0.9688	0.99074	0.999995	695	2	0.43715	0.29263	0.29006	0.999995	176	0	0.43715
Slc26a1	11	0.97068	0.99342	0.999995	696	2	0.10674	0.84309	0.84291	0.999995	558	0	0.10674
Relb	11	0.97158	0.99353	0.999995	697	2	0.14087	0.51911	0.51972	0.999995	335	0	0.14087
Suz12	11	0.97471	0.99403	0.999995	698	2	0.42966	0.0035322	0.0036763	0.668165	4	1	0.42966
Asf1a	8	0.97666	0.98855	0.999995	699	1	0.27227	0.53606	0.53551	0.999995	348	0	0.27227
Bahd1	11	0.97915	0.99477	0.999995	700	1	0.45835	0.24874	0.24926	0.999995	145	0	0.45835
Rcor1	9	0.97943	0.99234	0.999995	701	2	0.27914	0.34542	0.34604	0.999995	209	0	0.27914
Prr14	11	0.9822	0.99531	0.999995	702	2	0.37832	0.20508	0.20501	0.999995	116	0	0.37832
Eed	10	0.98566	0.9952	0.999995	703	2	0.35022	0.52227	0.52061	0.999995	338	0	0.35022
Jarid2	11	0.98627	0.99622	0.999995	704	1	0.28195	0.24107	0.24167	0.999995	138	0	0.28195
Arid2	10	0.98714	0.99556	0.999995	705	1	0.24686	0.74937	0.74822	0.999995	499	0	0.24686
Nf1	10	0.98757	0.99567	0.999995	706	2	0.10497	0.90987	0.90904	0.999995	606	0	0.10497
Mbtd1	10	0.98856	0.99612	0.999995	707	2	0.17929	0.28411	0.2816	0.999995	168	0	0.17929
Baz1a	11	0.98988	0.99709	0.999995	708	2	0.47377	0.45923	0.46004	0.999995	296	0	0.47377
Rb1	11	0.99264	0.99778	0.999995	709	1	0.58514	0.32763	0.3282	0.999995	194	0	0.58514
Taf5l	11	0.99324	0.99794	0.999995	710	1	1.205	0.051807	0.053046	0.999995	31	0	1.205
Naa60	6	0.99326	0.99311	0.999995	711	0	0.4618	0.18951	0.1897	0.999995	107	0	0.4618
Deaf1	9	0.99361	0.99561	0.999995	712	1	0.12846	0.90205	0.9025	0.999995	603	0	0.12846
Kdm2b	11	0.99368	0.99808	0.999995	713	1	0.88849	0.08628	0.086217	0.999995	48	0	0.88849
Trim28	9	0.99646	0.99698	0.999995	714	1	0.28666	0.32854	0.32959	0.999995	196	0	0.28666
Rai1	10	0.99757	0.99801	0.999995	715	1	0.26465	0.27933	0.27701	0.999995	163	0	0.26465
Dmtf1	10	0.99818	0.99825	0.999995	716	1	0.51854	0.024806	0.024903	0.999995	16	0	0.51854
Hdac11	10	0.99839	0.99834	0.999995	717	1	0.34395	0.25601	0.25407	0.999995	149	0	0.34395
Csf3	9	0.99863	0.99847	0.999995	718	0	0.35393	0.36578	0.3661	0.999995	228	0	0.35393
Socs6	10	0.99918	0.99909	0.999995	719	0	0.35614	0.63306	0.63119	0.999995	422	0	0.35614
Rnf17	11	0.99933	0.99944	0.999995	720	1	0.32858	0.23221	0.23264	0.999995	134	0	0.32858
Apc	8	0.9994	0.99929	0.999995	721	0	0.34052	0.3422	0.34224	0.999995	203	0	0.34052
Tsc1	10	0.9998	0.99973	0.999995	722	0	0.52137	0.50683	0.50519	0.999995	330	0	0.52137
Trp53	10	0.99996	0.99997	0.999995	723	0	0.41828	0.075163	0.075104	0.999995	42	0	0.41828
Control	712	0.99998	1	0.999995	724	268	0.11775	0.35063	0.35125	0.999995	214	2	0.11775
Tada1	10	0.99999	1	0.999995	725	0	1.4826	0.061888	0.062467	0.999995	35	0	1.4826
Tada2b	10	1	1	0.999995	726	0	1.8416	0.028572	0.028653	0.999995	18	0	1.8416
Dot1l	11	1	1	0.999995	727	0	0.70443	0.14695	0.14775	0.999995	84	0	0.70443

## Sheet: In vivo B6 Rag1 mice
id	num	neg|score	neg|p-value	neg|fdr	neg|rank	neg|goodsgrna	neg|lfc	pos|score	pos|p-value	pos|fdr	pos|rank	pos|goodsgrna	pos|lfc
Npm1	10	1.9154e-06	4.9479e-06	0.003597	1	9	-2.541	0.99847	0.99829	0.999955	712	0	-2.541
Elp3	11	8.1031e-06	6.4323e-05	0.017986	2	11	-1.6992	0.99952	0.99957	0.999955	721	0	-1.6992
Eif6	11	1.0965e-05	8.4114e-05	0.017986	3	10	-1.507	0.97856	0.97882	0.999955	681	0	-1.507
Brd4	10	1.5361e-05	0.00010391	0.017986	4	8	-1.8822	0.0096033	0.018292	0.808353	14	1	-1.8822
Carm1	10	1.7318e-05	0.0001237	0.017986	5	9	-2.7487	0.65326	0.65097	0.999955	431	0	-2.7487
Hdac3	10	2.228e-05	0.00020286	0.024152	6	8	-2.3643	0.64474	0.64234	0.999955	424	0	-2.3643
Smc1a	10	2.8112e-05	0.00023255	0.024152	7	10	-1.8258	0.9997	0.99965	0.999955	723	0	-1.8258
Chmp5	9	3.4717e-05	0.00031172	0.024626	8	7	-2.6614	0.84157	0.84172	0.999955	566	0	-2.6614
Cdc5l	11	4.3115e-05	0.0003513	0.024626	9	9	-1.6081	0.81057	0.81079	0.999955	542	0	-1.6081
Bptf	10	4.5063e-05	0.00042057	0.024626	10	10	-1.8918	0.99995	0.99996	0.999955	727	0	-1.8918
Uhrf1	11	4.834e-05	0.00038099	0.024626	11	10	-2.1142	0.19228	0.19261	0.999955	119	0	-2.1142
Rpl7a	8	5.1911e-05	0.00031172	0.024626	12	8	-1.6999	0.99995	0.99991	0.999955	726	0	-1.6999
Ube2n	9	8.8321e-05	0.00073724	0.038284	13	6	-2.8371	0.54445	0.54541	0.999955	358	0	-2.8371
Atp6v0c	6	9.7068e-05	0.00044036	0.024626	14	6	-1.6731	0.9999	0.99986	0.999955	725	0	-1.6731
Smc4	11	0.00010468	0.00088567	0.042926	15	10	-1.6625	0.99933	0.99942	0.999955	717	0	-1.6625
Kat8	10	0.00011036	0.0010341	0.046987	16	9	-1.1373	0.99702	0.99684	0.999955	707	0	-1.1373
Eif3a	10	0.00014319	0.0012914	0.052158	17	9	-1.8597	0.41307	0.41068	0.999955	274	0	-1.8597
Prmt1	10	0.00015698	0.0014102	0.053957	18	8	-1.448	0.7716	0.77038	0.999955	511	0	-1.448
Smndc1	8	0.0001935	0.0011529	0.049302	19	8	-2.1127	0.99981	0.99973	0.999955	724	0	-2.1127
Rpl32	9	0.00026588	0.0019544	0.071043	20	7	-1.8615	0.92046	0.92066	0.999955	622	0	-1.8615
Myc	10	0.0002833	0.0023503	0.077665	21	8	-1.5464	0.3575	0.35594	0.999955	234	0	-1.5464
Gmeb2	11	0.00030186	0.0027065	0.085549	22	7	-2.2929	0.3295	0.3301	0.999955	210	0	-2.2929
Rbx1	8	0.00034464	0.0022315	0.077252	23	6	-2.5053	0.52422	0.52398	0.999955	345	0	-2.5053
Plk1	10	0.00044547	0.0036565	0.098455	24	10	-1.3631	0.99955	0.99951	0.999955	722	0	-1.3631
Chmp2a	9	0.00045731	0.0033497	0.0956	25	8	-2.1714	0.99596	0.99611	0.999955	704	0	-2.1714
Sin3a	11	0.00046006	0.0040424	0.10012	26	9	-1.8874	0.9902	0.99056	0.999955	694	0	-1.8874
Brca2	11	0.00046024	0.0040424	0.10012	27	10	-1.2093	0.9995	0.99955	0.999955	719	0	-1.2093
Rpl7	8	0.00050339	0.0032211	0.0956	28	8	-1.5637	0.9995	0.9994	0.999955	720	0	-1.5637
Rpl23a	7	0.00051648	0.003419	0.0956	29	7	-1.382	0.99948	0.99953	0.999955	718	0	-1.382
Noc4l	7	0.0006518	0.0041315	0.10012	30	5	-2.5213	0.7378	0.73867	0.999955	491	0	-2.5213
Nfs1	10	0.00065898	0.0049627	0.115385	31	8	-1.0172	0.37709	0.37537	0.999955	248	0	-1.0172
Prpf19	11	0.00066222	0.0055763	0.115385	32	9	-1.7654	0.30653	0.30748	0.999955	198	0	-1.7654
Cbx1	10	0.00067062	0.0051013	0.115385	33	8	-1.4486	0.69494	0.69381	0.999955	450	0	-1.4486
Brdt	11	0.00070708	0.0059127	0.115385	34	9	-0.89531	0.73252	0.7325	0.999955	488	0	-0.89531
Smc3	11	0.00073565	0.0060513	0.115385	35	8	-1.9218	0.96893	0.96866	0.999955	671	0	-1.9218
Dpf2	11	0.00074443	0.0060909	0.115385	36	9	-1.8242	0.99898	0.99906	0.999955	715	0	-1.8242
G2e3	11	0.0007628	0.0061898	0.115385	37	7	-1.4265	0.00014076	0.00046015	0.083633	4	2	-1.4265
Morf4l1	9	0.00092784	0.0061799	0.115385	38	8	-1.235	0.97572	0.97594	0.999955	679	0	-1.235
Terf2	11	0.00093764	0.0072388	0.128356	39	9	-1.4487	0.85489	0.85503	0.999955	578	0	-1.4487
Terf1	11	0.00098233	0.0075554	0.130781	40	9	-1.4929	0.96375	0.96341	0.999955	666	0	-1.4929
Huwe1	11	0.0010529	0.0078919	0.132521	41	8	-1.3676	0.32456	0.32549	0.999955	208	0	-1.3676
Phf20	9	0.0010615	0.0068627	0.12473	42	7	-1.4422	0.92555	0.92568	0.999955	630	0	-1.4422
Taf1	11	0.001067	0.0080205	0.132521	43	8	-2.1549	0.60185	0.60127	0.999955	394	0	-2.1549
Mis18bp1	10	0.0012041	0.0088419	0.142846	44	8	-1.7466	0.95316	0.95214	0.999955	658	0	-1.7466
Rpl9	5	0.0012875	0.0053289	0.115385	45	5	-1.9213	0.99871	0.99848	0.999955	713	0	-1.9213
Brwd1	9	0.0015161	0.0094356	0.149124	46	8	-1.548	0.70467	0.70676	0.999955	460	0	-1.548
Brd8	11	0.0015276	0.011276	0.150752	47	10	-1.2303	0.22991	0.23011	0.999955	143	0	-1.2303
Phf6	9	0.0016497	0.010287	0.149568	48	8	-0.61025	0.45861	0.45888	0.999955	300	0	-0.61025
Yeats4	10	0.0016545	0.011405	0.150752	49	8	-1.3559	0.43422	0.43142	0.999955	285	0	-1.3559
Rps19	8	0.0016986	0.010079	0.149538	50	7	-1.5627	0.99128	0.99141	0.999955	698	0	-1.5627
Rcc1	8	0.0016986	0.010079	0.149538	51	7	-0.81259	0.94571	0.94532	0.999955	650	0	-0.81259
Prmt5	9	0.001765	0.011009	0.150752	52	9	-0.54821	0.99823	0.99813	0.999955	710	0	-0.54821
Rps7	8	0.0018274	0.010861	0.150752	53	7	-1.8332	0.76498	0.76514	0.999955	506	0	-1.8332
Phf11d	6	0.0020343	0.010544	0.150303	54	3	0.43807	0.015714	0.019767	0.808353	19	1	0.43807
Arnt	11	0.0021199	0.015304	0.185432	55	4	0.67771	0.41115	0.41184	0.999955	271	0	0.67771
Mphosph8	9	0.00219	0.013562	0.172977	56	8	-1.6143	0.99177	0.992	0.999955	699	0	-1.6143
Setmar	11	0.0022311	0.016066	0.190589	57	6	-0.46264	0.70251	0.70217	0.999955	457	0	-0.46264
Cdk9	10	0.0022488	0.014671	0.180771	58	9	-1.1403	0.96634	0.9654	0.999955	670	0	-1.1403
Dmap1	11	0.0022619	0.016254	0.190589	59	8	-1.0381	0.9881	0.9885	0.999955	691	0	-1.0381
Ash2l	9	0.0022738	0.014057	0.176197	60	6	-1.6506	0.85436	0.85403	0.999955	577	0	-1.6506
Rps17	6	0.0022773	0.011761	0.152685	61	6	-1.3213	0.99772	0.99771	0.999955	709	0	-1.3213
Taf9	5	0.0024336	0.010059	0.149538	62	5	-1.1532	0.99757	0.99733	0.999955	708	0	-1.1532
Cramp1l	11	0.0025085	0.017817	0.201273	63	9	-1.176	0.16748	0.1682	0.999955	104	1	-1.176
Map3k7	11	0.002537	0.017996	0.201273	64	8	-1.6081	0.49518	0.49504	0.999955	329	0	-1.6081
Phf20l1	10	0.0027851	0.017936	0.201273	65	7	-0.50361	0.96402	0.96282	0.999955	668	0	-0.50361
Smc2	11	0.0030071	0.021053	0.224512	66	10	-0.99641	0.99914	0.99922	0.999955	716	0	-0.99641
Chaf1b	11	0.0030569	0.021301	0.224512	67	9	-1.2659	0.39343	0.39352	0.999955	264	0	-1.2659
Cxxc1	10	0.0030901	0.0195	0.214792	68	7	-1.659	0.97656	0.97606	0.999955	680	0	-1.659
Taf5	11	0.003096	0.021489	0.224512	69	8	-2.0364	0.9794	0.97953	0.999955	683	0	-2.0364
Ruvbl2	11	0.003121	0.021617	0.224512	70	9	-1.3991	0.10689	0.1104	0.999955	73	1	-1.3991
Kdm5b	11	0.0035308	0.02419	0.23775	71	6	-0.57912	0.35937	0.35998	0.999955	236	0	-0.57912
Dnajc2	11	0.0035335	0.0242	0.23775	72	6	-1.7448	0.14934	0.15091	0.999955	94	1	-1.7448
Dnmt1	11	0.0039733	0.026773	0.256106	73	6	-1.9299	0.85994	0.85974	0.999955	580	0	-1.9299
Phb	8	0.0040605	0.023042	0.235941	74	7	-1.8751	0.72289	0.72335	0.999955	479	0	-1.8751
Mysm1	11	0.0042576	0.028465	0.261106	75	8	-1.5802	0.84635	0.84631	0.999955	572	0	-1.5802
Cecr2	11	0.00431	0.028732	0.261106	76	5	0.080961	0.44684	0.44776	0.999955	294	0	0.080961
Taf8	9	0.0044689	0.025249	0.244748	77	7	-1.6081	0.036993	0.042587	0.999955	30	1	-1.6081
Ruvbl1	11	0.0044902	0.02992	0.262975	78	8	-1.3155	0.86484	0.86472	0.999955	584	0	-1.3155
Snapc4	11	0.0045818	0.030385	0.262975	79	6	-0.20635	0.73167	0.73137	0.999955	485	0	-0.20635
Eed	10	0.004713	0.028475	0.261106	80	9	-0.96923	0.89405	0.89383	0.999955	603	0	-0.96923
Phf23	10	0.0047232	0.028495	0.261106	81	8	-1.2211	0.39122	0.38955	0.999955	262	0	-1.2211
Set	6	0.0049151	0.023626	0.23775	82	5	-1.9245	0.93462	0.93529	0.999955	638	0	-1.9245
Ing4	9	0.0053765	0.029979	0.262975	83	7	-1.1103	0.98051	0.98051	0.999955	684	0	-1.1103
Gtf3c4	11	0.0055556	0.035838	0.301148	84	10	-1.3516	0.56152	0.56172	0.999955	369	0	-1.3516
Hltf	11	0.0056143	0.036115	0.301148	85	7	-1.2219	0.922	0.92123	0.999955	627	0	-1.2219
Jmjd6	11	0.0056573	0.036342	0.301148	86	7	-2.2475	0.7104	0.71021	0.999955	465	0	-2.2475
Prr14	11	0.0057627	0.036867	0.301148	87	9	-1.128	0.88784	0.88799	0.999955	597	0	-1.128
Phf8	10	0.0061959	0.036619	0.301148	88	9	-1.9082	0.83047	0.82996	0.999955	558	0	-1.9082
Hif1an	11	0.0062959	0.039628	0.313145	89	9	-1.3595	0.28075	0.28148	0.999955	181	0	-1.3595
Nelfa	6	0.0064566	0.030049	0.262975	90	6	-1.8142	0.99354	0.99338	0.999955	702	0	-1.8142
Setdb1	11	0.006829	0.04223	0.326611	91	6	-1.1349	0.85193	0.85199	0.999955	575	0	-1.1349
Aurka	10	0.0069245	0.040073	0.313259	92	7	-1.1503	0.94554	0.94486	0.999955	648	0	-1.1503
Sf3b3	10	0.0074128	0.042804	0.327565	93	8	-1.3759	0.95981	0.95855	0.999955	663	0	-1.3759
Sp140	8	0.0076986	0.039281	0.313145	94	5	-1.4858	0.59255	0.59243	0.999955	389	0	-1.4858
Kras	8	0.0077223	0.039351	0.313145	95	7	-1.3939	0.9911	0.99127	0.999955	696	0	-1.3939
Vhl	11	0.0077529	0.047069	0.349178	96	9	-0.7026	0.37707	0.37765	0.999955	247	0	-0.7026
Sap130	11	0.0079857	0.048069	0.34946	97	7	-1.4996	0.91292	0.91252	0.999955	614	0	-1.4996
Smarca5	9	0.0082099	0.043883	0.332322	98	8	-0.81161	0.99112	0.99131	0.999955	697	0	-0.81161
Polr2d	9	0.0088299	0.046683	0.349178	99	6	-0.26798	0.96395	0.964	0.999955	667	0	-0.26798
Gsg2	9	0.0090311	0.047554	0.349212	100	6	-1.2188	0.71279	0.71447	0.999955	467	0	-1.2188
Zzz3	11	0.010425	0.059221	0.413636	101	9	-1.085	0.60672	0.60639	0.999955	396	0	-1.085
Alkbh1	11	0.010555	0.059756	0.413636	102	8	-0.15466	0.64045	0.63943	0.999955	422	0	-0.15466
Sap18	8	0.010558	0.051631	0.371643	103	6	-1.7277	0.56503	0.5654	0.999955	374	0	-1.7277
Zmynd8	11	0.010559	0.059776	0.413636	104	6	-0.010749	0.27337	0.27412	0.999955	178	0	-0.010749
Mier3	9	0.010875	0.055837	0.397976	105	6	-0.29289	0.84491	0.84485	0.999955	571	0	-0.29289
Rbbp7	11	0.010906	0.061438	0.413636	106	8	-1.3489	0.98681	0.98717	0.999955	688	0	-1.3489
Mllt10	10	0.011526	0.061794	0.413636	107	8	-0.84614	0.61966	0.61834	0.999955	405	0	-0.84614
Ptger3	10	0.011641	0.062269	0.413636	108	7	-0.85149	0.60764	0.60589	0.999955	397	0	-0.85149
Rel	9	0.012062	0.060765	0.413636	109	7	-1.1416	0.7306	0.73157	0.999955	484	0	-1.1416
Hdac2	9	0.013262	0.06603	0.428604	110	8	-0.46595	0.69635	0.6981	0.999955	453	0	-0.46595
Ash1l	11	0.013357	0.072205	0.460463	111	5	0.82271	0.59877	0.59829	0.999955	393	0	0.82271
Gars	10	0.013421	0.069582	0.447667	112	7	-0.96075	0.90132	0.90079	0.999955	610	0	-0.96075
Rcor2	11	0.013602	0.073273	0.463216	113	5	0.9261	0.24209	0.2426	0.999955	156	0	0.9261
Kdm8	6	0.014742	0.062586	0.413636	114	6	-0.73756	0.98526	0.98517	0.999955	687	0	-0.73756
Pcgf6	11	0.014889	0.079062	0.485255	115	6	-0.65956	0.28388	0.28447	0.999955	183	0	-0.65956
Mrgbp	6	0.015014	0.063585	0.416456	116	5	-2.4131	0.46072	0.45887	0.999955	305	0	-2.4131
Taf12	10	0.015225	0.076648	0.480371	117	5	-0.19741	0.57844	0.5775	0.999955	380	0	-0.19741
Ino80	11	0.01568	0.082358	0.490771	118	8	-0.81632	0.97885	0.9792	0.999955	682	0	-0.81632
Phip	11	0.01622	0.084871	0.500921	119	6	-1.0802	0.3146	0.31537	0.999955	202	0	-1.0802
Caprin2	10	0.016341	0.080765	0.485255	120	6	-0.31853	0.92349	0.92275	0.999955	629	0	-0.31853
Tgfb2	9	0.016636	0.08028	0.485255	121	8	-1.1546	0.82288	0.82297	0.999955	552	0	-1.1546
Asxl1	11	0.017541	0.090532	0.515428	122	8	-1.5571	0.19577	0.19597	0.999955	122	0	-1.5571
Hdac1	8	0.017672	0.079587	0.485255	123	6	-0.52835	0.94938	0.94904	0.999955	655	0	-0.52835
Mbtd1	10	0.017704	0.085881	0.500921	124	7	-1.1688	0.99372	0.99335	0.999955	703	0	-1.1688
Pwwp2a	10	0.017783	0.086128	0.500921	125	4	1.1022	0.53001	0.52831	0.999955	350	0	1.1022
Chaf1a	8	0.017863	0.080438	0.485255	126	6	-1.2778	0.52637	0.52588	0.999955	348	0	-1.2778
Aurkb	9	0.018606	0.088523	0.510763	127	7	-0.40923	0.4566	0.45687	0.999955	296	0	-0.40923
Myb	10	0.019005	0.090749	0.515428	128	8	-0.94862	0.89006	0.8899	0.999955	598	0	-0.94862
Brca1	11	0.019028	0.097132	0.539047	129	7	-1.0375	0.88431	0.88449	0.999955	594	0	-1.0375
Atf7ip	10	0.019508	0.092758	0.522754	130	7	-1.364	0.13448	0.13392	0.999955	84	1	-1.364
Psmd1	10	0.019716	0.09355	0.52316	131	7	-0.50029	0.71549	0.71439	0.999955	470	0	-0.50029
Ezh2	11	0.020048	0.10116	0.543994	132	9	-1.5724	0.94789	0.94731	0.999955	653	0	-1.5724
Suz12	11	0.020138	0.10146	0.543994	133	7	-0.33701	0.53119	0.53175	0.999955	352	0	-0.33701
Orc1	11	0.020945	0.10483	0.544373	134	6	-1.2828	0.54659	0.54732	0.999955	360	0	-1.2828
Wrb	10	0.021505	0.10028	0.543994	135	8	-0.85458	0.99647	0.99622	0.999955	705	0	-0.85458
Mina	11	0.021637	0.10803	0.549203	136	9	-0.80138	0.99314	0.99333	0.999955	700	0	-0.80138
Chrac1	9	0.022079	0.10118	0.543994	137	7	-0.68609	0.25436	0.25499	0.999955	163	0	-0.68609
Nap1l2	10	0.022094	0.10268	0.543994	138	4	0.57153	0.47805	0.47578	0.999955	317	0	0.57153
Kdm6b	11	0.022313	0.11065	0.554721	139	7	-0.24145	0.91946	0.919	0.999955	620	0	-0.24145
H2-DMb1	9	0.022344	0.10201	0.543994	140	3	0.59461	0.26146	0.26243	0.999955	166	0	0.59461
Tcf7l1	10	0.022443	0.10401	0.543994	141	6	-0.36097	0.60929	0.60766	0.999955	399	0	-0.36097
Hdac9	11	0.022539	0.1114	0.554721	142	9	-0.34401	0.92074	0.92013	0.999955	623	0	-0.34401
Rela	11	0.022908	0.11298	0.555926	143	9	-1.1169	0.69635	0.69619	0.999955	452	0	-1.1169
Mybl2	9	0.022923	0.10401	0.543994	144	7	-1.5517	0.15334	0.15429	0.999955	97	1	-1.5517
Pbrm1	9	0.023478	0.1058	0.545513	145	7	-1.2664	0.96152	0.96128	0.999955	664	0	-1.2664
Fxyd1	10	0.023538	0.10751	0.549203	146	3	1.3841	0.2207	0.21908	0.999955	137	0	1.3841
Setd2	11	0.023632	0.11598	0.559126	147	7	-1.4887	0.88005	0.88054	0.999955	590	0	-1.4887
Uhrf2	11	0.023661	0.11613	0.559126	148	9	-0.92158	0.54933	0.54999	0.999955	362	0	-0.92158
Cdc73	9	0.024944	0.11071	0.554721	149	7	-1.0397	0.91898	0.91912	0.999955	619	0	-1.0397
Csf3	9	0.025742	0.11317	0.555926	150	5	-0.1307	0.38547	0.38619	0.999955	253	0	-0.1307
Eif3b	11	0.025798	0.12441	0.579759	151	8	-0.80396	0.0063474	0.012771	0.808353	10	1	-0.80396
Phf13	11	0.026183	0.12584	0.582711	152	7	-0.54285	0.7954	0.79518	0.999955	528	0	-0.54285
Baz1b	10	0.026238	0.11755	0.560334	153	7	-0.93411	0.95325	0.95224	0.999955	659	0	-0.93411
Polr2b	10	0.02649	0.11861	0.560334	154	8	-0.69832	0.39858	0.39647	0.999955	266	0	-0.69832
Rnf17	11	0.027307	0.12997	0.594249	155	9	-1.109	0.99896	0.99905	0.999955	714	0	-1.109
H2-D1	9	0.027315	0.1187	0.560334	156	7	-0.48071	0.90062	0.90104	0.999955	609	0	-0.48071
Smarcc1	11	0.028498	0.13492	0.600785	157	6	-0.6537	0.17582	0.1763	0.999955	109	1	-0.6537
Atrx	11	0.029771	0.13978	0.608517	158	9	-1.0901	0.55614	0.55645	0.999955	365	0	-1.0901
Brd9	11	0.031581	0.1465	0.610997	159	9	-0.35222	0.99331	0.99343	0.999955	701	0	-0.35222
Yeats2	11	0.031631	0.14672	0.610997	160	8	-1.2088	0.74258	0.74217	0.999955	495	0	-1.2088
2610002M06Rik	8	0.031952	0.13233	0.596523	161	3	0.54518	0.26572	0.26442	0.999955	171	0	0.54518
Jmjd4	9	0.032526	0.13553	0.600785	162	7	-1.08	0.98715	0.98732	0.999955	689	0	-1.08
Kat6b	6	0.032583	0.11547	0.559126	163	5	-0.9771	0.0026976	0.0055169	0.473621	8	1	-0.9771
Nat10	11	0.032622	0.1503	0.617343	164	9	-0.75417	0.94327	0.94283	0.999955	644	0	-0.75417
Brd1	10	0.032959	0.14101	0.609446	165	8	-0.25167	0.83986	0.839	0.999955	564	0	-0.25167
Arid4b	10	0.03316	0.14167	0.609446	166	6	-1.3432	0.84329	0.84235	0.999955	569	0	-1.3432
Tdrkh	10	0.033763	0.14378	0.610997	167	7	-0.51676	0.71215	0.71081	0.999955	466	0	-0.51676
Alg10b	9	0.033811	0.1397	0.608517	168	4	0.80739	0.272	0.27255	0.999955	176	0	0.80739
Bmi1	9	0.033811	0.1397	0.608517	169	4	0.272	0.80116	0.8016	0.999955	532	0	0.272
Stk31	10	0.034356	0.14575	0.610997	170	8	-1.0358	0.10467	0.10657	0.999955	72	1	-1.0358
Ccnt1	11	0.035457	0.15899	0.631619	171	6	-0.7739	0.47742	0.47775	0.999955	316	0	-0.7739
Phc2	6	0.035604	0.12357	0.579601	172	4	-1.3626	0.97483	0.97486	0.999955	678	0	-1.3626
Mecom	9	0.036132	0.14693	0.610997	173	7	-1.0832	0.97374	0.97369	0.999955	676	0	-1.0832
Pygo2	10	0.03628	0.15191	0.620423	174	8	-0.85646	0.99831	0.99814	0.999955	711	0	-0.85646
Baz2b	10	0.036673	0.15345	0.623161	175	8	-1.0566	0.99694	0.99678	0.999955	706	0	-1.0566
Tada2a	9	0.036708	0.14862	0.613902	176	7	-1.1284	0.85226	0.85194	0.999955	576	0	-1.1284
Setd1a	10	0.036916	0.15429	0.623161	177	7	-0.88237	0.89608	0.89569	0.999955	606	0	-0.88237
C920025E04Rik	6	0.037413	0.12874	0.592364	178	4	-1.462	0.16053	0.16047	0.999955	102	0	-1.462
Smarca4	10	0.038288	0.15893	0.631619	179	7	-0.90931	0.10234	0.10419	0.999955	70	1	-0.90931
Kmt2d	6	0.038419	0.13155	0.596523	180	5	-0.75687	0.38413	0.38166	0.999955	251	0	-0.75687
Supt3	6	0.03892	0.13293	0.596523	181	3	0.55548	0.19397	0.19449	0.999955	120	0	0.55548
Trim24	11	0.039445	0.17098	0.66666	182	8	-1.3791	0.81822	0.81823	0.999955	546	0	-1.3791
H2-K1	11	0.039586	0.17148	0.66666	183	5	0.061925	0.35842	0.35895	0.999955	235	0	0.061925
Ing3	8	0.04219	0.16137	0.63757	184	5	-0.75258	0.98819	0.98863	0.999955	692	0	-0.75258
Ep400	11	0.042309	0.17953	0.686956	185	6	-0.2877	0.25193	0.25238	0.999955	162	0	-0.2877
Smn1	10	0.043352	0.17586	0.680067	186	7	-0.53072	0.48233	0.48001	0.999955	320	0	-0.53072
Hmgn3	8	0.043576	0.16516	0.649018	187	5	-1.1912	0.73245	0.73282	0.999955	487	0	-1.1912
Nap1l1	7	0.043703	0.15768	0.631619	188	6	-1.1536	0.93902	0.93947	0.999955	640	0	-1.1536
Rnf20	11	0.04383	0.18413	0.694577	189	5	0.16644	0.35748	0.35799	0.999955	233	0	0.16644
Asxl2	6	0.044006	0.14708	0.610997	190	4	-1.2596	0.91566	0.91631	0.999955	615	0	-1.2596
Crebbp	11	0.044447	0.18593	0.694577	191	6	-0.63655	0.3344	0.33531	0.999955	214	0	-0.63655
Ncoa3	10	0.045708	0.18333	0.694577	192	5	0.07915	0.30376	0.30185	0.999955	195	0	0.07915
Smad1	11	0.046382	0.1915	0.700317	193	3	1.3355	0.2004	0.2004	0.999955	127	0	1.3355
H2-Aa	10	0.048679	0.1928	0.700317	194	8	-0.54093	0.9515	0.95057	0.999955	657	0	-0.54093
Dmtf1	10	0.049037	0.19387	0.700317	195	4	0.55189	0.55729	0.55583	0.999955	366	0	0.55189
Rbbp4	10	0.049254	0.19459	0.700317	196	7	-0.68006	0.07753	0.081477	0.999955	54	1	-0.68006
Alkbh2	9	0.049401	0.1863	0.694577	197	6	-1.2257	0.33087	0.33174	0.999955	211	0	-1.2257
Phf2	11	0.050142	0.20248	0.71402	198	6	-0.052781	0.63933	0.63823	0.999955	421	0	-0.052781
Wnk1	9	0.050394	0.18917	0.700317	199	5	-0.85802	0.64834	0.64939	0.999955	426	0	-0.85802
Chd5	11	0.050438	0.20322	0.71402	200	3	0.91043	0.82646	0.82658	0.999955	554	0	0.91043
Alg13	11	0.05046	0.2033	0.71402	201	7	-1.0778	0.48289	0.48298	0.999955	321	0	-1.0778
Men1	10	0.051609	0.20228	0.71402	202	6	-0.99752	0.33913	0.33737	0.999955	218	0	-0.99752
Setd8	9	0.051641	0.19258	0.700317	203	6	-1.028	0.89669	0.89711	0.999955	607	0	-1.028
Mbd2	11	0.051704	0.20683	0.721576	204	6	0.014809	0.49745	0.49758	0.999955	330	0	0.014809
Zfp541	11	0.053109	0.21066	0.722394	205	6	-0.74765	0.55951	0.55968	0.999955	367	0	-0.74765
Whsc1l1	9	0.054692	0.2006	0.71402	206	7	-0.58273	0.5069	0.50847	0.999955	334	0	-0.58273
Kmt2b	6	0.056573	0.17851	0.686632	207	5	-1.043	0.88766	0.8875	0.999955	596	0	-1.043
Rnase12	9	0.057439	0.20862	0.722217	208	5	-1.4478	0.46727	0.46768	0.999955	309	0	-1.4478
Stat1	11	0.05783	0.22391	0.760657	209	4	0.73281	0.88149	0.88182	0.999955	592	0	0.73281
Ereg	9	0.058052	0.2105	0.722394	210	3	0.54778	0.75615	0.75665	0.999955	499	0	0.54778
Dimt1	10	0.059104	0.22345	0.760657	211	6	-0.39921	0.75725	0.75585	0.999955	501	0	-0.39921
H2-Bl	6	0.05965	0.18606	0.694577	212	5	-1.0289	0.96625	0.96645	0.999955	669	0	-1.0289
Prdm10	11	0.060889	0.23258	0.779183	213	8	-0.42503	0.46873	0.46941	0.999955	310	0	-0.42503
Taf3	11	0.061524	0.23421	0.779697	214	8	-0.55736	0.81912	0.81918	0.999955	548	0	-0.55736
Supt5	6	0.062482	0.1936	0.700317	215	3	0.50446	0.0073079	0.01189	0.808353	11	1	0.50446
Chmp4b	11	0.063052	0.23831	0.780397	216	5	0.66447	0.719	0.71868	0.999955	474	0	0.66447
Ncor2	10	0.064319	0.23531	0.779697	217	7	-0.64229	0.97365	0.97284	0.999955	675	0	-0.64229
Setd4	11	0.065179	0.24415	0.783072	218	4	1.021	0.4402	0.44097	0.999955	290	0	1.021
Prdm8	11	0.067099	0.24921	0.783072	219	6	-0.20026	0.79839	0.79841	0.999955	531	0	-0.20026
Sirt3	11	0.067173	0.24932	0.783072	220	6	0.013104	0.45991	0.46072	0.999955	302	0	0.013104
Supt4a	6	0.06798	0.20744	0.721576	221	3	-0.74847	0.30498	0.30389	0.999955	197	0	-0.74847
Smchd1	9	0.068845	0.24034	0.780881	222	5	-0.042104	0.63201	0.63326	0.999955	417	0	-0.042104
Ido2	9	0.06897	0.2406	0.780881	223	6	-0.75249	0.97234	0.97221	0.999955	674	0	-0.75249
Pax5	10	0.069124	0.24654	0.783072	224	4	0.72809	0.44491	0.4424	0.999955	293	0	0.72809
Ctnnb1	8	0.069313	0.23064	0.776262	225	6	-0.46055	0.98838	0.98879	0.999955	693	0	-0.46055
Klrk1	9	0.071114	0.24705	0.783072	226	5	-1.3301	0.38921	0.38993	0.999955	258	0	-1.3301
Tdrd12	9	0.071433	0.24788	0.783072	227	6	-0.28417	0.93971	0.93958	0.999955	641	0	-0.28417
Rae1	10	0.071479	0.25231	0.787245	228	6	-0.44492	0.97428	0.97353	0.999955	677	0	-0.44492
Prdm12	8	0.072089	0.23702	0.779697	229	6	-0.53287	0.010752	0.019124	0.808353	17	1	-0.53287
Ccnt2	11	0.074177	0.26785	0.813864	230	5	0.29213	0.84687	0.84681	0.999955	573	0	0.29213
Prdm6	11	0.074524	0.26868	0.813864	231	4	0.56395	0.14198	0.14373	0.999955	90	1	0.56395
Supt6	6	0.075553	0.22541	0.762205	232	4	-1.1572	0.80321	0.80223	0.999955	535	0	-1.1572
Kdm4d	11	0.075875	0.27198	0.820457	233	7	-0.72096	0.77551	0.7754	0.999955	514	0	-0.72096
Mtf2	10	0.076613	0.26381	0.813864	234	7	-0.065351	0.7647	0.76304	0.999955	505	0	-0.065351
Mbd5	11	0.077164	0.2754	0.822314	235	8	-0.72708	0.93194	0.93094	0.999955	636	0	-0.72708
Arid2	10	0.077683	0.26625	0.813864	236	7	-0.73186	0.94563	0.94493	0.999955	649	0	-0.73186
Egfr	11	0.078635	0.27913	0.822314	237	7	-0.39994	0.82559	0.82562	0.999955	553	0	-0.39994
Hdgfrp3	10	0.078725	0.26841	0.813864	238	7	-0.78101	0.66594	0.66435	0.999955	437	0	-0.78101
Dpep3	9	0.078778	0.26724	0.813864	239	6	-0.65395	0.31945	0.32047	0.999955	205	0	-0.65395
Taf10	11	0.079967	0.28266	0.823554	240	8	-0.57616	0.61452	0.61404	0.999955	403	0	-0.57616
Brd2	6	0.080637	0.23699	0.779697	241	5	-0.62481	0.95058	0.95143	0.999955	656	0	-0.62481
Tet1	11	0.082844	0.29036	0.832026	242	8	-0.76633	0.89277	0.89279	0.999955	601	0	-0.76633
Cml1	9	0.082995	0.27784	0.822314	243	4	0.25114	0.87469	0.87435	0.999955	587	0	0.25114
Phf7	8	0.08318	0.26126	0.811704	244	6	-0.83363	0.99029	0.99045	0.999955	695	0	-0.83363
Lag3	10	0.083492	0.27938	0.822314	245	5	0.34213	0.31665	0.31484	0.999955	204	0	0.34213
Gm10094	6	0.083726	0.2443	0.783072	246	4	-1.1897	0.86042	0.85979	0.999955	582	0	-1.1897
Glyr1	11	0.084134	0.29334	0.836296	247	6	-0.65922	0.053134	0.06311	0.999955	40	1	-0.65922
Mier1	9	0.085085	0.28288	0.823554	248	5	-0.78571	0.53046	0.53167	0.999955	351	0	-0.78571
Ctcf	10	0.085096	0.2832	0.823554	249	6	-0.84592	0.3846	0.38299	0.999955	252	0	-0.84592
Suv420h1	6	0.086294	0.24989	0.783072	250	2	0.50472	0.35096	0.34932	0.999955	225	0	0.50472
Kdm5c	11	0.086909	0.30033	0.847574	251	5	0.53461	0.24099	0.2416	0.999955	153	0	0.53461
Smyd2	10	0.087053	0.28741	0.832026	252	6	-0.51188	0.61259	0.61067	0.999955	401	0	-0.51188
Chd6	11	0.087299	0.30139	0.847574	253	8	-0.74122	0.90755	0.90724	0.999955	612	0	-0.74122
Rere	11	0.087551	0.30196	0.847574	254	6	-0.18492	0.12959	0.13143	0.999955	81	1	-0.18492
Nap1l3	10	0.088237	0.29025	0.832026	255	3	1.324	0.50601	0.50435	0.999955	333	0	1.324
Slc25a15	11	0.092108	0.31311	0.865511	256	8	-0.32471	0.85538	0.85554	0.999955	579	0	-0.32471
Nptxr	11	0.093218	0.31574	0.869482	257	8	-0.46311	0.37153	0.3718	0.999955	242	0	-0.46311
H2-Ob	10	0.095349	0.30676	0.854475	258	6	-0.36614	0.33379	0.33176	0.999955	213	0	-0.36614
Pcgf5	8	0.095945	0.29069	0.832026	259	6	-0.90112	0.42423	0.42418	0.999955	282	0	-0.90112
Chmp1b	6	0.097723	0.27559	0.822314	260	5	-0.91651	0.80558	0.80428	0.999955	539	0	-0.91651
Meaf6	9	0.097889	0.31104	0.863076	261	5	-0.87629	0.94113	0.94096	0.999955	642	0	-0.87629
Phf11c	6	0.098334	0.27683	0.822314	262	3	-0.38172	0.60898	0.60709	0.999955	398	0	-0.38172
Chd7	11	0.098881	0.32963	0.887103	263	5	0.14513	0.92791	0.92693	0.999955	634	0	0.14513
Chd4	11	0.1005	0.33334	0.887103	264	7	-1.1174	0.73718	0.73711	0.999955	489	0	-1.1174
Cbx2	8	0.10181	0.30314	0.847634	265	4	0.2172	0.84899	0.84838	0.999955	574	0	0.2172
Tdrd3	10	0.10181	0.32125	0.881322	266	6	-0.24149	0.52674	0.52522	0.999955	349	0	-0.24149
Tdrd7	10	0.10384	0.3258	0.887103	267	7	-0.83778	0.57429	0.57326	0.999955	377	0	-0.83778
Dpep2	11	0.10388	0.34135	0.893595	268	6	-0.91117	0.35368	0.3544	0.999955	227	0	-0.91117
Chd9	11	0.10504	0.34424	0.893795	269	6	-0.54932	0.68067	0.6802	0.999955	444	0	-0.54932
Kdm5d	11	0.10561	0.34567	0.894301	270	6	-0.29426	0.79606	0.79589	0.999955	529	0	-0.29426
Hemk1	10	0.10583	0.3303	0.887103	271	6	-0.31949	0.9723	0.97146	0.999955	673	0	-0.31949
Nsd1	10	0.107	0.33277	0.887103	272	6	-0.37247	0.35403	0.35236	0.999955	228	0	-0.37247
Ube2v1	9	0.10701	0.32796	0.887103	273	6	-0.68433	0.74947	0.75025	0.999955	496	0	-0.68433
Chd3	11	0.10743	0.34999	0.897331	274	6	-0.20424	0.93818	0.93755	0.999955	639	0	-0.20424
Mybl1	11	0.10816	0.35156	0.897331	275	7	-0.090154	0.92816	0.92718	0.999955	635	0	-0.090154
Btla	10	0.10836	0.33556	0.887103	276	4	0.95796	0.13786	0.13716	0.999955	88	1	0.95796
Jmjd8	9	0.10842	0.33091	0.887103	277	5	0.24832	0.14331	0.14467	0.999955	92	1	0.24832
Ehmt2	11	0.10846	0.35233	0.897331	278	8	-0.13807	0.83435	0.8341	0.999955	561	0	-0.13807
Kdm2a	11	0.10851	0.35244	0.897331	279	6	-0.80962	0.018932	0.033512	0.999955	22	1	-0.80962
Hdac4	11	0.10879	0.35301	0.897331	280	8	-0.43405	0.82903	0.82893	0.999955	556	0	-0.43405
Ing5	11	0.10943	0.35446	0.897889	281	8	-0.54226	0.80712	0.80762	0.999955	540	0	-0.54226
Cbx3	6	0.10963	0.30113	0.847574	282	4	-0.64268	0.43581	0.43407	0.999955	286	0	-0.64268
Hells	11	0.11071	0.35732	0.89887	283	6	0.10062	0.72605	0.72576	0.999955	480	0	0.10062
Smarcb1	10	0.11085	0.34095	0.893595	284	7	-0.14318	0.1732	0.17158	0.999955	108	0	-0.14318
Mbd4	9	0.11477	0.34276	0.893595	285	6	-1.1122	0.67441	0.6755	0.999955	441	0	-1.1122
Icosl	11	0.11647	0.36955	0.924608	286	7	-0.72022	0.83073	0.83065	0.999955	559	0	-0.72022
Dscam	11	0.11743	0.37124	0.924608	287	6	-0.9007	0.89221	0.89231	0.999955	600	0	-0.9007
Prdm14	11	0.1176	0.3716	0.924608	288	7	-0.35688	0.70994	0.70963	0.999955	464	0	-0.35688
Ttf1	11	0.1182	0.37264	0.924608	289	7	-0.44037	0.94731	0.94674	0.999955	651	0	-0.44037
Phf12	10	0.11828	0.35606	0.898793	290	6	-0.41247	0.92698	0.92632	0.999955	632	0	-0.41247
Zcwpw1	11	0.11944	0.37487	0.925591	291	4	1.1454	0.30449	0.30552	0.999955	196	0	1.1454
H2-Q7	7	0.12023	0.32474	0.887103	292	2	0.82787	0.32108	0.31955	0.999955	207	0	0.82787
Kif11	8	0.12059	0.34293	0.893595	293	6	-0.25177	0.60549	0.60627	0.999955	395	0	-0.25177
Kdm3a	11	0.1206	0.37686	0.925591	294	6	-0.75462	0.86042	0.8601	0.999955	581	0	-0.75462
Uty	11	0.12271	0.38058	0.926882	295	5	0.19107	0.51165	0.51182	0.999955	339	0	0.19107
Arid1a	11	0.12424	0.38351	0.926882	296	5	0.11089	0.19693	0.197	0.999955	124	0	0.11089
Mta1	10	0.13053	0.3808	0.926882	297	7	-0.20124	0.86056	0.85945	0.999955	583	0	-0.20124
Psma3	6	0.13212	0.33515	0.887103	298	3	-0.11811	0.92608	0.92681	0.999955	631	0	-0.11811
Prdm2	10	0.13222	0.38426	0.926882	299	5	0.044396	0.64877	0.64647	0.999955	427	0	0.044396
Ing2	11	0.13248	0.3981	0.940659	300	7	-0.34172	0.76245	0.76202	0.999955	503	0	-0.34172
Gm11127	9	0.13266	0.3757	0.925591	301	3	0.45992	0.73204	0.7331	0.999955	486	0	0.45992
Chd1	10	0.13337	0.38631	0.926882	302	7	-0.20266	0.94441	0.9437	0.999955	647	0	-0.20266
Zmynd11	10	0.13469	0.38899	0.930247	303	6	-0.78859	0.51008	0.50829	0.999955	337	0	-0.78859
Senp3	11	0.13673	0.40581	0.948634	304	6	-0.49681	0.71721	0.71692	0.999955	473	0	-0.49681
Ube2i	10	0.13697	0.39348	0.937905	305	6	-0.38626	0.4569	0.45482	0.999955	297	0	-0.38626
Prmt7	9	0.1373	0.38394	0.926882	306	6	-0.8423	0.53223	0.53314	0.999955	353	0	-0.8423
Sin3b	9	0.13825	0.38557	0.926882	307	3	0.43807	0.46925	0.46959	0.999955	311	0	0.43807
H2-Ab1	10	0.13963	0.39852	0.940659	308	6	-0.066864	0.23698	0.23545	0.999955	148	0	-0.066864
Clock	9	0.14559	0.3979	0.940659	309	3	0.90812	0.19627	0.19754	0.999955	123	0	0.90812
Nf1	10	0.14627	0.41126	0.958299	310	3	0.87696	0.087053	0.090175	0.999955	61	1	0.87696
Chd2	11	0.14693	0.42359	0.975924	311	7	-0.20402	0.87395	0.87414	0.999955	586	0	-0.20402
Cxcl12	9	0.14734	0.40067	0.942667	312	3	0.37721	0.23268	0.23372	0.999955	146	0	0.37721
Dicer1	11	0.14931	0.42774	0.98097	313	7	-0.49083	0.9196	0.91908	0.999955	621	0	-0.49083
Brd7	9	0.14966	0.40509	0.948634	314	4	0.046937	0.80335	0.80384	0.999955	536	0	0.046937
Ccdc79	11	0.15057	0.42993	0.982885	315	7	-0.2082	0.43264	0.43328	0.999955	284	0	-0.2082
Satl1	11	0.15421	0.43641	0.991468	316	6	-0.22794	0.22767	0.22784	0.999955	141	0	-0.22794
Trdmt1	11	0.1551	0.43788	0.991719	317	7	-0.32687	0.46634	0.4672	0.999955	307	0	-0.32687
Brpf1	11	0.15654	0.44017	0.9938	318	5	0.15682	0.98782	0.98822	0.999955	690	0	0.15682
Vdac1	9	0.1595	0.42132	0.975473	319	4	0.078375	0.36102	0.36169	0.999955	238	0	0.078375
Msl3	8	0.16143	0.41572	0.96558	320	4	0.10942	0.057648	0.061349	0.999955	44	1	0.10942
Ints12	10	0.16514	0.44758	0.998867	321	5	-0.2011	0.91021	0.90939	0.999955	613	0	-0.2011
Nap1l4	10	0.16602	0.44919	0.998867	322	6	-0.49616	0.24999	0.24819	0.999955	161	0	-0.49616
Ncor1	9	0.16722	0.43447	0.990156	323	5	-0.12772	0.82924	0.82934	0.999955	557	0	-0.12772
Akap1	11	0.16958	0.46131	0.999995	324	5	0.17873	0.48133	0.48154	0.999955	319	0	0.17873
Kat2b	11	0.17285	0.46695	0.999995	325	2	0.36003	0.66999	0.66925	0.999955	439	0	0.36003
Phc1	9	0.17408	0.44606	0.998867	326	4	0.39274	0.69514	0.6967	0.999955	451	0	0.39274
Setd3	9	0.17478	0.44717	0.998867	327	6	-0.28261	0.49125	0.49237	0.999955	326	0	-0.28261
Pmp22	10	0.17532	0.46474	0.999995	328	5	0.040438	0.22888	0.22741	0.999955	142	0	0.040438
Kir3dl1	10	0.17537	0.46481	0.999995	329	5	0.0039709	0.096487	0.098755	0.999955	64	1	0.0039709
Rnf2	11	0.17582	0.47164	0.999995	330	5	0.10013	0.5721	0.5719	0.999955	376	0	0.10013
Mgea5	9	0.17912	0.45425	0.999995	331	6	-0.20055	0.97191	0.97185	0.999955	672	0	-0.20055
Smyd4	10	0.17917	0.4706	0.999995	332	4	1.3071	0.0096343	0.018352	0.808353	15	2	1.3071
Pcgf2	10	0.1808	0.473	0.999995	333	6	-0.75711	0.4759	0.47363	0.999955	315	0	-0.75711
Dnmt3a	11	0.18234	0.48155	0.999995	334	7	-0.44906	0.28597	0.28674	0.999955	184	0	-0.44906
Epc2	8	0.1843	0.44928	0.998867	335	4	0.035961	0.28282	0.28229	0.999955	182	0	0.035961
Thbs1	9	0.18861	0.46938	0.999995	336	5	0.11634	0.78431	0.78404	0.999955	518	0	0.11634
Baz1a	11	0.1902	0.49407	0.999995	337	7	-0.22977	0.3196	0.32049	0.999955	206	0	-0.22977
Piwil4	11	0.19228	0.49725	0.999995	338	5	0.44138	0.41551	0.41618	0.999955	277	0	0.44138
Chd8	11	0.19249	0.49758	0.999995	339	7	-0.26868	0.18761	0.18834	0.999955	115	0	-0.26868
Pygo1	11	0.19472	0.5008	0.999995	340	6	-0.1225	0.083638	0.089512	0.999955	60	1	-0.1225
Prkab2	10	0.19568	0.49392	0.999995	341	5	-0.3489	0.3409	0.3391	0.999955	220	0	-0.3489
Brd3	11	0.19743	0.5046	0.999995	342	6	-0.16378	0.24975	0.25014	0.999955	160	0	-0.16378
Jmjd1c	11	0.19751	0.50472	0.999995	343	7	-0.34325	0.77515	0.77502	0.999955	513	0	-0.34325
Nat8	10	0.1976	0.49629	0.999995	344	5	-0.29837	0.56099	0.5596	0.999955	368	0	-0.29837
Glt28d2	9	0.19912	0.48504	0.999995	345	2	1.5682	0.51729	0.51843	0.999955	341	0	1.5682
Phf11b	5	0.19942	0.4242	0.975924	346	3	-0.30719	0.16948	0.17052	0.999955	106	0	-0.30719
Smarcad1	10	0.19984	0.49942	0.999995	347	6	-0.14488	0.94383	0.94312	0.999955	646	0	-0.14488
Aire	9	0.20043	0.48721	0.999995	348	6	-0.81584	0.89166	0.89191	0.999955	599	0	-0.81584
Hmgn5	9	0.20264	0.49091	0.999995	349	5	-0.17762	0.70972	0.7115	0.999955	463	0	-0.17762
Prdm9	11	0.20271	0.51253	0.999995	350	6	-0.13783	0.92283	0.92208	0.999955	628	0	-0.13783
Mecp2	11	0.20404	0.51446	0.999995	351	5	1.2537	0.77912	0.7789	0.999955	516	0	1.2537
Nat9	9	0.20763	0.49865	0.999995	352	5	-0.37601	0.67865	0.67998	0.999955	443	0	-0.37601
Arid4a	11	0.20794	0.52016	0.999995	353	7	-0.23805	0.98249	0.9825	0.999955	685	0	-0.23805
Prmt2	10	0.2088	0.51175	0.999995	354	5	0.18937	0.26669	0.26458	0.999955	173	0	0.18937
Jun	10	0.21017	0.5135	0.999995	355	4	0.94247	0.80345	0.80239	0.999955	537	0	0.94247
Sfmbt2	9	0.21232	0.50566	0.999995	356	3	1.1187	0.23724	0.23814	0.999955	149	0	1.1187
Prdm5	9	0.21233	0.50567	0.999995	357	4	0.45772	0.78696	0.78686	0.999955	520	0	0.45772
Prkaa1	9	0.21382	0.50791	0.999995	358	5	-0.94406	0.74158	0.74255	0.999955	494	0	-0.94406
Ciita	11	0.21539	0.53092	0.999995	359	4	1.3185	0.63028	0.62973	0.999955	416	0	1.3185
Smad7	10	0.22043	0.52655	0.999995	360	6	0.13138	0.23799	0.23642	0.999955	150	0	0.13138
Grhl1	10	0.2207	0.52687	0.999995	361	5	0.027306	0.049652	0.056866	0.999955	37	1	0.027306
Aanat	8	0.221	0.49868	0.999995	362	3	0.99061	0.26021	0.25889	0.999955	165	0	0.99061
Cd8a	10	0.22275	0.52946	0.999995	363	4	0.41409	0.67633	0.67509	0.999955	442	0	0.41409
Kdm4c	11	0.22375	0.54344	0.999995	364	6	0.17088	0.8112	0.81147	0.999955	543	0	0.17088
Ube2b	9	0.22531	0.52406	0.999995	365	6	-0.17269	0.71996	0.72147	0.999955	475	0	-0.17269
Kdm5a	11	0.22563	0.54606	0.999995	366	7	-0.28059	0.9328	0.93183	0.999955	637	0	-0.28059
Entpd1	10	0.22684	0.53532	0.999995	367	3	0.55106	0.16777	0.1663	0.999955	105	1	0.55106
Stat2	11	0.22747	0.54864	0.999995	368	7	-0.30904	0.42413	0.42474	0.999955	281	0	-0.30904
Smarce1	9	0.22786	0.52775	0.999995	369	4	0.25821	0.19722	0.19842	0.999955	125	0	0.25821
Rbbp5	10	0.23006	0.53902	0.999995	370	6	-0.71413	0.25789	0.25596	0.999955	164	0	-0.71413
Rcor3	6	0.23142	0.47453	0.999995	371	4	-0.78071	0.94847	0.94933	0.999955	654	0	-0.78071
Mgmt	11	0.23197	0.55516	0.999995	372	7	-0.10514	0.066508	0.07451	0.999955	47	1	-0.10514
Cbx7	9	0.23311	0.53544	0.999995	373	3	1.6509	0.40032	0.40108	0.999955	268	0	1.6509
Smarcd2	10	0.23611	0.54693	0.999995	374	6	-0.77949	0.26279	0.2607	0.999955	167	0	-0.77949
Gatad2a	11	0.2406	0.56747	0.999995	375	6	-0.40313	0.92144	0.92072	0.999955	624	0	-0.40313
Prdm1	11	0.24098	0.56802	0.999995	376	5	0.062375	0.057165	0.066465	0.999955	43	1	0.062375
Lbr	10	0.24177	0.55441	0.999995	377	6	-0.26976	0.79496	0.79385	0.999955	527	0	-0.26976
Brwd3	10	0.24319	0.55626	0.999995	378	5	0.10712	0.4901	0.48809	0.999955	325	0	0.10712
Chmp4c	11	0.24387	0.57221	0.999995	379	6	-0.19187	0.62101	0.6206	0.999955	407	0	-0.19187
Elmsan1	6	0.24438	0.49231	0.999995	380	4	-0.33021	0.23003	0.22933	0.999955	144	0	-0.33021
H2-DMa	6	0.24609	0.49451	0.999995	381	2	1.6603	0.45841	0.45667	0.999955	299	0	1.6603
Trim66	10	0.24989	0.56464	0.999995	382	5	0.11705	0.90003	0.89953	0.999955	608	0	0.11705
Setd7	11	0.25339	0.585	0.999995	383	4	0.31477	0.082331	0.088216	0.999955	59	1	0.31477
Smarcd1	10	0.25566	0.57174	0.999995	384	6	-0.37174	0.4894	0.48739	0.999955	324	0	-0.37174
Hyal1	11	0.2577	0.59035	0.999995	385	7	-0.43142	0.26593	0.26659	0.999955	172	0	-0.43142
Hdac7	11	0.25917	0.59227	0.999995	386	6	-0.50701	0.91845	0.91814	0.999955	618	0	-0.50701
Nfkb2	11	0.25996	0.59344	0.999995	387	7	-0.058538	0.20844	0.20835	0.999955	132	0	-0.058538
Setdb2	11	0.25999	0.59348	0.999995	388	5	0.22819	0.41202	0.41263	0.999955	272	0	0.22819
Tyw5	6	0.26136	0.51376	0.999995	389	3	0.62199	0.050966	0.052987	0.999955	38	1	0.62199
Scml2	8	0.26193	0.55056	0.999995	390	5	-0.26638	0.73728	0.73776	0.999955	490	0	-0.26638
Fbxo11	10	0.26202	0.57937	0.999995	391	5	0.016109	0.37203	0.3702	0.999955	245	0	0.016109
Mbd6	11	0.26868	0.60456	0.999995	392	6	-0.076132	0.94244	0.94201	0.999955	643	0	-0.076132
Cbx4	10	0.27	0.58887	0.999995	393	5	0.061789	0.77465	0.77344	0.999955	512	0	0.061789
Prmt6	11	0.2707	0.60701	0.999995	394	6	-0.31729	0.91654	0.91631	0.999955	616	0	-0.31729
Smyd3	11	0.27282	0.60998	0.999995	395	7	-0.22497	0.66895	0.66827	0.999955	438	0	-0.22497
L3mbtl2	11	0.27302	0.61029	0.999995	396	4	0.3843	0.54451	0.54519	0.999955	359	0	0.3843
Jade3	6	0.27465	0.53112	0.999995	397	3	-0.4282	0.42129	0.41898	0.999955	280	0	-0.4282
Ccl5	9	0.27471	0.58671	0.999995	398	5	-0.0028595	0.56365	0.56447	0.999955	372	0	-0.0028595
Cd40lg	9	0.27505	0.5871	0.999995	399	4	0.36717	0.38996	0.39058	0.999955	260	0	0.36717
Prdm16	11	0.27654	0.61406	0.999995	400	6	-0.11979	0.097909	0.10183	0.999955	66	1	-0.11979
Areg	9	0.27662	0.58865	0.999995	401	5	-0.62289	0.59214	0.59253	0.999955	388	0	-0.62289
Tap2	10	0.27732	0.59769	0.999995	402	3	0.58328	0.14011	0.13951	0.999955	89	1	0.58328
Aurkc	8	0.27791	0.57058	0.999995	403	5	-0.30466	0.55195	0.55156	0.999955	363	0	-0.30466
Ppargc1a	9	0.28265	0.59493	0.999995	404	5	-0.12626	0.35634	0.35707	0.999955	231	0	-0.12626
Cd27	6	0.28277	0.54091	0.999995	405	4	-0.21104	0.62527	0.62319	0.999955	411	0	-0.21104
Rbm14	11	0.28334	0.6214	0.999995	406	4	0.79244	0.66004	0.65883	0.999955	434	0	0.79244
Phf11a	6	0.28568	0.54449	0.999995	407	3	-0.34138	0.068557	0.069939	0.999955	48	1	-0.34138
Mfge8	11	0.2874	0.62544	0.999995	408	6	-0.19923	0.76168	0.76126	0.999955	502	0	-0.19923
Sp100	9	0.28803	0.60013	0.999995	409	5	-0.4395	0.42767	0.42853	0.999955	283	0	-0.4395
Phf21b	10	0.28876	0.61123	0.999995	410	6	-0.33581	0.36352	0.36166	0.999955	239	0	-0.33581
Nhs	11	0.28971	0.62756	0.999995	411	5	0.15804	0.76359	0.7632	0.999955	504	0	0.15804
Adora3	6	0.28989	0.54973	0.999995	412	2	1.2339	0.1376	0.13715	0.999955	87	0	1.2339
Kmt2a	6	0.29114	0.55115	0.999995	413	3	0.52899	0.0029161	0.0058633	0.473621	9	2	0.52899
Nat14	11	0.29539	0.63336	0.999995	414	4	0.45046	0.055823	0.065367	0.999955	42	1	0.45046
Phf1	10	0.29702	0.62106	0.999995	415	6	0.031405	0.50737	0.5057	0.999955	335	0	0.031405
L3mbtl3	10	0.29735	0.62147	0.999995	416	4	0.35138	0.84305	0.84213	0.999955	568	0	0.35138
Alkbh3	10	0.29977	0.62431	0.999995	417	6	-0.36765	0.72125	0.72028	0.999955	476	0	-0.36765
Shprh	10	0.30065	0.62534	0.999995	418	6	-0.28455	0.45913	0.45703	0.999955	301	0	-0.28455
Braf	9	0.30078	0.61322	0.999995	419	5	-0.56584	0.77831	0.77867	0.999955	515	0	-0.56584
Hr	10	0.30415	0.62942	0.999995	420	6	-0.37675	0.41466	0.41225	0.999955	275	0	-0.37675
Chd1l	10	0.30564	0.63088	0.999995	421	5	0.22358	0.36864	0.36676	0.999955	240	0	0.22358
Dnajc1	11	0.30944	0.64698	0.999995	422	6	-0.1355	0.23214	0.23254	0.999955	145	0	-0.1355
Msh6	11	0.3119	0.64931	0.999995	423	4	0.69502	0.88067	0.88107	0.999955	591	0	0.69502
Mllt3	6	0.3119	0.57616	0.999995	424	4	-0.094776	0.89565	0.89565	0.999955	604	0	-0.094776
Arrb1	11	0.31335	0.65052	0.999995	425	6	-0.31052	0.52619	0.52685	0.999955	347	0	-0.31052
2410016O06Rik	10	0.31344	0.63917	0.999995	426	3	1.0174	0.29254	0.28999	0.999955	189	0	1.0174
Sirt4	11	0.3146	0.65181	0.999995	427	5	0.59511	0.079711	0.08597	0.999955	56	1	0.59511
Dnmt3l	9	0.31472	0.62698	0.999995	428	5	-0.54115	0.40472	0.4052	0.999955	269	0	-0.54115
Asz1	9	0.31755	0.6298	0.999995	429	4	0.32512	0.33652	0.33734	0.999955	216	0	0.32512
Smc1b	11	0.3186	0.65563	0.999995	430	6	0.035285	0.5869	0.58671	0.999955	382	0	0.035285
Atad2	10	0.31938	0.64599	0.999995	431	4	0.42254	0.90571	0.90496	0.999955	611	0	0.42254
Rps6ka5	10	0.32115	0.64794	0.999995	432	5	0.83404	0.2991	0.29706	0.999955	192	0	0.83404
Smad2	8	0.32885	0.62918	0.999995	433	5	-0.42697	0.65941	0.66068	0.999955	433	0	-0.42697
Phc3	10	0.32932	0.65746	0.999995	434	5	0.27889	0.87824	0.87793	0.999955	588	0	0.27889
H2-Q2	10	0.33003	0.65828	0.999995	435	6	-0.20935	0.79279	0.79165	0.999955	524	0	-0.20935
Mta2	10	0.33458	0.66314	0.999995	436	6	-0.14323	0.8428	0.84189	0.999955	567	0	-0.14323
Rsf1	11	0.33538	0.6709	0.999995	437	2	1.5193	0.28805	0.28901	0.999955	185	0	1.5193
Ring1	10	0.33885	0.66791	0.999995	438	6	-0.14172	0.40021	0.39808	0.999955	267	0	-0.14172
Pgls	11	0.34078	0.67582	0.999995	439	6	-0.14776	0.6274	0.62698	0.999955	414	0	-0.14776
Tdrd5	10	0.34105	0.6705	0.999995	440	4	0.21793	0.16995	0.16822	0.999955	107	1	0.21793
Ube2e1	10	0.34436	0.67388	0.999995	441	6	0.063858	0.043492	0.051166	0.999955	32	1	0.063858
Suv39h2	11	0.34774	0.68241	0.999995	442	6	-0.3454	0.63596	0.63518	0.999955	419	0	-0.3454
Kdm7a	6	0.34874	0.61767	0.999995	443	3	0.086164	0.56391	0.56087	0.999955	373	0	0.086164
Sat1	10	0.35217	0.68266	0.999995	444	5	0.037013	0.2248	0.22326	0.999955	139	0	0.037013
Cbx8	10	0.3575	0.68826	0.999995	445	5	0.12282	0.0019273	0.0042107	0.437307	7	1	0.12282
Snai1	11	0.35858	0.6924	0.999995	446	5	0.16007	0.025861	0.039648	0.999955	25	1	0.16007
Kat7	6	0.3635	0.62787	0.999995	447	3	0.4871	0.38824	0.38587	0.999955	257	0	0.4871
H2-T23	10	0.3642	0.69488	0.999995	448	6	0.033329	0.18825	0.18719	0.999955	116	0	0.033329
Ctla4	9	0.36747	0.67664	0.999995	449	5	-0.44345	0.78871	0.78888	0.999955	521	0	-0.44345
Stk11	10	0.36925	0.70011	0.999995	450	5	-0.14454	0.65077	0.64853	0.999955	429	0	-0.14454
Brpf3	9	0.37212	0.68107	0.999995	451	4	0.66065	0.41486	0.41552	0.999955	276	0	0.66065
Hdac10	11	0.37728	0.71004	0.999995	452	6	-0.15393	0.79067	0.78986	0.999955	523	0	-0.15393
Smarcc2	11	0.3776	0.71042	0.999995	453	5	0.36538	0.29632	0.29748	0.999955	190	0	0.36538
Epc1	9	0.37917	0.68757	0.999995	454	5	0.23449	0.84447	0.84443	0.999955	570	0	0.23449
L3mbtl4	6	0.3827	0.64151	0.999995	455	3	-0.27852	0.37167	0.36927	0.999955	243	0	-0.27852
Nfkb1	11	0.3853	0.71704	0.999995	456	4	0.75295	0.59319	0.59281	0.999955	390	0	0.75295
Atad2b	10	0.38696	0.71553	0.999995	457	4	2.2979	0.3549	0.35301	0.999955	230	0	2.2979
Il12a	7	0.38738	0.66505	0.999995	458	3	0.66811	0.044584	0.046733	0.999955	33	1	0.66811
Hat1	10	0.39081	0.71843	0.999995	459	2	1.4978	0.81277	0.81163	0.999955	544	0	1.4978
Ccl12	7	0.39098	0.66841	0.999995	460	4	-0.38853	0.3146	0.31321	0.999955	201	0	-0.38853
Rcor1	9	0.3959	0.70312	0.999995	461	1	1.9971	0.43815	0.43897	0.999955	287	0	1.9971
Trp53	10	0.39695	0.72215	0.999995	462	4	1.1409	0.021018	0.031721	0.999955	23	1	1.1409
Kalrn	10	0.3974	0.72248	0.999995	463	3	0.31879	0.91661	0.91597	0.999955	617	0	0.31879
Prkaa2	10	0.40523	0.7284	0.999995	464	3	1.2411	0.72206	0.72109	0.999955	477	0	1.2411
Sfmbt1	11	0.4058	0.73569	0.999995	465	4	0.83103	0.13457	0.13625	0.999955	85	1	0.83103
Angpt2	10	0.40773	0.73008	0.999995	466	5	0.15297	0.37287	0.37093	0.999955	246	0	0.15297
Smad6	11	0.40897	0.73828	0.999995	467	6	-0.14919	0.17938	0.17987	0.999955	113	1	-0.14919
Jak2	10	0.41108	0.73261	0.999995	468	3	1.0427	0.018491	0.029583	0.999955	21	1	1.0427
Cxcl10	10	0.41307	0.73396	0.999995	469	4	0.50365	0.3796	0.3779	0.999955	249	0	0.50365
Prkab1	9	0.41618	0.72126	0.999995	470	5	-0.19291	0.5112	0.51249	0.999955	338	0	-0.19291
Mllt1	10	0.41844	0.7376	0.999995	471	4	1.0519	0.32932	0.3275	0.999955	209	0	1.0519
Mbd1	10	0.41923	0.73808	0.999995	472	5	0.025428	0.33736	0.3356	0.999955	217	0	0.025428
Tcf20	11	0.42194	0.74942	0.999995	473	6	-0.12122	0.76962	0.76916	0.999955	510	0	-0.12122
Psmb9	11	0.42365	0.75087	0.999995	474	6	-0.010988	0.38621	0.38614	0.999955	254	0	-0.010988
Il6	9	0.42444	0.72845	0.999995	475	4	0.34659	0.43954	0.44011	0.999955	289	0	0.34659
Cd28	11	0.42502	0.75214	0.999995	476	6	-0.11255	0.83978	0.83957	0.999955	563	0	-0.11255
Ccl2	10	0.42758	0.74425	0.999995	477	5	-0.010994	0.23496	0.2333	0.999955	147	0	-0.010994
Stat4	9	0.43427	0.73682	0.999995	478	5	-0.30564	0.92179	0.92196	0.999955	625	0	-0.30564
Stat5b	10	0.43689	0.75086	0.999995	479	5	0.34998	0.23899	0.23731	0.999955	152	0	0.34998
Sirt5	10	0.44021	0.75317	0.999995	480	5	-0.012051	0.29817	0.29585	0.999955	191	0	-0.012051
Hmga1	6	0.44078	0.68519	0.999995	481	3	-0.16467	0.80891	0.80766	0.999955	541	0	-0.16467
Hdgfrp2	10	0.44187	0.7545	0.999995	482	4	0.48125	0.62288	0.62138	0.999955	410	0	0.48125
Lef1	10	0.44372	0.75585	0.999995	483	5	-0.056496	0.71466	0.71353	0.999955	469	0	-0.056496
Jarid2	11	0.45651	0.77748	0.999995	484	5	0.85862	0.50347	0.50358	0.999955	332	0	0.85862
H2-Q4	10	0.45913	0.76616	0.999995	485	4	0.50171	0.38377	0.38198	0.999955	250	0	0.50171
Hspbap1	10	0.46391	0.76935	0.999995	486	4	0.48715	0.0081325	0.015522	0.808353	12	2	0.48715
Scmh1	10	0.46501	0.77007	0.999995	487	3	0.73851	0.57607	0.57517	0.999955	378	0	0.73851
Nat6	10	0.46584	0.77077	0.999995	488	4	0.52074	0.94354	0.94292	0.999955	645	0	0.52074
Tnfrsf9	11	0.46634	0.78509	0.999995	489	5	1.127	0.15421	0.15575	0.999955	98	1	1.127
Phf21a	11	0.47137	0.789	0.999995	490	4	0.87553	0.53754	0.5382	0.999955	354	0	0.87553
Gfi1b	9	0.47233	0.76912	0.999995	491	5	0.010959	0.15534	0.15622	0.999955	100	1	0.010959
Prmt8	9	0.47833	0.77404	0.999995	492	5	0.022027	0.95673	0.95635	0.999955	662	0	0.022027
H2-Q10	8	0.48184	0.75637	0.999995	493	4	0.14567	0.14474	0.14431	0.999955	93	0	0.14567
Kmt2c	6	0.48248	0.71577	0.999995	494	3	0.011546	0.41786	0.41546	0.999955	278	0	0.011546
Prmt10	10	0.48566	0.78466	0.999995	495	5	0.32168	0.247	0.24535	0.999955	159	0	0.32168
Smarca2	6	0.48928	0.72091	0.999995	496	3	0.0306	0.68313	0.6809	0.999955	445	0	0.0306
Ezh1	11	0.49201	0.80465	0.999995	497	4	0.84296	0.66269	0.66165	0.999955	435	0	0.84296
H2-DMb2	10	0.49573	0.79175	0.999995	498	4	0.21329	0.091781	0.094262	0.999955	62	1	0.21329
H2-Q1	9	0.50236	0.79239	0.999995	499	3	0.18487	0.89357	0.89387	0.999955	602	0	0.18487
Ido1	10	0.51346	0.80337	0.999995	500	4	1.5509	0.5947	0.59354	0.999955	392	0	1.5509
Suds3	8	0.51702	0.78119	0.999995	501	4	0.2498	0.19201	0.19078	0.999955	118	0	0.2498
Tdrd6	11	0.51933	0.82133	0.999995	502	3	0.86282	0.12835	0.13029	0.999955	80	1	0.86282
Cd4	10	0.52158	0.80885	0.999995	503	5	0.077618	0.81921	0.81827	0.999955	549	0	0.077618
Ednrb	11	0.52281	0.82325	0.999995	504	5	0.71842	0.29939	0.30051	0.999955	193	0	0.71842
Pwwp2b	9	0.52927	0.80717	0.999995	505	4	1.1013	0.097889	0.099527	0.999955	65	1	1.1013
Gm8909	11	0.5368	0.831	0.999995	506	5	1.47	0.652	0.65097	0.999955	430	0	1.47
Whsc1	10	0.53713	0.81879	0.999995	507	3	0.97817	0.27444	0.27187	0.999955	179	0	0.97817
Cd40	9	0.53925	0.81252	0.999995	508	4	0.36701	0.70817	0.70997	0.999955	461	0	0.36701
Kdm6a	11	0.53999	0.83233	0.999995	509	4	0.72604	0.29116	0.29231	0.999955	188	0	0.72604
Phf19	11	0.54069	0.83278	0.999995	510	4	1.2942	0.7145	0.71433	0.999955	468	0	1.2942
Fto	10	0.54184	0.82182	0.999995	511	5	0.32697	0.67353	0.6725	0.999955	440	0	0.32697
Smyd5	10	0.54242	0.8222	0.999995	512	3	0.55709	0.069124	0.074164	0.999955	49	1	0.55709
Sp110	9	0.54347	0.81474	0.999995	513	3	0.46089	0.8783	0.87842	0.999955	589	0	0.46089
Smarcal1	10	0.54571	0.82435	0.999995	514	3	0.80368	0.38957	0.38805	0.999955	259	0	0.80368
Hdac11	10	0.54658	0.82486	0.999995	515	2	1.9272	0.21244	0.21117	0.999955	134	0	1.9272
Bcor	10	0.54867	0.82614	0.999995	516	4	0.27627	0.65474	0.65259	0.999955	432	0	0.27627
Arid1b	10	0.55435	0.82981	0.999995	517	4	0.68301	0.6266	0.62516	0.999955	412	0	0.68301
Hdac6	11	0.55452	0.84048	0.999995	518	3	0.9462	0.51897	0.51957	0.999955	343	0	0.9462
Smarca1	11	0.55464	0.84056	0.999995	519	5	0.73342	0.71676	0.71643	0.999955	472	0	0.73342
H2-Oa	10	0.5552	0.83038	0.999995	520	2	0.88707	0.092959	0.095529	0.999955	63	1	0.88707
Lrp6	11	0.55777	0.84227	0.999995	521	5	0.06038	0.98496	0.98527	0.999955	686	0	0.06038
Arg2	10	0.55951	0.83327	0.999995	522	5	0.021753	0.15127	0.15017	0.999955	95	1	0.021753
Suv420h2	9	0.56289	0.82459	0.999995	523	4	0.52993	0.26938	0.2701	0.999955	174	0	0.52993
Cdyl2	9	0.56469	0.82542	0.999995	524	4	0.53318	0.75582	0.75632	0.999955	498	0	0.53318
Cd86	10	0.56647	0.83803	0.999995	525	5	0.14449	0.79742	0.79649	0.999955	530	0	0.14449
L3mbtl1	10	0.56881	0.83935	0.999995	526	2	0.90196	0.46939	0.46677	0.999955	312	0	0.90196
Map2k2	10	0.56949	0.83978	0.999995	527	2	1.9308	0.034808	0.043507	0.999955	28	1	1.9308
Tinagl1	9	0.5697	0.82822	0.999995	528	3	0.10706	0.29098	0.29183	0.999955	187	0	0.10706
Piwil2	10	0.57165	0.8414	0.999995	529	5	0.30478	0.62073	0.61937	0.999955	406	0	0.30478
Tnrc18	11	0.57191	0.85012	0.999995	530	4	0.62624	0.077084	0.083743	0.999955	53	1	0.62624
Csf2	10	0.57204	0.84168	0.999995	531	4	0.38114	0.41227	0.40993	0.999955	273	0	0.38114
Dxo	6	0.5728	0.78205	0.999995	532	3	0.0044477	0.94775	0.94852	0.999955	652	0	0.0044477
Sirt7	9	0.57826	0.83275	0.999995	533	3	1.6094	0.75648	0.75693	0.999955	500	0	1.6094
Phf14	9	0.57946	0.83346	0.999995	534	4	1.6505	0.47254	0.47299	0.999955	313	0	1.6505
Hdgf	11	0.58245	0.85559	0.999995	535	3	2.4404	0.26486	0.26552	0.999955	170	0	2.4404
Psmb10	10	0.58301	0.84885	0.999995	536	4	0.44108	0.70236	0.70103	0.999955	456	0	0.44108
Il13	10	0.5847	0.85002	0.999995	537	5	-0.031973	0.96224	0.96094	0.999955	665	0	-0.031973
Snd1	11	0.585	0.85674	0.999995	538	4	1.5416	0.2073	0.20717	0.999955	130	0	1.5416
Pick1	10	0.58507	0.85022	0.999995	539	4	0.51009	0.34618	0.34442	0.999955	223	0	0.51009
Mael	11	0.5867	0.85755	0.999995	540	5	0.043723	0.21187	0.21187	0.999955	133	0	0.043723
Usp22	10	0.59981	0.85941	0.999995	541	1	2.2988	0.081111	0.084733	0.999955	58	1	2.2988
Mum1	10	0.60486	0.86247	0.999995	542	4	0.40383	0.95398	0.95292	0.999955	660	0	0.40383
Hdgfl1	10	0.60504	0.86259	0.999995	543	5	0.18806	0.57785	0.57702	0.999955	379	0	0.18806
Kat6a	6	0.60851	0.80803	0.999995	544	3	0.42477	0.14304	0.1428	0.999955	91	0	0.42477
Ltbr	10	0.6108	0.86605	0.999995	545	5	0.23836	0.84134	0.84027	0.999955	565	0	0.23836
Hmga1-rs1	7	0.61108	0.82553	0.999995	546	3	0.53138	0.6226	0.62425	0.999955	409	0	0.53138
Arg1	11	0.61136	0.87034	0.999995	547	5	0.9997	0.62798	0.6275	0.999955	415	0	0.9997
Prdm4	10	0.61272	0.86736	0.999995	548	5	0.03601	0.75436	0.75312	0.999955	497	0	0.03601
Trerf1	6	0.61604	0.81325	0.999995	549	3	0.035058	0.071462	0.072422	0.999955	50	1	0.035058
Kdr	11	0.61748	0.87306	0.999995	550	3	0.37329	0.64544	0.64454	0.999955	425	0	0.37329
Dnmt3b	11	0.61937	0.87406	0.999995	551	5	0.07591	0.035487	0.048099	0.999955	29	1	0.07591
Nkx2-1	11	0.62733	0.87833	0.999995	552	5	0.040875	0.30348	0.3046	0.999955	194	0	0.040875
Tcf3	11	0.63194	0.88038	0.999995	553	5	0.11883	0.22655	0.22672	0.999955	140	0	0.11883
Kdm1b	11	0.63378	0.88132	0.999995	554	5	0.09319	0.027242	0.040647	0.999955	26	1	0.09319
Slc38a1	9	0.64425	0.86793	0.999995	555	4	0.56056	0.26411	0.26496	0.999955	169	0	0.56056
Dido1	11	0.64501	0.88691	0.999995	556	5	1.5415	0.062514	0.071314	0.999955	45	1	1.5415
Vegfa	11	0.64654	0.88774	0.999995	557	4	0.76277	0.39073	0.39058	0.999955	261	0	0.76277
Cd80	11	0.64663	0.88776	0.999995	558	5	0.97936	0.23878	0.23913	0.999955	151	0	0.97936
Il10	9	0.64817	0.8699	0.999995	559	3	0.73014	0.39294	0.39348	0.999955	263	0	0.73014
Il2	9	0.64905	0.87032	0.999995	560	4	0.046095	0.70152	0.70342	0.999955	455	0	0.046095
Satb1	10	0.65235	0.88494	0.999995	561	3	1.1954	0.13222	0.13179	0.999955	82	1	1.1954
Ptprc	6	0.65426	0.84066	0.999995	562	2	0.89604	0.48426	0.48194	0.999955	322	0	0.89604
Ehmt1	6	0.6549	0.84123	0.999995	563	2	1.1533	0.10081	0.10144	0.999955	69	1	1.1533
Fbxl19	11	0.65951	0.89363	0.999995	564	4	1.0577	0.52404	0.52465	0.999955	344	0	1.0577
Flt1	10	0.66044	0.88813	0.999995	565	4	0.85186	0.202	0.20098	0.999955	128	0	0.85186
Prdm15	11	0.66364	0.8959	0.999995	566	5	0.24649	0.59068	0.59023	0.999955	387	0	0.24649
Map3k12	11	0.66902	0.89869	0.999995	567	5	0.36245	0.8653	0.86521	0.999955	585	0	0.36245
H2-M3	9	0.67253	0.88267	0.999995	568	4	0.02423	0.13317	0.13453	0.999955	83	1	0.02423
Kat2a	11	0.68565	0.90714	0.999995	569	2	0.90338	0.54034	0.54099	0.999955	356	0	0.90338
Epas1	11	0.68614	0.90746	0.999995	570	3	1.0525	0.47821	0.47861	0.999955	318	0	1.0525
Smarcd3	11	0.68813	0.9085	0.999995	571	3	1.2961	0.22094	0.22107	0.999955	138	0	1.2961
Gzmn	9	0.69337	0.89367	0.999995	572	4	0.30882	0.56309	0.56391	0.999955	371	0	0.30882
Bahcc1	11	0.69586	0.91216	0.999995	573	5	0.088019	0.89589	0.89584	0.999955	605	0	0.088019
Stat6	11	0.69778	0.91293	0.999995	574	2	1.199	0.11957	0.12242	0.999955	78	1	1.199
Jade1	6	0.70218	0.85972	0.999995	575	1	1.5754	0.34175	0.34041	0.999955	221	0	1.5754
Bahd1	11	0.70274	0.91517	0.999995	576	2	1.3163	0.74093	0.74061	0.999955	493	0	1.3163
Vegfc	9	0.70574	0.89995	0.999995	577	4	0.3505	0.038112	0.043546	0.999955	31	1	0.3505
Cbx5	8	0.70628	0.88899	0.999995	578	3	0.43938	0.70394	0.705	0.999955	459	0	0.43938
Setd6	11	0.70671	0.91684	0.999995	579	4	0.56717	0.83654	0.83622	0.999955	562	0	0.56717
Tcf19	11	0.70948	0.9181	0.999995	580	2	1.1755	0.10305	0.10662	0.999955	71	1	1.1755
Trim28	9	0.71008	0.90205	0.999995	581	4	0.92461	0.33168	0.33252	0.999955	212	0	0.92461
Ctcfl	10	0.71036	0.90848	0.999995	582	4	1.0088	0.61205	0.61021	0.999955	400	0	1.0088
Sirt2	11	0.7116	0.91906	0.999995	583	4	0.26569	0.051787	0.062091	0.999955	39	1	0.26569
Baz2a	10	0.7128	0.90929	0.999995	584	3	1.2598	0.11394	0.11509	0.999955	76	1	1.2598
Padi4	10	0.71299	0.90935	0.999995	585	3	1.1217	0.78934	0.78787	0.999955	522	0	1.1217
Dpf1	10	0.71838	0.9117	0.999995	586	4	1.336	0.44187	0.43918	0.999955	291	0	1.336
Hif1a	11	0.71948	0.92262	0.999995	587	3	1.0457	0.024479	0.03848	0.999955	24	1	1.0457
Tgfb3	10	0.72052	0.9127	0.999995	588	4	0.73368	0.59356	0.59228	0.999955	391	0	0.73368
Asf1a	8	0.72054	0.89454	0.999995	589	2	0.52889	0.46362	0.4633	0.999955	306	0	0.52889
H2-Eb1	10	0.72136	0.91307	0.999995	590	4	0.351	0.68326	0.68218	0.999955	446	0	0.351
Cdyl	11	0.72958	0.9269	0.999995	591	4	0.57614	0.58245	0.58216	0.999955	381	0	0.57614
Prmt3	10	0.72968	0.9166	0.999995	592	4	1.1164	0.12541	0.1259	0.999955	79	1	1.1164
Tap1	9	0.73836	0.91612	0.999995	593	3	0.34078	0.45794	0.45825	0.999955	298	0	0.34078
Setd1b	6	0.73855	0.87454	0.999995	594	2	0.63144	0.58991	0.58782	0.999955	386	0	0.63144
Kdm4b	9	0.74435	0.91933	0.999995	595	3	0.85184	0.1084	0.10981	0.999955	74	1	0.85184
Nap1l5	10	0.74791	0.92372	0.999995	596	3	0.87348	0.92195	0.92125	0.999955	626	0	0.87348
Btg3	7	0.74924	0.9006	0.999995	597	3	1.2327	0.54139	0.5435	0.999955	357	0	1.2327
Fos	10	0.75797	0.92755	0.999995	598	1	1.2882	0.04596	0.053363	0.999955	35	1	1.2882
Jmjd7	10	0.759	0.92796	0.999995	599	2	1.4155	0.078725	0.082546	0.999955	55	1	1.4155
Cd70	11	0.75975	0.93588	0.999995	600	4	0.2254	0.64928	0.64826	0.999955	428	0	0.2254
Tdo2	10	0.76029	0.92836	0.999995	601	3	0.41653	0.68417	0.68311	0.999955	447	0	0.41653
Tnfrsf14	10	0.76641	0.93069	0.999995	602	4	0.93758	0.241	0.23915	0.999955	154	0	0.93758
Kdm4a	10	0.76682	0.93092	0.999995	603	3	0.95889	0.58781	0.58658	0.999955	384	0	0.95889
Phf3	11	0.76768	0.93825	0.999995	604	3	1.9971	0.15178	0.1533	0.999955	96	1	1.9971
Hif3a	10	0.76886	0.93178	0.999995	605	3	1.688	0.27154	0.26907	0.999955	175	0	1.688
Kmt2e	6	0.77251	0.88934	0.999995	606	2	1.0824	0.72974	0.72834	0.999955	483	0	1.0824
Setd5	11	0.77588	0.94055	0.999995	607	3	1.8252	0.24538	0.24591	0.999955	158	0	1.8252
Tdrd9	11	0.77876	0.94142	0.999995	608	3	0.6209	0.49213	0.49216	0.999955	327	0	0.6209
Trim33	10	0.78742	0.9392	0.999995	609	3	1.1481	0.80434	0.80317	0.999955	538	0	1.1481
Asf1b	10	0.78812	0.93956	0.999995	610	4	0.3963	0.79435	0.79323	0.999955	525	0	0.3963
Mllt6	10	0.7887	0.93978	0.999995	611	2	2.2819	0.31573	0.31368	0.999955	203	0	2.2819
Mbd3	10	0.7896	0.94017	0.999995	612	3	2.6801	0.27924	0.27696	0.999955	180	0	2.6801
Mr1	10	0.78984	0.94025	0.999995	613	3	0.95039	0.61912	0.61782	0.999955	404	0	0.95039
Pdcd1	11	0.79165	0.94511	0.999995	614	3	1.588	0.081022	0.087157	0.999955	57	1	1.588
Lgals9	11	0.79439	0.94607	0.999995	615	4	1.2028	0.50273	0.50297	0.999955	331	0	1.2028
Tdrd1	11	0.79498	0.94633	0.999995	616	4	0.83099	0.11325	0.11668	0.999955	75	1	0.83099
Dpf3	11	0.79685	0.94698	0.999995	617	3	0.74735	0.41811	0.41876	0.999955	279	0	0.74735
Tada3	11	0.79806	0.94737	0.999995	618	3	0.40756	0.20615	0.20607	0.999955	129	0	0.40756
Rab33b	10	0.80207	0.94505	0.999995	619	3	0.58153	0.5616	0.5601	0.999955	370	0	0.58153
Kat5	10	0.80655	0.9467	0.999995	620	4	0.54707	0.76783	0.76641	0.999955	508	0	0.54707
Hdac5	11	0.81267	0.95219	0.999995	621	2	1.4046	0.34411	0.34472	0.999955	222	0	1.4046
Prdm11	9	0.81747	0.94252	0.999995	622	3	0.22578	0.95448	0.95426	0.999955	661	0	0.22578
Il4	9	0.82276	0.94436	0.999995	623	2	2.0528	0.66577	0.66669	0.999955	436	0	2.0528
Control	712	0.82401	0.95577	0.999995	624	312	0.34512	0.31008	0.31082	0.999955	199	15	0.34512
Phrf1	10	0.82547	0.95414	0.999995	625	4	1.1184	0.7265	0.72574	0.999955	481	0	1.1184
Rai1	10	0.83125	0.95602	0.999995	626	3	0.64521	0.44793	0.44529	0.999955	295	0	0.64521
Hdac8	8	0.83508	0.94383	0.999995	627	2	1.7727	0.68499	0.68608	0.999955	448	0	1.7727
Smyd1	10	0.83524	0.95696	0.999995	628	2	0.30277	0.37118	0.36925	0.999955	241	0	0.30277
Deaf1	9	0.83748	0.94908	0.999995	629	2	1.1568	0.8321	0.8318	0.999955	560	0	1.1568
Gm7030	9	0.83931	0.94966	0.999995	630	1	1.4439	0.35946	0.36013	0.999955	237	0	1.4439
Tgfb1	11	0.84714	0.96289	0.999995	631	4	0.38943	0.69825	0.69791	0.999955	454	0	0.38943
Tnfsf4	11	0.85042	0.96388	0.999995	632	3	1.5076	0.073131	0.080369	0.999955	51	1	1.5076
Prdm13	11	0.85319	0.96484	0.999995	633	2	1.4887	0.61393	0.61339	0.999955	402	0	1.4887
Ing1	11	0.85489	0.9653	0.999995	634	3	0.89498	0.7221	0.72155	0.999955	478	0	0.89498
Kir3dl2	8	0.85538	0.95311	0.999995	635	3	1.4384	0.18945	0.18815	0.999955	117	0	1.4384
Mta3	9	0.85646	0.95551	0.999995	636	3	1.1596	0.52571	0.52692	0.999955	346	0	1.1596
Vtcn1	10	0.85672	0.96154	0.999995	637	3	0.37936	0.80316	0.80211	0.999955	534	0	0.37936
Ccl17	9	0.86271	0.95763	0.999995	638	2	1.6173	0.39516	0.3957	0.999955	265	0	1.6173
Adora1	11	0.86276	0.96784	0.999995	639	1	1.0862	0.24319	0.24373	0.999955	157	0	1.0862
Cxcr4	11	0.86285	0.96785	0.999995	640	2	1.6386	0.49366	0.49354	0.999955	328	0	1.6386
Nat8l	9	0.86358	0.95797	0.999995	641	3	0.8257	0.88285	0.8832	0.999955	593	0	0.8257
Nt5e	10	0.86444	0.96346	0.999995	642	2	1.566	0.18505	0.184	0.999955	114	0	1.566
Ptger2	10	0.86508	0.96367	0.999995	643	1	1.4181	0.58838	0.58719	0.999955	385	0	1.4181
Nfe2l2	9	0.86528	0.95861	0.999995	644	3	0.14547	0.54904	0.55044	0.999955	361	0	0.14547
Smad3	11	0.86605	0.96885	0.999995	645	4	0.7481	0.26379	0.26452	0.999955	168	0	0.7481
B2m	10	0.86709	0.96415	0.999995	646	2	1.5059	0.46721	0.46463	0.999955	308	0	1.5059
Ado	10	0.86823	0.96442	0.999995	647	2	1.2289	0.1	0.10197	0.999955	68	1	1.2289
Il17a	9	0.8684	0.95972	0.999995	648	2	1.8841	0.19817	0.19912	0.999955	126	0	1.8841
H2-Q6	10	0.87432	0.96598	0.999995	649	2	0.42333	0.78551	0.784	0.999955	519	0	0.42333
Havcr2	9	0.87468	0.96202	0.999995	650	3	1.2876	0.44436	0.44507	0.999955	292	0	1.2876
Cd74	9	0.87849	0.96345	0.999995	651	3	1.1205	0.048128	0.052581	0.999955	36	1	1.1205
Mmp9	11	0.88161	0.9737	0.999995	652	3	1.396	0.17819	0.17867	0.999955	112	1	1.396
Stat3	11	0.88328	0.97429	0.999995	653	4	0.75781	0.70345	0.70302	0.999955	458	0	0.75781
Tnfrsf4	9	0.88663	0.96653	0.999995	654	3	0.11592	0.62238	0.62316	0.999955	408	0	0.11592
Gm6251	6	0.88715	0.94677	0.999995	655	2	0.64637	0.73944	0.73828	0.999955	492	0	0.64637
Stat5a	9	0.88886	0.96742	0.999995	656	3	0.42382	0.78282	0.78274	0.999955	517	0	0.42382
Cd276	9	0.88989	0.96787	0.999995	657	3	0.43021	0.35712	0.35778	0.999955	232	0	0.43021
Mapk1	9	0.89091	0.96817	0.999995	658	3	1.9082	0.17797	0.17954	0.999955	111	0	1.9082
Suv39h1	9	0.89227	0.96861	0.999995	659	2	0.40739	0.38772	0.38841	0.999955	256	0	0.40739
Wt1	10	0.89361	0.97101	0.999995	660	3	1.2659	0.41068	0.40842	0.999955	270	0	1.2659
Pdcd1lg2	11	0.89478	0.97668	0.999995	661	2	1.1235	0.70856	0.70823	0.999955	462	0	1.1235
Npcd	6	0.89576	0.94997	0.999995	662	1	0.64912	0.56968	0.56691	0.999955	375	0	0.64912
Asxl3	9	0.904	0.97262	0.999995	663	3	1.7448	0.81836	0.81848	0.999955	547	0	1.7448
Supt7l	9	0.90439	0.97277	0.999995	664	3	1.3785	0.37182	0.37203	0.999955	244	0	1.3785
Jak3	11	0.90442	0.97847	0.999995	665	2	0.89586	0.48521	0.48526	0.999955	323	0	0.89586
Hmg20b	11	0.90673	0.97892	0.999995	666	2	2.2625	0.33635	0.33716	0.999955	215	0	2.2625
Irf4	10	0.90891	0.97562	0.999995	667	3	0.49491	0.76921	0.76783	0.999955	509	0	0.49491
Naa60	6	0.91124	0.95351	0.999995	668	1	2.0042	0.07436	0.075114	0.999955	52	1	2.0042
Socs6	10	0.91182	0.97641	0.999995	669	2	1.8657	0.029813	0.039281	0.999955	27	1	1.8657
Jade2	6	0.91951	0.95555	0.999995	670	1	0.75925	0.28829	0.28749	0.999955	186	0	0.75925
Eng	10	0.9246	0.98038	0.999995	671	3	1.5314	0.51747	0.51556	0.999955	342	0	1.5314
Foxp3	10	0.93684	0.98399	0.999995	672	3	0.93622	0.82277	0.82192	0.999955	551	0	0.93622
Grn	10	0.93719	0.98413	0.999995	673	2	1.4591	0.53841	0.53704	0.999955	355	0	1.4591
Ubr7	10	0.93779	0.98434	0.999995	674	2	0.80605	0.4606	0.45838	0.999955	303	0	0.80605
Arnt2	6	0.93781	0.96067	0.999995	675	1	0.52662	0.82682	0.82546	0.999955	555	0	0.52662
Pml	11	0.9384	0.98564	0.999995	676	3	0.81741	0.62683	0.62648	0.999955	413	0	0.81741
Kdm3b	11	0.94043	0.98612	0.999995	677	3	0.72959	0.15664	0.1578	0.999955	101	1	0.72959
Sirt1	11	0.94753	0.98793	0.999995	678	2	0.74559	0.80231	0.80253	0.999955	533	0	0.74559
Relb	11	0.94818	0.98804	0.999995	679	2	4.1288	0.50795	0.50827	0.999955	336	0	4.1288
Icos	8	0.95004	0.98023	0.999995	680	2	0.77739	0.71578	0.71672	0.999955	471	0	0.77739
Jak1	11	0.95173	0.98885	0.999995	681	3	1.1706	0.46072	0.46148	0.999955	304	0	1.1706
Adora2a	11	0.95215	0.98896	0.999995	682	1	2.157	0.35463	0.35538	0.999955	229	0	2.157
Pcgf1	11	0.95577	0.98981	0.999995	683	2	4.3056	0.00057293	0.0017664	0.256835	5	3	4.3056
Dpep1	11	0.95602	0.98987	0.999995	684	2	0.5745	0.68515	0.68503	0.999955	449	0	0.5745
Psmb8	10	0.958	0.98861	0.999995	685	2	0.75152	0.82031	0.81937	0.999955	550	0	0.75152
4632428N05Rik	11	0.96097	0.99111	0.999995	686	3	0.82273	0.79473	0.79442	0.999955	526	0	0.82273
Flt4	11	0.96409	0.9921	0.999995	687	3	1.8306	0.47585	0.47622	0.999955	314	0	1.8306
Vegfb	9	0.96427	0.98705	0.999995	688	2	1.3773	0.58742	0.58811	0.999955	383	0	1.3773
Nos2	11	0.96508	0.99234	0.999995	689	3	0.43211	0.92739	0.92649	0.999955	633	0	0.43211
Tsc1	10	0.97475	0.99221	0.999995	690	1	4.1112	6.4199e-06	1.4844e-05	0.003597	3	4	4.1112
Zfp57	10	0.97517	0.99227	0.999995	691	2	1.024	0.065501	0.071077	0.999955	46	1	1.024
Rnf40	9	0.97594	0.99107	0.999995	692	2	1.7566	0.34848	0.3493	0.999955	224	0	1.7566
Tnfsf9	11	0.97714	0.99441	0.999995	693	2	1.3955	0.21641	0.21647	0.999955	136	0	1.3955
Ep300	11	0.97802	0.99455	0.999995	694	2	2.264	0.64379	0.64256	0.999955	423	0	2.264
Smad4	9	0.97921	0.99231	0.999995	695	1	1.2405	0.63627	0.63733	0.999955	420	0	1.2405
Cbx6	10	0.97922	0.99333	0.999995	696	1	2.2457	0.055776	0.062645	0.999955	41	1	2.2457
Nf2	11	0.98096	0.99511	0.999995	697	1	8.371	7.5987e-14	4.9479e-06	0.001799	1	8	8.371
Slc26a1	11	0.9849	0.99587	0.999995	698	2	1.2087	0.13581	0.13747	0.999955	86	1	1.2087
Mapk3	11	0.98539	0.99601	0.999995	699	2	1.6917	0.19461	0.19492	0.999955	121	0	1.6917
Cd274	11	0.9864	0.99626	0.999995	700	2	1.673	0.55479	0.55522	0.999955	364	0	1.673
Dot1l	11	0.9866	0.9963	0.999995	701	2	1.1346	0.76549	0.765	0.999955	507	0	1.1346
Phf10	10	0.98714	0.99557	0.999995	702	2	0.53615	0.24201	0.24021	0.999955	155	0	0.53615
Tapbp	11	0.9879	0.99662	0.999995	703	2	0.89627	0.21414	0.21426	0.999955	135	0	0.89627
Satb2	10	0.98876	0.9962	0.999995	704	2	1.1757	0.5148	0.51296	0.999955	340	0	1.1757
Gmeb1	10	0.989	0.99627	0.999995	705	1	0.92033	0.88667	0.88646	0.999955	595	0	0.92033
Map2k1	9	0.99158	0.99499	0.999995	706	1	1.8402	0.17603	0.17752	0.999955	110	0	1.8402
Kdm1a	11	0.99168	0.99755	0.999995	707	1	3.0038	0.34024	0.34084	0.999955	219	0	3.0038
Traf7	6	0.99175	0.99156	0.999995	708	0	0.62292	0.63337	0.63112	0.999955	418	0	0.62292
Lrp5	9	0.99184	0.99506	0.999995	709	1	1.172	0.38697	0.38772	0.999955	255	0	1.172
Ube2a	11	0.99191	0.99759	0.999995	710	2	1.8463	0.35273	0.35347	0.999955	226	0	1.8463
Proc	9	0.99397	0.99578	0.999995	711	1	1.033	0.20763	0.20863	0.999955	131	0	1.033
Adora2b	9	0.99742	0.99761	0.999995	712	1	1.8569	0.43885	0.43947	0.999955	288	0	1.8569
Hira	11	0.99799	0.99893	0.999995	713	1	0.8179	0.27231	0.27294	0.999955	177	0	0.8179
Mier2	11	0.9982	0.99899	0.999995	714	1	1.5851	0.16147	0.1627	0.999955	103	1	1.5851
Rb1	11	0.9983	0.999	0.999995	715	1	2.8003	0.010555	0.020014	0.808353	16	2	2.8003
Taf6l	9	0.99866	0.99848	0.999995	716	0	2.4267	0.099999	0.10143	0.999955	67	1	2.4267
Ccr4	10	0.99939	0.99937	0.999995	717	0	1.4301	0.7273	0.72644	0.999955	482	0	1.4301
Taf5l	11	0.9994	0.99948	0.999995	718	1	2.34	0.31158	0.31232	0.999955	200	0	2.34
Tada1	10	0.99941	0.99939	0.999995	719	0	1.8844	0.1546	0.15347	0.999955	99	1	1.8844
Pten	11	0.99959	0.99964	0.999995	720	0	4.8845	0.014212	0.026526	0.964209	18	2	4.8845
Paxip1	9	0.9996	0.99953	0.999995	721	0	0.83345	0.8158	0.81595	0.999955	545	0	0.83345
Apc	8	0.99971	0.99964	0.999995	722	0	2.9188	0.015836	0.023349	0.893412	20	1	2.9188
Tada2b	10	0.99988	0.99982	0.999995	723	0	2.4408	0.044727	0.052225	0.999955	34	1	2.4408
Sirt6	9	0.99999	0.99999	0.999995	724	0	2.3101	0.11569	0.1169	0.999955	77	1	2.3101
Kdm2b	11	1	1	0.999995	725	0	5.1453	0.00076941	0.0023503	0.284772	6	3	5.1453
Tsc2	9	1	1	0.999995	726	0	5.4062	0.0093746	0.017016	0.808353	13	2	5.4062
Fbxw7	11	1	1	0.999995	727	0	7.1207	4.3217e-08	4.9479e-06	0.001799	2	5	7.1207

## Sheet: In vivo B6 WT mice
id	num	neg|score	neg|p-value	neg|fdr	neg|rank	neg|goodsgrna	neg|lfc	pos|score	pos|p-value	pos|fdr	pos|rank	pos|goodsgrna	pos|lfc
Carm1	10	1.9236e-05	0.00013359	0.068345	1	10	-2.0069	0.9996	0.99955	0.999955	723	0	-2.0069
Kat8	10	4.2528e-05	0.00039088	0.068345	2	10	-1.2705	0.99996	0.99996	0.999955	727	0	-1.2705
Uhrf1	11	5.2974e-05	0.00043047	0.068345	3	10	-2.3065	0.48598	0.486	0.999955	326	0	-2.3065
Morf4l1	9	5.3031e-05	0.00043047	0.068345	4	8	-2.5219	0.98397	0.98406	0.999955	697	0	-2.5219
Terf2	11	5.7394e-05	0.00047005	0.068345	5	10	-1.6392	0.10943	0.10958	0.999955	71	0	-1.6392
Phf20	9	0.0001016	0.00079661	0.096523	6	7	-1.8198	0.87005	0.86967	0.999955	594	0	-1.8198
Npm1	10	0.00012352	0.0011628	0.099146	7	10	-1.5805	0.99975	0.99969	0.999955	725	0	-1.5805
Dpf2	11	0.00013636	0.0012716	0.099146	8	11	-1.8729	0.99957	0.99961	0.999955	722	0	-1.8729
Hdac3	10	0.00016345	0.0014299	0.099146	9	9	-2.4039	0.91167	0.91082	0.999955	627	0	-2.4039
Brd4	10	0.00021953	0.0018654	0.099146	10	9	-1.7289	0.34968	0.34789	0.999955	231	0	-1.7289
Crebbp	11	0.00022887	0.0020336	0.099146	11	7	-1.0548	0.13828	0.13856	0.999955	92	0	-1.0548
Aurkb	9	0.00023614	0.0017268	0.099146	12	9	-1.0644	0.99976	0.99971	0.999955	726	0	-1.0644
Dicer1	11	0.00024451	0.0021325	0.099146	13	6	-0.13919	0.34024	0.34084	0.999955	223	0	-0.13919
Elp3	11	0.00025684	0.002182	0.099146	14	9	-1.5397	0.98645	0.9867	0.999955	699	0	-1.5397
Smndc1	8	0.00031838	0.0020633	0.099146	15	8	-1.8428	0.99968	0.99962	0.999955	724	0	-1.8428
Sp140	8	0.00032878	0.0021226	0.099146	16	7	-1.6486	0.16164	0.16137	0.999955	106	0	-1.6486
Yeats4	10	0.00039057	0.0033002	0.141134	17	9	-1.0821	0.53713	0.53575	0.999955	361	0	-1.0821
Map3k7	11	0.00057313	0.0049331	0.188754	18	10	-1.7487	0.90239	0.90204	0.999955	618	0	-1.7487
Cdc5l	11	0.00070708	0.0059127	0.198005	19	9	-1.226	0.88745	0.88769	0.999955	609	0	-1.226
Brd9	11	0.0007205	0.0059919	0.198005	20	9	-1.348	0.99373	0.99386	0.999955	710	0	-1.348
Nelfa	6	0.00076974	0.004181	0.168865	21	5	-2.3104	0.79552	0.79441	0.999955	543	0	-2.3104
Smc1a	10	0.00077859	0.0058336	0.198005	22	9	-1.1077	0.96177	0.96056	0.999955	676	0	-1.1077
Mis18bp1	10	0.00086016	0.0066549	0.201589	23	9	-1.2376	0.9901	0.98973	0.999955	706	0	-1.2376
Smyd3	11	0.00094671	0.0073377	0.205174	24	5	0.11571	0.93985	0.93938	0.999955	651	0	0.11571
Tada2a	9	0.0010125	0.0065955	0.201589	25	5	-1.0526	0.52212	0.52331	0.999955	349	0	-1.0526
Cdc73	9	0.0011062	0.0071101	0.205174	26	7	-1.7324	0.53282	0.53369	0.999955	356	0	-1.7324
Smc2	11	0.0011785	0.0087429	0.215711	27	10	-1.4182	0.7491	0.7488	0.999955	510	0	-1.4182
Mphosph8	9	0.0012765	0.0080601	0.215711	28	8	-1.4627	0.95659	0.95621	0.999955	665	0	-1.4627
Chaf1b	11	0.0013077	0.0096929	0.220211	29	10	-0.90199	0.88169	0.88204	0.999955	602	0	-0.90199
Eif6	11	0.0013696	0.010208	0.224875	30	9	-1.464	0.95098	0.95071	0.999955	661	0	-1.464
Rbbp7	11	0.0014253	0.010544	0.225455	31	9	-1.8043	0.72605	0.72576	0.999955	488	0	-1.8043
Rpl7a	8	0.0014841	0.0089409	0.215711	32	8	-1.1511	0.99852	0.99845	0.999955	721	0	-1.1511
Sf3b3	10	0.0015893	0.011088	0.230319	33	9	-1.1305	0.64169	0.63972	0.999955	428	0	-1.1305
Smc4	11	0.0017089	0.012622	0.247917	34	9	-0.89835	0.93219	0.93119	0.999955	648	0	-0.89835
Elmsan1	6	0.0017357	0.0091091	0.215711	35	4	-1.9895	0.44485	0.4431	0.999955	296	0	-1.9895
Rps17	6	0.0017583	0.0091981	0.215711	36	6	-1.7993	0.99824	0.99833	0.999955	719	0	-1.7993
Mbtd1	10	0.0019299	0.012959	0.247917	37	9	-1.3167	0.99701	0.99682	0.999955	717	0	-1.3167
Mina	11	0.0020229	0.01468	0.266817	38	7	-1.5767	0.98259	0.98258	0.999955	695	0	-1.5767
Ing4	9	0.0023254	0.014324	0.266817	39	8	-1.5113	0.84425	0.84418	0.999955	578	0	-1.5113
Zzz3	11	0.0023399	0.016788	0.290596	40	9	-1.5018	0.25734	0.25792	0.999955	175	0	-1.5018
Stk11	10	0.0023654	0.015363	0.272416	41	8	-1.2117	0.69626	0.69493	0.999955	462	0	-1.2117
Stk31	10	0.0028556	0.018302	0.295042	42	9	-0.6936	0.92722	0.9265	0.999955	640	0	-0.6936
Chmp5	9	0.0028577	0.017372	0.293709	43	7	-1.4428	0.91786	0.91788	0.999955	630	0	-1.4428
Rpl9	5	0.0029164	0.012167	0.245703	44	5	-1.2269	0.99708	0.99677	0.999955	718	0	-1.2269
Gtf3c4	11	0.0029309	0.020509	0.304287	45	9	-1.0409	0.44601	0.44687	0.999955	298	0	-1.0409
Baz1b	10	0.0029434	0.018668	0.295042	46	9	-1.065	0.97174	0.97087	0.999955	685	0	-1.065
Trim24	11	0.0030303	0.021162	0.307698	47	8	-1.1543	0.7401	0.73991	0.999955	503	0	-1.1543
Rpl7	8	0.0030953	0.018213	0.295042	48	7	-1.1116	0.99598	0.99603	0.999955	715	0	-1.1116
Sap130	11	0.0031568	0.021815	0.310975	49	7	-1.4528	0.95251	0.95235	0.999955	663	0	-1.4528
Bptf	10	0.0032613	0.02043	0.304287	50	9	-1.042	0.99456	0.99432	0.999955	713	0	-1.042
Terf1	11	0.0033967	0.023349	0.32171	51	10	-0.66484	0.92031	0.91965	0.999955	631	0	-0.66484
Chd8	11	0.0035308	0.02419	0.32171	52	7	-0.49769	0.27337	0.27412	0.999955	187	0	-0.49769
Alkbh1	11	0.0035594	0.024388	0.32171	53	9	-1.1564	0.71223	0.71194	0.999955	475	0	-1.1564
Noc4l	7	0.0037789	0.020262	0.304287	54	6	-1.3389	0.78631	0.78698	0.999955	537	0	-1.3389
Chd2	11	0.0038177	0.025922	0.32171	55	8	-1.0586	0.82501	0.82504	0.999955	566	0	-1.0586
Phip	11	0.0038918	0.026249	0.32171	56	6	-1.5206	0.82356	0.82373	0.999955	563	0	-1.5206
Arid4b	10	0.0043639	0.026763	0.32171	57	6	-1.6027	0.5492	0.54799	0.999955	370	0	-1.6027
Myb	10	0.0044539	0.027258	0.32171	58	6	-0.99535	0.89922	0.89883	0.999955	614	0	-0.99535
Gars	10	0.0044919	0.027436	0.32171	59	6	-0.87222	0.98826	0.98785	0.999955	702	0	-0.87222
Lrp6	11	0.004643	0.030761	0.349427	60	8	-0.70989	0.45013	0.45122	0.999955	305	0	-0.70989
Smarcc2	11	0.0051462	0.033571	0.368631	61	6	-0.097547	0.44186	0.44274	0.999955	293	0	-0.097547
Suz12	11	0.0055078	0.03557	0.368631	62	8	-1.6652	0.97928	0.97948	0.999955	690	0	-1.6652
Atp6v0c	6	0.0055405	0.02611	0.32171	63	6	-1.2975	0.99446	0.99442	0.999955	712	0	-1.2975
Cbx5	8	0.0056265	0.030444	0.349427	64	4	-0.036481	0.29957	0.29917	0.999955	198	0	-0.036481
Ube2n	9	0.0056657	0.031266	0.349696	65	7	-1.5767	0.93078	0.93098	0.999955	647	0	-1.5767
Atrx	11	0.0056804	0.036431	0.368631	66	7	-1.5303	0.44684	0.44776	0.999955	300	0	-1.5303
Ehmt1	6	0.0057731	0.02711	0.32171	67	2	0.81375	0.048748	0.049355	0.999955	33	0	0.81375
Vhl	11	0.0057838	0.037015	0.368631	68	10	-0.98692	0.92567	0.92475	0.999955	638	0	-0.98692
Prmt1	10	0.005934	0.035254	0.368631	69	7	-1.2031	0.82626	0.82562	0.999955	567	0	-1.2031
Brca2	11	0.0061136	0.038796	0.380869	70	7	-1.4124	0.98692	0.98736	0.999955	701	0	-1.4124
Pygo2	10	0.0061232	0.036154	0.368631	71	7	-1.2266	0.9213	0.92056	0.999955	632	0	-1.2266
Mybl2	9	0.0065826	0.035768	0.368631	72	8	-0.70397	0.20007	0.20108	0.999955	134	0	-0.70397
Taf9	5	0.0066511	0.026051	0.32171	73	5	-1.4327	0.99057	0.98969	0.999955	708	0	-1.4327
Cxxc1	10	0.0068119	0.039509	0.380869	74	7	-1.454	0.94748	0.94657	0.999955	657	0	-1.454
Prr14	11	0.0072453	0.044556	0.408129	75	8	-1.7648	0.98112	0.98102	0.999955	692	0	-1.7648
Chd1	10	0.0073666	0.042527	0.401523	76	9	-0.97216	0.99849	0.9983	0.999955	720	0	-0.97216
Taf5	11	0.0076419	0.046515	0.408129	77	9	-1.2501	0.89945	0.89927	0.999955	616	0	-1.2501
Chaf1a	8	0.0077966	0.039816	0.380869	78	6	-0.93886	0.76177	0.76191	0.999955	516	0	-0.93886
Angpt2	10	0.0078271	0.044823	0.408129	79	5	-0.40199	0.1568	0.1557	0.999955	103	0	-0.40199
Set	6	0.0079719	0.036679	0.368631	80	5	-2.1929	0.96052	0.96108	0.999955	674	0	-2.1929
Dnmt1	11	0.0081524	0.048841	0.408129	81	8	-1.1182	0.73209	0.73205	0.999955	491	0	-1.1182
Vtcn1	10	0.0083277	0.04703	0.408129	82	4	0.1194	0.20932	0.20821	0.999955	141	0	0.1194
Prmt5	9	0.0085921	0.045724	0.408129	83	7	-1.4725	0.96903	0.96901	0.999955	682	0	-1.4725
Prkaa1	9	0.0086438	0.046011	0.408129	84	5	-0.002802	0.94324	0.9432	0.999955	654	0	-0.002802
Smn1	10	0.0086448	0.048722	0.408129	85	7	-1.0554	0.42802	0.42549	0.999955	282	0	-1.0554
Aurka	10	0.0088846	0.050008	0.408293	86	9	-1.4053	0.9255	0.92498	0.999955	637	0	-1.4053
Mier1	9	0.0090324	0.047564	0.408129	87	7	-1.6479	0.96834	0.96844	0.999955	681	0	-1.6479
Hdgfrp3	10	0.0090438	0.05077	0.408293	88	7	-1.4374	0.52279	0.5212	0.999955	350	0	-1.4374
Phb	8	0.0096593	0.047722	0.408129	89	7	-0.9727	0.92739	0.92749	0.999955	641	0	-0.9727
Setd8	9	0.0098128	0.051107	0.408293	90	6	-1.4327	0.90428	0.90469	0.999955	621	0	-1.4327
Chrac1	9	0.010035	0.052265	0.413004	91	7	-1.5414	0.71809	0.71969	0.999955	480	0	-1.5414
Myc	10	0.010051	0.055471	0.416794	92	7	-1.3493	0.22684	0.22544	0.999955	153	0	-1.3493
Csf2	10	0.010107	0.055738	0.416794	93	5	0.2752	0.40828	0.40626	0.999955	271	0	0.2752
Hdac1	8	0.010181	0.049989	0.408293	94	7	-1.4812	0.98887	0.98928	0.999955	703	0	-1.4812
Cdk9	10	0.010244	0.056332	0.416794	95	9	-0.5253	0.9852	0.9848	0.999955	698	0	-0.5253
Yeats2	11	0.010376	0.059004	0.426277	96	9	-1.4627	0.87861	0.87906	0.999955	599	0	-1.4627
Eed	10	0.010877	0.059221	0.426277	97	8	-1.1112	0.98237	0.98201	0.999955	694	0	-1.1112
Jmjd4	9	0.011076	0.056648	0.416794	98	8	-1.0351	0.99564	0.99578	0.999955	714	0	-1.0351
Hdac2	9	0.011107	0.056757	0.416794	99	6	-1.6392	0.65514	0.65634	0.999955	440	0	-1.6392
Dmap1	11	0.011905	0.065664	0.452524	100	8	-1.2035	0.90624	0.90587	0.999955	624	0	-1.2035
Mbd2	11	0.012515	0.068434	0.452524	101	6	-0.37488	0.8821	0.8825	0.999955	604	0	-0.37488
Hmgn3	8	0.012627	0.060072	0.428163	102	7	-1.2719	0.61228	0.61292	0.999955	411	0	-1.2719
Mbd1	10	0.012655	0.066366	0.452524	103	8	-1.6362	0.59413	0.59277	0.999955	398	0	-1.6362
Ezh2	11	0.012661	0.069107	0.452524	104	7	-0.71771	0.9582	0.95811	0.999955	669	0	-0.71771
Mrgbp	6	0.012964	0.05557	0.416794	105	5	-1.8196	0.8342	0.83295	0.999955	570	0	-1.8196
H2-D1	9	0.013001	0.064763	0.452524	106	6	-1.5483	0.71996	0.72147	0.999955	481	0	-1.5483
Smc3	11	0.013043	0.07076	0.452524	107	8	-1.0417	0.9495	0.94892	0.999955	659	0	-1.0417
Phc2	6	0.013212	0.05655	0.416794	108	6	-1.4151	0.98677	0.98661	0.999955	700	0	-1.4151
Setdb1	11	0.013318	0.072046	0.452524	109	9	-1.3603	0.95836	0.95826	0.999955	671	0	-1.3603
Tnfrsf9	11	0.013357	0.072205	0.452524	110	4	0.67665	0.65308	0.65188	0.999955	439	0	0.67665
Rpl32	9	0.013431	0.066772	0.452524	111	7	-1.0409	0.89246	0.89273	0.999955	611	0	-1.0409
Brwd1	9	0.013607	0.067435	0.452524	112	7	-1.518	0.42696	0.42774	0.999955	281	0	-1.518
Rbx1	8	0.013833	0.064733	0.452524	113	6	-1.3274	0.89941	0.89957	0.999955	615	0	-1.3274
Polr2b	10	0.013843	0.071334	0.452524	114	7	-1.2943	0.14123	0.14026	0.999955	93	0	-1.2943
Ttf1	11	0.014284	0.076519	0.466122	115	9	-1.3783	0.98326	0.98335	0.999955	696	0	-1.3783
Atf7ip	10	0.014465	0.073699	0.45406	116	8	-1.5203	0.6381	0.63648	0.999955	427	0	-1.5203
Hltf	11	0.014547	0.077628	0.466122	117	8	-1.2035	0.32357	0.32449	0.999955	214	0	-1.2035
Huwe1	11	0.014679	0.078103	0.466122	118	8	-0.87254	0.21073	0.21074	0.999955	143	0	-0.87254
Kif11	8	0.015021	0.069315	0.452524	119	7	-0.92427	0.3694	0.3694	0.999955	247	0	-0.92427
Ash2l	9	0.015086	0.07362	0.45406	120	5	-1.5208	0.048128	0.047099	0.999955	32	0	-1.5208
Brd8	11	0.015405	0.08123	0.469025	121	9	-1.1162	0.3988	0.39903	0.999955	266	0	-1.1162
Kras	8	0.015621	0.071601	0.452524	122	6	-1.1212	0.95745	0.95737	0.999955	667	0	-1.1212
Dmtf1	10	0.015959	0.07927	0.468532	123	5	0.030449	0.63239	0.63047	0.999955	424	0	0.030449
Rcor2	11	0.016532	0.086168	0.470552	124	4	0.2423	0.054479	0.055421	0.999955	38	0	0.2423
Smarca5	9	0.01687	0.081289	0.469025	125	7	-1.1222	0.84021	0.84032	0.999955	575	0	-1.1222
Pcgf2	10	0.017226	0.084188	0.470552	126	6	-0.77801	0.47446	0.47215	0.999955	322	0	-0.77801
Chmp2a	9	0.017429	0.083803	0.470552	127	7	-1.1554	0.97137	0.97131	0.999955	684	0	-1.1554
Rbbp4	10	0.017717	0.08594	0.470552	128	8	-1.076	0.52805	0.52634	0.999955	353	0	-1.076
Setd1a	10	0.017754	0.086049	0.470552	129	8	-0.85664	0.95917	0.95801	0.999955	673	0	-0.85664
Ptger3	10	0.017783	0.086128	0.470552	130	8	-1.3819	0.73866	0.73791	0.999955	501	0	-1.3819
Dnajc2	11	0.018394	0.094035	0.500053	131	6	-1.0751	0.063847	0.064486	0.999955	42	0	-1.0751
Prpf19	11	0.018438	0.094233	0.500053	132	9	-0.82719	0.040948	0.042032	0.999955	26	0	-0.82719
Rpl23a	7	0.01878	0.078221	0.466122	133	6	-1.2231	0.94833	0.94857	0.999955	658	0	-1.2231
Phf7	8	0.019241	0.085999	0.470552	134	7	-0.4812	0.94375	0.94361	0.999955	655	0	-0.4812
H2-Bl	6	0.020274	0.080398	0.469025	135	3	-0.14984	0.68667	0.68438	0.999955	455	0	-0.14984
Pcgf6	11	0.020322	0.10223	0.529431	136	6	-0.035957	0.41028	0.41088	0.999955	274	0	-0.035957
Dnmt3a	11	0.020513	0.10309	0.529431	137	5	0.031294	0.36219	0.36295	0.999955	243	0	0.031294
Ccnt1	11	0.020784	0.10414	0.529431	138	7	-0.38008	0.71631	0.7161	0.999955	478	0	-0.38008
Sap18	8	0.021011	0.092432	0.497762	139	5	-1.368	0.90387	0.90404	0.999955	619	0	-1.368
Orc1	11	0.021079	0.10541	0.531811	140	7	-1.7965	0.60062	0.60008	0.999955	404	0	-1.7965
Jarid2	11	0.021531	0.10748	0.531811	141	6	-0.41516	0.4727	0.47295	0.999955	320	0	-0.41516
Chd5	11	0.021531	0.10748	0.531811	142	5	0.30122	0.39343	0.39352	0.999955	262	0	0.30122
Mysm1	11	0.021552	0.10753	0.531811	143	8	-0.97311	0.97029	0.97002	0.999955	683	0	-0.97311
Phf6	9	0.021826	0.10026	0.524378	144	6	-1.4888	0.77093	0.77119	0.999955	526	0	-1.4888
Ctcfl	10	0.022279	0.10344	0.529431	145	4	1.002	0.30839	0.30641	0.999955	203	0	1.002
Kmt2b	6	0.022469	0.086732	0.470552	146	5	-1.2539	0.76291	0.76181	0.999955	518	0	-1.2539
G2e3	11	0.022602	0.11166	0.540974	147	7	-0.52446	0.35937	0.35998	0.999955	240	0	-0.52446
Kdm4c	11	0.022662	0.11197	0.540974	148	8	-1.0836	0.95883	0.95864	0.999955	672	0	-1.0836
Rps19	8	0.022811	0.099181	0.522495	149	7	-1.0773	0.99375	0.99377	0.999955	711	0	-1.0773
Smyd2	10	0.023875	0.10868	0.533857	150	6	-0.81414	0.97988	0.97937	0.999955	691	0	-0.81414
Tdrd5	10	0.024796	0.11236	0.540974	151	3	0.78285	0.40426	0.40254	0.999955	268	0	0.78285
Caprin2	10	0.02591	0.11629	0.55257	152	8	-0.83396	0.91702	0.91627	0.999955	629	0	-0.83396
Polr2d	9	0.026523	0.11593	0.55257	153	4	-0.053483	0.95007	0.94996	0.999955	660	0	-0.053483
Arid2	10	0.026679	0.11912	0.555594	154	6	-1.2099	0.60597	0.60429	0.999955	406	0	-1.2099
Hif1an	11	0.026828	0.12822	0.582621	155	9	-0.46687	0.652	0.65097	0.999955	437	0	-0.46687
Mgea5	9	0.027094	0.11792	0.555594	156	5	-0.2961	0.99038	0.99046	0.999955	707	0	-0.2961
Taf3	11	0.028751	0.13597	0.590565	157	8	-1.056	0.98973	0.99004	0.999955	704	0	-1.056
Smarcc1	11	0.029399	0.13837	0.590565	158	4	0.80558	0.09662	0.096133	0.999955	64	0	0.80558
Ppargc1a	9	0.029595	0.12611	0.580252	159	5	-0.97187	0.37182	0.37203	0.999955	251	0	-0.97187
Snapc4	11	0.029667	0.13941	0.590565	160	7	-0.98684	0.021709	0.022201	0.999955	14	1	-0.98684
Tdo2	10	0.029813	0.1301	0.587448	161	4	0.52779	0.8759	0.87559	0.999955	597	0	0.52779
Jmjd6	11	0.029942	0.14035	0.590565	162	7	-1.2008	0.92881	0.92783	0.999955	643	0	-1.2008
Setd4	11	0.029997	0.14058	0.590565	163	6	-0.043304	0.11831	0.11881	0.999955	79	0	-0.043304
Scml2	8	0.030054	0.12571	0.580252	164	7	-0.45782	0.9278	0.92798	0.999955	642	0	-0.45782
Meaf6	9	0.030225	0.12806	0.582621	165	6	-0.59212	0.64559	0.6468	0.999955	429	0	-0.59212
Wrb	10	0.030241	0.1315	0.590128	166	8	-0.53349	0.7962	0.79521	0.999955	544	0	-0.53349
Map3k12	11	0.030275	0.14169	0.590565	167	9	-0.41141	0.95242	0.95224	0.999955	662	0	-0.41141
Dpep2	11	0.030409	0.14216	0.590565	168	8	-1.4428	0.7519	0.75158	0.999955	512	0	-1.4428
Sin3a	11	0.031174	0.14502	0.590873	169	6	-1.1187	0.88371	0.88404	0.999955	605	0	-1.1187
Chmp4c	11	0.031253	0.14529	0.590873	170	6	-0.076224	0.60001	0.59947	0.999955	403	0	-0.076224
Ruvbl2	11	0.031323	0.14548	0.590873	171	8	-0.73305	0.64983	0.64882	0.999955	434	0	-0.73305
Eif3a	10	0.032038	0.13785	0.590565	172	8	-0.88929	0.85946	0.85849	0.999955	587	0	-0.88929
Chd1l	10	0.032284	0.1386	0.590565	173	4	0.27847	0.54033	0.5388	0.999955	363	0	0.27847
Gzmn	9	0.032371	0.13505	0.590565	174	4	0.27412	0.26675	0.26761	0.999955	184	0	0.27412
Asxl1	11	0.03261	0.15029	0.591736	175	8	-0.68076	0.15178	0.1526	0.999955	98	0	-0.68076
Egfr	11	0.032622	0.1503	0.591736	176	6	-0.20793	0.77074	0.77032	0.999955	525	0	-0.20793
Jmjd1c	11	0.032635	0.15037	0.591736	177	7	-0.82691	0.78091	0.78054	0.999955	534	0	-0.82691
Plk1	10	0.033254	0.14199	0.590565	178	8	-0.74821	0.92538	0.92491	0.999955	636	0	-0.74821
Rcc1	8	0.033325	0.13667	0.590565	179	7	-0.88314	0.86367	0.86295	0.999955	590	0	-0.88314
Chmp4b	11	0.033845	0.15418	0.60222	180	7	-0.81895	0.53544	0.53635	0.999955	359	0	-0.81895
Asxl2	6	0.033989	0.11922	0.555594	181	5	-0.50652	0.92358	0.92423	0.999955	635	0	-0.50652
Setmar	11	0.034117	0.1549	0.60222	182	5	0.26979	0.18644	0.18715	0.999955	126	0	0.26979
Phf23	10	0.034141	0.14504	0.590873	183	7	-1.4504	0.71383	0.71252	0.999955	476	0	-1.4504
Lbr	10	0.035564	0.14958	0.591736	184	8	-0.62552	0.37203	0.3702	0.999955	252	0	-0.62552
H2-Ab1	10	0.035894	0.15058	0.591736	185	6	-0.76914	0.9736	0.97281	0.999955	687	0	-0.76914
Setd2	11	0.036576	0.16273	0.625956	186	8	-1.3049	0.69491	0.69456	0.999955	460	0	-1.3049
Csf3	9	0.039229	0.15666	0.60579	187	6	-0.63932	0.6488	0.64978	0.999955	433	0	-0.63932
Lag3	10	0.039779	0.16377	0.626638	188	7	-0.21007	0.1732	0.17158	0.999955	115	0	-0.21007
Chmp1b	6	0.040259	0.13669	0.590565	189	5	-1.3079	0.90458	0.90511	0.999955	622	0	-1.3079
Prdm14	11	0.040948	0.17544	0.654188	190	4	0.19929	0.91027	0.9098	0.999955	626	0	0.19929
Mllt10	10	0.040992	0.16823	0.640344	191	7	-1.0555	0.98224	0.98191	0.999955	693	0	-1.0555
Hyal1	11	0.041258	0.17625	0.654188	192	6	-0.041839	0.75388	0.75365	0.999955	514	0	-0.041839
Tdrd3	10	0.04148	0.16992	0.643379	193	4	0.088604	0.93409	0.93345	0.999955	650	0	0.088604
Taf12	10	0.044364	0.17907	0.654188	194	6	-1.2216	0.248	0.24638	0.999955	167	0	-1.2216
Kdm7a	6	0.045373	0.15044	0.591736	195	3	-0.31295	0.59864	0.59639	0.999955	402	0	-0.31295
Prdm16	11	0.045873	0.18989	0.684646	196	8	-0.57834	0.17819	0.17866	0.999955	120	0	-0.57834
Nat6	10	0.04634	0.1854	0.673939	197	5	-0.2987	0.89319	0.89292	0.999955	612	0	-0.2987
Braf	9	0.046465	0.1777	0.654188	198	5	-0.079922	0.54215	0.54332	0.999955	364	0	-0.079922
Prkab1	9	0.046465	0.1777	0.654188	199	2	0.6232	0.34292	0.34367	0.999955	226	0	0.6232
Klrk1	9	0.046612	0.1781	0.654188	200	5	-0.25004	0.82412	0.824	0.999955	565	0	-0.25004
Ube2v1	9	0.046709	0.17841	0.654188	201	7	-1.5281	0.65153	0.65256	0.999955	436	0	-1.5281
Icosl	11	0.046816	0.19285	0.687844	202	8	-0.73569	0.64599	0.64504	0.999955	430	0	-0.73569
Cbx1	10	0.048753	0.19301	0.687844	203	7	-0.17369	0.9226	0.92188	0.999955	633	0	-0.17369
Rere	11	0.048797	0.19862	0.691818	204	5	0.87015	0.067836	0.068326	0.999955	46	0	0.87015
Mier2	11	0.049276	0.2	0.691818	205	3	1.4922	0.10689	0.10696	0.999955	69	0	1.4922
Mta1	10	0.049652	0.19581	0.691049	206	7	-0.16841	0.70323	0.70182	0.999955	469	0	-0.16841
Gmeb2	11	0.049888	0.20174	0.691818	207	6	-1.1308	0.32555	0.32624	0.999955	215	0	-1.1308
Phf12	10	0.051457	0.20173	0.691818	208	6	-0.77914	0.92962	0.92899	0.999955	644	0	-0.77914
Kdm1b	11	0.052423	0.20886	0.697759	209	5	0.22339	0.38348	0.38366	0.999955	256	0	0.22339
Phc1	9	0.05255	0.19503	0.691049	210	3	0.24367	0.65648	0.65774	0.999955	441	0	0.24367
Ing2	11	0.052595	0.20923	0.697759	211	6	-0.65289	0.72736	0.72711	0.999955	489	0	-0.65289
Kalrn	10	0.053331	0.2079	0.697759	212	5	-0.013982	0.88092	0.88055	0.999955	601	0	-0.013982
Taf8	9	0.054519	0.20011	0.691818	213	6	-1.0912	0.093656	0.093293	0.999955	62	0	-1.0912
Brd7	9	0.054754	0.20081	0.691818	214	5	-0.87717	0.59629	0.59672	0.999955	400	0	-0.87717
Chd7	11	0.055101	0.2163	0.705405	215	6	-0.11984	0.97834	0.97861	0.999955	689	0	-0.11984
Kdm4d	11	0.055101	0.2163	0.705405	216	6	-0.33842	0.17701	0.17741	0.999955	119	0	-0.33842
Ino80	11	0.055496	0.21724	0.705405	217	7	-0.83489	0.83654	0.83622	0.999955	573	0	-0.83489
H2-Aa	10	0.055776	0.21508	0.705405	218	7	-0.99765	0.90873	0.90804	0.999955	625	0	-0.99765
Thbs1	9	0.056436	0.20561	0.697759	219	6	-0.99632	0.52031	0.52152	0.999955	345	0	-0.99632
Rel	9	0.056733	0.20659	0.697759	220	7	-0.56503	0.81606	0.81619	0.999955	554	0	-0.56503
Taf1	11	0.057299	0.22244	0.713831	221	8	-1.0801	0.97374	0.97367	0.999955	688	0	-1.0801
Smad1	11	0.057463	0.22289	0.713831	222	4	0.27022	0.20386	0.20377	0.999955	137	0	0.27022
Rps7	8	0.059069	0.20575	0.697759	223	6	-0.79339	0.49838	0.49781	0.999955	333	0	-0.79339
Stat5b	10	0.059433	0.22429	0.71518	224	7	-0.77747	0.47374	0.47126	0.999955	321	0	-0.77747
Dnmt3b	11	0.059843	0.22946	0.725289	225	3	0.60158	0.7495	0.74917	0.999955	511	0	0.60158
Kdm2a	11	0.06098	0.23274	0.729332	226	6	-0.71549	0.049088	0.050434	0.999955	34	0	-0.71549
Arnt2	6	0.061261	0.19023	0.684646	227	4	-0.51519	0.31066	0.3096	0.999955	205	0	-0.51519
Mecom	9	0.062036	0.22173	0.713831	228	7	-0.53545	0.80794	0.80853	0.999955	550	0	-0.53545
Ehmt2	11	0.063062	0.23833	0.740438	229	5	0.62683	0.90408	0.90386	0.999955	620	0	0.62683
Clock	9	0.064195	0.22761	0.722582	230	3	0.8309	0.038112	0.037243	0.999955	24	0	0.8309
Kat5	10	0.064567	0.23587	0.735959	231	4	-0.0019989	0.34442	0.3427	0.999955	228	0	-0.0019989
Pbrm1	9	0.065698	0.23178	0.729332	232	7	-0.75502	0.73204	0.7331	0.999955	490	0	-0.75502
Ctcf	10	0.066888	0.24131	0.745151	233	6	-0.81533	0.674	0.673	0.999955	451	0	-0.81533
Hells	11	0.067099	0.24921	0.751769	234	7	-0.51393	0.98986	0.9902	0.999955	705	0	-0.51393
Nfs1	10	0.067169	0.24192	0.745151	235	7	-0.83183	0.017226	0.017194	0.999955	11	1	-0.83183
Sirt3	11	0.067836	0.25121	0.752108	236	5	0.79197	0.43936	0.44028	0.999955	290	0	0.79197
Uty	11	0.068659	0.25378	0.753061	237	5	0.48183	0.41464	0.41516	0.999955	276	0	0.48183
Nap1l4	10	0.070105	0.2489	0.751769	238	6	-1.2796	0.7028	0.70151	0.999955	468	0	-1.2796
Kmt2d	6	0.070274	0.21313	0.705405	239	5	-0.48582	0.73641	0.73536	0.999955	499	0	-0.48582
Wnk1	9	0.07057	0.24529	0.749275	240	6	-0.82719	0.3907	0.39143	0.999955	260	0	-0.82719
Alkbh2	9	0.071434	0.24788	0.751769	241	6	-1.149	0.41915	0.41989	0.999955	279	0	-1.149
Il13	10	0.07151	0.25238	0.752108	242	7	-0.55547	0.70193	0.70071	0.999955	467	0	-0.55547
Smyd4	10	0.071533	0.25243	0.752108	243	3	2.2682	0.00064282	0.0010935	0.198741	4	1	2.2682
Phf19	11	0.07181	0.26199	0.759652	244	4	0.27975	0.32258	0.32346	0.999955	213	0	0.27975
Gm10094	6	0.072031	0.21735	0.705405	245	5	-1.3582	0.83455	0.83327	0.999955	571	0	-1.3582
Rnf20	11	0.072848	0.26455	0.760926	246	6	-0.73199	0.4883	0.4883	0.999955	327	0	-0.73199
Hdgfl1	10	0.073629	0.25731	0.757682	247	7	-1.1687	0.87029	0.86951	0.999955	595	0	-1.1687
Tdrd7	10	0.073682	0.25742	0.757682	248	7	-0.59063	0.861	0.85988	0.999955	588	0	-0.59063
Cd70	11	0.07445	0.26853	0.763808	249	3	0.98423	0.73465	0.73461	0.999955	495	0	0.98423
Baz1a	11	0.075068	0.27001	0.763808	250	7	-0.84233	0.7145	0.71433	0.999955	477	0	-0.84233
Phf21a	11	0.075068	0.27001	0.763808	251	5	0.73409	0.26593	0.26659	0.999955	183	0	0.73409
Supt7l	9	0.075467	0.25852	0.757847	252	3	0.77025	0.56586	0.5666	0.999955	377	0	0.77025
Gsg2	9	0.07659	0.26156	0.759652	253	5	-0.79615	0.53634	0.53744	0.999955	360	0	-0.79615
Cd4	10	0.077908	0.26673	0.763425	254	5	-0.30671	0.88429	0.88414	0.999955	607	0	-0.30671
Zfp541	11	0.079049	0.2802	0.777441	255	7	-0.12587	0.267	0.26773	0.999955	185	0	-0.12587
Phf13	11	0.079452	0.28132	0.777441	256	8	-0.52234	0.60429	0.60383	0.999955	405	0	-0.52234
Tet1	11	0.080355	0.28378	0.777441	257	8	-0.77366	0.7338	0.73371	0.999955	492	0	-0.77366
Prmt10	10	0.081707	0.27501	0.771937	258	5	0.066748	0.30746	0.30556	0.999955	202	0	0.066748
Brpf1	11	0.082331	0.28896	0.777441	259	7	-1.2198	0.74217	0.74176	0.999955	505	0	-1.2198
Ncor2	10	0.083132	0.27842	0.777441	260	6	-0.86023	0.62713	0.62567	0.999955	423	0	-0.86023
Kat6b	6	0.083191	0.24292	0.745151	261	5	-0.61024	0.22255	0.22207	0.999955	147	0	-0.61024
Smarce1	9	0.084339	0.28124	0.777441	262	5	-0.49933	0.26146	0.26243	0.999955	179	0	-0.49933
Hdac4	11	0.084944	0.29532	0.780706	263	4	0.072694	0.49972	0.49987	0.999955	335	0	0.072694
Prdm11	9	0.085309	0.28353	0.777441	264	7	-0.31354	0.70701	0.70885	0.999955	471	0	-0.31354
Prdm5	9	0.086203	0.28574	0.777441	265	5	-1.1289	0.37105	0.3713	0.999955	249	0	-1.1289
Nfkb2	11	0.087551	0.30196	0.789646	266	5	0.20219	0.0021199	0.0027263	0.355516	5	1	0.20219
Tdrd12	9	0.087648	0.28934	0.777441	267	7	-1.0671	0.99352	0.9936	0.999955	709	0	-1.0671
Il12a	7	0.087721	0.26227	0.759652	268	3	1.6941	0.042851	0.041884	0.999955	29	0	1.6941
Mr1	10	0.088237	0.29025	0.777441	269	3	1.1548	0.60653	0.6049	0.999955	407	0	1.1548
Padi4	10	0.08853	0.29087	0.777441	270	3	0.8796	0.49846	0.49635	0.999955	334	0	0.8796
Nat10	11	0.089032	0.3058	0.796846	271	7	-0.78038	0.59506	0.5945	0.999955	399	0	-0.78038
Cml1	9	0.089827	0.29489	0.780706	272	4	0.31216	0.70972	0.7115	0.999955	472	0	0.31216
Rela	11	0.091783	0.31236	0.801022	273	8	-0.59279	0.22543	0.22558	0.999955	150	0	-0.59279
Psmd1	10	0.091913	0.2985	0.786271	274	6	-0.67378	0.11969	0.11937	0.999955	81	0	-0.67378
Alg13	11	0.092525	0.31402	0.801022	275	7	-1.4064	0.35368	0.3544	0.999955	235	0	-1.4064
Brd2	6	0.092874	0.26481	0.760926	276	4	-1.2167	0.88399	0.88363	0.999955	606	0	-1.2167
Kdm5d	11	0.093189	0.31567	0.802422	277	8	-0.4734	0.73549	0.73535	0.999955	497	0	-0.4734
Tnfsf9	11	0.094037	0.31781	0.804924	278	3	1.9331	0.062514	0.063289	0.999955	41	0	1.9331
Dot1l	11	0.09533	0.32108	0.804924	279	3	1.6261	0.50572	0.50575	0.999955	338	0	1.6261
Kdm8	6	0.095842	0.27155	0.765169	280	5	-0.64845	0.94196	0.94286	0.999955	652	0	-0.64845
Phf20l1	10	0.09734	0.31112	0.801022	281	7	-0.9808	0.65965	0.65759	0.999955	444	0	-0.9808
Brca1	11	0.097358	0.32556	0.807781	282	5	0.070855	0.92581	0.92487	0.999955	639	0	0.070855
Sin3b	9	0.097889	0.31104	0.801022	283	4	0.36654	0.16426	0.16561	0.999955	107	0	0.36654
Kdm6a	11	0.097909	0.32688	0.808313	284	4	0.46892	0.48983	0.48978	0.999955	328	0	0.46892
Bmi1	9	0.097976	0.31124	0.801022	285	5	-0.73615	0.69635	0.6981	0.999955	463	0	-0.73615
Paxip1	9	0.098945	0.31298	0.801022	286	2	0.27797	0.82288	0.82297	0.999955	561	0	0.27797
Men1	10	0.10137	0.32038	0.804924	287	5	-0.20586	0.62288	0.62138	0.999955	419	0	-0.20586
Gatad2a	11	0.10279	0.33889	0.826064	288	8	-0.21617	0.46394	0.46483	0.999955	311	0	-0.21617
Phf8	10	0.10279	0.32342	0.807781	289	7	-0.59353	0.95829	0.95723	0.999955	670	0	-0.59353
Kdm3a	11	0.10288	0.33907	0.826064	290	6	-0.66484	0.66792	0.66709	0.999955	447	0	-0.66484
Tgfb2	9	0.10299	0.32078	0.804924	291	6	-0.95559	0.62529	0.62632	0.999955	421	0	-0.95559
Arid1a	11	0.1031	0.3396	0.826064	292	8	-0.40168	0.26486	0.26552	0.999955	182	0	-0.40168
Phf11c	6	0.10316	0.2876	0.777441	293	3	-0.65119	0.63538	0.63336	0.999955	426	0	-0.65119
L3mbtl2	11	0.10401	0.34162	0.826064	294	7	-1.0009	0.59068	0.59023	0.999955	395	0	-1.0009
Smarca2	6	0.10433	0.29009	0.777441	295	2	0.70467	0.44815	0.44679	0.999955	302	0	0.70467
Dimt1	10	0.10602	0.33076	0.815132	296	6	-0.5233	0.55853	0.55708	0.999955	373	0	-0.5233
Adora3	6	0.10644	0.29419	0.780706	297	3	0.26452	0.50694	0.50454	0.999955	340	0	0.26452
Smc1b	11	0.10816	0.35156	0.837988	298	6	-0.2571	0.54659	0.54732	0.999955	368	0	-0.2571
Suv420h1	6	0.10895	0.29985	0.786965	299	5	-0.75091	0.95756	0.9581	0.999955	668	0	-0.75091
Ncoa3	10	0.11175	0.34285	0.826064	300	6	-0.62296	0.7421	0.7412	0.999955	504	0	-0.62296
Smarcad1	10	0.11192	0.34315	0.826064	301	6	-0.3574	0.47229	0.46965	0.999955	319	0	-0.3574
Nap1l2	10	0.11252	0.34432	0.826139	302	6	-0.16299	0.19885	0.19764	0.999955	132	0	-0.16299
Ruvbl1	11	0.11293	0.36277	0.847784	303	6	-0.2721	0.2004	0.2004	0.999955	135	0	-0.2721
Brdt	11	0.11349	0.36402	0.847784	304	6	-0.66517	0.43517	0.43592	0.999955	287	0	-0.66517
Kdm6b	11	0.11564	0.36819	0.847784	305	7	-0.67319	0.96714	0.96683	0.999955	679	0	-0.67319
Senp3	11	0.11933	0.37467	0.847784	306	5	0.084445	0.32753	0.32814	0.999955	216	0	0.084445
H2-Ob	10	0.12032	0.36056	0.847784	307	6	-0.62055	0.34178	0.33996	0.999955	225	0	-0.62055
Prdm9	11	0.12083	0.3773	0.847784	308	5	0.51409	0.88667	0.88695	0.999955	608	0	0.51409
Chd6	11	0.12102	0.37763	0.847784	309	6	-0.49227	0.79872	0.79871	0.999955	545	0	-0.49227
Zmynd11	10	0.12121	0.36242	0.847784	310	4	0.44944	0.41227	0.40993	0.999955	275	0	0.44944
Eif3b	11	0.1215	0.37854	0.847784	311	7	-0.38201	0.092743	0.092432	0.999955	61	0	-0.38201
Stat2	11	0.1224	0.38008	0.847784	312	7	-0.22334	0.77624	0.77617	0.999955	532	0	-0.22334
Jmjd7	10	0.12332	0.36641	0.847784	313	4	1.2153	0.51346	0.51164	0.999955	343	0	1.2153
Prdm8	11	0.12357	0.38224	0.849812	314	5	0.040557	0.89553	0.89555	0.999955	613	0	0.040557
Supt4a	6	0.12525	0.32483	0.807781	315	4	-0.87806	0.33464	0.33305	0.999955	220	0	-0.87806
Grhl1	10	0.12529	0.37018	0.847784	316	6	-0.56186	0.13222	0.131	0.999955	89	0	-0.56186
Satb2	10	0.12541	0.37056	0.847784	317	3	0.28124	0.65276	0.65052	0.999955	438	0	0.28124
Alkbh3	10	0.12582	0.37152	0.847784	318	7	-0.45354	0.51143	0.50975	0.999955	341	0	-0.45354
Hdac10	11	0.12585	0.38633	0.854224	319	4	1.1028	0.40324	0.40389	0.999955	267	0	1.1028
Prkab2	10	0.12601	0.37192	0.847784	320	5	-0.12921	0.2041	0.2031	0.999955	138	0	-0.12921
Rps6ka5	10	0.1272	0.37436	0.847784	321	4	0.55136	0.62073	0.61937	0.999955	418	0	0.55136
H2-Q1	9	0.1288	0.36887	0.847784	322	6	-0.50152	0.87865	0.87868	0.999955	600	0	-0.50152
Smarcd2	10	0.12981	0.37938	0.847784	323	6	-0.90267	0.34706	0.34528	0.999955	229	0	-0.90267
Areg	9	0.13011	0.37128	0.847784	324	5	-0.27852	0.82213	0.8222	0.999955	560	0	-0.27852
Nfkb1	11	0.13149	0.39627	0.864785	325	7	-0.34498	0.82091	0.82096	0.999955	559	0	-0.34498
Sp100	9	0.13499	0.37975	0.847784	326	6	-0.41364	0.29946	0.30064	0.999955	197	0	-0.41364
Mier3	9	0.13521	0.38016	0.847784	327	3	0.37098	0.85013	0.84985	0.999955	582	0	0.37098
Ptprc	6	0.13544	0.33989	0.826064	328	3	0.090703	0.81636	0.8149	0.999955	555	0	0.090703
Mfge8	11	0.13581	0.40412	0.866652	329	4	0.39072	0.96198	0.96161	0.999955	677	0	0.39072
Btla	10	0.13897	0.39728	0.864785	330	5	-0.052123	0.078725	0.07838	0.999955	52	0	-0.052123
H2-Q2	10	0.13899	0.3973	0.864785	331	7	-0.49932	0.69845	0.69716	0.999955	465	0	-0.49932
Zmynd8	11	0.13945	0.41059	0.873438	332	5	0.13751	0.79237	0.79182	0.999955	539	0	0.13751
Sfmbt1	11	0.13965	0.41089	0.873438	333	5	0.23706	0.61571	0.61548	0.999955	414	0	0.23706
Jmjd8	9	0.13976	0.38804	0.854862	334	4	0.74193	0.24449	0.24525	0.999955	163	0	0.74193
Rbbp5	10	0.14074	0.40065	0.866652	335	7	-0.87881	0.68689	0.68593	0.999955	456	0	-0.87881
Ing3	8	0.14224	0.38657	0.854224	336	5	-0.46497	0.967	0.96709	0.999955	678	0	-0.46497
Prdm4	10	0.14236	0.4039	0.866652	337	5	-0.14291	0.7344	0.73375	0.999955	494	0	-0.14291
Asz1	9	0.14239	0.39259	0.862277	338	6	-0.66075	0.4423	0.44281	0.999955	294	0	-0.66075
Ezh1	11	0.14321	0.41751	0.879794	339	6	-0.14866	0.4906	0.49059	0.999955	329	0	-0.14866
Phf11d	6	0.14323	0.35124	0.837988	340	3	0.24028	0.024061	0.024309	0.999955	15	0	0.24028
Nkx2-1	11	0.14444	0.41959	0.881617	341	5	0.24986	0.15542	0.15622	0.999955	101	0	0.24986
Prdm10	11	0.14567	0.42161	0.883306	342	6	-0.13517	0.78055	0.78031	0.999955	533	0	-0.13517
Taf10	11	0.14989	0.42872	0.885796	343	7	-0.29467	0.5459	0.54658	0.999955	367	0	-0.29467
Cbx7	9	0.15092	0.40738	0.871064	344	5	-0.89782	0.76364	0.76415	0.999955	519	0	-0.89782
Ccdc79	11	0.15106	0.43085	0.885796	345	6	-0.59697	0.30144	0.30263	0.999955	199	0	-0.59697
Rae1	10	0.15374	0.42566	0.884162	346	7	-0.64053	0.93032	0.92981	0.999955	646	0	-0.64053
Ube2i	10	0.15374	0.42566	0.884162	347	7	-0.67907	0.84085	0.83977	0.999955	576	0	-0.67907
Ccl5	9	0.15439	0.413	0.875359	348	6	-0.87409	0.30868	0.30957	0.999955	204	0	-0.87409
Pwwp2b	9	0.15691	0.41711	0.879794	349	3	0.96783	0.16623	0.16762	0.999955	109	0	0.96783
Nhs	11	0.15722	0.44117	0.895894	350	7	-0.54711	0.44766	0.44861	0.999955	301	0	-0.54711
Tcf7l1	10	0.15861	0.43517	0.891028	351	5	0.13938	0.4943	0.49211	0.999955	331	0	0.13938
Baz2b	10	0.15941	0.43677	0.891028	352	7	-0.22277	0.99659	0.99637	0.999955	716	0	-0.22277
Pygo1	11	0.16149	0.44828	0.907003	353	6	-0.043226	0.57988	0.57958	0.999955	387	0	-0.043226
Glyr1	11	0.16208	0.44931	0.907003	354	6	-0.19661	0.014754	0.014898	0.999955	8	1	-0.19661
Satl1	11	0.16276	0.45038	0.907003	355	7	-0.30965	0.075768	0.076114	0.999955	51	0	-0.30965
Tnrc18	11	0.16455	0.45313	0.908744	356	7	-0.086934	0.069163	0.069563	0.999955	48	0	-0.086934
Gfi1b	9	0.16475	0.4302	0.885796	357	5	-0.43927	0.12189	0.12264	0.999955	83	0	-0.43927
Mbd5	11	0.16498	0.45375	0.908744	358	7	-0.33284	0.48366	0.48372	0.999955	324	0	-0.33284
Ube2b	9	0.16548	0.43132	0.885796	359	6	-0.57868	0.8181	0.81824	0.999955	556	0	-0.57868
Pcgf5	8	0.16692	0.42413	0.884162	360	5	-0.70249	0.22553	0.22455	0.999955	151	0	-0.70249
Uhrf2	11	0.16784	0.45853	0.913679	361	7	-0.31879	0.83185	0.83167	0.999955	569	0	-0.31879
Entpd1	10	0.17253	0.46062	0.914957	362	4	0.22594	0.3549	0.35301	0.999955	237	0	0.22594
Sirt2	11	0.17288	0.467	0.915745	363	5	-0.14714	0.58816	0.58775	0.999955	392	0	-0.14714
Bahcc1	11	0.17345	0.46784	0.915745	364	6	-0.44209	0.96832	0.96794	0.999955	680	0	-0.44209
Jun	10	0.17671	0.46678	0.915745	365	5	-0.38503	0.59242	0.59112	0.999955	396	0	-0.38503
Suv39h2	11	0.17701	0.4736	0.915745	366	6	-0.88357	0.4402	0.44097	0.999955	291	0	-0.88357
Snai1	11	0.17702	0.47362	0.915745	367	6	-0.25154	0.047736	0.049138	0.999955	31	0	-0.25154
Traf7	6	0.17772	0.40157	0.866652	368	3	0.49047	0.46394	0.4621	0.999955	312	0	0.49047
Smarca4	10	0.17833	0.46933	0.915745	369	6	-0.48824	0.055776	0.056253	0.999955	39	0	-0.48824
C920025E04Rik	6	0.17865	0.40293	0.866652	370	3	0.64342	0.44956	0.44802	0.999955	304	0	0.64342
Kdr	11	0.17878	0.47632	0.918526	371	4	0.50465	0.95692	0.95687	0.999955	666	0	0.50465
Pwwp2a	10	0.18051	0.47259	0.915745	372	4	0.74162	0.21451	0.21315	0.999955	144	0	0.74162
Ints12	10	0.18058	0.47263	0.915745	373	6	-0.85348	0.76989	0.76862	0.999955	523	0	-0.85348
Cd74	9	0.18186	0.45872	0.913679	374	4	0.021622	0.016658	0.016452	0.999955	10	1	0.021622
Ccnt2	11	0.18281	0.4823	0.926991	375	6	-0.79877	0.94307	0.94258	0.999955	653	0	-0.79877
Whsc1l1	9	0.18523	0.46418	0.915745	376	6	-0.17158	0.82387	0.82387	0.999955	564	0	-0.17158
Cramp1l	11	0.18678	0.48897	0.928706	377	5	0.20572	0.16867	0.16926	0.999955	112	0	0.20572
Trdmt1	11	0.18698	0.48926	0.928706	378	6	-0.62461	0.76999	0.76955	0.999955	524	0	-0.62461
Nat8	10	0.19012	0.48581	0.926991	379	5	-0.2575	0.31115	0.30936	0.999955	206	0	-0.2575
Aire	9	0.1908	0.4727	0.915745	380	6	-0.51662	0.45051	0.45114	0.999955	306	0	-0.51662
Akap1	11	0.19393	0.49975	0.933668	381	7	-0.3089	0.34411	0.34472	0.999955	227	0	-0.3089
Chd4	11	0.19403	0.49983	0.933668	382	5	0.11126	0.77222	0.77192	0.999955	528	0	0.11126
Rnf17	11	0.19548	0.50172	0.933668	383	6	-0.81418	0.37983	0.38023	0.999955	254	0	-0.81418
Pdcd1lg2	11	0.19751	0.50472	0.933668	384	3	1.2669	0.22431	0.2245	0.999955	148	0	1.2669
H2-DMb2	10	0.19887	0.49799	0.933668	385	4	0.16662	0.11854	0.11818	0.999955	80	0	0.16662
Cd40	9	0.19912	0.48504	0.926991	386	3	1.4365	0.50628	0.50777	0.999955	339	0	1.4365
Control	712	0.20086	0.51007	0.934355	387	323	0.24908	0.47605	0.47643	0.999955	323	2	0.24908
Gm11127	9	0.20315	0.49165	0.930802	388	5	-0.24412	0.41557	0.41642	0.999955	277	0	-0.24412
Kat6a	6	0.20359	0.43755	0.891028	389	2	0.13842	0.42907	0.42699	0.999955	284	0	0.13842
Setd6	11	0.20521	0.51616	0.938121	390	6	-0.56282	0.95391	0.95377	0.999955	664	0	-0.56282
Prmt3	10	0.20533	0.50691	0.934355	391	3	2.6905	0.54415	0.54256	0.999955	365	0	2.6905
L3mbtl3	10	0.20652	0.50861	0.934355	392	5	-0.49103	0.5719	0.57101	0.999955	382	0	-0.49103
Hdac7	11	0.20662	0.51819	0.939459	393	6	-0.24856	0.09015	0.090037	0.999955	58	0	-0.24856
Ncor1	9	0.20754	0.49845	0.933668	394	4	0.40067	0.90471	0.90509	0.999955	623	0	0.40067
Hdac9	11	0.20769	0.51986	0.940146	395	7	-0.26746	0.67358	0.67303	0.999955	450	0	-0.26746
Brpf3	9	0.20947	0.50142	0.933668	396	6	-0.59953	0.70428	0.70641	0.999955	470	0	-0.59953
Brd1	10	0.20984	0.51316	0.937358	397	4	0.34616	0.57962	0.57872	0.999955	386	0	0.34616
Smchd1	9	0.20998	0.5022	0.933668	398	4	0.82698	0.67611	0.67727	0.999955	452	0	0.82698
Cecr2	11	0.21357	0.52821	0.94151	399	4	0.20808	0.8152	0.81538	0.999955	553	0	0.20808
Ash1l	11	0.21432	0.52933	0.94151	400	4	0.51979	0.61689	0.61676	0.999955	415	0	0.51979
Rnase12	9	0.2154	0.51023	0.934355	401	5	-0.33872	0.65107	0.65221	0.999955	435	0	-0.33872
Prmt8	9	0.21848	0.51467	0.937749	402	6	-0.39808	0.65738	0.65858	0.999955	442	0	-0.39808
H2-Q4	10	0.21856	0.52422	0.94151	403	6	-0.41783	0.77532	0.77397	0.999955	531	0	-0.41783
Kdm5c	11	0.22052	0.5387	0.948273	404	6	-0.17599	0.82903	0.82893	0.999955	568	0	-0.17599
Smad7	10	0.22428	0.53153	0.94151	405	5	-0.48653	0.42412	0.42162	0.999955	280	0	-0.48653
Atad2	10	0.2248	0.53227	0.94151	406	2	0.58949	0.79279	0.79165	0.999955	540	0	0.58949
Setd3	9	0.22828	0.52831	0.94151	407	4	0.27831	0.27113	0.27171	0.999955	186	0	0.27831
Dpep3	9	0.22989	0.53067	0.94151	408	5	-0.56048	0.36567	0.36602	0.999955	244	0	-0.56048
Fbxo11	10	0.23144	0.54086	0.949771	409	4	0.053676	0.52674	0.52522	0.999955	352	0	0.053676
Mbd4	9	0.23177	0.53359	0.941547	410	5	-0.2755	0.88181	0.88201	0.999955	603	0	-0.2755
Pml	11	0.2338	0.55777	0.959984	411	4	1.3486	0.49518	0.49504	0.999955	332	0	1.3486
Mta2	10	0.23549	0.54609	0.956653	412	6	-0.62402	0.89146	0.89109	0.999955	610	0	-0.62402
Rbm14	11	0.23896	0.56495	0.961864	413	4	0.073798	0.836	0.83565	0.999955	572	0	0.073798
Jade3	6	0.23898	0.4849	0.926991	414	3	-0.21415	0.29062	0.28965	0.999955	195	0	-0.21415
Sat1	10	0.2398	0.55173	0.959984	415	5	-0.064541	0.64827	0.64598	0.999955	432	0	-0.064541
Kir3dl1	10	0.24007	0.55207	0.959984	416	6	-0.72807	0.24999	0.24819	0.999955	171	0	-0.72807
Fto	10	0.24273	0.55556	0.959984	417	6	-0.22957	0.31938	0.31749	0.999955	211	0	-0.22957
Cd40lg	9	0.24314	0.54942	0.959984	418	2	0.4577	0.66577	0.66669	0.999955	445	0	0.4577
Mtf2	10	0.24426	0.55757	0.959984	419	5	-0.37778	0.56221	0.56089	0.999955	375	0	-0.37778
Cbx4	10	0.24468	0.55816	0.959984	420	6	-0.20671	0.59012	0.5887	0.999955	394	0	-0.20671
Ubr7	10	0.24568	0.55952	0.959984	421	6	-0.342	0.25887	0.25689	0.999955	177	0	-0.342
H2-Oa	10	0.24795	0.5622	0.959984	422	2	1.2228	0.38211	0.38026	0.999955	255	0	1.2228
Chd3	11	0.2503	0.58099	0.978675	423	4	0.44678	0.83709	0.83685	0.999955	574	0	0.44678
Mecp2	11	0.25515	0.58713	0.981254	424	7	-0.34635	0.5773	0.57721	0.999955	385	0	-0.34635
Fos	10	0.25985	0.57669	0.977285	425	3	1.9515	0.15238	0.15103	0.999955	99	0	1.9515
Smarcal1	10	0.25985	0.57669	0.977285	426	2	0.55121	0.48517	0.48288	0.999955	325	0	0.55121
H2-T23	10	0.26297	0.58061	0.978675	427	5	-0.036621	0.45542	0.45339	0.999955	308	0	-0.036621
Ing5	11	0.26486	0.59971	0.993142	428	5	-0.064493	0.7011	0.70083	0.999955	466	0	-0.064493
Slc26a1	11	0.26753	0.60308	0.99646	429	4	0.78189	0.3166	0.31753	0.999955	210	0	0.78189
Mgmt	11	0.26974	0.60599	0.997957	430	6	-0.23005	0.13209	0.13186	0.999955	88	0	-0.23005
Prdm12	8	0.27074	0.56207	0.959984	431	4	-0.45818	0.19797	0.19684	0.999955	131	0	-0.45818
Msl3	8	0.27119	0.56252	0.959984	432	4	0.19232	0.085603	0.085693	0.999955	55	0	0.19232
L3mbtl4	6	0.27198	0.52785	0.94151	433	3	0.3197	0.20741	0.20726	0.999955	139	0	0.3197
Supt3	6	0.2752	0.53181	0.94151	434	3	0.78336	0.2448	0.24469	0.999955	164	0	0.78336
Tada3	11	0.27521	0.61288	0.999995	435	4	0.49776	0.76014	0.75961	0.999955	515	0	0.49776
Phf11b	5	0.27531	0.50357	0.933668	436	3	-0.5586	0.095474	0.095203	0.999955	63	0	-0.5586
Tdrd6	11	0.2804	0.61861	0.999995	437	5	0.079371	0.13457	0.13452	0.999955	90	0	0.079371
Stat6	11	0.28179	0.61993	0.999995	438	4	0.51031	0.6973	0.6971	0.999955	464	0	0.51031
Nat9	9	0.28463	0.59683	0.990629	439	4	0.36239	0.94743	0.94746	0.999955	656	0	0.36239
Nsd1	10	0.28505	0.60674	0.997957	440	5	-0.33578	0.14571	0.14452	0.999955	96	0	-0.33578
Smad2	8	0.28742	0.58155	0.978675	441	3	0.37255	0.31376	0.31339	0.999955	207	0	0.37255
Smarcb1	10	0.29536	0.61918	0.999995	442	5	0.10924	0.20095	0.19983	0.999955	136	0	0.10924
Epas1	11	0.29939	0.6372	0.999995	443	5	1.8792	0.24757	0.2481	0.999955	166	0	1.8792
Tinagl1	9	0.30078	0.61322	0.999995	444	5	-0.62744	0.46062	0.46092	0.999955	310	0	-0.62744
Dnmt3l	9	0.30269	0.61511	0.999995	445	4	0.30996	0.1613	0.16252	0.999955	104	0	0.30996
Cxcl10	10	0.30435	0.62963	0.999995	446	5	-0.19589	0.8623	0.86135	0.999955	589	0	-0.19589
Prmt2	10	0.30462	0.62989	0.999995	447	5	-0.12156	0.19674	0.19568	0.999955	130	0	-0.12156
Setdb2	11	0.30834	0.64593	0.999995	448	6	-0.16252	0.58052	0.5802	0.999955	388	0	-0.16252
Hemk1	10	0.30864	0.63408	0.999995	449	5	-0.15481	0.87708	0.8767	0.999955	598	0	-0.15481
Rnf2	11	0.31776	0.65496	0.999995	450	6	-0.4907	0.96154	0.96126	0.999955	675	0	-0.4907
Npcd	6	0.3182	0.58368	0.979987	451	4	-0.30803	0.17903	0.17947	0.999955	121	0	-0.30803
Hmgn5	9	0.31824	0.63046	0.999995	452	3	0.29689	0.58531	0.58603	0.999955	390	0	0.29689
Tyw5	6	0.31939	0.58506	0.98005	453	3	0.097108	0.18555	0.18581	0.999955	125	0	0.097108
Smyd5	10	0.32074	0.64748	0.999995	454	5	0.10295	0.1999	0.1988	0.999955	133	0	0.10295
Smarcd1	10	0.32551	0.65312	0.999995	455	6	-0.44069	0.52146	0.51964	0.999955	347	0	-0.44069
Hspbap1	10	0.32659	0.6544	0.999995	456	4	0.18636	0.25789	0.25596	0.999955	176	0	0.18636
Rcor3	6	0.32691	0.59384	0.99019	457	4	-0.3763	0.90014	0.90036	0.999955	617	0	-0.3763
Supt6	6	0.32943	0.59662	0.990629	458	3	-0.22475	0.85152	0.85095	0.999955	584	0	-0.22475
Dscam	11	0.33048	0.66654	0.999995	459	6	-0.13965	0.97342	0.97334	0.999955	686	0	-0.13965
Bcor	10	0.3329	0.66132	0.999995	460	5	-0.010859	0.56889	0.56785	0.999955	379	0	-0.010859
Alg10b	9	0.33368	0.64483	0.999995	461	4	0.45127	0.57134	0.572	0.999955	381	0	0.45127
Tdrkh	10	0.3358	0.66475	0.999995	462	6	-0.39141	0.23091	0.22952	0.999955	154	0	-0.39141
Arid1b	10	0.33593	0.66488	0.999995	463	5	-0.1165	0.46866	0.466	0.999955	316	0	-0.1165
Epc1	9	0.3365	0.64745	0.999995	464	5	-0.22517	0.86545	0.86501	0.999955	591	0	-0.22517
Tgfb3	10	0.33757	0.66658	0.999995	465	5	0.10595	0.44339	0.44069	0.999955	295	0	0.10595
Supt5	6	0.34094	0.61076	0.999995	466	3	0.24041	0.019515	0.019905	0.999955	12	1	0.24041
Atad2b	10	0.34222	0.67166	0.999995	467	3	1.4355	0.15016	0.14889	0.999955	97	0	1.4355
Scmh1	10	0.34222	0.67166	0.999995	468	4	0.069548	0.77397	0.77281	0.999955	529	0	0.069548
Prdm6	11	0.34709	0.68193	0.999995	469	4	0.55438	0.031372	0.032325	0.999955	19	1	0.55438
Cbx8	10	0.34739	0.6774	0.999995	470	5	0.076791	0.25493	0.25295	0.999955	173	0	0.076791
Prdm13	11	0.34795	0.68261	0.999995	471	3	0.89041	0.55207	0.55275	0.999955	371	0	0.89041
Ciita	11	0.35264	0.68682	0.999995	472	6	-0.18635	0.24866	0.24915	0.999955	168	0	-0.18635
Whsc1	10	0.35441	0.685	0.999995	473	5	-0.091168	0.59299	0.59164	0.999955	397	0	-0.091168
Ereg	9	0.35634	0.66651	0.999995	474	3	0.90168	0.79388	0.79406	0.999955	541	0	0.90168
Phf21b	10	0.36137	0.69217	0.999995	475	4	0.49793	0.77194	0.77077	0.999955	527	0	0.49793
Psmb9	11	0.3651	0.69841	0.999995	476	5	0.56201	0.35178	0.35243	0.999955	234	0	0.56201
Nap1l1	7	0.36553	0.64395	0.999995	477	4	-0.087803	0.46858	0.47056	0.999955	315	0	-0.087803
Arg2	10	0.36671	0.69749	0.999995	478	6	-0.11697	0.76259	0.76083	0.999955	517	0	-0.11697
Vdac1	9	0.36925	0.67842	0.999995	479	3	0.13977	0.33732	0.33806	0.999955	221	0	0.13977
Slc25a15	11	0.37362	0.70649	0.999995	480	6	-0.042701	0.19461	0.19492	0.999955	129	0	-0.042701
Tcf20	11	0.37428	0.70717	0.999995	481	6	-0.095965	0.7221	0.72155	0.999955	483	0	-0.095965
Setd7	11	0.37523	0.70819	0.999995	482	5	-0.017909	0.12835	0.12823	0.999955	85	0	-0.017909
H2-DMa	6	0.376	0.63637	0.999995	483	2	1.2235	0.64817	0.64584	0.999955	431	0	1.2235
Rsf1	11	0.37661	0.7094	0.999995	484	6	-0.22945	0.71177	0.71145	0.999955	474	0	-0.22945
Tnfsf4	11	0.37891	0.71157	0.999995	485	3	1.3347	0.097909	0.097558	0.999955	65	0	1.3347
Piwil4	11	0.38016	0.71258	0.999995	486	5	0.76001	0.93231	0.9313	0.999955	649	0	0.76001
Lef1	10	0.38336	0.71282	0.999995	487	5	0.45437	0.40587	0.40414	0.999955	269	0	0.45437
Cdyl	11	0.38363	0.71557	0.999995	488	6	-0.43042	0.68167	0.68142	0.999955	454	0	-0.43042
Gm8909	11	0.39118	0.72191	0.999995	489	5	0.66547	0.26272	0.2634	0.999955	180	0	0.66547
Phf2	11	0.39488	0.72543	0.999995	490	6	-0.051791	0.91399	0.91368	0.999955	628	0	-0.051791
Ido1	10	0.39491	0.72113	0.999995	491	4	0.84355	0.38377	0.38198	0.999955	257	0	0.84355
Ido2	9	0.39834	0.70526	0.999995	492	5	-0.062983	0.61103	0.61168	0.999955	410	0	-0.062983
Jak2	10	0.3994	0.72407	0.999995	493	2	1.3932	0.070329	0.070394	0.999955	49	0	1.3932
Psma3	6	0.40144	0.65582	0.999995	494	3	0.066332	0.575	0.57222	0.999955	384	0	0.066332
Ctla4	9	0.40252	0.70903	0.999995	495	4	0.047979	0.86661	0.86621	0.999955	592	0	0.047979
Kdm5b	11	0.40469	0.73465	0.999995	496	6	-0.13894	0.61748	0.61732	0.999955	416	0	-0.13894
Arnt	11	0.40544	0.73535	0.999995	497	4	1.0235	0.41897	0.41964	0.999955	278	0	1.0235
Irf4	10	0.40627	0.7292	0.999995	498	4	0.51125	0.7375	0.73691	0.999955	500	0	0.51125
Suv420h2	9	0.40743	0.71382	0.999995	499	5	-0.010206	0.81962	0.81976	0.999955	558	0	-0.010206
Aurkc	8	0.40923	0.70401	0.999995	500	4	-0.11783	0.66656	0.66735	0.999955	446	0	-0.11783
Prmt6	11	0.40925	0.73854	0.999995	501	5	0.45426	0.59816	0.59769	0.999955	401	0	0.45426
Msh6	11	0.41474	0.74311	0.999995	502	4	0.49152	0.85093	0.85093	0.999955	583	0	0.49152
Kmt2a	6	0.41539	0.66593	0.999995	503	2	0.84121	0.0065407	0.0069419	0.720966	7	1	0.84121
Hmga1	6	0.41656	0.66663	0.999995	504	3	-4.4671e-06	0.79408	0.79292	0.999955	542	0	-4.4671e-06
H2-Q10	8	0.41821	0.7108	0.999995	505	4	-0.03392	0.73504	0.73548	0.999955	496	0	-0.03392
Zcwpw1	11	0.42456	0.75172	0.999995	506	4	0.96459	0.52332	0.52392	0.999955	351	0	0.96459
Smarcd3	11	0.42895	0.75569	0.999995	507	3	0.94235	0.091448	0.091294	0.999955	60	0	0.94235
Hdac6	11	0.43344	0.75898	0.999995	508	4	0.51734	0.153	0.15404	0.999955	100	0	0.51734
Rnf40	9	0.43746	0.73954	0.999995	509	2	3.2614	0.33329	0.33413	0.999955	218	0	3.2614
Il2	9	0.43865	0.74054	0.999995	510	5	-0.12215	0.74641	0.74768	0.999955	509	0	-0.12215
Prdm15	11	0.44145	0.76553	0.999995	511	4	0.20782	0.45667	0.45776	0.999955	309	0	0.20782
Arid4a	11	0.44173	0.76574	0.999995	512	6	-0.26553	0.036855	0.037876	0.999955	22	1	-0.26553
Pgls	11	0.4429	0.76672	0.999995	513	6	-0.11547	0.61094	0.61048	0.999955	409	0	-0.11547
Kat2a	11	0.44353	0.76721	0.999995	514	2	1.2121	0.084944	0.08497	0.999955	54	0	1.2121
Pmp22	10	0.4443	0.75627	0.999995	515	4	-0.016374	0.28876	0.28629	0.999955	194	0	-0.016374
Mybl1	11	0.44462	0.76815	0.999995	516	5	0.2081	0.36125	0.362	0.999955	242	0	0.2081
Smad6	11	0.44868	0.77139	0.999995	517	5	0.4839	0.055823	0.056767	0.999955	40	0	0.4839
Prmt7	9	0.45026	0.75073	0.999995	518	5	-0.11212	0.86948	0.86904	0.999955	593	0	-0.11212
Cbx2	8	0.45106	0.73429	0.999995	519	4	0.27404	0.92357	0.92334	0.999955	634	0	0.27404
Hr	10	0.45393	0.76274	0.999995	520	4	0.39892	0.84232	0.84139	0.999955	577	0	0.39892
Dpf1	10	0.46134	0.76766	0.999995	521	5	0.68699	0.06429	0.064763	0.999955	43	0	0.68699
Mael	11	0.46471	0.78379	0.999995	522	6	-0.31075	0.016148	0.016175	0.999955	9	1	-0.31075
Tnfrsf4	9	0.46696	0.76488	0.999995	523	5	-0.27781	0.78193	0.78183	0.999955	535	0	-0.27781
Phc3	10	0.46934	0.77314	0.999995	524	5	-0.12862	0.3139	0.31193	0.999955	208	0	-0.12862
Sp110	9	0.47135	0.76837	0.999995	525	5	-0.23223	0.53458	0.53561	0.999955	357	0	-0.23223
Il6	9	0.47156	0.76854	0.999995	526	4	1.0509	0.11361	0.11407	0.999955	75	0	1.0509
Jak3	11	0.47781	0.79406	0.999995	527	4	1.2218	0.56816	0.56822	0.999955	378	0	1.2218
Ctnnb1	8	0.47912	0.75455	0.999995	528	4	-0.072578	0.61852	0.61951	0.999955	417	0	-0.072578
Trim66	10	0.48091	0.78128	0.999995	529	4	0.76445	0.71673	0.71593	0.999955	479	0	0.76445
Fbxl19	11	0.48289	0.79772	0.999995	530	3	0.67844	0.54796	0.54862	0.999955	369	0	0.67844
Dxo	6	0.48604	0.71819	0.999995	531	2	0.69614	0.80949	0.80825	0.999955	551	0	0.69614
Cd28	11	0.48625	0.80027	0.999995	532	6	-0.020894	0.29116	0.29231	0.999955	196	0	-0.020894
Sirt4	11	0.49239	0.80484	0.999995	533	5	0.086303	0.16147	0.16234	0.999955	105	0	0.086303
Hat1	10	0.49806	0.79333	0.999995	534	4	0.44794	0.22172	0.22011	0.999955	146	0	0.44794
Baz2a	10	0.50069	0.79517	0.999995	535	4	1.1531	0.12882	0.12801	0.999955	86	0	1.1531
Cd86	10	0.50426	0.7974	0.999995	536	5	-0.11832	0.84665	0.84593	0.999955	580	0	-0.11832
Dnajc1	11	0.50618	0.81394	0.999995	537	5	0.27368	0.73633	0.7363	0.999955	498	0	0.27368
Kat2b	11	0.50741	0.81462	0.999995	538	5	0.099664	0.66844	0.66775	0.999955	448	0	0.099664
Cxcr4	11	0.51275	0.81745	0.999995	539	4	0.62814	0.40765	0.40834	0.999955	270	0	0.62814
Chd9	11	0.51399	0.81818	0.999995	540	5	0.18379	0.80392	0.80433	0.999955	547	0	0.18379
Pax5	10	0.51814	0.80655	0.999995	541	3	0.94915	0.5208	0.51879	0.999955	346	0	0.94915
Ccl2	10	0.5214	0.80875	0.999995	542	5	0.10273	0.14459	0.14351	0.999955	95	0	0.10273
Aanat	8	0.52306	0.78539	0.999995	543	3	1.7485	0.53486	0.53432	0.999955	358	0	1.7485
H2-Q7	7	0.52571	0.78001	0.999995	544	3	1.4351	0.6261	0.62774	0.999955	422	0	1.4351
Tcf3	11	0.52583	0.82507	0.999995	545	5	0.90944	0.13581	0.13578	0.999955	91	0	0.90944
Phf11a	6	0.53083	0.75091	0.999995	546	3	-0.13201	0.065644	0.066158	0.999955	45	0	-0.13201
Gm7030	9	0.53191	0.80848	0.999995	547	4	0.0035541	0.62433	0.62539	0.999955	420	0	0.0035541
Kdm1a	11	0.53438	0.82967	0.999995	548	1	3.668	0.10305	0.10288	0.999955	68	0	3.668
Brd3	11	0.53545	0.83031	0.999995	549	5	0.00054775	0.53754	0.5382	0.999955	362	0	0.00054775
Suds3	8	0.53662	0.79472	0.999995	550	4	0.17814	0.31523	0.31484	0.999955	209	0	0.17814
Ring1	10	0.53777	0.81925	0.999995	551	4	0.37291	0.50327	0.5017	0.999955	336	0	0.37291
Cbx3	6	0.53976	0.7571	0.999995	552	3	-0.015344	0.67293	0.67092	0.999955	449	0	-0.015344
Ptger2	10	0.54033	0.82094	0.999995	553	3	0.58102	0.80375	0.80271	0.999955	546	0	0.58102
Psmb10	10	0.54267	0.82235	0.999995	554	5	-0.0059626	0.47084	0.46815	0.999955	317	0	-0.0059626
Slc38a1	9	0.54301	0.81455	0.999995	555	2	1.3165	0.69474	0.69628	0.999955	459	0	1.3165
Stat4	9	0.54466	0.81532	0.999995	556	3	0.11254	0.50442	0.50579	0.999955	337	0	0.11254
Mllt1	10	0.55054	0.8274	0.999995	557	3	1.1875	0.16777	0.1663	0.999955	111	0	1.1875
Havcr2	9	0.55188	0.81886	0.999995	558	4	0.52146	0.82338	0.8234	0.999955	562	0	0.52146
Mbd6	11	0.55256	0.83936	0.999995	559	5	-0.079499	0.19228	0.19261	0.999955	128	0	-0.079499
Prkaa2	10	0.56129	0.83448	0.999995	560	2	1.4606	0.71005	0.70881	0.999955	473	0	1.4606
Ccl12	7	0.57367	0.80494	0.999995	561	3	0.37723	0.74514	0.74568	0.999955	506	0	0.37723
Ltbr	10	0.58079	0.84741	0.999995	562	5	0.27261	0.25296	0.251	0.999955	172	0	0.27261
Kmt2e	6	0.58104	0.78805	0.999995	563	3	0.28851	0.49133	0.48887	0.999955	330	0	0.28851
Shprh	10	0.58242	0.8484	0.999995	564	5	0.71621	0.74625	0.74539	0.999955	508	0	0.71621
Cxcl12	9	0.58601	0.83685	0.999995	565	4	0.13081	0.17212	0.17374	0.999955	114	0	0.13081
Nat8l	9	0.58725	0.83756	0.999995	566	4	0.19972	0.52152	0.52277	0.999955	348	0	0.19972
Ep400	11	0.58945	0.85892	0.999995	567	4	0.54513	0.43769	0.43856	0.999955	289	0	0.54513
Phf1	10	0.59274	0.8549	0.999995	568	5	0.27634	0.61369	0.61188	0.999955	412	0	0.27634
Brwd3	10	0.59764	0.85791	0.999995	569	5	0.028296	0.22582	0.22443	0.999955	152	0	0.028296
Cdyl2	9	0.61153	0.85035	0.999995	570	4	0.17807	0.35399	0.35467	0.999955	236	0	0.17807
Hdgfrp2	10	0.61259	0.86726	0.999995	571	2	1.0162	0.51547	0.51368	0.999955	344	0	1.0162
Hmg20b	11	0.61896	0.87389	0.999995	572	2	1.1631	0.029997	0.0309	0.999955	17	1	1.1631
H2-DMb1	9	0.62284	0.8566	0.999995	573	3	0.4242	0.73383	0.73503	0.999955	493	0	0.4242
Nf1	10	0.62554	0.87444	0.999995	574	2	1.3479	0.052106	0.052423	0.999955	35	0	1.3479
Smarca1	11	0.63621	0.88246	0.999995	575	5	-0.0055224	0.11071	0.1109	0.999955	72	0	-0.0055224
Hira	11	0.63654	0.8826	0.999995	576	5	0.31362	0.27865	0.27942	0.999955	191	0	0.31362
Kdm5a	11	0.64078	0.88481	0.999995	577	5	0.22726	0.52905	0.5297	0.999955	354	0	0.22726
Mllt3	6	0.64228	0.83202	0.999995	578	3	0.44235	0.72398	0.72267	0.999955	486	0	0.44235
Pick1	10	0.6564	0.88656	0.999995	579	2	1.2802	0.61423	0.61256	0.999955	413	0	1.2802
Dido1	11	0.65854	0.89313	0.999995	580	5	-0.032621	0.10048	0.10037	0.999955	67	0	-0.032621
Il10	9	0.65888	0.87546	0.999995	581	4	1.4626	0.32027	0.32137	0.999955	212	0	1.4626
Trim33	10	0.65896	0.88757	0.999995	582	3	1.2292	0.5701	0.56919	0.999955	380	0	1.2292
Glt28d2	9	0.6627	0.87733	0.999995	583	2	1.5923	0.44642	0.44703	0.999955	299	0	1.5923
Cd80	11	0.66664	0.89738	0.999995	584	4	0.6103	0.11198	0.11218	0.999955	74	0	0.6103
Wt1	10	0.66856	0.89148	0.999995	585	2	1.3413	0.7455	0.74469	0.999955	507	0	1.3413
Sirt7	9	0.67339	0.88308	0.999995	586	4	1.4083	0.084066	0.083624	0.999955	53	0	1.4083
Pcgf1	11	0.67588	0.90208	0.999995	587	2	3.1865	0.18409	0.18463	0.999955	123	0	3.1865
Eng	10	0.68142	0.89659	0.999995	588	4	1.5236	0.34793	0.34619	0.999955	230	0	1.5236
H2-K1	11	0.68267	0.90579	0.999995	589	2	0.079222	0.17582	0.17625	0.999955	118	0	0.079222
Rcor1	9	0.68389	0.88907	0.999995	590	2	1.0267	0.44505	0.44569	0.999955	297	0	1.0267
Cd27	6	0.6845	0.85307	0.999995	591	2	0.25192	0.55848	0.55549	0.999955	372	0	0.25192
Prdm1	11	0.69114	0.90988	0.999995	592	4	1.0991	0.34987	0.35041	0.999955	232	0	1.0991
Foxp3	10	0.69183	0.90089	0.999995	593	3	0.72292	0.47157	0.46889	0.999955	318	0	0.72292
Stat3	11	0.69203	0.91031	0.999995	594	5	0.30309	0.58181	0.58153	0.999955	389	0	0.30309
Psmb8	10	0.69516	0.90214	0.999995	595	2	0.46651	0.72247	0.72155	0.999955	484	0	0.46651
Kdm4a	10	0.69856	0.90364	0.999995	596	4	0.58295	0.33824	0.33644	0.999955	222	0	0.58295
Fxyd1	10	0.70107	0.9047	0.999995	597	3	1.1486	0.23899	0.23731	0.999955	157	0	1.1486
Cd8a	10	0.70126	0.9048	0.999995	598	3	0.60799	0.11509	0.11468	0.999955	77	0	0.60799
Lrp5	9	0.70246	0.89826	0.999995	599	4	0.79735	0.24268	0.24337	0.999955	160	0	0.79735
Nt5e	10	0.70708	0.90699	0.999995	600	2	0.82986	0.24899	0.24729	0.999955	169	0	0.82986
Ube2e1	10	0.71114	0.90879	0.999995	601	4	0.27761	0.92974	0.92907	0.999955	645	0	0.27761
Jade2	6	0.71363	0.86428	0.999995	602	2	0.82323	0.22067	0.22016	0.999955	145	0	0.82323
Gm6251	6	0.72	0.86687	0.999995	603	2	0.40531	0.052442	0.052977	0.999955	36	0	0.40531
Prdm2	10	0.72024	0.9126	0.999995	604	4	0.58582	0.76748	0.76597	0.999955	521	0	0.58582
Nptxr	11	0.72195	0.92401	0.999995	605	5	0.37356	0.40852	0.40913	0.999955	273	0	0.37356
Hmga1-rs1	7	0.72434	0.88687	0.999995	606	3	0.15868	0.80522	0.80583	0.999955	548	0	0.15868
Mapk1	9	0.7274	0.91058	0.999995	607	4	0.18304	0.23997	0.24078	0.999955	158	0	0.18304
Smad4	9	0.72988	0.9118	0.999995	608	1	2.6596	0.36102	0.36169	0.999955	241	0	2.6596
Kat7	6	0.73869	0.8746	0.999995	609	2	1.4717	0.36852	0.36629	0.999955	246	0	1.4717
Tap1	9	0.7425	0.91836	0.999995	610	3	1.8283	0.76841	0.76871	0.999955	522	0	1.8283
4632428N05Rik	11	0.74258	0.93056	0.999995	611	4	0.47685	0.20844	0.20835	0.999955	140	0	0.47685
2410016O06Rik	10	0.74524	0.92278	0.999995	612	3	1.3824	0.17968	0.17831	0.999955	122	0	1.3824
Phf3	11	0.74566	0.93143	0.999995	613	2	1.1615	0.77405	0.7739	0.999955	530	0	1.1615
Satb1	10	0.75563	0.92674	0.999995	614	3	1.1131	0.38792	0.38641	0.999955	258	0	1.1131
Mllt6	10	0.76047	0.92847	0.999995	615	4	1.1741	0.60819	0.60646	0.999955	408	0	1.1741
Phrf1	10	0.76295	0.92944	0.999995	616	4	0.94435	0.11163	0.11147	0.999955	73	0	0.94435
Flt1	10	0.79154	0.94106	0.999995	617	3	1.3413	0.30654	0.30468	0.999955	201	0	1.3413
Vegfa	11	0.79275	0.94556	0.999995	618	4	0.49974	0.11451	0.11478	0.999955	76	0	0.49974
Nap1l3	10	0.79781	0.94337	0.999995	619	4	0.38817	0.27732	0.275	0.999955	190	0	0.38817
Hdac11	10	0.7999	0.94426	0.999995	620	4	1.0443	0.26377	0.26154	0.999955	181	0	1.0443
Asf1b	10	0.80542	0.94625	0.999995	621	4	0.64239	0.30469	0.30302	0.999955	200	0	0.64239
Stat1	11	0.80569	0.95001	0.999995	622	2	1.16	0.84583	0.84589	0.999955	579	0	1.16
Arg1	11	0.80745	0.95058	0.999995	623	3	0.44357	0.35842	0.35895	0.999955	239	0	0.44357
Piwil2	10	0.80791	0.94727	0.999995	624	4	0.28003	0.79217	0.79098	0.999955	538	0	0.28003
Kdm3b	11	0.81223	0.95207	0.999995	625	4	0.60489	0.10816	0.10829	0.999955	70	0	0.60489
Arrb1	11	0.81455	0.95269	0.999995	626	4	0.63519	0.78339	0.78299	0.999955	536	0	0.63519
Jade1	6	0.81485	0.90851	0.999995	627	1	0.84829	0.24967	0.24961	0.999955	170	0	0.84829
Asf1a	8	0.81589	0.93487	0.999995	628	2	0.2596	0.37146	0.37148	0.999955	250	0	0.2596
Hdac8	8	0.81742	0.93563	0.999995	629	3	0.95301	0.36664	0.36654	0.999955	245	0	0.95301
Cd274	11	0.82631	0.95642	0.999995	630	4	0.51663	0.39791	0.39805	0.999955	265	0	0.51663
Btg3	7	0.82665	0.92946	0.999995	631	2	0.79926	0.39079	0.39159	0.999955	261	0	0.79926
H2-Q6	10	0.82821	0.95534	0.999995	632	3	1.0451	0.46648	0.464	0.999955	314	0	1.0451
Ing1	11	0.82988	0.95757	0.999995	633	2	0.82941	0.24319	0.24373	0.999955	161	0	0.82941
Hdac5	11	0.83143	0.95812	0.999995	634	3	1.9038	0.44849	0.44954	0.999955	303	0	1.9038
Zfp57	10	0.83318	0.95642	0.999995	635	3	1.4021	0.090601	0.08979	0.999955	59	0	1.4021
Trerf1	6	0.83648	0.9194	0.999995	636	2	1.2583	0.1718	0.17166	0.999955	113	0	1.2583
Kir3dl2	8	0.8398	0.94619	0.999995	637	2	1.4152	0.24586	0.24452	0.999955	165	0	1.4152
Setd1b	6	0.84042	0.92117	0.999995	638	2	1.1175	0.67626	0.67414	0.999955	453	0	1.1175
Hif1a	11	0.84375	0.9618	0.999995	639	2	1.1919	0.042309	0.043418	0.999955	28	0	1.1919
Sirt5	10	0.85144	0.96047	0.999995	640	3	0.68363	0.17537	0.17379	0.999955	117	0	0.68363
Nos2	11	0.85168	0.96436	0.999995	641	4	0.85967	0.025861	0.026635	0.999955	16	1	0.85967
Ep300	11	0.85452	0.96522	0.999995	642	3	1.4386	0.84916	0.84918	0.999955	581	0	1.4386
Epc2	8	0.85563	0.95316	0.999995	643	2	0.95226	0.43493	0.43464	0.999955	286	0	0.95226
Sfmbt2	9	0.86255	0.95761	0.999995	644	3	0.45098	0.12086	0.1216	0.999955	82	0	0.45098
Kmt2c	6	0.86265	0.933	0.999995	645	1	0.61377	0.57311	0.57032	0.999955	383	0	0.61377
Mum1	10	0.86294	0.96308	0.999995	646	3	0.6493	0.53001	0.52831	0.999955	355	0	0.6493
Grn	10	0.86526	0.96372	0.999995	647	2	1.7268	0.11624	0.11578	0.999955	78	0	1.7268
Lgals9	11	0.867	0.96918	0.999995	648	4	0.89409	0.7527	0.75244	0.999955	513	0	0.89409
Ednrb	11	0.86719	0.96924	0.999995	649	3	0.53047	0.35558	0.3562	0.999955	238	0	0.53047
Tcf19	11	0.86827	0.96957	0.999995	650	4	0.82845	0.045026	0.046218	0.999955	30	0	0.82845
Vegfc	9	0.87045	0.9605	0.999995	651	3	1.255	0.0028898	0.0029341	0.355516	6	1	1.255
Nat14	11	0.87313	0.97092	0.999995	652	4	0.63246	0.65845	0.65725	0.999955	443	0	0.63246
H2-M3	9	0.87812	0.96333	0.999995	653	2	0.59188	0.8074	0.80806	0.999955	549	0	0.59188
2610002M06Rik	8	0.87937	0.95926	0.999995	654	2	1.5024	0.39769	0.3977	0.999955	264	0	1.5024
Hif3a	10	0.88539	0.96883	0.999995	655	2	0.73934	0.27444	0.27187	0.999955	188	0	0.73934
Naa60	6	0.88539	0.94586	0.999995	656	1	2.3684	0.58844	0.58645	0.999955	393	0	2.3684
Smyd1	10	0.88703	0.96917	0.999995	657	3	0.69153	0.76575	0.76405	0.999955	520	0	0.69153
Proc	9	0.88915	0.96756	0.999995	658	3	0.73304	0.099999	0.10007	0.999955	66	0	0.73304
Phf14	9	0.89003	0.9679	0.999995	659	3	1.0283	0.58742	0.58811	0.999955	391	0	1.0283
Suv39h1	9	0.89408	0.96924	0.999995	660	3	0.49416	0.81836	0.81848	0.999955	557	0	0.49416
Nf2	11	0.89443	0.97661	0.999995	661	1	10.111	2.9758e-06	4.9479e-06	0.001799	2	3	10.111
Rai1	10	0.89701	0.97192	0.999995	662	3	1.1234	0.63447	0.63276	0.999955	425	0	1.1234
Kdm4b	9	0.90924	0.97437	0.999995	663	2	1.7814	0.25525	0.25587	0.999955	174	0	1.7814
Rab33b	10	0.91129	0.97628	0.999995	664	3	0.92298	0.81418	0.813	0.999955	552	0	0.92298
Icos	8	0.91178	0.96762	0.999995	665	2	1.0362	0.24022	0.23872	0.999955	159	0	1.0362
Dpf3	11	0.91565	0.98056	0.999995	666	2	0.86364	0.33048	0.33115	0.999955	217	0	0.86364
Mmp9	11	0.91923	0.9812	0.999995	667	3	0.73498	0.16748	0.16797	0.999955	110	0	0.73498
Hdgf	11	0.92144	0.98166	0.999995	668	1	2.7828	0.20959	0.20958	0.999955	142	0	2.7828
Deaf1	9	0.9219	0.97649	0.999995	669	2	0.47877	0.68987	0.69136	0.999955	457	0	0.47877
Socs6	10	0.92221	0.97952	0.999995	670	2	2.4811	0.12198	0.12155	0.999955	84	0	2.4811
Tnfrsf14	10	0.92649	0.98098	0.999995	671	1	0.91931	0.45093	0.44841	0.999955	307	0	0.91931
Dpep1	11	0.93198	0.98422	0.999995	672	3	1.4534	0.28701	0.28786	0.999955	193	0	1.4534
Apc	8	0.93374	0.97442	0.999995	673	2	3.1859	0.037935	0.038084	0.999955	23	0	3.1859
Nap1l5	10	0.93557	0.98359	0.999995	674	2	0.39433	0.85613	0.85489	0.999955	586	0	0.39433
Tdrd9	11	0.93577	0.98504	0.999995	675	3	0.46239	0.38802	0.38783	0.999955	259	0	0.46239
L3mbtl1	10	0.94207	0.98562	0.999995	676	2	0.18718	0.85204	0.85095	0.999955	585	0	0.18718
Snd1	11	0.94212	0.98656	0.999995	677	3	2.8465	0.28388	0.28447	0.999955	192	0	2.8465
Bahd1	11	0.94379	0.98697	0.999995	678	3	0.72063	0.72033	0.7199	0.999955	482	0	0.72063
B2m	10	0.9446	0.98641	0.999995	679	2	4.2529	0.4288	0.42631	0.999955	283	0	4.2529
Tgfb1	11	0.94922	0.9882	0.999995	680	3	0.23024	0.73968	0.73953	0.999955	502	0	0.23024
Ccl17	9	0.94989	0.98284	0.999995	681	2	1.0169	0.40835	0.40898	0.999955	272	0	1.0169
Cbx6	10	0.95548	0.98812	0.999995	682	2	2.92	0.13109	0.1301	0.999955	87	0	2.92
Gmeb1	10	0.95904	0.9888	0.999995	683	2	0.71498	0.54479	0.54333	0.999955	366	0	0.71498
Adora2a	11	0.95944	0.99075	0.999995	684	3	1.0964	0.18761	0.18834	0.999955	127	0	1.0964
Smad3	11	0.96051	0.99099	0.999995	685	2	0.94635	0.14198	0.1425	0.999955	94	0	0.94635
Phf10	10	0.96187	0.9892	0.999995	686	2	0.89154	0.3409	0.3391	0.999955	224	0	0.89154
Cd276	9	0.96281	0.98657	0.999995	687	2	0.61504	0.06897	0.068068	0.999955	47	0	0.61504
Map2k1	9	0.96704	0.98783	0.999995	688	2	1.6971	0.37029	0.37051	0.999955	248	0	1.6971
Map2k2	10	0.96799	0.99053	0.999995	689	2	2.1573	0.16559	0.16406	0.999955	108	0	2.1573
H2-Eb1	10	0.96839	0.9906	0.999995	690	2	0.38392	0.72328	0.72242	0.999955	485	0	0.38392
Nfe2l2	9	0.97107	0.98935	0.999995	691	1	0.48436	0.43328	0.4343	0.999955	285	0	0.48436
Taf5l	11	0.97249	0.99361	0.999995	692	1	2.3658	0.35082	0.35143	0.999955	233	0	2.3658
Sirt1	11	0.97295	0.99368	0.999995	693	1	1.6911	0.872	0.87241	0.999955	596	0	1.6911
Il17a	9	0.9739	0.99023	0.999995	694	2	1.3151	0.053653	0.052631	0.999955	37	0	1.3151
Mbd3	10	0.97437	0.9921	0.999995	695	1	2.957	0.1557	0.15461	0.999955	102	0	2.957
Tada2b	10	0.97531	0.99233	0.999995	696	1	1.8727	0.2248	0.22326	0.999955	149	0	1.8727
Adora2b	9	0.9781	0.99183	0.999995	697	2	1.9075	0.69109	0.69276	0.999955	458	0	1.9075
Ado	10	0.98162	0.99395	0.999995	698	2	2.4509	0.23799	0.23642	0.999955	156	0	2.4509
Relb	11	0.9827	0.99542	0.999995	699	2	5.5035	0.032746	0.03375	0.999955	20	1	5.5035
Il4	9	0.98333	0.99314	0.999995	700	1	1.7926	0.56254	0.56337	0.999955	376	0	1.7926
Taf6l	9	0.98412	0.99332	0.999995	701	1	2.6564	0.37488	0.37511	0.999955	253	0	2.6564
Flt4	11	0.98474	0.99584	0.999995	702	1	2.2538	0.23214	0.23254	0.999955	155	0	2.2538
Ccr4	10	0.98479	0.99492	0.999995	703	2	2.6837	0.034808	0.03468	0.999955	21	0	2.6837
Tdrd1	11	0.98718	0.99652	0.999995	704	2	1.1697	0.3344	0.33531	0.999955	219	0	1.1697
Ube2a	11	0.99044	0.99724	0.999995	705	2	1.3362	0.72562	0.72528	0.999955	487	0	1.3362
Mapk3	11	0.99075	0.99729	0.999995	706	2	1.482	0.27549	0.27628	0.999955	189	0	1.482
Mta3	9	0.9926	0.99531	0.999995	707	1	1.628	0.44092	0.44156	0.999955	292	0	1.628
Vegfb	9	0.99321	0.99551	0.999995	708	1	1.641	0.69594	0.69761	0.999955	461	0	1.641
Trp53	10	0.99393	0.99687	0.999995	709	1	2.3979	0.065501	0.065802	0.999955	44	0	2.3979
Jak1	11	0.99528	0.99843	0.999995	710	1	1.5126	0.46554	0.46651	0.999955	313	0	1.5126
Rb1	11	0.99559	0.99847	0.999995	711	1	2.6335	0.088851	0.088642	0.999955	57	0	2.6335
Stat5a	9	0.99648	0.99698	0.999995	712	1	1.5487	0.24359	0.24433	0.999955	162	0	1.5487
Adora1	11	0.99656	0.99862	0.999995	713	1	2.4129	0.56152	0.56172	0.999955	374	0	2.4129
Asxl3	9	0.99712	0.99741	0.999995	714	1	0.916	0.43537	0.4363	0.999955	288	0	0.916
Setd5	11	0.99812	0.99895	0.999995	715	1	2.4382	0.17464	0.17514	0.999955	116	0	2.4382
Pdcd1	11	0.99835	0.99902	0.999995	716	1	2.0749	0.039586	0.040786	0.999955	25	0	2.0749
Tada1	10	0.99893	0.99876	0.999995	717	1	2.4395	0.031064	0.031018	0.999955	18	1	2.4395
Tapbp	11	0.99969	0.99972	0.999995	718	0	1.2378	0.26057	0.26122	0.999955	178	0	1.2378
Tsc1	10	0.99976	0.99969	0.999995	719	0	4.4593	0.021018	0.021142	0.999955	13	1	4.4593
Tap2	10	0.99977	0.9997	0.999995	720	0	2.7584	0.18505	0.184	0.999955	124	0	2.7584
Trim28	9	0.99984	0.99984	0.999995	721	0	0.96607	0.51304	0.51437	0.999955	342	0	0.96607
Usp22	10	0.99985	0.99977	0.999995	722	0	2.7411	0.087053	0.086573	0.999955	56	0	2.7411
Tsc2	9	0.99999	1	0.999995	723	0	6.3583	0.041461	0.040489	0.999955	27	0	6.3583
Kdm2b	11	1	1	0.999995	724	0	4.4344	0.07445	0.074877	0.999955	50	0	4.4344
Sirt6	9	1	1	0.999995	725	0	4.3043	0.39442	0.39492	0.999955	263	0	4.3043
Pten	11	1	1	0.999995	726	0	6.5014	3.8238e-05	9.401e-05	0.022782	3	2	6.5014
Fbxw7	11	1	1	0.999995	727	0	8.5917	2.5632e-06	4.9479e-06	0.001799	1	3	8.5917
